# Supplementary material for: Iron(ii) coordination complexes with panchromatic absorption and nanosecond charge-transfer excited state lifetimes
Source: Springer Nature journal article supplement (doi:10.1038/s41557-019-0357-z), 2019-11-18
Supplement: 41557_2019_357_MOESM46_ESM.cif [file 41557_2019_357_MOESM46_ESM.cif]

data_3a

# start Validation Reply Form
_vrf_PLAT410_3a
;
PROBLEM: Short Intra H...H Contact  H37      ..H50      .       1.85 Ang.  
RESPONSE: The ligand geometry enforces this short intraligand contact.
;
# end Validation Reply Form

_audit_creation_date               2019-05-30
_audit_creation_method
;
Olex2 1.2
(compiled May 18 2018 14:05:52 for OlexSys, GUI svn.r5506)
;
_shelx_SHELXL_version_number       '2018/3'
_audit_contact_author_address      ?
_audit_contact_author_email        ?
_audit_contact_author_name         ''
_audit_contact_author_phone        ?
_publ_contact_author_id_orcid      ?
_publ_section_references
;
Dolomanov, O.V., Bourhis, L.J., Gildea, R.J, Howard, J.A.K. & Puschmann, H.
 (2009), J. Appl. Cryst. 42, 339-341.

Sheldrick, G.M. (2015). Acta Cryst. C71, 3-8.
;
_chemical_name_common              ?
_chemical_name_systematic          ?
_chemical_formula_moiety           'C52 H44 Fe N6, C2.5 H5.5'
_chemical_formula_sum              'C54.50 H49.50 Fe N6'
_chemical_formula_weight           844.35
_chemical_melting_point            ?
loop_
  _atom_type_symbol
  _atom_type_description
  _atom_type_scat_dispersion_real
  _atom_type_scat_dispersion_imag
  _atom_type_scat_source
 'C' 'C' 0.0033 0.0016 'International Tables Vol C Tables 4.2.6.8 and 6.1.1.4'
 'H' 'H' 0.0000 0.0000 'International Tables Vol C Tables 4.2.6.8 and 6.1.1.4'
 'Fe' 'Fe' 0.3463 0.8444 'International Tables Vol C Tables 4.2.6.8 and 6.1.1.4'
 'N' 'N' 0.0061 0.0033 'International Tables Vol C Tables 4.2.6.8 and 6.1.1.4'

_shelx_space_group_comment
;
The symmetry employed for this shelxl refinement is uniquely defined
by the following loop, which should always be used as a source of
symmetry information in preference to the above space-group names.
They are only intended as comments.
;
_space_group_crystal_system        'triclinic'
_space_group_IT_number             2
_space_group_name_H-M_alt          'P -1'
_space_group_name_Hall             '-P 1'
loop_
  _space_group_symop_operation_xyz
 'x, y, z'
 '-x, -y, -z'

_cell_length_a                     11.8116(11)
_cell_length_b                     11.8288(11)
_cell_length_c                     15.8752(15)
_cell_angle_alpha                  95.132(5)
_cell_angle_beta                   92.310(5)
_cell_angle_gamma                  102.631(5)
_cell_volume                       2151.6(4)
_cell_formula_units_Z              2
_cell_measurement_reflns_used      9763
_cell_measurement_temperature      150(2)
_cell_measurement_theta_max        30.73
_cell_measurement_theta_min        2.25
_shelx_estimated_absorpt_T_max     0.961
_shelx_estimated_absorpt_T_min     0.925
_exptl_absorpt_coefficient_mu      0.396
_exptl_absorpt_correction_T_max    0.7461
_exptl_absorpt_correction_T_min    0.5941
_exptl_absorpt_correction_type     multi-scan
_exptl_absorpt_process_details
;
SADABS-2014/5 (Bruker,2014) was used for absorption correction.
wR2(int) was 0.1076 before and 0.0928 after correction.
The Ratio of minimum to maximum transmission is 0.7963.
The \l/2 correction factor is Not present.
;
_exptl_absorpt_special_details     ?
_exptl_crystal_colour              red
_exptl_crystal_colour_primary      red
_exptl_crystal_density_diffrn      1.303
_exptl_crystal_density_meas        ?
_exptl_crystal_density_method      ?
_exptl_crystal_description         'block'
_exptl_crystal_F_000               889
_exptl_crystal_size_max            0.2
_exptl_crystal_size_mid            0.2
_exptl_crystal_size_min            0.1
_exptl_transmission_factor_max     ?
_exptl_transmission_factor_min     ?
_diffrn_reflns_av_R_equivalents    0.0957
_diffrn_reflns_av_unetI/netI       0.0639
_diffrn_reflns_Laue_measured_fraction_full  0.989
_diffrn_reflns_Laue_measured_fraction_max  0.968
_diffrn_reflns_limit_h_max         16
_diffrn_reflns_limit_h_min         -16
_diffrn_reflns_limit_k_max         16
_diffrn_reflns_limit_k_min         -16
_diffrn_reflns_limit_l_max         22
_diffrn_reflns_limit_l_min         -22
_diffrn_reflns_number              96193
_diffrn_reflns_point_group_measured_fraction_full  0.989
_diffrn_reflns_point_group_measured_fraction_max  0.968
_diffrn_reflns_theta_full          25.000
_diffrn_reflns_theta_max           30.963
_diffrn_reflns_theta_min           2.523
_diffrn_ambient_temperature        150.0
_diffrn_detector_area_resol_mean   ?
_diffrn_measured_fraction_theta_full  0.989
_diffrn_measured_fraction_theta_max  0.968
_diffrn_measurement_device_type    'Bruker D8 Quest ECO CMOS'
_diffrn_measurement_method         '\f and \w scans'
_diffrn_radiation_type             MoK\a
_diffrn_radiation_wavelength       0.71073
_diffrn_source                     ?
_diffrn_standards_number           0
_reflns_Friedel_coverage           0.000
_reflns_Friedel_fraction_full      .
_reflns_Friedel_fraction_max       .
_reflns_number_gt                  8987
_reflns_number_total               13227
_reflns_special_details
;
 Reflections were merged by SHELXL according to the crystal
 class for the calculation of statistics and refinement.
 
 _reflns_Friedel_fraction is defined as the number of unique
 Friedel pairs measured divided by the number that would be
 possible theoretically, ignoring centric projections and
 systematic absences.
;
_reflns_threshold_expression       'I > 2\s(I)'
_computing_cell_refinement         'SAINT v8.37A (Bruker, 2015)'
_computing_data_collection         ?
_computing_data_reduction          'SAINT v8.37A (Bruker, 2015)'
_computing_molecular_graphics      'Olex2 (Dolomanov et al., 2009)'
_computing_publication_material    'Olex2 (Dolomanov et al., 2009)'
_computing_structure_refinement    'ShelXL (Sheldrick, 2015)'
_computing_structure_solution      ?
_refine_diff_density_max           2.310
_refine_diff_density_min           -1.218
_refine_diff_density_rms           0.123
_refine_ls_extinction_coef         .
_refine_ls_extinction_method       none
_refine_ls_goodness_of_fit_ref     1.141
_refine_ls_hydrogen_treatment      constr
_refine_ls_matrix_type             full
_refine_ls_number_parameters       597
_refine_ls_number_reflns           13227
_refine_ls_number_restraints       30
_refine_ls_R_factor_all            0.1334
_refine_ls_R_factor_gt             0.0872
_refine_ls_restrained_S_all        1.151
_refine_ls_shift/su_max            0.000
_refine_ls_shift/su_mean           0.000
_refine_ls_structure_factor_coef   Fsqd
_refine_ls_weighting_details      
 'w=1/[\s^2^(Fo^2^)+(0.0170P)^2^+8.6823P] where P=(Fo^2^+2Fc^2^)/3'
_refine_ls_weighting_scheme        calc
_refine_ls_wR_factor_gt            0.1865
_refine_ls_wR_factor_ref           0.2125
_refine_special_details            ?
_olex2_refinement_description
;
1. Fixed Uiso
 At 1.2 times of:
  All C(H) groups, All C(H,H) groups
 At 1.5 times of:
  All C(H,H,H) groups
2. Restrained distances
 C14-C15A \\sim C14-C16A \\sim C14-C17A \\sim C14-C15B \\sim C14-C16B \\sim
C14-C17B
 with sigma of 0.02
 C15A-C16A \\sim C15A-C17A \\sim C16A-C17A \\sim C15B-C16B \\sim C15B-C17B
\\sim C16B-C17B
 with sigma of 0.02
3. Others
 Sof(C15B)=Sof(H15D)=Sof(H15E)=Sof(H15F)=Sof(C16B)=Sof(H16D)=Sof(H16E)=
 Sof(H16F)=Sof(C17B)=Sof(H17D)=Sof(H17E)=Sof(H17F)=1-FVAR(1)
 Sof(C15A)=Sof(H15A)=Sof(H15B)=Sof(H15C)=Sof(C16A)=Sof(H16A)=Sof(H16B)=
 Sof(H16C)=Sof(C17A)=Sof(H17A)=Sof(H17B)=Sof(H17C)=FVAR(1)
 Fixed Sof: C52(0.5) H52A(0.5) H52B(0.5) H52C(0.5)
4.a Secondary CH2 refined with riding coordinates:
 C53(H53A,H53B), C54(H54A,H54B)
4.b Aromatic/amide H refined with riding coordinates:
 C1(H1), C3(H3), C4(H4), C5(H5), C6(H6), C11(H11), C13(H13), C18(H18),
 C19(H19), C20(H20), C24(H24), C25(H25), C26(H26), C27(H27), C29(H29), C30(H30),
  C31(H31), C32(H32), C37(H37), C39(H39), C44(H44), C45(H45), C46(H46),
 C48(H48), C49(H49), C50(H50)
4.c Idealised Me refined as rotating group:
 C15A(H15A,H15B,H15C), C16A(H16A,H16B,H16C), C17A(H17A,H17B,H17C), C15B(H15D,
 H15E,H15F), C16B(H16D,H16E,H16F), C17B(H17D,H17E,H17F), C41(H41A,H41B,H41C),
 C42(H42A,H42B,H42C), C43(H43A,H43B,H43C), C52(H52A,H52B,H52C)
;
_atom_sites_solution_hydrogens     geom
_atom_sites_solution_primary       ?
_atom_sites_solution_secondary     ?
loop_
  _atom_site_label
  _atom_site_type_symbol
  _atom_site_fract_x
  _atom_site_fract_y
  _atom_site_fract_z
  _atom_site_U_iso_or_equiv
  _atom_site_adp_type
  _atom_site_occupancy
  _atom_site_site_symmetry_order
  _atom_site_calc_flag
  _atom_site_refinement_flags_posn
  _atom_site_refinement_flags_adp
  _atom_site_refinement_flags_occupancy
  _atom_site_disorder_assembly
  _atom_site_disorder_group
 C1 C 0.7317(3) 0.4728(3) 0.2111(2) 0.0255(7) Uani 1 1 d . . . . .
 H1 H 0.798979 0.451164 0.233151 0.031 Uiso 1 1 calc R . . . .
 C2 C 0.7436(3) 0.5883(3) 0.1880(2) 0.0273(7) Uani 1 1 d . . . . .
 C3 C 0.8522(4) 0.6684(4) 0.1974(3) 0.0355(9) Uani 1 1 d . . . . .
 H3 H 0.917743 0.646887 0.222556 0.043 Uiso 1 1 calc R . . . .
 C4 C 0.8635(4) 0.7761(4) 0.1706(3) 0.0414(10) Uani 1 1 d . . . . .
 H4 H 0.936868 0.829397 0.177513 0.050 Uiso 1 1 calc R . . . .
 C5 C 0.7683(4) 0.8092(4) 0.1331(3) 0.0426(10) Uani 1 1 d . . . . .
 H5 H 0.777330 0.884260 0.113933 0.051 Uiso 1 1 calc R . . . .
 C6 C 0.6611(4) 0.7325(3) 0.1241(3) 0.0352(8) Uani 1 1 d . . . . .
 H6 H 0.596805 0.755460 0.098424 0.042 Uiso 1 1 calc R . . . .
 C7 C 0.6454(3) 0.6213(3) 0.1520(2) 0.0253(7) Uani 1 1 d . . . . .
 C8 C 0.5346(3) 0.5368(3) 0.1468(2) 0.0231(6) Uani 1 1 d . . . . .
 C9 C 0.5329(3) 0.4272(3) 0.17435(19) 0.0217(6) Uani 1 1 d . . . . .
 C10 C 0.4268(3) 0.3409(3) 0.17539(19) 0.0209(6) Uani 1 1 d . . . . .
 C11 C 0.3249(3) 0.3703(3) 0.1462(2) 0.0239(7) Uani 1 1 d . . . . .
 H11 H 0.253465 0.314368 0.144868 0.029 Uiso 1 1 calc R . . . .
 C12 C 0.3248(3) 0.4796(3) 0.1188(2) 0.0270(7) Uani 1 1 d . . . . .
 C13 C 0.4283(3) 0.5616(3) 0.1189(2) 0.0268(7) Uani 1 1 d . . . . .
 H13 H 0.427832 0.635529 0.100079 0.032 Uiso 1 1 calc R . . . .
 C14 C 0.2088(3) 0.5090(4) 0.0917(2) 0.0355(9) Uani 1 1 d D . . . .
 C15A C 0.1344(9) 0.5090(12) 0.1690(5) 0.071(5) Uani 0.544(12) 1 d D . P A 1
 H15A H 0.171794 0.572983 0.211398 0.107 Uiso 0.544(12) 1 calc GR . P A 1
 H15B H 0.126833 0.434755 0.193534 0.107 Uiso 0.544(12) 1 calc GR . P A 1
 H15C H 0.057112 0.519193 0.151269 0.107 Uiso 0.544(12) 1 calc GR . P A 1
 C16A C 0.1386(8) 0.4041(7) 0.0287(5) 0.043(2) Uani 0.544(12) 1 d D . P A 1
 H16A H 0.064646 0.421014 0.009718 0.064 Uiso 0.544(12) 1 calc GR . P A 1
 H16B H 0.123454 0.332973 0.057630 0.064 Uiso 0.544(12) 1 calc GR . P A 1
 H16C H 0.184131 0.393032 -0.020445 0.064 Uiso 0.544(12) 1 calc GR . P A 1
 C17A C 0.2179(10) 0.6164(9) 0.0509(10) 0.091(6) Uani 0.544(12) 1 d D . P A 1
 H17A H 0.252944 0.683256 0.091696 0.136 Uiso 0.544(12) 1 calc GR . P A 1
 H17B H 0.140159 0.623203 0.031257 0.136 Uiso 0.544(12) 1 calc GR . P A 1
 H17C H 0.266555 0.614596 0.002481 0.136 Uiso 0.544(12) 1 calc GR . P A 1
 C15B C 0.1922(10) 0.6151(11) 0.1547(6) 0.056(4) Uani 0.456(12) 1 d D . P A 2
 H15D H 0.120641 0.638265 0.137418 0.085 Uiso 0.456(12) 1 calc GR . P A 2
 H15E H 0.258701 0.680877 0.153205 0.085 Uiso 0.456(12) 1 calc GR . P A 2
 H15F H 0.186955 0.591758 0.212336 0.085 Uiso 0.456(12) 1 calc GR . P A 2
 C16B C 0.1045(9) 0.4166(10) 0.0913(12) 0.088(8) Uani 0.456(12) 1 d D . P A 2
 H16D H 0.102079 0.359287 0.042299 0.132 Uiso 0.456(12) 1 calc GR . P A 2
 H16E H 0.035633 0.449878 0.087802 0.132 Uiso 0.456(12) 1 calc GR . P A 2
 H16F H 0.105617 0.378414 0.143532 0.132 Uiso 0.456(12) 1 calc GR . P A 2
 C17B C 0.2218(10) 0.5631(11) 0.0066(5) 0.043(3) Uani 0.456(12) 1 d D . P A 2
 H17D H 0.232765 0.504326 -0.038006 0.064 Uiso 0.456(12) 1 calc GR . P A 2
 H17E H 0.289281 0.628916 0.011781 0.064 Uiso 0.456(12) 1 calc GR . P A 2
 H17F H 0.151554 0.590359 -0.007898 0.064 Uiso 0.456(12) 1 calc GR . P A 2
 C18 C 0.5876(3) -0.0122(3) 0.2613(2) 0.0286(7) Uani 1 1 d . . . . .
 H18 H 0.669950 0.002042 0.260825 0.034 Uiso 1 1 calc R . . . .
 C19 C 0.5259(4) -0.1224(3) 0.2776(2) 0.0353(9) Uani 1 1 d . . . . .
 H19 H 0.566117 -0.181901 0.286988 0.042 Uiso 1 1 calc R . . . .
 C20 C 0.4080(4) -0.1444(3) 0.2799(3) 0.0348(8) Uani 1 1 d . . . . .
 H20 H 0.365875 -0.218661 0.291884 0.042 Uiso 1 1 calc R . . . .
 C21 C 0.3485(3) -0.0560(3) 0.2643(2) 0.0284(7) Uani 1 1 d . . . . .
 C22 C 0.4152(3) 0.0515(3) 0.24558(19) 0.0221(6) Uani 1 1 d . . . . .
 C23 C 0.3635(3) 0.1463(3) 0.22449(19) 0.0213(6) Uani 1 1 d . . . . .
 C24 C 0.2426(3) 0.1283(3) 0.2292(2) 0.0268(7) Uani 1 1 d . . . . .
 H24 H 0.204706 0.188944 0.218061 0.032 Uiso 1 1 calc R . . . .
 C25 C 0.1774(3) 0.0225(3) 0.2499(2) 0.0323(8) Uani 1 1 d . . . . .
 H25 H 0.095847 0.013608 0.253245 0.039 Uiso 1 1 calc R . . . .
 C26 C 0.2262(4) -0.0700(4) 0.2659(2) 0.0340(8) Uani 1 1 d . . . . .
 H26 H 0.178678 -0.141862 0.277705 0.041 Uiso 1 1 calc R . . . .
 C27 C 0.5285(3) 0.3056(3) 0.3946(2) 0.0223(6) Uani 1 1 d . . . . .
 H27 H 0.453357 0.297719 0.367869 0.027 Uiso 1 1 calc R . . . .
 C28 C 0.5463(3) 0.3437(3) 0.4832(2) 0.0235(7) Uani 1 1 d . . . . .
 C29 C 0.4541(3) 0.3702(3) 0.5293(2) 0.0292(7) Uani 1 1 d . . . . .
 H29 H 0.378733 0.359209 0.502325 0.035 Uiso 1 1 calc R . . . .
 C30 C 0.4738(4) 0.4120(3) 0.6136(2) 0.0331(8) Uani 1 1 d . . . . .
 H30 H 0.411444 0.428491 0.644937 0.040 Uiso 1 1 calc R . . . .
 C31 C 0.5834(4) 0.4302(3) 0.6528(2) 0.0334(9) Uani 1 1 d . . . . .
 H31 H 0.596451 0.461095 0.710556 0.040 Uiso 1 1 calc R . . . .
 C32 C 0.6746(4) 0.4038(3) 0.6088(2) 0.0322(8) Uani 1 1 d . . . . .
 H32 H 0.749910 0.417335 0.636390 0.039 Uiso 1 1 calc R . . . .
 C33 C 0.6567(3) 0.3570(3) 0.5235(2) 0.0241(7) Uani 1 1 d . . . . .
 C34 C 0.7472(3) 0.3221(3) 0.4749(2) 0.0260(7) Uani 1 1 d . . . . .
 C35 C 0.7201(3) 0.2872(3) 0.3877(2) 0.0214(6) Uani 1 1 d . . . . .
 C36 C 0.8060(3) 0.2535(3) 0.3352(2) 0.0236(7) Uani 1 1 d . . . . .
 C37 C 0.9128(3) 0.2510(4) 0.3739(2) 0.0320(8) Uani 1 1 d . . . . .
 H37 H 0.970267 0.228306 0.340148 0.038 Uiso 1 1 calc R . . . .
 C38 C 0.9391(3) 0.2811(4) 0.4618(2) 0.0361(9) Uani 1 1 d . . . . .
 C39 C 0.8560(3) 0.3176(4) 0.5104(2) 0.0334(9) Uani 1 1 d . . . . .
 H39 H 0.873674 0.340086 0.569193 0.040 Uiso 1 1 calc R . . . .
 C40 C 1.0539(4) 0.2699(5) 0.5050(3) 0.0442(11) Uani 1 1 d . . . . .
 C41 C 1.1354(4) 0.2285(6) 0.4416(3) 0.0619(16) Uani 1 1 d . . . . .
 H41A H 1.158841 0.287768 0.402420 0.093 Uiso 1 1 calc GR . . . .
 H41B H 1.094620 0.155315 0.409464 0.093 Uiso 1 1 calc GR . . . .
 H41C H 1.204530 0.216258 0.472419 0.093 Uiso 1 1 calc GR . . . .
 C42 C 1.1142(5) 0.3845(5) 0.5529(4) 0.0637(16) Uani 1 1 d . . . . .
 H42A H 1.188539 0.377142 0.578989 0.096 Uiso 1 1 calc GR . . . .
 H42B H 1.065043 0.405962 0.597164 0.096 Uiso 1 1 calc GR . . . .
 H42C H 1.128205 0.444850 0.513732 0.096 Uiso 1 1 calc GR . . . .
 C43 C 1.0297(5) 0.1777(6) 0.5691(4) 0.0626(15) Uani 1 1 d . . . . .
 H43A H 1.103384 0.170850 0.596568 0.094 Uiso 1 1 calc GR . . . .
 H43B H 0.990445 0.102321 0.539283 0.094 Uiso 1 1 calc GR . . . .
 H43C H 0.979992 0.201538 0.612099 0.094 Uiso 1 1 calc GR . . . .
 C44 C 0.5623(3) 0.1595(3) 0.0446(2) 0.0243(7) Uani 1 1 d . . . . .
 H44 H 0.486872 0.174644 0.048875 0.029 Uiso 1 1 calc R . . . .
 C45 C 0.5938(3) 0.1147(3) -0.0343(2) 0.0299(8) Uani 1 1 d . . . . .
 H45 H 0.539953 0.099927 -0.082270 0.036 Uiso 1 1 calc R . . . .
 C46 C 0.7027(3) 0.0925(3) -0.0414(2) 0.0293(8) Uani 1 1 d . . . . .
 H46 H 0.724446 0.061724 -0.094152 0.035 Uiso 1 1 calc R . . . .
 C47 C 0.7818(3) 0.1158(3) 0.0301(2) 0.0253(7) Uani 1 1 d . . . . .
 C48 C 0.8963(3) 0.0972(3) 0.0277(2) 0.0319(8) Uani 1 1 d . . . . .
 H48 H 0.923762 0.068561 -0.023574 0.038 Uiso 1 1 calc R . . . .
 C49 C 0.9668(3) 0.1216(4) 0.1013(2) 0.0342(9) Uani 1 1 d . . . . .
 H49 H 1.043612 0.109542 0.099602 0.041 Uiso 1 1 calc R . . . .
 C50 C 0.9300(3) 0.1635(3) 0.1786(2) 0.0298(8) Uani 1 1 d . . . . .
 H50 H 0.981655 0.177596 0.227726 0.036 Uiso 1 1 calc R . . . .
 C51 C 0.8187(3) 0.1849(3) 0.1844(2) 0.0225(6) Uani 1 1 d . . . . .
 C52 C 0.7449(12) 0.0205(10) 0.4878(8) 0.062(3) Uani 0.5 1 d . . P . .
 H52A H 0.743033 0.041355 0.429459 0.094 Uiso 0.5 1 calc GR . P . .
 H52B H 0.805077 -0.023635 0.495651 0.094 Uiso 0.5 1 calc GR . P . .
 H52C H 0.762454 0.091606 0.527218 0.094 Uiso 0.5 1 calc GR . P . .
 C53 C 0.6529(10) -0.0373(6) 0.5012(4) 0.100(3) Uani 1 1 d . . . . .
 H53A H 0.655937 -0.062104 0.559067 0.120 Uiso 1 1 calc R . . . .
 H53B H 0.633981 -0.108074 0.460381 0.120 Uiso 1 1 calc R . . . .
 C54 C 0.5580(8) 0.0326(5) 0.4929(3) 0.095(3) Uani 1 1 d . . . . .
 H54A H 0.577888 0.102927 0.534067 0.114 Uiso 1 1 calc R . . . .
 H54B H 0.557417 0.058724 0.435351 0.114 Uiso 1 1 calc R . . . .
 C55 C 0.7450(3) 0.1605(3) 0.1077(2) 0.0212(6) Uani 1 1 d . . . . .
 Fe1 Fe 0.60417(4) 0.23319(4) 0.22778(3) 0.02046(12) Uani 1 1 d . . . . .
 N1 N 0.6335(2) 0.3947(2) 0.20379(16) 0.0210(5) Uani 1 1 d . . . . .
 N2 N 0.4439(2) 0.2403(2) 0.20530(16) 0.0190(5) Uani 1 1 d . . . . .
 N3 N 0.5349(3) 0.0733(3) 0.24637(17) 0.0247(6) Uani 1 1 d . . . . .
 N4 N 0.6116(2) 0.2811(2) 0.34866(16) 0.0193(5) Uani 1 1 d . . . . .
 N5 N 0.7641(2) 0.2248(2) 0.25156(16) 0.0207(5) Uani 1 1 d . . . . .
 N6 N 0.6348(2) 0.1809(2) 0.11288(17) 0.0207(5) Uani 1 1 d . . . . .

loop_
  _atom_site_aniso_label
  _atom_site_aniso_U_11
  _atom_site_aniso_U_22
  _atom_site_aniso_U_33
  _atom_site_aniso_U_23
  _atom_site_aniso_U_13
  _atom_site_aniso_U_12
 C1 0.0245(16) 0.0359(19) 0.0173(14) -0.0027(13) 0.0031(12) 0.0115(14)
 C2 0.0311(18) 0.0316(18) 0.0195(15) -0.0027(13) 0.0066(13) 0.0089(14)
 C3 0.033(2) 0.040(2) 0.0297(19) -0.0045(16) 0.0040(15) 0.0046(17)
 C4 0.039(2) 0.035(2) 0.045(2) -0.0018(18) 0.0079(19) -0.0028(17)
 C5 0.047(3) 0.029(2) 0.051(3) 0.0061(18) 0.015(2) 0.0048(18)
 C6 0.041(2) 0.0299(19) 0.038(2) 0.0068(16) 0.0118(17) 0.0124(16)
 C7 0.0298(17) 0.0273(17) 0.0191(15) -0.0031(12) 0.0063(13) 0.0084(14)
 C8 0.0302(17) 0.0260(16) 0.0152(14) 0.0002(12) 0.0069(12) 0.0101(13)
 C9 0.0268(16) 0.0282(16) 0.0116(13) -0.0031(11) 0.0037(11) 0.0113(13)
 C10 0.0257(16) 0.0264(16) 0.0112(13) -0.0035(11) 0.0021(11) 0.0092(13)
 C11 0.0250(16) 0.0275(17) 0.0194(15) -0.0019(12) -0.0006(12) 0.0087(13)
 C12 0.0317(18) 0.0317(18) 0.0193(15) 0.0001(13) -0.0001(13) 0.0125(15)
 C13 0.0349(19) 0.0269(17) 0.0224(16) 0.0040(13) 0.0032(13) 0.0139(14)
 C14 0.032(2) 0.044(2) 0.033(2) 0.0027(17) -0.0059(16) 0.0164(17)
 C15A 0.055(7) 0.120(12) 0.049(6) -0.030(6) -0.007(5) 0.057(8)
 C16A 0.034(4) 0.053(5) 0.039(5) -0.007(4) -0.010(3) 0.014(4)
 C17A 0.054(7) 0.056(7) 0.164(18) 0.043(9) -0.044(9) 0.009(6)
 C15B 0.051(7) 0.105(11) 0.026(5) -0.006(6) 0.006(4) 0.049(7)
 C16B 0.037(7) 0.054(8) 0.17(2) 0.058(11) -0.032(9) 0.000(6)
 C17B 0.052(6) 0.069(8) 0.019(4) 0.011(4) 0.007(4) 0.037(6)
 C18 0.037(2) 0.0320(18) 0.0214(16) 0.0026(13) 0.0050(14) 0.0161(15)
 C19 0.055(3) 0.0280(19) 0.0282(18) 0.0037(15) 0.0054(17) 0.0206(18)
 C20 0.050(2) 0.0234(18) 0.0317(19) 0.0050(14) 0.0044(17) 0.0089(16)
 C21 0.042(2) 0.0264(17) 0.0172(15) -0.0004(12) 0.0064(14) 0.0081(15)
 C22 0.0291(17) 0.0250(16) 0.0126(13) -0.0027(11) 0.0031(12) 0.0086(13)
 C23 0.0254(16) 0.0247(16) 0.0136(13) -0.0046(11) 0.0025(11) 0.0073(12)
 C24 0.0265(17) 0.0294(18) 0.0248(16) -0.0029(13) 0.0062(13) 0.0087(14)
 C25 0.0296(19) 0.037(2) 0.0286(18) -0.0012(15) 0.0092(14) 0.0044(15)
 C26 0.037(2) 0.0319(19) 0.0301(19) 0.0036(15) 0.0109(16) 0.0001(16)
 C27 0.0250(16) 0.0238(16) 0.0189(14) -0.0031(12) 0.0033(12) 0.0086(13)
 C28 0.0304(17) 0.0231(16) 0.0185(15) -0.0005(12) 0.0081(12) 0.0088(13)
 C29 0.0317(18) 0.0325(19) 0.0246(17) -0.0038(14) 0.0096(14) 0.0112(15)
 C30 0.046(2) 0.035(2) 0.0222(17) -0.0012(14) 0.0183(15) 0.0158(17)
 C31 0.054(2) 0.036(2) 0.0144(15) -0.0040(14) 0.0103(15) 0.0203(18)
 C32 0.044(2) 0.039(2) 0.0167(15) -0.0040(14) 0.0024(14) 0.0181(17)
 C33 0.0330(18) 0.0241(16) 0.0172(14) -0.0020(12) 0.0064(13) 0.0113(14)
 C34 0.0313(18) 0.0322(18) 0.0160(14) -0.0054(13) 0.0026(12) 0.0131(14)
 C35 0.0245(16) 0.0240(15) 0.0171(14) -0.0015(12) 0.0040(12) 0.0095(12)
 C36 0.0274(16) 0.0305(17) 0.0142(13) -0.0052(12) 0.0056(12) 0.0115(13)
 C37 0.0266(18) 0.049(2) 0.0206(16) -0.0102(15) 0.0021(13) 0.0153(16)
 C38 0.033(2) 0.055(3) 0.0214(17) -0.0098(16) -0.0001(14) 0.0181(18)
 C39 0.0327(19) 0.053(2) 0.0155(15) -0.0117(15) -0.0025(13) 0.0177(17)
 C40 0.034(2) 0.070(3) 0.029(2) -0.014(2) -0.0043(16) 0.023(2)
 C41 0.043(3) 0.104(5) 0.043(3) -0.016(3) -0.007(2) 0.038(3)
 C42 0.044(3) 0.073(4) 0.069(4) -0.019(3) -0.021(3) 0.017(3)
 C43 0.063(3) 0.087(4) 0.048(3) 0.008(3) -0.002(2) 0.038(3)
 C44 0.0281(17) 0.0282(17) 0.0173(14) -0.0019(12) 0.0021(12) 0.0092(13)
 C45 0.040(2) 0.0349(19) 0.0165(15) -0.0034(13) 0.0012(14) 0.0138(16)
 C46 0.041(2) 0.0321(18) 0.0151(14) -0.0054(13) 0.0067(14) 0.0116(16)
 C47 0.0312(18) 0.0264(17) 0.0185(15) -0.0031(12) 0.0052(13) 0.0087(14)
 C48 0.036(2) 0.038(2) 0.0229(16) -0.0086(14) 0.0103(14) 0.0136(16)
 C49 0.0288(18) 0.046(2) 0.0282(18) -0.0112(16) 0.0080(14) 0.0149(16)
 C50 0.0259(17) 0.042(2) 0.0227(16) -0.0073(14) 0.0036(13) 0.0138(15)
 C51 0.0242(16) 0.0246(16) 0.0199(15) -0.0020(12) 0.0046(12) 0.0089(13)
 C52 0.082(8) 0.044(6) 0.072(8) 0.021(6) 0.011(6) 0.028(6)
 C53 0.219(11) 0.050(4) 0.040(3) 0.004(3) 0.008(5) 0.049(5)
 C54 0.227(10) 0.037(3) 0.031(3) 0.010(2) 0.024(4) 0.047(4)
 C55 0.0229(15) 0.0222(15) 0.0197(14) 0.0003(12) 0.0064(12) 0.0074(12)
 Fe1 0.0243(2) 0.0243(2) 0.0144(2) -0.00240(16) 0.00360(16) 0.01002(18)
 N1 0.0251(14) 0.0272(14) 0.0114(11) -0.0042(10) 0.0043(10) 0.0092(11)
 N2 0.0224(13) 0.0209(13) 0.0138(11) -0.0013(9) 0.0022(10) 0.0060(10)
 N3 0.0331(16) 0.0310(15) 0.0123(12) -0.0015(10) 0.0025(11) 0.0134(12)
 N4 0.0275(14) 0.0185(12) 0.0134(11) -0.0013(9) 0.0066(10) 0.0089(10)
 N5 0.0237(13) 0.0269(14) 0.0125(11) -0.0046(10) 0.0018(10) 0.0107(11)
 N6 0.0265(14) 0.0190(13) 0.0166(12) 0.0003(10) 0.0031(10) 0.0057(11)

_geom_special_details
;
 All esds (except the esd in the dihedral angle between two l.s. planes)
 are estimated using the full covariance matrix.  The cell esds are taken
 into account individually in the estimation of esds in distances, angles
 and torsion angles; correlations between esds in cell parameters are only
 used when they are defined by crystal symmetry.  An approximate (isotropic)
 treatment of cell esds is used for estimating esds involving l.s. planes.
;
loop_
  _geom_bond_atom_site_label_1
  _geom_bond_atom_site_label_2
  _geom_bond_distance
  _geom_bond_site_symmetry_2
  _geom_bond_publ_flag
 C1 H1 0.9500 . ?
 C1 C2 1.425(5) . ?
 C1 N1 1.309(5) . ?
 C2 C3 1.412(5) . ?
 C2 C7 1.417(5) . ?
 C3 H3 0.9500 . ?
 C3 C4 1.360(6) . ?
 C4 H4 0.9500 . ?
 C4 C5 1.397(7) . ?
 C5 H5 0.9500 . ?
 C5 C6 1.381(6) . ?
 C6 H6 0.9500 . ?
 C6 C7 1.402(5) . ?
 C7 C8 1.457(5) . ?
 C8 C9 1.401(5) . ?
 C8 C13 1.414(5) . ?
 C9 C10 1.435(5) . ?
 C9 N1 1.401(4) . ?
 C10 C11 1.396(4) . ?
 C10 N2 1.371(4) . ?
 C11 H11 0.9500 . ?
 C11 C12 1.401(5) . ?
 C12 C13 1.384(5) . ?
 C12 C14 1.539(5) . ?
 C13 H13 0.9500 . ?
 C14 C15A 1.539(9) . ?
 C14 C16A 1.577(8) . ?
 C14 C17A 1.462(9) . ?
 C14 C15B 1.586(9) . ?
 C14 C16B 1.457(9) . ?
 C14 C17B 1.544(8) . ?
 C15A H15A 0.9800 . ?
 C15A H15B 0.9800 . ?
 C15A H15C 0.9800 . ?
 C16A H16A 0.9800 . ?
 C16A H16B 0.9800 . ?
 C16A H16C 0.9800 . ?
 C17A H17A 0.9800 . ?
 C17A H17B 0.9800 . ?
 C17A H17C 0.9800 . ?
 C15B H15D 0.9800 . ?
 C15B H15E 0.9800 . ?
 C15B H15F 0.9800 . ?
 C16B H16D 0.9800 . ?
 C16B H16E 0.9800 . ?
 C16B H16F 0.9800 . ?
 C17B H17D 0.9800 . ?
 C17B H17E 0.9800 . ?
 C17B H17F 0.9800 . ?
 C18 H18 0.9500 . ?
 C18 C19 1.399(6) . ?
 C18 N3 1.332(4) . ?
 C19 H19 0.9500 . ?
 C19 C20 1.362(6) . ?
 C20 H20 0.9500 . ?
 C20 C21 1.415(5) . ?
 C21 C22 1.404(5) . ?
 C21 C26 1.419(6) . ?
 C22 C23 1.447(5) . ?
 C22 N3 1.380(4) . ?
 C23 C24 1.403(5) . ?
 C23 N2 1.362(4) . ?
 C24 H24 0.9500 . ?
 C24 C25 1.392(5) . ?
 C25 H25 0.9500 . ?
 C25 C26 1.381(6) . ?
 C26 H26 0.9500 . ?
 C27 H27 0.9500 . ?
 C27 C28 1.431(4) . ?
 C27 N4 1.313(4) . ?
 C28 C29 1.412(4) . ?
 C28 C33 1.399(5) . ?
 C29 H29 0.9500 . ?
 C29 C30 1.376(5) . ?
 C30 H30 0.9500 . ?
 C30 C31 1.378(6) . ?
 C31 H31 0.9500 . ?
 C31 C32 1.384(5) . ?
 C32 H32 0.9500 . ?
 C32 C33 1.405(5) . ?
 C33 C34 1.453(4) . ?
 C34 C35 1.412(4) . ?
 C34 C39 1.395(5) . ?
 C35 C36 1.439(4) . ?
 C35 N4 1.385(4) . ?
 C36 C37 1.389(5) . ?
 C36 N5 1.384(4) . ?
 C37 H37 0.9500 . ?
 C37 C38 1.413(5) . ?
 C38 C39 1.390(5) . ?
 C38 C40 1.532(6) . ?
 C39 H39 0.9500 . ?
 C40 C41 1.542(6) . ?
 C40 C42 1.508(7) . ?
 C40 C43 1.546(8) . ?
 C41 H41A 0.9800 . ?
 C41 H41B 0.9800 . ?
 C41 H41C 0.9800 . ?
 C42 H42A 0.9800 . ?
 C42 H42B 0.9800 . ?
 C42 H42C 0.9800 . ?
 C43 H43A 0.9800 . ?
 C43 H43B 0.9800 . ?
 C43 H43C 0.9800 . ?
 C44 H44 0.9500 . ?
 C44 C45 1.412(4) . ?
 C44 N6 1.324(4) . ?
 C45 H45 0.9500 . ?
 C45 C46 1.375(5) . ?
 C46 H46 0.9500 . ?
 C46 C47 1.409(5) . ?
 C47 C48 1.418(5) . ?
 C47 C55 1.419(4) . ?
 C48 H48 0.9500 . ?
 C48 C49 1.377(5) . ?
 C49 H49 0.9500 . ?
 C49 C50 1.403(5) . ?
 C50 H50 0.9500 . ?
 C50 C51 1.397(5) . ?
 C51 C55 1.437(5) . ?
 C51 N5 1.369(4) . ?
 C52 H52A 0.9800 . ?
 C52 H52B 0.9800 . ?
 C52 H52C 0.9800 . ?
 C52 C53 1.189(14) . ?
 C53 H53A 0.9900 . ?
 C53 H53B 0.9900 . ?
 C53 C54 1.540(11) . ?
 C54 C54 1.455(16) 2_656 ?
 C54 H54A 0.9900 . ?
 C54 H54B 0.9900 . ?
 C55 N6 1.379(4) . ?
 Fe1 N1 1.941(3) . ?
 Fe1 N2 1.934(3) . ?
 Fe1 N3 1.943(3) . ?
 Fe1 N4 1.945(3) . ?
 Fe1 N5 1.936(3) . ?
 Fe1 N6 1.947(3) . ?

loop_
  _geom_angle_atom_site_label_1
  _geom_angle_atom_site_label_2
  _geom_angle_atom_site_label_3
  _geom_angle
  _geom_angle_site_symmetry_1
  _geom_angle_site_symmetry_3
  _geom_angle_publ_flag
 C2 C1 H1 118.1 . . ?
 N1 C1 H1 118.1 . . ?
 N1 C1 C2 123.9(3) . . ?
 C3 C2 C1 121.1(3) . . ?
 C3 C2 C7 119.8(4) . . ?
 C7 C2 C1 119.1(3) . . ?
 C2 C3 H3 119.8 . . ?
 C4 C3 C2 120.3(4) . . ?
 C4 C3 H3 119.8 . . ?
 C3 C4 H4 119.6 . . ?
 C3 C4 C5 120.8(4) . . ?
 C5 C4 H4 119.6 . . ?
 C4 C5 H5 120.1 . . ?
 C6 C5 C4 119.8(4) . . ?
 C6 C5 H5 120.1 . . ?
 C5 C6 H6 119.4 . . ?
 C5 C6 C7 121.3(4) . . ?
 C7 C6 H6 119.4 . . ?
 C2 C7 C8 117.4(3) . . ?
 C6 C7 C2 118.1(3) . . ?
 C6 C7 C8 124.5(3) . . ?
 C9 C8 C7 118.1(3) . . ?
 C9 C8 C13 118.5(3) . . ?
 C13 C8 C7 123.3(3) . . ?
 C8 C9 C10 121.8(3) . . ?
 C8 C9 N1 122.8(3) . . ?
 N1 C9 C10 115.4(3) . . ?
 C11 C10 C9 116.9(3) . . ?
 N2 C10 C9 112.7(3) . . ?
 N2 C10 C11 130.4(3) . . ?
 C10 C11 H11 118.9 . . ?
 C10 C11 C12 122.1(3) . . ?
 C12 C11 H11 118.9 . . ?
 C11 C12 C14 119.6(3) . . ?
 C13 C12 C11 119.8(3) . . ?
 C13 C12 C14 120.5(3) . . ?
 C8 C13 H13 119.6 . . ?
 C12 C13 C8 120.8(3) . . ?
 C12 C13 H13 119.6 . . ?
 C12 C14 C16A 107.7(4) . . ?
 C12 C14 C15B 107.5(5) . . ?
 C12 C14 C17B 108.9(5) . . ?
 C15A C14 C12 108.6(4) . . ?
 C15A C14 C16A 104.2(6) . . ?
 C17A C14 C12 115.9(5) . . ?
 C17A C14 C15A 111.1(7) . . ?
 C17A C14 C16A 108.6(6) . . ?
 C16B C14 C12 116.9(5) . . ?
 C16B C14 C15B 107.5(7) . . ?
 C16B C14 C17B 112.8(7) . . ?
 C17B C14 C15B 102.1(6) . . ?
 C14 C15A H15A 109.5 . . ?
 C14 C15A H15B 109.5 . . ?
 C14 C15A H15C 109.5 . . ?
 H15A C15A H15B 109.5 . . ?
 H15A C15A H15C 109.5 . . ?
 H15B C15A H15C 109.5 . . ?
 C14 C16A H16A 109.5 . . ?
 C14 C16A H16B 109.5 . . ?
 C14 C16A H16C 109.5 . . ?
 H16A C16A H16B 109.5 . . ?
 H16A C16A H16C 109.5 . . ?
 H16B C16A H16C 109.5 . . ?
 C14 C17A H17A 109.5 . . ?
 C14 C17A H17B 109.5 . . ?
 C14 C17A H17C 109.5 . . ?
 H17A C17A H17B 109.5 . . ?
 H17A C17A H17C 109.5 . . ?
 H17B C17A H17C 109.5 . . ?
 C14 C15B H15D 109.5 . . ?
 C14 C15B H15E 109.5 . . ?
 C14 C15B H15F 109.5 . . ?
 H15D C15B H15E 109.5 . . ?
 H15D C15B H15F 109.5 . . ?
 H15E C15B H15F 109.5 . . ?
 C14 C16B H16D 109.5 . . ?
 C14 C16B H16E 109.5 . . ?
 C14 C16B H16F 109.5 . . ?
 H16D C16B H16E 109.5 . . ?
 H16D C16B H16F 109.5 . . ?
 H16E C16B H16F 109.5 . . ?
 C14 C17B H17D 109.5 . . ?
 C14 C17B H17E 109.5 . . ?
 C14 C17B H17F 109.5 . . ?
 H17D C17B H17E 109.5 . . ?
 H17D C17B H17F 109.5 . . ?
 H17E C17B H17F 109.5 . . ?
 C19 C18 H18 118.9 . . ?
 N3 C18 H18 118.9 . . ?
 N3 C18 C19 122.2(4) . . ?
 C18 C19 H19 120.0 . . ?
 C20 C19 C18 119.9(4) . . ?
 C20 C19 H19 120.0 . . ?
 C19 C20 H20 120.2 . . ?
 C19 C20 C21 119.7(4) . . ?
 C21 C20 H20 120.2 . . ?
 C20 C21 C26 123.9(4) . . ?
 C22 C21 C20 117.6(4) . . ?
 C22 C21 C26 118.5(3) . . ?
 C21 C22 C23 122.5(3) . . ?
 N3 C22 C21 121.9(3) . . ?
 N3 C22 C23 115.7(3) . . ?
 C24 C23 C22 116.3(3) . . ?
 N2 C23 C22 112.5(3) . . ?
 N2 C23 C24 131.2(3) . . ?
 C23 C24 H24 119.6 . . ?
 C25 C24 C23 120.8(3) . . ?
 C25 C24 H24 119.6 . . ?
 C24 C25 H25 118.6 . . ?
 C26 C25 C24 122.8(4) . . ?
 C26 C25 H25 118.6 . . ?
 C21 C26 H26 120.5 . . ?
 C25 C26 C21 119.0(4) . . ?
 C25 C26 H26 120.5 . . ?
 C28 C27 H27 118.6 . . ?
 N4 C27 H27 118.6 . . ?
 N4 C27 C28 122.8(3) . . ?
 C29 C28 C27 120.4(3) . . ?
 C33 C28 C27 119.5(3) . . ?
 C33 C28 C29 120.1(3) . . ?
 C28 C29 H29 120.1 . . ?
 C30 C29 C28 119.8(4) . . ?
 C30 C29 H29 120.1 . . ?
 C29 C30 H30 119.8 . . ?
 C29 C30 C31 120.4(3) . . ?
 C31 C30 H30 119.8 . . ?
 C30 C31 H31 119.7 . . ?
 C30 C31 C32 120.6(3) . . ?
 C32 C31 H31 119.7 . . ?
 C31 C32 H32 119.8 . . ?
 C31 C32 C33 120.5(4) . . ?
 C33 C32 H32 119.8 . . ?
 C28 C33 C32 118.5(3) . . ?
 C28 C33 C34 118.3(3) . . ?
 C32 C33 C34 123.2(3) . . ?
 C35 C34 C33 117.1(3) . . ?
 C39 C34 C33 123.7(3) . . ?
 C39 C34 C35 119.2(3) . . ?
 C34 C35 C36 120.3(3) . . ?
 N4 C35 C34 123.0(3) . . ?
 N4 C35 C36 116.7(3) . . ?
 C37 C36 C35 117.8(3) . . ?
 N5 C36 C35 111.7(3) . . ?
 N5 C36 C37 130.4(3) . . ?
 C36 C37 H37 118.9 . . ?
 C36 C37 C38 122.3(3) . . ?
 C38 C37 H37 118.9 . . ?
 C37 C38 C40 121.9(3) . . ?
 C39 C38 C37 118.6(3) . . ?
 C39 C38 C40 119.5(3) . . ?
 C34 C39 H39 119.1 . . ?
 C38 C39 C34 121.7(3) . . ?
 C38 C39 H39 119.1 . . ?
 C38 C40 C41 112.3(3) . . ?
 C38 C40 C43 109.8(4) . . ?
 C41 C40 C43 106.4(4) . . ?
 C42 C40 C38 110.0(4) . . ?
 C42 C40 C41 110.1(5) . . ?
 C42 C40 C43 108.1(4) . . ?
 C40 C41 H41A 109.5 . . ?
 C40 C41 H41B 109.5 . . ?
 C40 C41 H41C 109.5 . . ?
 H41A C41 H41B 109.5 . . ?
 H41A C41 H41C 109.5 . . ?
 H41B C41 H41C 109.5 . . ?
 C40 C42 H42A 109.5 . . ?
 C40 C42 H42B 109.5 . . ?
 C40 C42 H42C 109.5 . . ?
 H42A C42 H42B 109.5 . . ?
 H42A C42 H42C 109.5 . . ?
 H42B C42 H42C 109.5 . . ?
 C40 C43 H43A 109.5 . . ?
 C40 C43 H43B 109.5 . . ?
 C40 C43 H43C 109.5 . . ?
 H43A C43 H43B 109.5 . . ?
 H43A C43 H43C 109.5 . . ?
 H43B C43 H43C 109.5 . . ?
 C45 C44 H44 119.1 . . ?
 N6 C44 H44 119.1 . . ?
 N6 C44 C45 121.9(3) . . ?
 C44 C45 H45 120.2 . . ?
 C46 C45 C44 119.7(3) . . ?
 C46 C45 H45 120.2 . . ?
 C45 C46 H46 120.3 . . ?
 C45 C46 C47 119.4(3) . . ?
 C47 C46 H46 120.3 . . ?
 C46 C47 C48 122.9(3) . . ?
 C46 C47 C55 118.3(3) . . ?
 C48 C47 C55 118.8(3) . . ?
 C47 C48 H48 120.7 . . ?
 C49 C48 C47 118.5(3) . . ?
 C49 C48 H48 120.7 . . ?
 C48 C49 H49 118.6 . . ?
 C48 C49 C50 122.8(3) . . ?
 C50 C49 H49 118.6 . . ?
 C49 C50 H50 119.5 . . ?
 C51 C50 C49 121.1(3) . . ?
 C51 C50 H50 119.5 . . ?
 C50 C51 C55 116.4(3) . . ?
 N5 C51 C50 131.6(3) . . ?
 N5 C51 C55 112.0(3) . . ?
 H52A C52 H52B 109.5 . . ?
 H52A C52 H52C 109.5 . . ?
 H52B C52 H52C 109.5 . . ?
 C53 C52 H52A 109.5 . . ?
 C53 C52 H52B 109.5 . . ?
 C53 C52 H52C 109.5 . . ?
 C52 C53 H53A 109.6 . . ?
 C52 C53 H53B 109.6 . . ?
 C52 C53 C54 110.2(7) . . ?
 H53A C53 H53B 108.1 . . ?
 C54 C53 H53A 109.6 . . ?
 C54 C53 H53B 109.6 . . ?
 C53 C54 H54A 108.8 . . ?
 C53 C54 H54B 108.8 . . ?
 C54 C54 C53 113.8(6) 2_656 . ?
 C54 C54 H54A 108.8 2_656 . ?
 C54 C54 H54B 108.8 2_656 . ?
 H54A C54 H54B 107.7 . . ?
 C47 C55 C51 122.3(3) . . ?
 N6 C55 C47 120.8(3) . . ?
 N6 C55 C51 116.8(3) . . ?
 N1 Fe1 N3 165.77(12) . . ?
 N1 Fe1 N4 90.48(11) . . ?
 N1 Fe1 N6 92.18(11) . . ?
 N2 Fe1 N1 82.85(12) . . ?
 N2 Fe1 N3 82.91(12) . . ?
 N2 Fe1 N4 96.39(11) . . ?
 N2 Fe1 N5 179.23(12) . . ?
 N2 Fe1 N6 97.47(11) . . ?
 N3 Fe1 N4 91.02(11) . . ?
 N3 Fe1 N6 89.74(11) . . ?
 N4 Fe1 N6 166.11(12) . . ?
 N5 Fe1 N1 97.72(12) . . ?
 N5 Fe1 N3 96.51(12) . . ?
 N5 Fe1 N4 83.10(11) . . ?
 N5 Fe1 N6 83.03(11) . . ?
 C1 N1 C9 118.4(3) . . ?
 C1 N1 Fe1 128.9(2) . . ?
 C9 N1 Fe1 112.7(2) . . ?
 C10 N2 Fe1 115.7(2) . . ?
 C23 N2 C10 129.0(3) . . ?
 C23 N2 Fe1 115.3(2) . . ?
 C18 N3 C22 118.7(3) . . ?
 C18 N3 Fe1 128.7(3) . . ?
 C22 N3 Fe1 112.6(2) . . ?
 C27 N4 C35 119.1(3) . . ?
 C27 N4 Fe1 128.2(2) . . ?
 C35 N4 Fe1 112.67(19) . . ?
 C36 N5 Fe1 115.8(2) . . ?
 C51 N5 C36 128.4(3) . . ?
 C51 N5 Fe1 115.7(2) . . ?
 C44 N6 C55 119.9(3) . . ?
 C44 N6 Fe1 127.8(2) . . ?
 C55 N6 Fe1 112.3(2) . . ?

_shelx_res_file
;
TITL deh122.res in P-1
    deh122_sq.res
    created by SHELXL-2018/3 at 10:11:38 on 30-May-2019
CELL 0.71073 11.8116 11.8288 15.8752 95.132 92.31 102.631
ZERR 2 0.0011 0.0011 0.0015 0.005 0.005 0.005
LATT 1
SFAC C H Fe N
UNIT 109 99 2 12
SADI C14 C15A C14 C16A C14 C17A C14 C15B C14 C16B C14 C17B
SADI C15A C16A C15A C17A C16A C17A C15B C16B C15B C17B C16B C17B

L.S. 20
PLAN  20
SIZE 0.1 0.2 0.2
TEMP -123.15
BOND $H
fmap 2
acta 50
OMIT -2 1 6
OMIT -1 2 9
OMIT 0 1 6
OMIT 15 -2 1
OMIT 11 3 9
OMIT 12 1 7
OMIT 11 2 10
OMIT -1 -12 5
OMIT 12 1 2
OMIT -15 3 1
OMIT -15 2 0
OMIT 11 2 8
OMIT -11 -9 6
OMIT 15 -1 3
OMIT -16 3 4
OMIT 9 4 16
OMIT 11 1 9
OMIT -1 -15 6
OMIT 8 4 12
OMIT 13 0 3
OMIT 14 -2 3
OMIT 4 -11 10
OMIT 15 0 1
OMIT 12 -1 5
OMIT -2 3 3
OMIT 0 2 6
OMIT 14 -2 2
OMIT 11 1 6
OMIT 0 2 7
OMIT 13 1 4
OMIT -2 2 5
OMIT -1 2 6
OMIT -1 2 8
OMIT 15 -3 1
OMIT 11 3 12
OMIT -16 4 2
OMIT 4 -12 5
OMIT -1 13 10
OMIT 10 3 10
OMIT 11 2 13
OMIT 11 2 6
OMIT 12 1 6
OMIT 11 4 9
OMIT 9 2 9
OMIT -14 2 9
OMIT -2 1 4
OMIT -3 2 6
OMIT -12 -8 7
OMIT -2 2 3
OMIT 0 1 5
OMIT 1 0 1
OMIT -1 2 5
OMIT 15 1 7
OMIT 14 0 0
OMIT 10 2 8
OMIT -3 2 3
OMIT 12 2 8
OMIT -3 3 7
OMIT -2 2 7
OMIT -2 2 8
OMIT -2 3 10
OMIT 12 0 5
OMIT -2 1 7
OMIT -2 2 6
OMIT -2 3 4
OMIT 13 0 0
OMIT -1 2 7
OMIT 9 4 15
OMIT -2 4 6
OMIT -2 2 9
OMIT -1 2 4
OMIT 11 1 14
OMIT -3 3 6
OMIT -3 3 5
OMIT 0 -13 7
OMIT -1 3 6
OMIT -2 2 4
OMIT 2 -13 6
OMIT 10 5 8
OMIT 15 -2 2
OMIT -3 2 7
OMIT 2 0 0
OMIT 1 -4 2
OMIT -1 2 2
OMIT 12 0 3
OMIT 0 -10 15
OMIT 0 -11 12
OMIT -1 2 3
OMIT 5 -13 7
OMIT 16 1 2
OMIT 0 -15 8
OMIT 13 -1 6
OMIT 10 0 11
OMIT -1 1 6
OMIT -3 2 10
OMIT 15 1 6
OMIT -2 4 5
OMIT 8 3 13
OMIT 1 -13 7
OMIT -2 3 11
OMIT 11 5 8
OMIT -4 5 8
OMIT -2 2 10
REM <olex2.extras>
REM <HklSrc "%./deh122_sq.hkl">
REM </olex2.extras>

WGHT    0.017000    8.682302
FVAR       0.14759   0.54429
C1    1    0.731661    0.472775    0.211109    11.00000    0.02454    0.03593 =
         0.01726   -0.00269    0.00309    0.01148
AFIX  43
H1    2    0.798979    0.451164    0.233151    11.00000   -1.20000
AFIX   0
C2    1    0.743595    0.588265    0.187973    11.00000    0.03112    0.03162 =
         0.01952   -0.00274    0.00657    0.00895
C3    1    0.852205    0.668356    0.197395    11.00000    0.03341    0.04039 =
         0.02975   -0.00449    0.00402    0.00464
AFIX  43
H3    2    0.917743    0.646887    0.222556    11.00000   -1.20000
AFIX   0
C4    1    0.863461    0.776066    0.170633    11.00000    0.03902    0.03480 =
         0.04473   -0.00184    0.00793   -0.00282
AFIX  43
H4    2    0.936868    0.829397    0.177513    11.00000   -1.20000
AFIX   0
C5    1    0.768325    0.809193    0.133141    11.00000    0.04697    0.02893 =
         0.05145    0.00613    0.01464    0.00480
AFIX  43
H5    2    0.777330    0.884260    0.113933    11.00000   -1.20000
AFIX   0
C6    1    0.661122    0.732454    0.124090    11.00000    0.04101    0.02989 =
         0.03816    0.00680    0.01182    0.01237
AFIX  43
H6    2    0.596805    0.755460    0.098424    11.00000   -1.20000
AFIX   0
C7    1    0.645373    0.621290    0.152035    11.00000    0.02976    0.02732 =
         0.01914   -0.00308    0.00630    0.00837
C8    1    0.534554    0.536770    0.146773    11.00000    0.03015    0.02596 =
         0.01515    0.00016    0.00690    0.01006
C9    1    0.532916    0.427233    0.174348    11.00000    0.02680    0.02823 =
         0.01158   -0.00310    0.00366    0.01125
C10   1    0.426790    0.340898    0.175392    11.00000    0.02567    0.02637 =
         0.01118   -0.00346    0.00215    0.00921
C11   1    0.324938    0.370283    0.146185    11.00000    0.02505    0.02752 =
         0.01943   -0.00187   -0.00057    0.00874
AFIX  43
H11   2    0.253465    0.314368    0.144868    11.00000   -1.20000
AFIX   0
C12   1    0.324772    0.479582    0.118760    11.00000    0.03170    0.03173 =
         0.01935    0.00014   -0.00012    0.01249
C13   1    0.428257    0.561616    0.118921    11.00000    0.03488    0.02694 =
         0.02238    0.00402    0.00316    0.01392
AFIX  43
H13   2    0.427832    0.635529    0.100079    11.00000   -1.20000
AFIX   0
C14   1    0.208833    0.508963    0.091655    11.00000    0.03245    0.04351 =
         0.03348    0.00269   -0.00589    0.01641
PART 1
C15A  1    0.134386    0.508975    0.168982    21.00000    0.05479    0.11970 =
         0.04936   -0.03035   -0.00742    0.05720
AFIX 137
H15A  2    0.171794    0.572983    0.211398    21.00000   -1.50000
H15B  2    0.126833    0.434755    0.193534    21.00000   -1.50000
H15C  2    0.057112    0.519193    0.151269    21.00000   -1.50000
AFIX   0
C16A  1    0.138618    0.404064    0.028677    21.00000    0.03435    0.05295 =
         0.03922   -0.00722   -0.01048    0.01428
AFIX 137
H16A  2    0.064646    0.421014    0.009718    21.00000   -1.50000
H16B  2    0.123454    0.332973    0.057630    21.00000   -1.50000
H16C  2    0.184131    0.393032   -0.020445    21.00000   -1.50000
AFIX   0
C17A  1    0.217867    0.616352    0.050916    21.00000    0.05364    0.05567 =
         0.16387    0.04295   -0.04368    0.00943
AFIX 137
H17A  2    0.252944    0.683256    0.091696    21.00000   -1.50000
H17B  2    0.140159    0.623203    0.031257    21.00000   -1.50000
H17C  2    0.266555    0.614596    0.002481    21.00000   -1.50000
AFIX   0
PART 0
PART 2
C15B  1    0.192193    0.615103    0.154672   -21.00000    0.05088    0.10477 =
         0.02650   -0.00557    0.00589    0.04924
AFIX 137
H15D  2    0.120641    0.638265    0.137418   -21.00000   -1.50000
H15E  2    0.258701    0.680877    0.153205   -21.00000   -1.50000
H15F  2    0.186955    0.591758    0.212336   -21.00000   -1.50000
AFIX   0
C16B  1    0.104504    0.416576    0.091292   -21.00000    0.03743    0.05416 =
         0.17320    0.05790   -0.03249   -0.00011
AFIX 137
H16D  2    0.102079    0.359287    0.042299   -21.00000   -1.50000
H16E  2    0.035633    0.449878    0.087802   -21.00000   -1.50000
H16F  2    0.105617    0.378414    0.143532   -21.00000   -1.50000
AFIX   0
C17B  1    0.221792    0.563084    0.006616   -21.00000    0.05222    0.06940 =
         0.01853    0.01053    0.00703    0.03674
AFIX 137
H17D  2    0.232765    0.504326   -0.038006   -21.00000   -1.50000
H17E  2    0.289281    0.628916    0.011781   -21.00000   -1.50000
H17F  2    0.151554    0.590359   -0.007898   -21.00000   -1.50000
AFIX   0
PART 0
C18   1    0.587650   -0.012249    0.261268    11.00000    0.03665    0.03200 =
         0.02137    0.00263    0.00504    0.01607
AFIX  43
H18   2    0.669950    0.002042    0.260825    11.00000   -1.20000
AFIX   0
C19   1    0.525878   -0.122432    0.277553    11.00000    0.05538    0.02798 =
         0.02821    0.00368    0.00541    0.02061
AFIX  43
H19   2    0.566117   -0.181901    0.286988    11.00000   -1.20000
AFIX   0
C20   1    0.407966   -0.144363    0.279866    11.00000    0.05017    0.02341 =
         0.03174    0.00498    0.00441    0.00887
AFIX  43
H20   2    0.365875   -0.218661    0.291884    11.00000   -1.20000
AFIX   0
C21   1    0.348520   -0.055959    0.264285    11.00000    0.04167    0.02636 =
         0.01722   -0.00038    0.00637    0.00808
C22   1    0.415211    0.051460    0.245580    11.00000    0.02914    0.02505 =
         0.01255   -0.00272    0.00311    0.00861
C23   1    0.363458    0.146290    0.224487    11.00000    0.02540    0.02466 =
         0.01360   -0.00462    0.00248    0.00729
C24   1    0.242553    0.128279    0.229172    11.00000    0.02653    0.02940 =
         0.02477   -0.00289    0.00616    0.00865
AFIX  43
H24   2    0.204706    0.188944    0.218061    11.00000   -1.20000
AFIX   0
C25   1    0.177401    0.022529    0.249916    11.00000    0.02957    0.03707 =
         0.02862   -0.00118    0.00924    0.00436
AFIX  43
H25   2    0.095847    0.013608    0.253245    11.00000   -1.20000
AFIX   0
C26   1    0.226239   -0.069958    0.265861    11.00000    0.03726    0.03194 =
         0.03015    0.00362    0.01089    0.00012
AFIX  43
H26   2    0.178678   -0.141862    0.277705    11.00000   -1.20000
AFIX   0
C27   1    0.528489    0.305615    0.394587    11.00000    0.02501    0.02380 =
         0.01889   -0.00310    0.00333    0.00862
AFIX  43
H27   2    0.453357    0.297719    0.367869    11.00000   -1.20000
AFIX   0
C28   1    0.546321    0.343748    0.483189    11.00000    0.03041    0.02307 =
         0.01852   -0.00048    0.00810    0.00877
C29   1    0.454127    0.370224    0.529348    11.00000    0.03173    0.03250 =
         0.02455   -0.00379    0.00962    0.01124
AFIX  43
H29   2    0.378733    0.359209    0.502325    11.00000   -1.20000
AFIX   0
C30   1    0.473796    0.412039    0.613610    11.00000    0.04560    0.03534 =
         0.02223   -0.00115    0.01827    0.01582
AFIX  43
H30   2    0.411444    0.428491    0.644937    11.00000   -1.20000
AFIX   0
C31   1    0.583377    0.430175    0.652788    11.00000    0.05371    0.03622 =
         0.01436   -0.00403    0.01032    0.02031
AFIX  43
H31   2    0.596451    0.461095    0.710556    11.00000   -1.20000
AFIX   0
C32   1    0.674621    0.403763    0.608761    11.00000    0.04422    0.03853 =
         0.01670   -0.00403    0.00242    0.01808
AFIX  43
H32   2    0.749910    0.417335    0.636390    11.00000   -1.20000
AFIX   0
C33   1    0.656669    0.357025    0.523499    11.00000    0.03302    0.02411 =
         0.01720   -0.00202    0.00638    0.01131
C34   1    0.747186    0.322122    0.474940    11.00000    0.03132    0.03217 =
         0.01601   -0.00544    0.00260    0.01311
C35   1    0.720064    0.287166    0.387738    11.00000    0.02454    0.02400 =
         0.01714   -0.00146    0.00400    0.00952
C36   1    0.805967    0.253512    0.335179    11.00000    0.02740    0.03049 =
         0.01416   -0.00518    0.00557    0.01147
C37   1    0.912840    0.251003    0.373900    11.00000    0.02665    0.04935 =
         0.02055   -0.01021    0.00208    0.01525
AFIX  43
H37   2    0.970267    0.228306    0.340148    11.00000   -1.20000
AFIX   0
C38   1    0.939072    0.281053    0.461772    11.00000    0.03311    0.05494 =
         0.02143   -0.00982   -0.00015    0.01815
C39   1    0.855954    0.317603    0.510354    11.00000    0.03275    0.05252 =
         0.01553   -0.01171   -0.00250    0.01770
AFIX  43
H39   2    0.873674    0.340086    0.569193    11.00000   -1.20000
AFIX   0
C40   1    1.053878    0.269854    0.505034    11.00000    0.03446    0.06983 =
         0.02935   -0.01432   -0.00428    0.02273
C41   1    1.135394    0.228534    0.441550    11.00000    0.04326    0.10411 =
         0.04327   -0.01563   -0.00723    0.03846
AFIX 137
H41A  2    1.158841    0.287768    0.402420    11.00000   -1.50000
H41B  2    1.094620    0.155315    0.409464    11.00000   -1.50000
H41C  2    1.204530    0.216258    0.472419    11.00000   -1.50000
AFIX   0
C42   1    1.114195    0.384484    0.552920    11.00000    0.04402    0.07258 =
         0.06937   -0.01883   -0.02131    0.01677
AFIX 137
H42A  2    1.188539    0.377142    0.578989    11.00000   -1.50000
H42B  2    1.065043    0.405962    0.597164    11.00000   -1.50000
H42C  2    1.128205    0.444850    0.513732    11.00000   -1.50000
AFIX   0
C43   1    1.029713    0.177708    0.569110    11.00000    0.06270    0.08672 =
         0.04806    0.00765   -0.00174    0.03835
AFIX 137
H43A  2    1.103384    0.170850    0.596568    11.00000   -1.50000
H43B  2    0.990445    0.102321    0.539283    11.00000   -1.50000
H43C  2    0.979992    0.201538    0.612099    11.00000   -1.50000
AFIX   0
C44   1    0.562271    0.159472    0.044619    11.00000    0.02809    0.02815 =
         0.01726   -0.00192    0.00214    0.00920
AFIX  43
H44   2    0.486872    0.174644    0.048875    11.00000   -1.20000
AFIX   0
C45   1    0.593760    0.114671   -0.034322    11.00000    0.03974    0.03493 =
         0.01652   -0.00337    0.00124    0.01376
AFIX  43
H45   2    0.539953    0.099927   -0.082270    11.00000   -1.20000
AFIX   0
C46   1    0.702704    0.092493   -0.041436    11.00000    0.04118    0.03205 =
         0.01508   -0.00539    0.00671    0.01157
AFIX  43
H46   2    0.724446    0.061724   -0.094152    11.00000   -1.20000
AFIX   0
C47   1    0.781803    0.115802    0.030137    11.00000    0.03118    0.02640 =
         0.01854   -0.00314    0.00521    0.00873
C48   1    0.896292    0.097214    0.027690    11.00000    0.03562    0.03829 =
         0.02286   -0.00856    0.01035    0.01362
AFIX  43
H48   2    0.923762    0.068561   -0.023574    11.00000   -1.20000
AFIX   0
C49   1    0.966785    0.121617    0.101267    11.00000    0.02877    0.04647 =
         0.02823   -0.01117    0.00800    0.01490
AFIX  43
H49   2    1.043612    0.109542    0.099602    11.00000   -1.20000
AFIX   0
C50   1    0.930035    0.163536    0.178568    11.00000    0.02591    0.04176 =
         0.02274   -0.00725    0.00359    0.01381
AFIX  43
H50   2    0.981655    0.177596    0.227726    11.00000   -1.20000
AFIX   0
C51   1    0.818731    0.184934    0.184406    11.00000    0.02422    0.02457 =
         0.01988   -0.00202    0.00460    0.00891

C52   1    0.744920    0.020542    0.487799    10.50000    0.08228    0.04355 =
         0.07161    0.02148    0.01124    0.02840
AFIX 137
H52A  2    0.743033    0.041355    0.429459    10.50000   -1.50000
H52B  2    0.805077   -0.023635    0.495651    10.50000   -1.50000
H52C  2    0.762454    0.091606    0.527218    10.50000   -1.50000
AFIX   0
C53   1    0.652936   -0.037338    0.501232    11.00000    0.21933    0.04996 =
         0.04010    0.00430    0.00804    0.04946
AFIX  23
H53A  2    0.655937   -0.062104    0.559067    11.00000   -1.20000
H53B  2    0.633981   -0.108074    0.460381    11.00000   -1.20000
AFIX   0
C54   1    0.557986    0.032589    0.492863    11.00000    0.22672    0.03732 =
         0.03079    0.00974    0.02403    0.04714
AFIX  23
H54A  2    0.577888    0.102927    0.534067    11.00000   -1.20000
H54B  2    0.557417    0.058724    0.435351    11.00000   -1.20000
AFIX   0

C55   1    0.745042    0.160484    0.107732    11.00000    0.02289    0.02219 =
         0.01975    0.00030    0.00644    0.00736
FE1   3    0.604168    0.233186    0.227778    11.00000    0.02426    0.02428 =
         0.01437   -0.00240    0.00360    0.01002
N1    4    0.633452    0.394701    0.203793    11.00000    0.02513    0.02723 =
         0.01140   -0.00422    0.00432    0.00921
N2    4    0.443857    0.240336    0.205303    11.00000    0.02245    0.02092 =
         0.01378   -0.00127    0.00217    0.00598
N3    4    0.534909    0.073273    0.246366    11.00000    0.03307    0.03096 =
         0.01233   -0.00146    0.00248    0.01343
N4    4    0.611584    0.281082    0.348663    11.00000    0.02752    0.01855 =
         0.01336   -0.00132    0.00658    0.00889
N5    4    0.764061    0.224831    0.251556    11.00000    0.02370    0.02693 =
         0.01250   -0.00457    0.00177    0.01067
N6    4    0.634819    0.180940    0.112877    11.00000    0.02654    0.01901 =
         0.01664    0.00030    0.00314    0.00569
HKLF 4


REM  deh122.res in P-1
REM wR2 = 0.2125, GooF = S = 1.141, Restrained GooF = 1.151 for all data
REM R1 = 0.0872 for 8987 Fo > 4sig(Fo) and 0.1334 for all 13227 data
REM 597 parameters refined using 30 restraints

END

WGHT      0.1259      5.3764

REM Highest difference peak  2.310,  deepest hole -1.218,  1-sigma level  0.123
Q1    1   0.6000  0.1677  0.2536  11.00000  0.05    2.31
Q2    1   0.6060  0.2991  0.1996  11.00000  0.05    2.08
Q3    1   0.5327  0.1985  0.2143  11.00000  0.05    2.02
Q4    1   0.6768  0.2721  0.2388  11.00000  0.05    1.95
Q5    1   1.1559  0.3824  0.4263  11.00000  0.05    0.76
Q6    1   0.5244 -0.0566  0.2480  11.00000  0.05    0.70
Q7    1   0.7536  0.2831  0.2173  11.00000  0.05    0.70
Q8    1   0.7820  0.2813  0.5034  11.00000  0.05    0.67
Q9    1   0.6052  0.3528  0.5004  11.00000  0.05    0.64
Q10   1   0.6796  0.3192  0.3597  11.00000  0.05    0.64
Q11   1   0.3822  0.2011  0.2029  11.00000  0.05    0.62
Q12   1   1.0753  0.3456  0.4822  11.00000  0.05    0.62
Q13   1   0.5867  0.3000  0.5115  11.00000  0.05    0.60
Q14   1   0.8191  0.3630  0.4882  11.00000  0.05    0.59
Q15   1   0.2387  0.0649  0.2576  11.00000  0.05    0.59
Q16   1   0.8454  0.2134  0.3608  11.00000  0.05    0.58
Q17   1   0.5213  0.3776  0.6407  11.00000  0.05    0.57
Q18   1   0.4449  0.1769  0.2395  11.00000  0.05    0.57
Q19   1   0.5750  0.3640  0.6806  11.00000  0.05    0.56
Q20   1   0.3603  0.2163  0.1952  11.00000  0.05    0.56
;
_shelx_res_checksum                18182
_shelx_hkl_file
;
   0   2   0  133.08    9.30
   0   2   0  119.53    9.32
   0   2   0  148.59    9.32
   0  -2   0  142.41    9.30
   0  -2   0  141.22    9.30
   0   3   0    5.14    0.43
   0   3   0    4.74    0.41
   0  -3   0    4.64    0.45
   0  -3   0    4.54    0.55
   0   4   0    5.99    0.46
   0   4   0    5.61    0.62
   0   4   0    6.47    0.50
   0   4   0    5.38    0.57
   0   4   0    7.26    0.56
   0   4   0    4.75    0.65
   0   4   0    6.83    0.57
   0  -4   0    6.19    0.58
   0  -4   0    5.27    0.51
   0  -4   0    5.64    0.52
   0   5   0   18.80    1.60
   0   5   0   21.26    1.60
   0   5   0   20.43    1.55
   0   5   0   19.79    1.50
   0   5   0   20.78    1.48
   0   5   0   22.15    1.54
   0   5   0   23.02    1.55
   0   5   0   21.65    1.62
   0  -5   0   19.22    1.59
   0  -5   0   23.21    1.51
   0  -5   0   22.30    1.56
   0   6   0   26.42    1.93
   0   6   0   28.66    1.89
   0   6   0   23.65    1.99
   0   6   0   26.58    1.94
   0   6   0   25.15    1.86
   0   6   0   29.28    1.93
   0   6   0   24.36    1.88
   0  -6   0   29.30    1.95
   0  -6   0   22.99    1.92
   0  -6   0   27.62    1.88
   0  -6   0   29.13    1.92
   0   7   0    0.85    0.39
   0   7   0    0.19    0.33
   0   7   0    0.16    0.37
   0   7   0    0.92    0.24
   0   7   0    1.27    0.24
   0   7   0    0.92    0.42
   0  -7   0    0.92    0.24
   0  -7   0    0.99    0.36
   0   8   0   11.81    1.13
   0   8   0   11.40    0.94
   0   8   0   12.09    1.08
   0   8   0   10.67    1.07
   0   8   0   11.56    1.21
   0   8   0   13.37    0.99
   0  -8   0   12.24    1.09
   0  -8   0   13.61    1.06
   0   9   0    0.54    0.51
   0   9   0    0.08    0.46
   0   9   0    0.03    0.31
   0   9   0    0.42    0.44
   0   9   0    0.82    0.29
   0   9   0   -0.16    0.49
   0  -9   0    0.10    0.47
   0  -9   0    0.14    0.38
   0  10   0    3.35    0.62
   0  10   0    2.83    0.68
   0  10   0    4.36    0.63
   0  10   0    2.15    0.63
   0  10   0    3.41    0.65
   0 -10   0    2.64    0.48
   0 -10   0    2.31    0.50
   0 -10   0    4.74    0.66
   0  11   0    5.46    0.76
   0  11   0    5.53    0.78
   0  11   0    5.75    0.82
   0  11   0    6.20    0.79
   0  11   0    5.67    1.10
   0 -11   0    6.28    0.97
   0  12   0    0.64    0.59
   0  12   0    0.95    0.45
   0  12   0    0.26    0.39
   0  12   0    0.69    0.68
   0  12   0    0.51    0.71
   0 -12   0    0.13    0.53
   0 -12   0    1.01    0.66
   0 -12   0   -0.34    0.49
   0  13   0    0.85    0.71
   0  13   0    0.70    0.50
   0  13   0    2.05    0.77
   0 -13   0    2.25    0.74
   0 -13   0   -0.58    0.81
   0  14   0   -0.43    0.72
   0  14   0    0.71    0.53
   0  14   0   -0.85    0.73
   0 -14   0    0.47    0.81
   0  15   0    0.64    0.59
   0  15   0    1.58    0.85
   0  15   0    0.67    0.87
   0 -15   0    0.79    0.93
   0  16   0    0.80    0.66
   0  16   0   -0.04    0.98
   0  16   0    1.05    1.01
   0 -16   0   -0.50    0.91
   0 -16   0    1.57    0.69
   1 -16   0    1.19    0.98
   1 -16   0    1.39    0.64
  -1  16   0    0.83    0.62
  -1  16   0    2.88    1.04
  -1  16   0    0.81    0.93
   1 -15   0    1.91    0.93
  -1  15   0    1.61    0.95
  -1  15   0    1.25    0.58
  -1  15   0    0.19    0.83
   1 -14   0    5.76    0.95
  -1  14   0    7.17    1.04
  -1  14   0    7.86    0.94
  -1  14   0    4.78    0.94
   1 -13   0    4.68    0.81
  -1  13   0    3.52    0.80
  -1  13   0    5.71    0.79
  -1  13   0    4.57    0.88
   1 -12   0    1.20    0.64
   1 -12   0    0.72    0.50
  -1  12   0    1.53    0.40
  -1  12   0    1.21    0.71
  -1  12   0    0.87    0.63
  -1  12   0    2.53    0.73
  -1  12   0    1.62    0.44
   1 -11   0    9.94    1.24
   1 -11   0   10.23    1.12
  -1  11   0   12.42    1.00
  -1  11   0   12.00    1.03
  -1  11   0   13.72    1.30
  -1  11   0   10.48    1.20
  -1  11   0   10.73    1.32
   1 -10   0    7.37    0.88
   1 -10   0    7.67    1.04
   1 -10   0   10.10    0.97
  -1  10   0    9.80    0.79
  -1  10   0    8.16    0.84
  -1  10   0    7.04    1.01
  -1  10   0    6.33    1.07
  -1  10   0    6.99    1.25
  -1  10   0    7.72    1.08
   1  -9   0   -0.45    0.33
   1  -9   0   -0.37    0.39
   1  -9   0    0.37    0.43
  -1   9   0   -0.10    0.42
  -1   9   0   -0.49    0.51
  -1   9   0   -0.29    0.27
  -1   9   0   -0.84    0.48
  -1   9   0   -0.03    0.27
   1  -8   0    0.96    0.36
   1  -8   0    1.18    0.30
   1  -8   0    0.66    0.38
   1  -8   0    0.69    0.29
  -1   8   0    0.80    0.24
  -1   8   0    0.44    0.45
  -1   8   0    0.11    0.35
  -1   8   0    0.46    0.46
  -1   8   0    0.61    0.38
  -1   8   0    0.60    0.24
   1  -7   0    4.84    0.68
   1  -7   0    4.43    0.47
   1  -7   0    4.13    0.52
   1  -7   0    5.38    0.57
  -1   7   0    3.71    0.76
  -1   7   0    3.83    0.43
  -1   7   0    4.13    0.49
  -1   7   0    4.28    0.48
  -1   7   0    3.85    0.65
  -1   7   0    4.20    0.57
   1  -6   0   31.04    2.51
   1  -6   0   37.27    2.43
   1  -6   0   35.64    2.40
  -1   6   0   36.15    2.40
  -1   6   0   34.11    2.45
  -1   6   0   30.19    2.39
  -1   6   0   36.15    2.46
  -1   6   0   32.98    2.37
  -1   6   0   37.81    2.47
  -1   6   0   34.19    2.51
   1  -5   0   50.23    3.33
   1  -5   0   49.56    3.36
   1  -5   0   49.52    3.31
  -1   5   0   43.39    3.29
  -1   5   0   50.36    3.36
  -1   5   0   49.20    3.31
  -1   5   0   48.91    3.35
  -1   5   0   49.55    3.35
  -1   5   0   48.66    3.39
  -1   5   0   47.90    3.37
  -1   5   0   44.03    3.31
   1  -4   0   -0.09    0.19
   1  -4   0   -0.06    0.19
   1  -4   0    0.05    0.12
  -1   4   0    0.06    0.09
  -1   4   0    0.14    0.18
  -1   4   0   -0.39    0.19
  -1   4   0    0.04    0.12
  -1   4   0   -0.16    0.21
  -1   4   0    0.07    0.12
   1  -3   0   13.94    1.16
   1  -3   0   15.35    1.06
   1  -3   0   15.97    1.06
  -1   3   0   16.78    1.14
  -1   3   0   13.52    1.13
  -1   3   0   14.95    1.06
  -1   3   0   14.81    1.15
   1  -2   0   89.30    5.85
   1  -2   0   81.37    5.85
   1  -2   0   87.87    5.87
   1   1   0  294.11   19.51
  -1  -1   0  280.81   19.50
   1   2   0    0.64    0.19
   1   2   0    0.78    0.17
  -1  -2   0    0.40    0.16
  -1  -2   0    0.59    0.17
   1   3   0   14.82    1.19
   1   3   0   15.39    1.13
   1   3   0   14.13    1.09
   1   3   0   14.37    1.11
   1   3   0   14.55    1.14
   1   3   0   17.25    1.11
   1   3   0   17.91    1.16
  -1  -3   0   14.60    1.13
  -1  -3   0   17.33    1.12
  -1  -3   0   15.47    1.13
   1   4   0    0.03    0.21
   1   4   0    0.34    0.19
   1   4   0    0.35    0.24
   1   4   0   -0.02    0.28
   1   4   0    0.13    0.13
   1   4   0    0.54    0.17
   1   4   0    0.36    0.16
  -1  -4   0   -0.35    0.24
  -1  -4   0    0.12    0.17
  -1  -4   0    0.30    0.17
  -1  -4   0    0.43    0.18
   1   5   0    0.67    0.28
   1   5   0    0.68    0.20
   1   5   0    0.60    0.25
   1   5   0    0.04    0.36
   1   5   0    0.25    0.33
   1   5   0    0.65    0.21
  -1  -5   0   -0.25    0.27
  -1  -5   0    0.55    0.21
  -1  -5   0    0.48    0.22
  -1  -5   0    0.85    0.23
   1   6   0    1.09    0.35
   1   6   0    0.83    0.44
   1   6   0    1.56    0.26
   1   6   0    1.40    0.28
   1   6   0    1.00    0.24
   1   6   0    1.37    0.33
  -1  -6   0    1.49    0.27
  -1  -6   0    1.00    0.26
  -1  -6   0    1.33    0.25
  -1  -6   0    1.06    0.33
   1   7   0   -0.45    0.23
   1   7   0    0.51    0.30
   1   7   0   -0.72    0.40
   1   7   0   -0.56    0.31
   1   7   0   -0.59    0.36
  -1  -7   0   -0.19    0.37
  -1  -7   0   -0.30    0.22
  -1  -7   0   -0.33    0.26
  -1  -7   0   -0.56    0.31
   1   8   0    6.18    0.66
   1   8   0    6.18    0.79
   1   8   0    6.44    0.73
   1   8   0    5.73    0.88
  -1  -8   0    6.65    0.76
  -1  -8   0    7.31    0.76
  -1  -8   0    7.62    0.80
   1   9   0    5.59    0.73
   1   9   0    4.90    0.62
   1   9   0    3.47    0.67
   1   9   0    4.67    0.62
   1   9   0    5.07    0.71
  -1  -9   0    4.97    0.63
  -1  -9   0    4.91    0.77
   1  10   0    6.93    1.01
   1  10   0    6.68    1.09
   1  10   0    6.20    0.79
   1  10   0    4.10    0.79
  -1 -10   0    5.66    0.90
  -1 -10   0    7.66    1.09
   1  11   0    0.22    0.41
   1  11   0    0.34    0.63
   1  11   0    0.12    0.55
   1  11   0   -0.18    0.36
   1  11   0   -0.69    0.60
  -1 -11   0   -0.51    0.50
  -1 -11   0    0.86    0.62
   1  12   0    0.89    0.48
   1  12   0    0.83    0.61
   1  12   0    0.99    0.72
   1  12   0    0.33    0.73
   1  12   0    0.69    0.41
  -1 -12   0   -0.40    0.51
  -1 -12   0    1.14    0.61
   1  13   0    0.28    0.72
   1  13   0    0.20    0.71
   1  13   0   -0.16    0.51
  -1 -13   0    0.75    0.74
   1  14   0   -0.39    0.58
   1  14   0    0.66    0.74
   1  14   0    0.28    0.83
  -1 -14   0   -0.14    0.82
   1  15   0    0.88    0.64
   1  15   0    0.91    0.98
   1  15   0    0.43    0.82
  -1 -15   0    0.23    0.88
   1  16   0    1.83    0.74
   1  16   0    1.71    1.07
   1  16   0    2.22    1.05
  -1 -16   0    1.25    0.73
  -1 -16   0    1.33    1.06
   2 -16   0    0.39    1.02
   2 -16   0    0.74    0.63
  -2  16   0    0.33    0.93
  -2  16   0    0.27    0.57
  -2  16   0    0.86    0.95
   2 -15   0    0.42    0.82
  -2  15   0    1.00    0.87
  -2  15   0    0.23    0.50
  -2  15   0   -0.20    0.80
   2 -14   0    4.37    0.87
  -2  14   0    6.07    0.80
  -2  14   0    3.51    0.86
   2 -13   0    0.30    0.54
   2 -13   0    0.11    0.64
  -2  13   0    0.40    1.16
  -2  13   0   -0.47    0.73
  -2  13   0    0.16    0.64
  -2  13   0    0.36    0.43
  -2  13   0    0.20    0.40
   2 -12   0   -0.37    0.56
   2 -12   0    0.81    0.47
   2 -12   0    1.46    0.67
  -2  12   0    1.07    0.60
  -2  12   0    1.24    0.76
  -2  12   0    0.76    0.36
  -2  12   0    2.34    0.74
  -2  12   0    2.25    0.40
  -2  12   0    0.94    0.43
   2 -11   0    0.93    0.41
   2 -11   0    1.17    0.54
   2 -11   0    2.37    1.13
  -2  11   0    1.69    0.31
  -2  11   0    1.86    0.36
  -2  11   0    1.70    0.66
  -2  11   0    3.08    0.72
  -2  11   0    2.84    0.60
   2 -10   0    0.62    0.35
   2 -10   0    1.17    0.51
   2 -10   0    0.98    0.48
  -2  10   0    0.57    0.31
  -2  10   0    0.63    0.62
  -2  10   0    0.15    0.57
  -2  10   0    0.89    0.52
  -2  10   0    0.77    0.49
  -2  10   0    0.91    0.29
  -2  10   0    1.04    0.28
   2  -9   0   -0.63    0.30
   2  -9   0   -0.04    0.41
   2  -9   0    0.37    0.39
  -2   9   0   -0.08    0.24
  -2   9   0    0.05    0.25
  -2   9   0   -0.01    0.51
  -2   9   0   -0.23    0.43
  -2   9   0    0.01    0.24
  -2   9   0   -0.24    0.40
  -2   9   0   -0.47    0.48
   2  -8   0    1.94    0.40
   2  -8   0    1.67    0.30
   2  -8   0    1.85    0.28
   2  -8   0    1.64    0.40
  -2   8   0    0.99    0.42
  -2   8   0    1.81    0.27
  -2   8   0    1.01    0.38
  -2   8   0    1.52    0.26
  -2   8   0    1.77    0.49
  -2   8   0    1.42    0.47
  -2   8   0    2.18    0.25
   2  -7   0   -0.08    0.22
   2  -7   0   -0.21    0.17
   2  -7   0   -0.15    0.30
   2  -7   0   -0.06    0.29
  -2   7   0    0.04    0.21
  -2   7   0   -0.06    0.18
  -2   7   0   -0.64    0.39
  -2   7   0   -0.21    0.30
  -2   7   0   -0.06    0.16
   2  -6   0    0.77    0.33
   2  -6   0    1.53    0.20
   2  -6   0    2.44    0.36
   2  -6   0    1.06    0.31
  -2   6   0    1.02    0.32
  -2   6   0    1.76    0.18
  -2   6   0    1.47    0.21
  -2   6   0    1.59    0.42
  -2   6   0    1.31    0.21
  -2   6   0    1.51    0.24
  -2   6   0    1.20    0.36
   2  -5   0   12.99    1.00
   2  -5   0   15.55    0.99
   2  -5   0   14.54    1.03
  -2   5   0   13.85    1.06
  -2   5   0   13.80    1.12
  -2   5   0   12.74    1.03
  -2   5   0   13.34    0.99
  -2   5   0   14.67    1.15
  -2   5   0   14.61    0.99
  -2   5   0   13.17    0.96
  -2   5   0   13.87    1.14
   2  -4   0   41.47    3.19
   2  -4   0   49.22    3.19
   2  -4   0   43.53    3.24
  -2   4   0   44.26    3.25
  -2   4   0   54.34    3.23
  -2   4   0   48.65    3.19
  -2   4   0   44.59    3.24
  -2   4   0   48.33    3.24
  -2   4   0   49.05    3.30
  -2   4   0   44.39    3.19
   2  -3   0    2.81    0.45
   2  -3   0    1.90    0.22
   2  -3   0    2.05    0.24
  -2   3   0    2.35    0.31
  -2   3   0    1.80    0.27
  -2   3   0    2.16    0.23
  -2   3   0    3.04    0.35
  -2   3   0    2.19    0.32
  -2   3   0    1.90    0.23
   2  -2   0   20.70    1.57
   2  -2   0   22.27    1.51
   2  -2   0   22.28    1.51
  -2   2   0   22.37    1.51
  -2   2   0   22.12    1.51
   2  -1   0  184.02   11.34
   2  -1   0  149.92   11.27
   2  -1   0  163.90   11.25
   2   0   0    1.86    0.22
  -2   0   0    1.46    0.32
  -2   0   0    1.75    0.22
   2   1   0   95.74    6.50
   2   1   0   80.02    6.50
   2   1   0   95.47    6.51
   2   1   0   96.31    6.52
  -2  -1   0  100.68    6.52
  -2  -1   0   99.19    6.50
  -2  -1   0  101.45    6.51
   2   2   0    0.87    0.27
   2   2   0    1.08    0.22
   2   2   0    1.42    0.19
   2   2   0    1.59    0.21
   2   2   0    1.92    0.32
  -2  -2   0    1.56    0.20
  -2  -2   0    1.16    0.22
  -2  -2   0    1.60    0.21
  -2  -2   0    1.27    0.23
   2   3   0    4.97    0.46
   2   3   0    5.16    0.46
   2   3   0    5.80    0.47
   2   3   0    5.10    0.50
   2   3   0    5.20    0.51
   2   3   0    4.14    0.55
   2   3   0    4.48    0.43
   2   3   0    4.04    0.48
  -2  -3   0    3.70    0.55
  -2  -3   0    5.55    0.47
   2   4   0   18.94    1.41
   2   4   0   17.66    1.37
   2   4   0   17.75    1.34
   2   4   0   20.38    1.38
   2   4   0   18.03    1.39
   2   4   0   16.54    1.44
   2   4   0   18.83    1.42
   2   4   0   18.56    1.37
  -2  -4   0   17.86    1.38
  -2  -4   0   21.70    1.39
  -2  -4   0   20.41    1.39
  -2  -4   0   21.02    1.38
   2   5   0   11.24    0.94
   2   5   0   11.62    1.01
   2   5   0   11.81    1.04
   2   5   0   11.21    0.92
   2   5   0   10.50    1.08
   2   5   0   12.70    0.97
   2   5   0   12.37    0.96
   2   5   0   13.00    1.00
  -2  -5   0   13.37    0.97
  -2  -5   0   11.83    1.00
  -2  -5   0   14.21    1.00
  -2  -5   0   11.81    0.96
   2   6   0   26.94    1.89
   2   6   0   28.27    1.90
   2   6   0   24.17    1.98
   2   6   0   23.46    1.88
   2   6   0   25.43    1.92
   2   6   0   25.53    1.85
   2   6   0   25.52    1.95
   2   6   0   25.66    1.88
  -2  -6   0   28.41    1.92
  -2  -6   0   27.58    1.90
  -2  -6   0   27.01    1.88
  -2  -6   0   26.28    1.89
   2   7   0   10.67    1.05
   2   7   0   11.30    1.02
   2   7   0   10.94    0.91
   2   7   0   10.46    1.13
   2   7   0   12.51    0.99
   2   7   0   11.79    0.97
  -2  -7   0    9.01    0.99
  -2  -7   0   11.84    0.95
  -2  -7   0   11.27    0.96
   2   8   0   -0.38    0.49
   2   8   0   -0.03    0.50
   2   8   0   -0.48    0.48
   2   8   0   -0.28    0.41
   2   8   0    0.54    0.40
   2   8   0   -0.18    0.32
  -2  -8   0    0.33    0.47
  -2  -8   0    0.78    0.34
  -2  -8   0    0.36    0.33
   2   9   0    5.99    0.88
   2   9   0    6.94    0.84
   2   9   0    6.54    0.78
   2   9   0    6.12    0.99
  -2  -9   0    6.39    0.90
  -2  -9   0    6.96    0.93
  -2  -9   0    6.88    0.90
   2  10   0   26.20    2.36
   2  10   0   25.23    2.16
   2  10   0   27.77    2.13
   2  10   0   24.22    2.00
  -2 -10   0   29.53    2.12
  -2 -10   0   29.02    2.07
   2  11   0    0.00    0.54
   2  11   0   -0.77    0.42
   2  11   0   -0.28    0.63
   2  11   0    0.37    0.64
  -2 -11   0    0.63    0.66
  -2 -11   0   -0.43    0.45
   2  12   0    2.92    0.84
   2  12   0    2.05    0.65
   2  12   0    2.87    0.56
   2  12   0    2.33    0.73
  -2 -12   0    2.86    0.76
  -2 -12   0    1.46    0.56
   2  13   0   -0.52    0.52
   2  13   0   -0.07    0.74
   2  13   0    0.41    0.68
  -2 -13   0   -0.09    0.78
   2  14   0   -0.36    0.81
   2  14   0   -0.07    0.61
   2  14   0    0.14    0.75
  -2 -14   0   -0.13    0.79
   2  15   0    1.43    0.94
   2  15   0    2.14    0.72
   2  15   0    2.17    1.03
  -2 -15   0    1.68    0.95
   3 -16   0   -0.18    0.56
   3 -16   0    1.81    0.98
  -3  16   0   -0.62    1.07
  -3  16   0   -0.07    0.57
   3 -15   0   -0.27    0.85
   3 -15   0   -0.64    0.51
  -3  15   0   -0.34    0.75
  -3  15   0   -0.02    0.48
  -3  15   0    0.66    0.88
   3 -14   0    1.04    0.75
  -3  14   0    0.17    0.78
  -3  14   0    0.65    0.45
  -3  14   0    0.29    0.70
   3 -13   0   -0.45    0.64
   3 -13   0    0.36    0.47
  -3  13   0    1.57    0.76
  -3  13   0    0.69    0.62
  -3  13   0    1.37    1.18
  -3  13   0   -0.23    0.39
   3 -12   0   -0.45    0.57
   3 -12   0    0.60    0.61
   3 -12   0    0.45    0.41
  -3  12   0    0.76    0.36
  -3  12   0    0.03    0.31
  -3  12   0    0.50    0.57
  -3  12   0    0.16    0.69
  -3  12   0    0.92    0.72
  -3  12   0   -0.11    0.40
   3 -11   0    3.54    0.50
   3 -11   0    5.66    0.83
   3 -11   0    3.66    0.68
  -3  11   0    4.55    0.59
  -3  11   0    5.50    0.81
  -3  11   0    5.23    0.58
  -3  11   0    4.30    0.79
  -3  11   0    3.71    1.12
  -3  11   0    4.86    0.65
  -3  11   0    5.12    0.70
   3 -10   0   11.56    1.20
   3 -10   0   10.66    0.99
   3 -10   0   10.42    0.99
   3 -10   0    8.99    0.90
  -3  10   0    8.24    1.05
  -3  10   0    9.90    1.15
  -3  10   0    9.75    1.29
  -3  10   0   10.33    0.85
  -3  10   0    9.79    0.81
  -3  10   0    8.85    0.85
  -3  10   0    8.84    1.15
   3  -9   0    6.28    0.76
   3  -9   0    5.88    0.75
   3  -9   0    7.66    0.66
   3  -9   0    6.90    0.95
   3  -9   0    5.75    0.68
  -3   9   0    6.17    0.57
  -3   9   0    4.85    0.97
  -3   9   0    6.34    0.66
  -3   9   0    6.18    0.83
  -3   9   0    5.87    0.61
  -3   9   0    7.09    0.62
  -3   9   0    5.54    1.03
  -3   9   0    6.52    0.92
   3  -8   0    5.92    0.59
   3  -8   0    6.79    0.90
   3  -8   0    5.81    0.66
   3  -8   0    5.99    0.59
  -3   8   0    5.82    0.50
  -3   8   0    5.63    0.58
  -3   8   0    5.18    0.87
  -3   8   0    5.42    0.85
  -3   8   0    4.83    0.72
  -3   8   0    6.20    0.55
  -3   8   0    5.49    0.88
   3  -7   0    7.63    0.66
   3  -7   0    7.51    0.63
   3  -7   0    7.82    0.86
   3  -7   0    7.85    0.71
  -3   7   0    7.89    0.66
  -3   7   0    7.32    0.59
  -3   7   0    7.50    0.88
  -3   7   0    8.72    0.67
  -3   7   0    8.38    0.61
  -3   7   0    7.75    0.77
  -3   7   0    8.11    0.63
  -3   7   0    7.31    0.90
  -3   7   0    8.36    0.84
   3  -6   0    0.83    0.16
   3  -6   0    0.15    0.29
   3  -6   0    0.80    0.18
  -3   6   0    0.46    0.47
  -3   6   0    0.81    0.24
  -3   6   0    0.21    0.29
  -3   6   0    0.75    0.23
  -3   6   0    0.72    0.31
  -3   6   0    0.80    0.12
  -3   6   0    0.84    0.18
  -3   6   0    0.82    0.16
  -3   6   0    0.28    0.37
  -3   6   0    1.10    0.13
   3  -5   0    0.14    0.26
   3  -5   0    0.31    0.14
   3  -5   0    0.41    0.13
  -3   5   0    0.44    0.26
  -3   5   0    0.05    0.34
  -3   5   0    0.23    0.32
  -3   5   0    0.59    0.21
  -3   5   0    0.34    0.14
  -3   5   0    0.51    0.21
  -3   5   0    0.50    0.28
   3  -4   0   12.12    0.97
   3  -4   0   11.47    0.92
   3  -4   0   11.05    0.79
  -3   4   0   11.57    0.84
  -3   4   0   11.52    0.85
  -3   4   0   10.15    0.79
  -3   4   0    9.22    0.87
  -3   4   0   13.12    0.87
   3  -3   0    6.84    0.64
   3  -3   0    5.45    0.56
   3  -3   0    5.77    0.45
   3  -3   0    7.15    0.56
   3  -3   0    5.71    0.45
  -3   3   0    5.83    0.53
  -3   3   0    5.49    0.54
  -3   3   0    5.89    0.54
  -3   3   0    5.99    0.44
   3  -2   0   75.14    5.49
   3  -2   0   92.45    5.52
   3  -2   0   71.67    5.46
   3  -2   0   78.47    5.47
   3  -2   0   77.28    5.46
  -3   2   0   92.41    5.46
  -3   2   0   74.91    5.48
   3  -1   0   -0.05    0.13
   3  -1   0   -0.11    0.22
  -3   1   0   -0.30    0.23
  -3   1   0   -0.20    0.27
  -3   1   0    0.20    0.13
  -3   1   0   -0.08    0.22
   3   0   0   12.80    0.99
   3   0   0   13.30    1.06
   3   0   0   12.80    1.00
   3   0   0   16.04    1.07
   3   0   0   12.65    1.07
  -3   0   0   15.67    1.00
   3   1   0   37.96    2.68
   3   1   0   41.23    2.66
   3   1   0   41.72    2.65
   3   1   0   35.47    2.65
   3   1   0   37.44    2.67
  -3  -1   0   37.28    2.65
   3   2   0    9.25    0.72
   3   2   0    9.72    0.74
   3   2   0    8.06    0.72
   3   2   0    9.61    0.76
   3   2   0    9.96    0.76
   3   2   0    8.93    0.70
  -3  -2   0    7.80    0.73
   3   3   0   11.81    0.92
   3   3   0   12.44    0.98
   3   3   0   11.83    0.99
   3   3   0   11.99    0.94
   3   3   0   12.35    0.93
   3   3   0   12.35    0.97
   3   3   0   12.35    0.94
  -3  -3   0   14.76    0.95
  -3  -3   0   13.80    0.96
  -3  -3   0   12.57    0.95
  -3  -3   0   10.81    0.91
  -3  -3   0   11.47    0.99
   3   4   0    8.85    0.76
   3   4   0    9.00    0.80
   3   4   0    9.80    0.79
   3   4   0    8.88    0.85
   3   4   0   10.15    0.85
   3   4   0    9.61    0.88
   3   4   0    9.41    0.79
   3   4   0    9.22    0.89
  -3  -4   0    8.80    0.75
  -3  -4   0    9.80    0.81
  -3  -4   0    9.79    0.83
  -3  -4   0   10.68    0.80
   3   5   0    3.27    0.48
   3   5   0    3.07    0.46
   3   5   0    1.75    0.34
   3   5   0    2.27    0.39
   3   5   0    2.58    0.35
   3   5   0    2.80    0.33
   3   5   0    2.02    0.32
   3   5   0    2.55    0.33
  -3  -5   0    2.29    0.33
  -3  -5   0    3.12    0.44
  -3  -5   0    2.92    0.52
  -3  -5   0    2.52    0.31
  -3  -5   0    2.43    0.33
   3   6   0    3.76    0.38
   3   6   0    2.50    0.36
   3   6   0    3.73    0.52
   3   6   0    3.11    0.51
   3   6   0    3.45    0.54
   3   6   0    2.33    0.37
   3   6   0    2.52    0.43
  -3  -6   0    3.29    0.49
  -3  -6   0    3.06    0.39
  -3  -6   0    2.82    0.36
  -3  -6   0    2.78    0.42
   3   7   0    4.13    0.78
   3   7   0    5.00    0.60
   3   7   0    5.30    0.67
   3   7   0    4.34    0.65
   3   7   0    3.70    0.59
   3   7   0    4.85    0.64
  -3  -7   0    5.34    0.74
  -3  -7   0    4.74    0.51
  -3  -7   0    4.27    0.69
  -3  -7   0    5.57    0.67
  -3  -7   0    5.57    0.64
   3   8   0    4.43    0.57
   3   8   0    4.10    0.49
   3   8   0    4.39    0.68
   3   8   0    3.98    0.50
   3   8   0    4.33    0.69
   3   8   0    3.22    0.62
  -3  -8   0    4.26    0.61
  -3  -8   0    4.80    0.50
  -3  -8   0    4.80    0.75
  -3  -8   0    2.94    0.51
   3   9   0    8.02    0.85
   3   9   0    7.88    0.92
   3   9   0    7.71    1.09
   3   9   0    7.04    1.08
   3   9   0    5.77    1.26
   3   9   0    8.58    0.98
  -3  -9   0    8.57    1.17
  -3  -9   0    9.23    1.00
  -3  -9   0    8.11    0.71
  -3  -9   0    8.13    0.96
   3  10   0    1.44    0.44
   3  10   0    2.05    0.69
   3  10   0    1.21    0.94
   3  10   0    2.43    0.69
   3  10   0    2.28    0.46
   3  10   0    1.45    0.63
  -3 -10   0    3.07    0.59
  -3 -10   0    1.63    0.64
  -3 -10   0    1.29    0.45
   3  11   0   -0.59    0.68
   3  11   0   -0.68    0.48
   3  11   0   -0.05    0.56
   3  11   0   -0.10    0.50
   3  11   0   -0.48    0.69
  -3 -11   0   -0.43    0.59
  -3 -11   0   -0.51    0.44
   3  12   0    0.83    0.76
   3  12   0   -0.30    0.52
   3  12   0    0.81    0.64
   3  12   0    0.82    0.80
  -3 -12   0    0.26    0.75
   3  13   0    0.16    0.67
   3  13   0   -0.50    0.57
   3  13   0   -0.87    0.74
  -3 -13   0    1.20    0.74
   3  14   0    1.91    0.71
   3  14   0    1.40    0.87
   3  14   0    1.56    0.83
  -3 -14   0    2.15    0.94
   3  15   0    0.88    0.72
   3  15   0   -0.52    0.89
   3  15   0   -0.57    0.90
  -3 -15   0   -0.46    0.96
   4 -16   0   -0.97    0.91
   4 -16   0   -0.31    0.60
  -4  16   0   -1.03    0.53
  -4  16   0   -0.30    1.08
   4 -15   0    1.33    0.80
   4 -15   0    0.71    0.51
  -4  15   0    2.94    1.03
  -4  15   0    1.33    0.49
  -4  15   0    0.72    0.79
   4 -14   0    1.47    0.73
   4 -14   0    1.76    0.47
  -4  14   0    1.09    0.91
  -4  14   0    1.21    0.42
  -4  14   0    1.01    0.71
   4 -13   0    2.90    0.79
   4 -13   0    3.88    0.78
  -4  13   0    4.26    0.51
  -4  13   0    6.04    0.92
  -4  13   0    3.42    0.52
  -4  13   0    4.06    0.80
   4 -12   0    1.17    0.61
   4 -12   0    1.50    0.62
   4 -12   0    1.02    0.41
   4 -12   0    1.06    0.36
  -4  12   0    1.01    0.35
  -4  12   0    0.82    0.72
  -4  12   0    0.68    0.59
  -4  12   0    0.55    0.70
  -4  12   0    1.27    0.33
  -4  12   0    1.22    0.40
   4 -11   0    0.52    0.59
   4 -11   0   -0.14    0.54
   4 -11   0    0.03    0.29
   4 -11   0    0.14    0.33
   4 -11   0   -0.10    0.32
  -4  11   0   -0.22    0.29
  -4  11   0    0.52    0.52
  -4  11   0    0.27    0.63
  -4  11   0   -0.51    0.69
  -4  11   0    0.69    0.35
  -4  11   0    0.18    0.61
  -4  11   0    0.32    0.28
   4 -10   0    8.06    1.16
   4 -10   0    6.58    0.70
   4 -10   0    7.54    0.84
   4 -10   0    7.39    0.65
   4 -10   0    6.18    0.73
  -4  10   0    7.00    0.75
  -4  10   0    9.29    1.02
  -4  10   0    7.25    0.90
  -4  10   0    6.10    0.68
  -4  10   0    6.02    1.05
  -4  10   0    7.36    0.63
  -4  10   0    6.17    1.13
   4  -9   0   -0.02    0.43
   4  -9   0   -0.51    0.46
   4  -9   0   -0.32    0.24
  -4   9   0   -0.33    0.20
  -4   9   0   -0.35    0.20
  -4   9   0   -0.49    0.48
  -4   9   0    0.24    0.30
  -4   9   0   -0.69    0.41
  -4   9   0   -0.47    0.42
  -4   9   0   -0.48    0.52
  -4   9   0   -0.16    0.22
  -4   9   0   -0.05    0.30
   4  -8   0   17.63    1.29
   4  -8   0   18.74    1.28
   4  -8   0   20.03    1.36
   4  -8   0   18.19    1.53
  -4   8   0   17.75    1.32
  -4   8   0   17.03    1.26
  -4   8   0   15.77    1.24
  -4   8   0   16.90    1.53
  -4   8   0   15.45    1.44
  -4   8   0   16.71    1.39
  -4   8   0   18.60    1.25
  -4   8   0   17.67    1.51
  -4   8   0   19.11    1.30
   4  -7   0    5.38    0.88
   4  -7   0    5.85    0.62
  -4   7   0    5.66    0.44
  -4   7   0    5.33    0.56
  -4   7   0    5.42    0.55
  -4   7   0    5.66    0.83
  -4   7   0    7.11    0.74
  -4   7   0    6.39    0.45
  -4   7   0    5.17    0.69
  -4   7   0    5.91    0.49
   4  -6   0    1.99    0.40
  -4   6   0    2.62    0.39
  -4   6   0    3.38    0.66
  -4   6   0    2.99    0.39
  -4   6   0    3.68    0.45
  -4   6   0    2.93    0.44
   4  -5   0   14.37    1.21
   4  -5   0   13.41    1.24
  -4   5   0   13.92    1.10
  -4   5   0   16.92    1.12
  -4   5   0   15.26    1.09
  -4   5   0   16.19    1.15
  -4   5   0   15.30    1.18
   4  -4   0   60.70    4.30
   4  -4   0   62.05    4.29
   4  -4   0   61.20    4.27
   4  -4   0   62.80    4.22
  -4   4   0   63.34    4.27
  -4   4   0   60.70    4.22
  -4   4   0   62.70    4.25
   4  -3   0   18.96    1.24
   4  -3   0   16.86    1.30
   4  -3   0   17.09    1.27
   4  -3   0   17.15    1.19
   4  -3   0   17.14    1.17
   4  -3   0   16.24    1.19
  -4   3   0   15.45    1.24
  -4   3   0   16.77    1.23
  -4   3   0   19.16    1.19
  -4   3   0   15.69    1.19
   4  -2   0   32.20    2.21
   4  -2   0   31.63    2.20
   4  -2   0   32.58    2.21
   4  -2   0   32.83    2.25
   4  -2   0   31.05    2.19
  -4   2   0   33.60    2.24
  -4   2   0   30.66    2.19
   4  -1   0   26.17    1.80
   4  -1   0   24.88    1.75
   4  -1   0   25.31    1.80
   4  -1   0   25.84    1.77
   4  -1   0   26.59    1.80
  -4   1   0   24.22    1.75
   4   0   0   58.26    3.76
   4   0   0   55.19    3.77
   4   0   0   54.71    3.79
   4   0   0   52.90    3.79
   4   0   0   55.30    3.77
  -4   0   0   53.75    3.84
   4   1   0    7.54    0.66
   4   1   0    7.77    0.65
   4   1   0    6.70    0.63
   4   1   0    8.94    0.63
   4   1   0    8.70    0.71
   4   1   0    7.73    0.71
  -4  -1   0    8.90    0.67
  -4  -1   0    8.99    0.64
  -4  -1   0    7.94    0.68
   4   2   0   37.34    2.84
   4   2   0   40.14    2.82
   4   2   0   39.29    2.86
   4   2   0   39.25    2.85
   4   2   0   39.59    2.84
   4   2   0   39.30    2.87
  -4  -2   0   41.17    2.84
  -4  -2   0   46.38    2.85
  -4  -2   0   38.09    2.85
  -4  -2   0   45.03    2.83
  -4  -2   0   45.74    2.85
   4   3   0    6.75    0.83
   4   3   0    7.45    0.77
   4   3   0    7.39    0.62
   4   3   0    6.35    0.63
   4   3   0    7.28    0.66
   4   3   0    6.88    0.68
   4   3   0    6.89    0.63
   4   3   0    5.62    0.72
  -4  -3   0    7.03    0.68
  -4  -3   0    8.69    1.00
  -4  -3   0    8.20    0.68
  -4  -3   0    6.60    0.69
  -4  -3   0    7.69    0.63
  -4  -3   0    7.76    0.59
   4   4   0   -0.17    0.25
   4   4   0   -0.16    0.22
   4   4   0   -0.31    0.25
   4   4   0   -0.46    0.26
   4   4   0   -0.27    0.28
   4   4   0   -0.14    0.24
   4   4   0   -0.54    0.34
   4   4   0   -0.07    0.39
  -4  -4   0   -0.15    0.29
  -4  -4   0    0.19    0.24
  -4  -4   0   -0.20    0.23
  -4  -4   0   -0.53    0.23
  -4  -4   0   -0.16    0.24
  -4  -4   0    0.01    0.31
   4   5   0   33.81    2.42
   4   5   0   35.41    2.46
   4   5   0   37.18    2.45
   4   5   0   32.80    2.45
   4   5   0   34.71    2.52
   4   5   0   36.46    2.51
  -4  -5   0   29.93    2.46
  -4  -5   0   37.30    2.47
  -4  -5   0   30.72    2.41
  -4  -5   0   37.30    2.47
  -4  -5   0   35.34    2.46
   4   6   0    8.53    0.83
   4   6   0    8.02    0.93
   4   6   0    8.40    1.01
   4   6   0    8.44    0.78
   4   6   0    8.25    0.96
   4   6   0    9.06    0.82
  -4  -6   0    8.43    0.86
  -4  -6   0    9.60    0.87
  -4  -6   0    8.04    0.75
  -4  -6   0    9.13    0.85
  -4  -6   0   10.24    0.91
   4   7   0   10.39    0.94
   4   7   0   10.38    0.96
   4   7   0    9.23    1.06
   4   7   0   10.75    0.89
   4   7   0    9.04    1.16
   4   7   0    9.86    1.08
  -4  -7   0   10.02    0.83
  -4  -7   0    9.11    0.96
  -4  -7   0   10.02    0.98
  -4  -7   0    8.96    1.03
  -4  -7   0    9.23    1.00
   4   8   0    4.81    0.78
   4   8   0    6.17    1.10
   4   8   0    5.27    0.63
   4   8   0    4.44    0.74
   4   8   0    4.87    0.56
   4   8   0    4.95    0.79
  -4  -8   0    4.89    0.60
  -4  -8   0    5.07    0.82
  -4  -8   0    6.16    0.75
  -4  -8   0    5.20    0.82
   4   9   0   -0.42    0.62
   4   9   0   -0.04    0.39
   4   9   0    0.24    0.46
   4   9   0    0.31    0.56
   4   9   0    0.13    0.61
   4   9   0    0.29    0.41
  -4  -9   0   -0.35    0.38
  -4  -9   0    0.56    0.47
  -4  -9   0    0.25    0.58
  -4  -9   0    0.63    0.32
   4  10   0    0.85    0.53
   4  10   0    1.00    0.46
   4  10   0    1.12    0.71
   4  10   0    0.88    0.48
   4  10   0    0.37    0.72
  -4 -10   0    1.22    0.34
  -4 -10   0    0.79    0.57
  -4 -10   0    2.02    0.57
  -4 -10   0    0.05    0.43
   4  11   0    3.23    0.61
   4  11   0    3.52    0.85
   4  11   0    4.37    0.84
   4  11   0    3.17    0.69
  -4 -11   0    2.43    0.55
  -4 -11   0    3.74    0.75
   4  12   0   -0.32    0.56
   4  12   0    0.32    0.66
  -4 -12   0   -0.22    0.75
   4  13   0   -0.26    0.71
   4  13   0    0.08    0.66
   4  13   0    0.19    0.85
  -4 -13   0    1.66    0.88
   4  14   0   -0.60    0.79
   4  14   0    0.65    0.94
   4  14   0   -0.09    0.72
  -4 -14   0    0.47    0.93
   4  15   0   -0.43    0.77
   4  15   0    1.44    1.06
  -4 -15   0    0.42    0.75
  -4 -15   0   -0.24    1.15
   5 -16   0    0.40    0.93
   5 -16   0    0.05    0.56
  -5  16   0    0.93    1.08
  -5  16   0    0.52    0.56
   5 -15   0    8.86    1.04
   5 -15   0    8.22    1.17
  -5  15   0   13.78    1.57
  -5  15   0   10.12    1.02
   5 -14   0    2.46    0.49
   5 -14   0    1.56    0.85
   5 -14   0    3.34    0.81
  -5  14   0    3.71    0.91
  -5  14   0    2.39    0.45
   5 -13   0    1.67    0.73
   5 -13   0    2.05    0.70
   5 -13   0    1.55    0.42
  -5  13   0    2.54    0.80
  -5  13   0    2.15    0.39
  -5  13   0    3.43    0.75
   5 -12   0    0.38    0.32
   5 -12   0    0.45    0.43
   5 -12   0   -0.69    0.95
  -5  12   0    0.85    0.33
  -5  12   0    1.05    0.62
  -5  12   0    0.45    0.32
  -5  12   0    0.98    0.72
  -5  12   0    0.88    0.43
   5 -11   0    6.15    1.24
   5 -11   0    3.41    0.62
   5 -11   0    3.01    0.39
  -5  11   0    3.08    0.38
  -5  11   0    3.82    0.80
  -5  11   0    3.69    0.53
  -5  11   0    2.41    0.71
  -5  11   0    3.30    0.66
   5 -10   0    9.99    1.37
   5 -10   0    8.78    0.96
  -5  10   0    8.24    0.91
  -5  10   0    8.69    0.73
  -5  10   0   11.43    1.36
  -5  10   0    8.29    1.12
  -5  10   0    8.42    1.24
  -5  10   0    8.51    0.81
  -5  10   0   10.38    0.75
   5  -9   0    2.36    0.49
   5  -9   0    2.33    0.57
  -5   9   0    2.47    0.28
  -5   9   0    2.11    0.61
  -5   9   0    2.49    0.52
  -5   9   0    2.50    0.42
  -5   9   0    3.30    0.41
  -5   9   0    1.85    0.51
  -5   9   0    3.09    0.29
   5  -8   0    5.55    0.62
   5  -8   0    5.41    0.94
  -5   8   0    4.19    0.60
  -5   8   0    5.50    0.61
  -5   8   0    5.08    0.76
  -5   8   0    5.57    0.78
  -5   8   0    5.20    0.41
  -5   8   0    4.33    0.55
  -5   8   0    4.18    0.40
   5  -7   0    7.95    1.06
   5  -7   0    9.67    0.99
  -5   7   0   10.79    0.96
  -5   7   0   10.45    0.81
  -5   7   0    9.66    1.01
  -5   7   0   10.36    0.92
  -5   7   0    9.31    0.83
   5  -6   0    2.77    0.48
  -5   6   0    2.77    0.41
  -5   6   0    2.68    0.45
  -5   6   0    1.89    0.39
  -5   6   0    2.53    0.38
  -5   6   0    2.67    0.38
  -5   6   0    2.14    0.43
   5  -5   0   11.17    1.12
   5  -5   0   12.80    0.88
   5  -5   0   12.36    1.07
  -5   5   0   12.45    0.92
  -5   5   0   11.51    1.02
  -5   5   0   12.10    0.89
  -5   5   0   12.29    0.95
  -5   5   0   12.85    0.95
  -5   5   0   12.87    0.88
   5  -4   0    4.42    0.73
   5  -4   0    5.06    0.39
   5  -4   0    4.28    0.56
   5  -4   0    5.21    0.44
   5  -4   0    5.36    0.65
   5  -4   0    5.06    0.44
   5  -4   0    4.50    0.60
  -5   4   0    4.98    0.54
  -5   4   0    5.21    0.53
  -5   4   0    4.89    0.45
  -5   4   0    5.48    0.55
  -5   4   0    4.96    0.43
  -5   4   0    5.44    0.46
   5  -3   0   41.35    3.01
   5  -3   0   42.85    2.98
   5  -3   0   40.67    2.97
   5  -3   0   43.15    3.09
   5  -3   0   46.65    3.06
   5  -3   0   41.65    2.99
   5  -3   0   43.86    3.01
  -5   3   0   45.13    3.03
  -5   3   0   43.81    2.97
  -5   3   0   44.38    3.04
  -5   3   0   46.39    2.99
  -5   3   0   42.18    2.98
  -5   3   0   43.70    3.02
   5  -2   0   40.76    2.95
   5  -2   0   41.99    2.96
   5  -2   0   45.10    3.01
   5  -2   0   42.14    3.01
   5  -2   0   42.72    2.96
  -5   2   0   44.65    2.97
  -5   2   0   47.18    2.99
  -5   2   0   45.60    2.96
  -5   2   0   44.18    2.99
  -5   2   0   36.86    2.94
   5  -1   0    3.20    0.40
   5  -1   0    2.42    0.38
   5  -1   0    3.12    0.34
   5  -1   0    3.28    0.37
  -5   1   0    2.84    0.38
  -5   1   0    2.78    0.60
  -5   1   0    2.85    0.39
  -5   1   0    3.27    0.38
  -5   1   0    3.00    0.34
   5   0   0   67.87    4.56
   5   0   0   68.63    4.58
   5   0   0   64.56    4.60
   5   0   0   67.83    4.60
   5   0   0   66.07    4.58
  -5   0   0   72.86    4.59
  -5   0   0   70.40    4.64
  -5   0   0   71.24    4.58
  -5   0   0   59.81    4.57
  -5   0   0   58.70    4.57
   5   1   0   64.20    5.03
   5   1   0   68.41    5.00
   5   1   0   71.76    5.04
   5   1   0   68.00    5.02
   5   1   0   70.70    5.02
  -5  -1   0   70.57    5.02
  -5  -1   0   82.96    5.08
  -5  -1   0   75.48    5.02
  -5  -1   0   70.39    5.02
  -5  -1   0   84.94    5.01
  -5  -1   0   73.05    5.03
  -5  -1   0   78.52    5.03
   5   2   0   14.42    1.14
   5   2   0   13.92    1.03
   5   2   0   13.14    1.07
   5   2   0   13.51    1.05
   5   2   0   12.59    1.09
   5   2   0   12.92    1.06
  -5  -2   0   13.26    1.08
  -5  -2   0   13.63    1.12
  -5  -2   0   15.83    1.03
  -5  -2   0   14.38    1.02
  -5  -2   0   11.49    1.02
  -5  -2   0   13.76    1.07
  -5  -2   0   13.88    1.05
  -5  -2   0   14.60    1.12
   5   3   0    5.26    0.61
   5   3   0    4.31    0.58
   5   3   0    4.16    0.52
   5   3   0    4.61    0.50
   5   3   0    4.56    0.56
   5   3   0    4.97    0.51
   5   3   0    3.63    0.65
   5   3   0    5.31    0.71
  -5  -3   0    4.77    0.60
  -5  -3   0    3.94    0.52
  -5  -3   0    4.96    0.49
  -5  -3   0    4.28    0.66
  -5  -3   0    3.97    0.58
  -5  -3   0    4.80    0.59
  -5  -3   0    4.41    0.53
   5   4   0   34.96    2.40
   5   4   0   35.33    2.37
   5   4   0   33.47    2.36
   5   4   0   35.35    2.37
   5   4   0   32.96    2.45
   5   4   0   33.38    2.40
   5   4   0   33.39    2.43
   5   4   0   33.83    2.43
  -5  -4   0   36.46    2.41
  -5  -4   0   30.77    2.37
  -5  -4   0   29.90    2.40
  -5  -4   0   34.19    2.35
  -5  -4   0   33.65    2.43
  -5  -4   0   34.04    2.41
  -5  -4   0   33.84    2.37
   5   5   0   12.97    1.07
   5   5   0   13.37    1.22
   5   5   0   14.00    1.11
   5   5   0   14.19    1.06
   5   5   0   12.26    1.11
   5   5   0   13.05    1.06
   5   5   0   14.02    1.21
   5   5   0   12.04    1.15
  -5  -5   0   13.69    1.13
  -5  -5   0   13.95    1.09
  -5  -5   0   15.21    1.15
  -5  -5   0   13.01    1.13
  -5  -5   0   12.78    1.15
   5   6   0   10.55    0.80
   5   6   0    9.96    0.87
   5   6   0    8.29    0.88
   5   6   0    9.99    0.92
   5   6   0    9.35    1.10
   5   6   0    9.36    0.85
   5   6   0   10.77    1.10
  -5  -6   0   10.30    0.93
  -5  -6   0   10.76    1.01
  -5  -6   0    7.65    0.82
  -5  -6   0    9.29    0.98
  -5  -6   0    8.13    0.97
  -5  -6   0    9.94    0.99
   5   7   0   -0.74    0.62
   5   7   0   -0.90    0.52
   5   7   0    0.28    0.37
   5   7   0    0.70    0.39
   5   7   0   -0.71    0.47
   5   7   0   -0.28    0.38
  -5  -7   0   -0.66    0.52
  -5  -7   0   -0.38    0.43
  -5  -7   0   -0.08    0.33
  -5  -7   0   -0.24    0.40
   5   8   0    3.12    0.80
   5   8   0    3.57    0.49
   5   8   0    2.88    0.50
   5   8   0    2.90    0.67
   5   8   0    3.25    0.55
   5   8   0    3.34    0.65
  -5  -8   0    2.54    0.48
  -5  -8   0    2.93    0.45
  -5  -8   0    3.58    0.70
  -5  -8   0    2.85    0.53
   5   9   0    6.08    0.95
   5   9   0    5.44    0.87
   5   9   0    5.01    0.83
   5   9   0    5.56    1.07
   5   9   0    6.84    0.89
   5   9   0    6.27    0.84
  -5  -9   0    6.15    0.86
  -5  -9   0    6.32    0.70
  -5  -9   0    4.42    0.72
  -5  -9   0    6.00    0.93
   5  10   0    1.75    0.58
   5  10   0    1.82    0.55
   5  10   0    2.06    0.76
   5  10   0    1.41    0.49
   5  10   0    1.59    0.73
  -5 -10   0    1.64    0.73
  -5 -10   0    1.36    0.68
  -5 -10   0    1.37    0.51
  -5 -10   0    1.72    0.41
   5  11   0    5.23    0.92
   5  11   0    3.29    0.70
   5  11   0    4.08    0.91
   5  11   0    3.93    0.69
  -5 -11   0    2.77    0.78
   5  12   0   -0.20    0.65
   5  12   0   -0.09    0.66
   5  12   0    0.28    0.88
  -5 -12   0   -0.20    0.79
   5  13   0   -0.21    0.87
   5  13   0   -0.21    0.68
   5  13   0    0.25    0.73
  -5 -13   0    0.71    0.91
   5  14   0    1.01    0.77
   5  14   0    1.41    0.87
   5  14   0    0.70    1.00
  -5 -14   0    0.04    1.02
   6 -16   0    4.39    0.67
   6 -16   0    5.05    1.06
  -6  16   0    4.55    0.67
  -6  16   0    7.09    1.28
   6 -15   0    9.53    1.50
   6 -15   0   11.05    1.12
  -6  15   0   13.21    1.09
  -6  15   0   14.65    1.69
   6 -14   0    0.31    0.43
   6 -14   0    1.43    0.72
  -6  14   0    1.25    0.86
  -6  14   0    1.35    0.40
  -6  14   0    0.71    0.53
   6 -13   0    3.04    0.67
   6 -13   0    2.09    0.44
  -6  13   0    3.98    0.90
  -6  13   0    2.31    0.58
  -6  13   0    2.64    0.41
   6 -12   0    0.97    0.32
   6 -12   0    2.20    0.81
   6 -12   0   -0.23    0.73
   6 -12   0    0.19    0.34
   6 -12   0    0.91    0.74
  -6  12   0    0.46    0.30
  -6  12   0    0.66    0.74
  -6  12   0    0.43    0.48
   6 -11   0    1.27    0.72
   6 -11   0    2.47    0.36
   6 -11   0    3.08    0.59
   6 -11   0    3.83    0.83
  -6  11   0    2.51    0.48
  -6  11   0    3.28    0.43
  -6  11   0    2.22    0.52
  -6  11   0    3.12    0.76
   6 -10   0    0.70    0.64
   6 -10   0    0.53    0.47
  -6  10   0    0.25    0.29
  -6  10   0   -0.15    0.52
  -6  10   0   -0.38    0.37
  -6  10   0    0.90    0.23
  -6  10   0   -0.18    0.42
   6  -9   0   40.91    3.04
   6  -9   0   43.87    2.90
   6  -9   0   44.72    3.14
  -6   9   0   40.39    2.81
  -6   9   0   34.90    2.80
  -6   9   0   38.96    3.01
  -6   9   0   43.33    2.89
  -6   9   0   40.88    2.92
  -6   9   0   41.62    3.06
   6  -8   0    2.16    0.30
   6  -8   0    1.69    0.53
   6  -8   0    2.94    0.44
   6  -8   0    2.24    0.58
  -6   8   0    1.94    0.26
  -6   8   0    1.47    0.48
  -6   8   0    2.77    0.42
  -6   8   0    2.28    0.43
  -6   8   0    2.93    0.57
   6  -7   0   16.78    1.38
   6  -7   0   16.41    1.44
   6  -7   0   14.87    1.12
  -6   7   0   16.72    1.23
  -6   7   0   17.54    1.39
  -6   7   0   14.20    1.32
  -6   7   0   16.51    1.25
   6  -6   0    0.48    0.12
   6  -6   0    0.22    0.37
   6  -6   0    0.15    0.40
  -6   6   0    0.17    0.31
  -6   6   0    0.54    0.25
  -6   6   0    0.50    0.37
  -6   6   0   -0.04    0.30
  -6   6   0    0.23    0.32
   6  -5   0   10.33    0.78
   6  -5   0   10.78    0.78
   6  -5   0    9.78    1.02
   6  -5   0   10.00    0.89
  -6   5   0   10.22    0.92
  -6   5   0   10.39    0.74
  -6   5   0   10.74    0.80
  -6   5   0   11.73    0.95
  -6   5   0    9.76    0.73
  -6   5   0   10.51    0.88
  -6   5   0   10.25    0.87
   6  -4   0    4.45    0.78
   6  -4   0    4.50    0.59
   6  -4   0    4.99    0.43
   6  -4   0    4.40    0.46
   6  -4   0    4.89    0.46
   6  -4   0    5.69    0.58
   6  -4   0    5.56    0.72
  -6   4   0    5.07    0.41
  -6   4   0    4.96    0.45
  -6   4   0    5.23    0.53
  -6   4   0    4.67    0.47
  -6   4   0    5.67    0.63
  -6   4   0    4.33    0.57
  -6   4   0    4.99    0.42
  -6   4   0    4.53    0.49
   6  -3   0   41.29    3.21
   6  -3   0   47.58    3.21
   6  -3   0   47.13    3.21
   6  -3   0   44.38    3.19
   6  -3   0   51.27    3.24
   6  -3   0   50.59    3.28
  -6   3   0   47.43    3.21
  -6   3   0   44.89    3.21
  -6   3   0   46.86    3.24
  -6   3   0   47.01    3.25
  -6   3   0   41.86    3.19
  -6   3   0   50.05    3.21
   6  -2   0   31.10    2.07
   6  -2   0   28.35    2.06
   6  -2   0   28.66    1.99
   6  -2   0   30.34    1.97
   6  -2   0   29.37    2.00
  -6   2   0   25.03    2.02
  -6   2   0   28.01    2.02
  -6   2   0   28.73    2.00
  -6   2   0   28.72    1.99
  -6   2   0   27.23    1.99
  -6   2   0   27.34    1.97
   6  -1   0  113.33    7.76
   6  -1   0  109.57    7.76
   6  -1   0  116.25    7.74
   6  -1   0  115.35    7.72
   6  -1   0  111.98    7.73
  -6   1   0  113.31    7.72
  -6   1   0  115.21    7.75
  -6   1   0  114.59    7.74
  -6   1   0  111.33    7.81
  -6   1   0  102.74    7.75
  -6   1   0  123.06    7.73
   6   0   0   65.60    4.71
   6   0   0   66.49    4.72
   6   0   0   69.36    4.67
   6   0   0   70.93    4.70
   6   0   0   65.94    4.69
  -6   0   0   73.74    4.72
  -6   0   0   65.33    4.69
  -6   0   0   69.36    4.70
  -6   0   0   66.93    4.67
  -6   0   0   68.32    4.76
  -6   0   0   69.26    4.70
   6   1   0   16.25    1.20
   6   1   0   16.57    1.30
   6   1   0   15.91    1.23
   6   1   0   16.58    1.25
   6   1   0   16.26    1.28
  -6  -1   0   16.36    1.24
  -6  -1   0   16.21    1.22
  -6  -1   0   16.41    1.26
  -6  -1   0   16.44    1.20
  -6  -1   0   16.26    1.34
  -6  -1   0   17.17    1.25
   6   2   0    8.23    0.68
   6   2   0    7.25    0.72
   6   2   0    9.91    0.86
   6   2   0    8.54    0.68
   6   2   0    8.76    0.72
   6   2   0    7.58    0.76
   6   2   0    8.04    0.78
  -6  -2   0    7.98    0.71
  -6  -2   0    7.79    0.78
  -6  -2   0    7.01    0.71
  -6  -2   0    7.50    0.70
  -6  -2   0    7.41    0.78
  -6  -2   0    8.31    0.77
  -6  -2   0    5.92    0.68
  -6  -2   0    7.29    0.84
   6   3   0   -0.18    0.37
   6   3   0    0.02    0.25
   6   3   0   -0.08    0.25
   6   3   0    0.12    0.43
   6   3   0    0.15    0.27
   6   3   0    0.00    0.28
   6   3   0    0.13    0.24
  -6  -3   0   -0.10    0.27
  -6  -3   0   -0.02    0.29
  -6  -3   0   -0.47    0.29
  -6  -3   0   -0.47    0.32
  -6  -3   0   -0.25    0.26
  -6  -3   0   -0.24    0.31
  -6  -3   0   -0.23    0.27
   6   4   0   41.04    2.94
   6   4   0   40.66    2.88
   6   4   0   41.07    2.84
   6   4   0   40.80    2.84
   6   4   0   42.45    2.85
   6   4   0   39.63    2.91
   6   4   0   39.52    2.89
  -6  -4   0   40.17    2.85
  -6  -4   0   42.70    2.90
  -6  -4   0   39.53    2.84
  -6  -4   0   39.70    2.86
  -6  -4   0   39.58    2.90
  -6  -4   0   39.40    2.93
  -6  -4   0   44.28    2.90
   6   5   0    5.91    0.74
   6   5   0    6.66    0.70
   6   5   0    5.51    0.83
   6   5   0    5.92    0.79
   6   5   0    4.09    0.90
   6   5   0    5.08    0.69
   6   5   0    6.33    0.96
   6   5   0    7.12    0.69
  -6  -5   0    4.61    0.65
  -6  -5   0    3.79    0.87
  -6  -5   0    8.03    0.81
  -6  -5   0    7.98    0.84
  -6  -5   0    7.17    0.74
  -6  -5   0    6.43    0.83
   6   6   0   22.86    1.76
   6   6   0   24.10    1.71
   6   6   0   22.06    1.88
   6   6   0   23.74    1.72
   6   6   0   22.66    1.89
   6   6   0   23.19    1.71
   6   6   0   25.35    1.67
   6   6   0   19.76    1.81
  -6  -6   0   21.06    1.81
  -6  -6   0   23.52    1.73
  -6  -6   0   24.29    1.79
  -6  -6   0   24.58    1.83
  -6  -6   0   21.00    1.81
  -6  -6   0   20.97    1.70
   6   7   0   16.06    1.37
   6   7   0   19.32    1.42
   6   7   0   15.67    1.52
   6   7   0   18.26    1.66
   6   7   0   18.22    1.44
   6   7   0   17.94    1.31
   6   7   0   17.27    1.38
   6   7   0   13.90    2.09
  -6  -7   0   16.46    1.36
  -6  -7   0   19.39    1.65
  -6  -7   0   16.31    1.53
  -6  -7   0   17.01    1.42
  -6  -7   0   17.60    1.53
   6   8   0    4.00    0.75
   6   8   0    4.10    0.86
   6   8   0    4.42    0.60
   6   8   0    5.82    0.83
   6   8   0    4.06    0.60
   6   8   0    4.30    0.56
   6   8   0    4.08    0.73
   6   8   0    3.66    0.60
  -6  -8   0    4.86    0.69
  -6  -8   0    2.74    0.62
  -6  -8   0    3.39    0.56
  -6  -8   0    5.52    0.78
  -6  -8   0    3.04    0.69
   6   9   0   -0.33    0.51
   6   9   0    0.72    0.67
   6   9   0    0.41    0.44
   6   9   0   -0.33    0.50
   6   9   0   -0.67    0.70
   6   9   0   -0.91    0.74
  -6  -9   0   -0.85    0.56
  -6  -9   0   -0.48    0.43
  -6  -9   0   -0.77    0.47
  -6  -9   0   -0.46    0.61
   6  10   0    4.52    0.72
   6  10   0    4.98    0.74
   6  10   0    5.98    0.98
   6  10   0    5.75    0.92
  -6 -10   0    4.32    0.72
  -6 -10   0    3.84    0.68
  -6 -10   0    6.35    0.95
   6  11   0    1.81    0.90
   6  11   0    2.79    0.91
   6  11   0    2.42    0.64
   6  11   0    2.73    0.69
  -6 -11   0    2.71    0.83
   6  12   0    6.30    1.12
   6  12   0    4.18    0.84
   6  12   0    4.79    0.80
  -6 -12   0    4.55    1.01
   6  13   0   -0.09    0.98
   6  13   0    0.17    0.73
   6  13   0   -0.28    0.77
  -6 -13   0   -0.42    0.92
   6  14   0   -0.04    1.05
   6  14   0   -0.40    0.95
  -6 -14   0   -1.08    1.31
  -6 -14   0    0.99    0.77
   7 -16   0    7.71    0.96
   7 -16   0    5.96    1.14
  -7  16   0   11.41    1.77
  -7  16   0    7.86    0.93
   7 -15   0    0.44    0.80
   7 -15   0    1.05    0.45
  -7  15   0    2.76    1.07
   7 -14   0    8.49    0.87
   7 -14   0    8.35    1.31
  -7  14   0   10.03    1.65
  -7  14   0    8.30    0.84
  -7  14   0    9.11    1.25
   7 -13   0    2.12    0.40
   7 -13   0    1.55    0.67
  -7  13   0    3.32    0.87
  -7  13   0    1.59    0.61
   7 -12   0    1.17    0.80
   7 -12   0    1.49    0.34
   7 -12   0    0.34    0.61
  -7  12   0    1.68    0.33
  -7  12   0    1.14    0.56
  -7  12   0    1.91    0.50
  -7  12   0    1.76    0.83
  -7  12   0    1.49    0.31
   7 -11   0    1.15    0.74
   7 -11   0    0.60    0.29
   7 -11   0    1.09    0.53
  -7  11   0    0.01    0.69
  -7  11   0   -0.12    0.69
  -7  11   0    0.20    0.48
  -7  11   0    1.17    0.26
  -7  11   0    0.83    0.26
  -7  11   0    0.50    0.43
   7 -10   0    1.10    0.71
   7 -10   0   -0.39    0.24
   7 -10   0    0.17    0.45
   7 -10   0    0.13    0.64
  -7  10   0   -0.74    0.41
  -7  10   0   -0.39    0.20
  -7  10   0   -0.26    0.45
  -7  10   0   -0.65    0.59
   7  -9   0   71.85    4.87
   7  -9   0   60.51    4.59
   7  -9   0   67.27    4.80
   7  -9   0   69.81    4.65
  -7   9   0   65.66    4.59
  -7   9   0   59.64    4.58
  -7   9   0   72.30    4.76
  -7   9   0   66.85    4.81
  -7   9   0   73.92    4.69
  -7   9   0   66.14    4.69
   7  -8   0   18.58    1.37
   7  -8   0   20.24    1.76
   7  -8   0   20.83    1.72
  -7   8   0   18.90    1.55
  -7   8   0   19.25    1.37
  -7   8   0   20.89    1.67
  -7   8   0   17.94    1.36
  -7   8   0   20.79    1.69
  -7   8   0   20.72    1.53
   7  -7   0    5.16    1.08
   7  -7   0    6.90    0.50
   7  -7   0    5.43    0.77
   7  -7   0    6.29    0.95
  -7   7   0    6.40    0.73
  -7   7   0    6.71    0.60
  -7   7   0    5.99    0.49
  -7   7   0    6.82    0.71
  -7   7   0    5.92    0.48
  -7   7   0    6.32    0.84
  -7   7   0    6.20    0.90
   7  -6   0    0.60    0.42
   7  -6   0    0.84    0.44
   7  -6   0    0.84    0.19
   7  -6   0    0.79    0.36
  -7   6   0    0.62    0.38
  -7   6   0    0.74    0.36
  -7   6   0    0.93    0.41
  -7   6   0    0.87    0.17
  -7   6   0    0.92    0.15
  -7   6   0    1.01    0.27
   7  -5   0   16.35    1.09
   7  -5   0   15.69    1.31
   7  -5   0   14.88    1.35
   7  -5   0   15.57    1.11
   7  -5   0   15.08    1.10
   7  -5   0   15.70    1.20
  -7   5   0   14.75    1.11
  -7   5   0   14.79    1.20
  -7   5   0   15.89    1.24
  -7   5   0   13.80    1.07
  -7   5   0   16.12    1.08
  -7   5   0   14.87    1.11
  -7   5   0   14.29    1.17
   7  -4   0   -0.08    0.17
   7  -4   0    0.22    0.22
   7  -4   0    0.08    0.28
   7  -4   0    0.09    0.39
   7  -4   0   -0.06    0.18
   7  -4   0   -0.21    0.34
   7  -4   0   -0.11    0.18
   7  -4   0   -0.05    0.21
  -7   4   0   -0.46    0.30
  -7   4   0    0.06    0.32
  -7   4   0   -0.20    0.18
  -7   4   0   -0.03    0.16
  -7   4   0    0.17    0.21
   7  -3   0   15.82    1.11
   7  -3   0   16.32    1.18
   7  -3   0   15.93    1.27
   7  -3   0   15.85    1.26
   7  -3   0   15.67    1.14
   7  -3   0   15.43    1.13
  -7   3   0   15.78    1.14
  -7   3   0   15.82    1.12
  -7   3   0   14.09    1.20
  -7   3   0   15.00    1.21
  -7   3   0   14.15    1.10
   7  -2   0    0.91    0.23
   7  -2   0    1.90    0.41
   7  -2   0    1.38    0.23
   7  -2   0    1.48    0.26
   7  -2   0    1.55    0.29
   7  -2   0    1.34    0.38
  -7   2   0    1.17    0.29
  -7   2   0    1.42    0.23
  -7   2   0    1.31    0.37
  -7   2   0    1.04    0.31
  -7   2   0    1.42    0.25
   7  -1   0   22.89    1.68
   7  -1   0   21.21    1.65
   7  -1   0   22.73    1.58
   7  -1   0   21.56    1.60
   7  -1   0   21.99    1.62
  -7   1   0   22.27    1.60
  -7   1   0   23.65    1.64
  -7   1   0   22.57    1.64
  -7   1   0   22.07    1.76
  -7   1   0   22.19    1.58
   7   0   0    0.54    0.24
   7   0   0    0.60    0.37
   7   0   0    0.75    0.38
   7   0   0    0.49    0.24
   7   0   0    0.19    0.26
  -7   0   0    0.72    0.29
  -7   0   0    0.74    0.25
  -7   0   0    0.73    0.23
  -7   0   0    0.46    0.34
  -7   0   0    0.93    0.32
  -7   0   0    0.82    0.37
   7   1   0   38.84    2.62
   7   1   0   37.73    2.64
   7   1   0   37.99    2.69
   7   1   0   39.04    2.66
   7   1   0   39.25    2.68
  -7  -1   0   38.29    2.73
  -7  -1   0   31.79    2.63
  -7  -1   0   38.27    2.65
  -7  -1   0   36.02    2.65
  -7  -1   0   37.88    2.65
  -7  -1   0   38.06    2.62
   7   2   0   -0.02    0.39
   7   2   0   -0.01    0.24
   7   2   0   -0.27    0.28
   7   2   0    0.24    0.45
   7   2   0    0.10    0.27
   7   2   0   -0.24    0.22
   7   2   0    0.07    0.26
  -7  -2   0   -0.35    0.38
  -7  -2   0   -0.08    0.28
  -7  -2   0   -0.45    0.26
  -7  -2   0   -0.09    0.30
  -7  -2   0    0.01    0.34
  -7  -2   0   -0.19    0.33
  -7  -2   0   -0.29    0.34
   7   3   0   37.38    2.79
   7   3   0   40.09    2.70
   7   3   0   39.15    2.72
   7   3   0   36.58    2.75
   7   3   0   37.71    2.75
   7   3   0   43.52    2.93
   7   3   0   37.05    2.76
   7   3   0   39.29    2.78
  -7  -3   0   36.98    2.80
  -7  -3   0   41.73    2.76
  -7  -3   0   40.44    2.77
  -7  -3   0   36.88    2.71
  -7  -3   0   38.30    2.83
  -7  -3   0   37.09    2.71
   7   4   0    5.88    0.87
   7   4   0    6.70    0.97
   7   4   0    5.95    0.77
   7   4   0    5.81    0.82
   7   4   0    5.92    0.67
   7   4   0    4.94    0.61
   7   4   0    6.23    0.69
   7   4   0    7.19    0.69
  -7  -4   0    7.11    0.80
  -7  -4   0    6.56    0.71
  -7  -4   0    4.66    0.71
  -7  -4   0    6.52    0.82
  -7  -4   0    5.38    0.68
  -7  -4   0    5.19    0.95
   7   5   0   12.70    1.32
   7   5   0   12.99    1.07
   7   5   0   12.89    1.08
   7   5   0   10.39    1.17
   7   5   0   12.01    1.07
   7   5   0   11.60    1.21
   7   5   0   12.85    1.15
   7   5   0   11.66    1.27
  -7  -5   0   13.50    1.19
  -7  -5   0   12.88    1.12
  -7  -5   0   14.25    1.21
  -7  -5   0   10.92    1.25
  -7  -5   0   12.91    1.13
  -7  -5   0   11.95    1.28
   7   6   0   -0.12    0.40
   7   6   0   -0.06    0.39
   7   6   0   -0.76    0.46
   7   6   0   -0.84    0.74
   7   6   0   -0.52    0.51
   7   6   0    0.30    0.34
   7   6   0    0.02    0.37
   7   6   0   -0.20    0.39
  -7  -6   0   -0.53    0.41
  -7  -6   0   -0.13    0.45
  -7  -6   0   -0.02    0.48
  -7  -6   0    0.29    0.57
  -7  -6   0   -0.30    0.44
  -7  -6   0   -0.64    0.41
   7   7   0    1.54    0.60
   7   7   0    2.19    0.52
   7   7   0    2.72    0.46
   7   7   0    1.91    0.40
   7   7   0    1.92    0.48
   7   7   0    1.98    0.50
   7   7   0    1.62    0.64
   7   7   0    2.21    0.78
  -7  -7   0    3.09    0.71
  -7  -7   0    1.25    0.60
  -7  -7   0    2.53    0.50
  -7  -7   0    2.67    0.53
  -7  -7   0    2.00    0.55
   7   8   0    0.91    0.68
   7   8   0    0.23    0.32
   7   8   0    0.48    0.77
   7   8   0    0.65    0.62
   7   8   0    1.18    0.53
   7   8   0    0.64    0.48
   7   8   0    0.43    0.43
   7   8   0    0.71    0.46
  -7  -8   0    0.91    0.52
  -7  -8   0    0.10    0.63
  -7  -8   0    0.62    0.54
  -7  -8   0    0.85    0.46
  -7  -8   0    1.22    0.71
   7   9   0    0.31    0.71
   7   9   0   -0.46    0.88
   7   9   0   -0.49    0.79
   7   9   0   -0.12    0.56
   7   9   0   -0.14    0.58
  -7  -9   0   -0.37    0.46
  -7  -9   0   -0.14    0.56
  -7  -9   0   -0.22    0.72
  -7  -9   0    1.40    0.81
   7  10   0    0.53    0.90
   7  10   0    0.77    0.84
   7  10   0    0.86    0.66
   7  10   0    1.12    0.60
  -7 -10   0    0.08    0.81
  -7 -10   0    0.51    0.53
   7  11   0    1.22    0.67
   7  11   0    2.27    0.96
   7  11   0    1.62    0.69
  -7 -11   0    0.79    0.81
   7  12   0    3.12    0.80
   7  12   0    3.42    0.82
   7  12   0    5.39    1.13
  -7 -12   0    2.11    0.99
   7  13   0    0.43    0.84
   7  13   0    0.55    0.82
   7  13   0    0.68    1.09
  -7 -13   0   -0.22    1.06
   8 -16   0   -1.14    0.95
   8 -16   0    0.35    0.99
   8 -16   0    1.15    0.53
  -8  16   0    0.93    1.05
  -8  16   0    2.19    0.55
   8 -15   0   -0.09    0.45
   8 -15   0    1.44    0.83
   8 -15   0    0.03    0.80
  -8  15   0    0.44    0.61
  -8  15   0    0.05    0.42
  -8  15   0    0.23    0.94
   8 -14   0    1.83    0.78
   8 -14   0    1.74    0.84
  -8  14   0    4.73    0.98
   8 -13   0    8.14    0.78
   8 -13   0    7.25    1.13
   8 -13   0    8.83    1.30
  -8  13   0    8.59    0.75
  -8  13   0    7.84    0.80
  -8  13   0    6.52    1.13
  -8  13   0    8.65    0.96
  -8  13   0   10.25    1.39
   8 -12   0    0.91    0.31
   8 -12   0    0.20    0.84
   8 -12   0    0.06    0.65
   8 -12   0    0.92    0.60
  -8  12   0    0.27    0.49
  -8  12   0    1.03    0.30
  -8  12   0    0.75    0.28
  -8  12   0    1.27    0.58
  -8  12   0    0.37    0.73
   8 -11   0   20.32    1.82
   8 -11   0   22.59    1.65
   8 -11   0   19.81    1.50
   8 -11   0   21.49    2.01
  -8  11   0   21.37    1.66
  -8  11   0   19.53    1.51
  -8  11   0   21.94    2.08
  -8  11   0   19.71    1.50
  -8  11   0   23.75    1.88
   8 -10   0    0.69    0.47
   8 -10   0   -0.02    0.53
   8 -10   0    0.85    0.81
   8 -10   0    0.28    0.24
   8 -10   0   -0.05    0.66
  -8  10   0    0.01    0.49
  -8  10   0    0.44    0.47
  -8  10   0    0.12    0.22
  -8  10   0    0.05    0.62
  -8  10   0   -0.51    0.59
  -8  10   0    0.29    0.22
   8  -9   0    1.37    0.67
   8  -9   0    1.44    0.66
   8  -9   0    1.95    0.48
   8  -9   0    1.38    0.54
  -8   9   0    1.07    0.52
  -8   9   0    2.91    0.69
  -8   9   0    2.73    0.55
  -8   9   0    2.03    0.26
   8  -8   0    0.58    0.24
   8  -8   0    1.29    0.59
   8  -8   0    0.91    0.47
   8  -8   0    0.00    0.57
  -8   8   0    0.69    0.46
  -8   8   0    0.83    0.47
  -8   8   0    0.64    0.55
  -8   8   0    0.81    0.19
  -8   8   0    0.73    0.20
   8  -7   0    2.54    0.62
   8  -7   0    2.34    0.62
   8  -7   0    2.32    0.49
   8  -7   0    3.29    0.33
  -8   7   0    2.73    0.49
  -8   7   0    3.07    0.39
  -8   7   0    2.88    0.28
  -8   7   0    2.83    0.39
  -8   7   0    3.74    0.61
  -8   7   0    2.87    0.53
   8  -6   0    1.85    0.26
   8  -6   0    0.79    0.49
   8  -6   0    1.46    0.24
   8  -6   0    1.93    0.42
   8  -6   0    1.60    0.55
  -8   6   0    1.71    0.22
  -8   6   0    2.07    0.26
  -8   6   0    1.87    0.47
  -8   6   0    1.53    0.50
  -8   6   0    1.41    0.31
  -8   6   0    1.20    0.43
   8  -5   0    0.26    0.20
   8  -5   0    0.49    0.46
   8  -5   0    0.34    0.41
   8  -5   0    0.02    0.21
   8  -5   0   -0.03    0.33
  -8   5   0    0.17    0.19
  -8   5   0   -0.14    0.39
  -8   5   0   -0.07    0.23
  -8   5   0    0.10    0.21
  -8   5   0    0.21    0.18
  -8   5   0    0.22    0.34
   8  -4   0   12.41    0.96
   8  -4   0   11.92    1.13
   8  -4   0   12.50    1.14
   8  -4   0   12.63    1.02
   8  -4   0   12.09    0.91
   8  -4   0   12.17    1.25
  -8   4   0   10.99    0.90
  -8   4   0   11.51    1.05
  -8   4   0   12.41    1.02
  -8   4   0   12.42    0.95
  -8   4   0   12.42    0.92
   8  -3   0    1.94    0.44
   8  -3   0    1.87    0.47
   8  -3   0    1.41    0.29
   8  -3   0    1.61    0.48
   8  -3   0    1.80    0.33
   8  -3   0    1.75    0.26
  -8   3   0    1.84    0.37
  -8   3   0    1.94    0.29
  -8   3   0    1.70    0.39
  -8   3   0    1.74    0.26
  -8   3   0    1.93    0.31
   8  -2   0    8.47    0.77
   8  -2   0    9.03    0.90
   8  -2   0    8.86    0.92
   8  -2   0    9.09    0.80
   8  -2   0    8.34    0.73
   8  -2   0    9.36    0.77
  -8   2   0    9.28    0.76
  -8   2   0    8.84    0.74
  -8   2   0    8.25    0.84
  -8   2   0    9.33    0.77
  -8   2   0    7.86    0.80
   8  -1   0    7.24    0.84
   8  -1   0    7.45    0.85
   8  -1   0    7.67    0.66
   8  -1   0    6.89    0.72
   8  -1   0    7.07    0.67
  -8   1   0    5.62    0.70
  -8   1   0    7.85    0.65
  -8   1   0    6.42    0.74
  -8   1   0    6.78    0.92
  -8   1   0    7.29    0.67
   8   0   0    2.30    0.34
   8   0   0    2.98    0.48
   8   0   0    1.97    0.35
   8   0   0    2.77    0.54
   8   0   0    2.36    0.34
  -8   0   0    2.09    0.42
  -8   0   0    2.50    0.33
  -8   0   0    2.57    0.43
  -8   0   0    2.71    0.39
  -8   0   0    2.40    0.47
  -8   0   0    1.97    0.39
   8   1   0    7.08    0.88
   8   1   0    9.46    0.94
   8   1   0    7.90    0.87
   8   1   0    7.89    0.77
   8   1   0    8.05    0.74
   8   1   0    8.20    0.81
  -8  -1   0    8.06    0.75
  -8  -1   0    8.82    1.02
  -8  -1   0    8.05    0.78
  -8  -1   0    7.79    0.79
  -8  -1   0    7.70    0.82
  -8  -1   0    7.71    0.79
   8   2   0    3.60    0.50
   8   2   0    3.53    0.47
   8   2   0    3.42    0.66
   8   2   0    4.48    0.46
   8   2   0    3.54    0.46
  -8  -2   0    3.10    0.55
  -8  -2   0    3.90    0.59
  -8  -2   0    3.35    0.54
  -8  -2   0    3.64    0.47
  -8  -2   0    3.29    0.51
  -8  -2   0    3.55    0.45
   8   3   0   14.23    1.27
   8   3   0   14.60    1.41
   8   3   0   14.11    1.21
   8   3   0   15.12    1.14
   8   3   0   14.57    1.24
   8   3   0   14.15    1.20
   8   3   0   14.33    1.30
  -8  -3   0   13.81    1.24
  -8  -3   0   14.29    1.20
  -8  -3   0   14.26    1.20
  -8  -3   0   14.30    1.39
  -8  -3   0   16.29    1.28
  -8  -3   0   15.22    1.28
   8   4   0    9.30    1.03
   8   4   0    9.70    0.93
   8   4   0    9.63    0.96
   8   4   0   10.24    0.89
   8   4   0    8.04    1.05
   8   4   0    8.45    1.11
   8   4   0    9.76    1.04
   8   4   0   10.28    1.19
  -8  -4   0    9.76    0.97
  -8  -4   0    9.52    0.97
  -8  -4   0    9.62    1.09
  -8  -4   0   11.65    1.09
  -8  -4   0   10.03    0.94
  -8  -4   0    9.75    1.22
   8   5   0    2.24    0.42
   8   5   0    1.39    0.47
   8   5   0    0.53    0.49
   8   5   0    2.81    0.77
   8   5   0    1.38    0.48
   8   5   0    2.36    0.49
   8   5   0    1.93    0.60
   8   5   0    0.93    0.47
  -8  -5   0    1.35    0.50
  -8  -5   0    1.43    0.49
  -8  -5   0    2.32    0.54
  -8  -5   0    1.78    0.57
  -8  -5   0    2.29    0.52
   8   6   0    6.24    1.01
   8   6   0    7.30    0.99
   8   6   0    6.96    0.83
   8   6   0    5.72    0.96
   8   6   0    6.61    1.12
   8   6   0    6.61    0.89
   8   6   0    5.95    0.71
  -8  -6   0    6.72    1.16
  -8  -6   0    5.74    0.71
  -8  -6   0    7.39    0.88
  -8  -6   0    6.82    1.03
  -8  -6   0    6.56    0.85
   8   7   0    4.49    0.74
   8   7   0    4.70    0.67
   8   7   0    4.51    0.60
   8   7   0    4.47    0.61
   8   7   0    4.25    0.77
   8   7   0    5.93    0.95
   8   7   0    3.86    0.63
  -8  -7   0    5.33    0.79
  -8  -7   0    4.97    0.83
  -8  -7   0    4.29    0.70
  -8  -7   0    2.87    0.63
   8   8   0   -0.57    0.46
   8   8   0    0.16    0.65
   8   8   0   -0.42    0.50
   8   8   0   -1.01    0.80
   8   8   0   -0.19    0.54
   8   8   0    0.24    0.71
   8   8   0   -0.15    0.48
   8   8   0   -0.57    0.36
  -8  -8   0   -0.01    0.57
  -8  -8   0    0.70    0.67
  -8  -8   0   -0.45    0.49
  -8  -8   0    0.47    0.73
   8   9   0    5.59    0.91
   8   9   0    4.57    0.96
   8   9   0    3.40    1.19
   8   9   0    4.43    0.99
  -8  -9   0    5.65    0.87
  -8  -9   0    6.55    0.99
  -8  -9   0    5.00    0.82
   8  10   0    0.80    0.74
   8  10   0    0.88    0.92
   8  10   0    0.95    0.65
   8  10   0    0.71    0.91
  -8 -10   0    1.04    0.86
  -8 -10   0    1.09    0.65
   8  11   0    1.87    0.74
   8  11   0    0.26    0.73
   8  11   0    1.08    1.05
  -8 -11   0    0.75    0.93
   8  12   0    1.17    0.82
   8  12   0    2.35    0.91
   8  12   0    1.78    1.15
  -8 -12   0    1.56    1.05
   9 -15   0   -0.07    0.87
   9 -15   0   -1.37    0.81
   9 -15   0    0.20    0.43
  -9  15   0   -0.21    0.40
  -9  15   0    0.69    0.98
  -9  15   0    0.47    0.70
   9 -14   0    0.52    0.75
   9 -14   0    0.55    0.39
   9 -14   0    0.50    0.82
  -9  14   0    0.45    0.69
  -9  14   0    0.40    0.37
  -9  14   0   -0.34    0.87
   9 -13   0    1.49    0.77
   9 -13   0    2.30    0.76
   9 -13   0    1.97    0.39
  -9  13   0    1.89    0.66
  -9  13   0    1.62    0.60
  -9  13   0    2.38    0.88
  -9  13   0    1.80    0.36
   9 -12   0   -0.32    1.36
   9 -12   0    0.40    0.30
   9 -12   0    0.05    0.60
   9 -12   0    0.03    0.66
  -9  12   0   -0.43    0.62
  -9  12   0   -0.05    0.28
  -9  12   0    0.42    0.56
  -9  12   0    0.29    0.29
  -9  12   0   -0.35    0.71
   9 -11   0   -0.46    0.80
   9 -11   0    0.70    0.30
   9 -11   0    0.59    0.53
   9 -11   0    0.20    0.60
  -9  11   0    1.07    0.26
  -9  11   0    0.53    0.59
  -9  11   0    1.30    0.74
  -9  11   0    0.50    0.55
  -9  11   0    0.81    0.26
   9 -10   0    0.22    0.71
   9 -10   0    0.63    0.54
   9 -10   0   -0.56    0.45
   9 -10   0   -0.13    0.28
  -9  10   0   -0.28    0.25
  -9  10   0   -0.14    0.51
  -9  10   0   -0.10    0.51
  -9  10   0    0.24    0.69
  -9  10   0    0.30    0.24
   9  -9   0    0.04    0.51
   9  -9   0    0.31    0.66
   9  -9   0    0.35    0.26
   9  -9   0   -0.28    1.39
  -9   9   0    0.72    0.62
  -9   9   0    0.19    0.24
  -9   9   0    0.06    0.22
  -9   9   0   -0.12    0.53
  -9   9   0    0.35    0.50
   9  -8   0   -0.51    0.63
   9  -8   0    0.07    0.63
   9  -8   0   -0.21    0.46
   9  -8   0   -0.54    0.41
  -9   8   0   -0.41    0.56
  -9   8   0   -0.56    0.31
  -9   8   0   -0.12    0.43
   9  -7   0   44.98    3.13
   9  -7   0   42.63    3.34
   9  -7   0   46.50    3.01
   9  -7   0   45.10    3.23
  -9   7   0   46.16    3.13
  -9   7   0   43.51    3.18
  -9   7   0   40.83    3.02
  -9   7   0   38.56    2.99
  -9   7   0   45.46    3.01
  -9   7   0   42.08    3.12
   9  -6   0   -0.17    0.24
   9  -6   0    0.62    0.35
   9  -6   0    0.33    0.41
   9  -6   0    0.18    0.25
   9  -6   0    0.23    0.56
   9  -6   0    0.33    0.53
  -9   6   0   -0.01    0.42
  -9   6   0   -0.48    0.20
  -9   6   0   -0.13    0.25
  -9   6   0    0.06    0.41
  -9   6   0    0.18    0.28
  -9   6   0   -0.02    0.23
   9  -5   0    2.31    0.59
   9  -5   0    1.35    0.30
   9  -5   0    2.29    0.44
   9  -5   0    2.17    0.30
   9  -5   0    1.31    0.64
   9  -5   0    1.89    0.54
  -9   5   0    1.90    0.50
  -9   5   0    1.45    0.51
  -9   5   0    1.44    0.29
  -9   5   0    1.25    0.29
  -9   5   0    1.62    0.26
  -9   5   0    1.40    0.32
   9  -4   0   84.23    5.60
   9  -4   0   80.15    5.67
   9  -4   0   84.63    5.59
   9  -4   0   85.96    5.68
   9  -4   0   78.21    5.56
   9  -4   0   79.12    5.75
  -9   4   0   77.18    5.56
  -9   4   0   77.80    5.63
  -9   4   0   83.06    5.58
  -9   4   0   80.91    5.57
  -9   4   0   82.74    5.65
   9  -3   0    0.13    0.50
   9  -3   0    0.26    0.30
   9  -3   0    0.29    0.50
   9  -3   0    0.37    0.27
   9  -3   0   -0.12    0.33
  -9   3   0    0.26    0.40
  -9   3   0    0.41    0.25
  -9   3   0    0.28    0.27
  -9   3   0    0.12    0.31
  -9   3   0    0.10    0.37
   9  -2   0   29.56    2.26
   9  -2   0   31.22    2.18
   9  -2   0   30.81    2.15
   9  -2   0   30.71    2.14
  -9   2   0   29.95    2.14
  -9   2   0   31.12    2.17
  -9   2   0   30.31    2.23
  -9   2   0   29.78    2.21
  -9   2   0   28.32    2.15
   9  -1   0    0.48    0.54
   9  -1   0    1.19    0.65
   9  -1   0    0.80    0.33
   9  -1   0    1.79    0.33
   9  -1   0    0.37    0.35
  -9   1   0    1.28    0.49
  -9   1   0    0.77    0.30
  -9   1   0    1.64    0.37
  -9   1   0    1.18    0.39
   9   0   0    0.13    0.31
   9   0   0   -0.10    0.33
   9   0   0   -0.30    0.56
   9   0   0    0.13    0.72
  -9   0   0   -0.75    0.45
  -9   0   0   -0.37    0.41
  -9   0   0   -0.29    0.37
  -9   0   0   -0.24    0.41
  -9   0   0    0.08    0.31
  -9   0   0    0.09    0.41
   9   1   0   21.47    1.46
   9   1   0   18.06    1.51
   9   1   0   17.44    1.39
   9   1   0   18.98    1.61
  -9  -1   0   19.29    1.70
  -9  -1   0   19.14    1.49
  -9  -1   0   19.62    1.45
  -9  -1   0   17.47    1.48
  -9  -1   0   18.21    1.49
   9   2   0    5.43    0.73
   9   2   0    6.69    0.85
   9   2   0    5.39    0.62
   9   2   0    5.08    0.90
   9   2   0    5.30    0.84
  -9  -2   0    4.48    0.66
  -9  -2   0    5.44    0.74
  -9  -2   0    6.35    0.81
  -9  -2   0    5.48    0.59
  -9  -2   0    6.41    0.80
  -9  -2   0    5.93    1.13
   9   3   0    1.26    0.47
   9   3   0    2.09    0.42
   9   3   0    2.10    0.36
   9   3   0    2.47    0.47
   9   3   0    1.50    1.03
   9   3   0    1.64    0.58
  -9  -3   0    1.74    0.57
  -9  -3   0    2.38    0.55
  -9  -3   0    1.88    0.47
  -9  -3   0    1.69    0.43
  -9  -3   0    2.31    0.47
  -9  -3   0    2.42    0.53
   9   4   0    0.15    0.47
   9   4   0    0.20    0.33
   9   4   0   -0.65    0.40
   9   4   0    0.32    0.66
   9   4   0    0.03    0.54
   9   4   0    0.01    0.45
  -9  -4   0   -0.26    0.40
  -9  -4   0   -0.76    0.42
  -9  -4   0    0.60    0.50
  -9  -4   0    0.16    0.43
  -9  -4   0   -0.25    0.52
  -9  -4   0   -0.27    0.52
   9   5   0    0.77    0.76
   9   5   0    0.03    0.48
   9   5   0    0.55    0.38
   9   5   0    0.53    0.59
   9   5   0    0.57    0.47
   9   5   0    0.72    0.51
  -9  -5   0   -0.05    0.49
  -9  -5   0    0.43    0.57
  -9  -5   0    0.90    0.63
  -9  -5   0    0.69    0.49
  -9  -5   0    0.07    0.50
   9   6   0    1.62    0.46
   9   6   0    1.10    0.52
   9   6   0    2.30    0.66
   9   6   0    2.81    0.61
   9   6   0    1.84    0.57
   9   6   0    1.58    0.80
  -9  -6   0    1.06    0.56
  -9  -6   0    1.65    0.65
  -9  -6   0    1.51    0.58
  -9  -6   0    1.52    0.56
  -9  -6   0    1.69    0.63
   9   7   0    2.21    0.68
   9   7   0    3.30    0.91
   9   7   0    3.14    0.76
   9   7   0    3.15    0.51
   9   7   0    3.08    0.65
   9   7   0    1.80    0.55
   9   7   0    1.49    0.55
  -9  -7   0    2.24    0.63
  -9  -7   0    2.86    0.71
  -9  -7   0    2.27    0.74
  -9  -7   0    2.62    1.06
   9   8   0   -0.61    0.70
   9   8   0   -0.26    0.54
   9   8   0   -0.95    0.68
   9   8   0   -0.03    0.87
   9   8   0   -0.71    0.76
   9   8   0   -0.58    0.52
  -9  -8   0   -0.17    0.70
  -9  -8   0    0.51    0.77
   9   9   0    2.00    0.90
   9   9   0    1.71    0.64
   9   9   0    1.84    0.93
   9   9   0    1.97    0.95
  -9  -9   0    1.76    0.72
  -9  -9   0    2.88    0.85
   9  10   0    0.78    0.81
   9  10   0    1.71    1.07
   9  10   0    1.84    0.71
  -9 -10   0    0.22    0.87
   9  11   0   -0.87    1.08
   9  11   0    0.09    0.94
   9  11   0    0.42    0.77
  -9 -11   0    1.11    1.04
  -9 -11   0    0.68    0.65
  -9 -12   0    0.18    0.78
  10 -15   0    1.47    0.49
  10 -15   0    3.36    1.01
 -10  15   0    2.63    0.80
 -10  15   0    2.42    0.46
 -10  15   0    2.81    1.14
  10 -14   0    1.23    0.83
  10 -14   0    0.11    0.42
 -10  14   0    0.05    0.36
 -10  14   0    0.44    0.94
 -10  14   0    0.60    0.76
  10 -13   0    2.79    0.84
  10 -13   0    2.44    1.13
  10 -13   0    2.46    0.44
 -10  13   0    1.68    0.75
 -10  13   0    3.08    0.94
 -10  13   0    2.85    0.42
 -10  13   0    3.23    0.71
  10 -12   0   -0.45    0.67
  10 -12   0   -0.13    0.33
  10 -12   0    0.09    0.62
 -10  12   0   -0.68    0.29
 -10  12   0   -0.84    0.60
 -10  12   0   -1.58    0.76
 -10  12   0   -1.00    0.65
 -10  12   0   -0.61    0.30
  10 -11   0    0.37    0.64
  10 -11   0    0.50    0.33
  10 -11   0    0.81    0.86
  10 -11   0    1.14    0.56
 -10  11   0    0.16    0.61
 -10  11   0    0.44    0.77
 -10  11   0    0.38    0.30
 -10  11   0    0.05    0.61
 -10  11   0    0.41    0.27
  10 -10   0    3.03    0.41
  10 -10   0    2.64    0.87
  10 -10   0    3.51    0.69
  10 -10   0    3.94    0.58
 -10  10   0    2.78    0.37
 -10  10   0    3.35    0.72
 -10  10   0    3.08    0.78
 -10  10   0    3.07    0.36
 -10  10   0    1.25    0.65
  10  -9   0    2.97    0.66
  10  -9   0    2.82    0.83
  10  -9   0    2.77    0.39
 -10   9   0    2.89    0.34
 -10   9   0    2.79    0.71
 -10   9   0    2.63    0.60
 -10   9   0    3.06    1.11
 -10   9   0    3.27    0.37
  10  -8   0    5.98    0.59
  10  -8   0    5.43    0.91
  10  -8   0    5.60    0.96
 -10   8   0    5.85    0.93
 -10   8   0    4.90    0.54
 -10   8   0    6.28    0.62
 -10   8   0    6.54    0.61
 -10   8   0    6.89    1.04
  10  -7   0   -0.01    0.26
  10  -7   0   -0.43    0.45
  10  -7   0   -0.66    0.61
  10  -7   0   -0.30    0.26
 -10   7   0   -0.03    0.30
 -10   7   0   -0.39    0.43
 -10   7   0   -0.31    0.65
 -10   7   0   -0.23    0.24
  10  -6   0    4.11    0.81
  10  -6   0    2.25    0.69
  10  -6   0    3.00    0.73
  10  -6   0    4.30    0.57
  10  -6   0    2.57    0.38
 -10   6   0    2.92    0.55
 -10   6   0    3.13    0.35
 -10   6   0    4.07    0.62
 -10   6   0    2.99    0.46
 -10   6   0    2.18    0.41
 -10   6   0    2.64    0.33
  10  -5   0    2.35    0.68
  10  -5   0    2.12    0.37
  10  -5   0    1.62    0.47
  10  -5   0    2.35    0.61
  10  -5   0    2.58    0.49
 -10   5   0    2.87    0.66
 -10   5   0    2.60    0.36
 -10   5   0    2.39    0.56
 -10   5   0    2.09    0.33
 -10   5   0    1.99    0.47
  10  -4   0   18.39    1.46
  10  -4   0   17.51    1.73
  10  -4   0   18.47    1.45
  10  -4   0   19.43    1.59
  10  -4   0   18.13    1.66
 -10   4   0   19.48    1.55
 -10   4   0   18.23    1.41
 -10   4   0   18.50    1.38
  10  -3   0   27.22    2.03
  10  -3   0   27.37    2.17
  10  -3   0   27.82    2.19
  10  -3   0   27.70    2.02
  10  -3   0   26.90    2.30
  10  -3   0   28.09    2.07
 -10   3   0   29.49    2.03
 -10   3   0   28.91    2.13
 -10   3   0   27.75    2.10
 -10   3   0   28.77    2.04
 -10   3   0   28.39    2.02
  10  -2   0    2.02    0.36
  10  -2   0    1.39    0.36
  10  -2   0    1.73    0.60
  10  -2   0    1.36    0.41
  10  -2   0    0.75    0.61
 -10   2   0    1.43    0.46
 -10   2   0    1.49    0.57
 -10   2   0    1.58    0.35
 -10   2   0    1.59    0.41
 -10   2   0    2.03    0.36
  10  -1   0   26.57    2.13
  10  -1   0   27.24    2.07
  10  -1   0   30.02    2.20
  10  -1   0   32.43    2.04
  10  -1   0   28.79    2.22
 -10   1   0   28.14    2.08
 -10   1   0   26.99    2.05
 -10   1   0   27.96    2.12
 -10   1   0   27.76    2.14
  10   0   0    2.37    0.56
  10   0   0    1.63    0.46
 -10   0   0    2.22    0.60
 -10   0   0    2.13    0.56
 -10   0   0    2.53    0.55
 -10   0   0    2.86    0.43
 -10   0   0    2.60    0.62
 -10   0   0    2.97    0.49
  10   1   0    2.29    0.58
  10   1   0    2.39    0.70
  10   1   0    1.43    0.46
  10   1   0    1.13    0.45
 -10  -1   0    1.16    0.59
 -10  -1   0    1.22    0.42
 -10  -1   0    1.41    0.46
 -10  -1   0    0.84    0.49
 -10  -1   0    2.18    0.43
  10   2   0   -0.01    0.42
  10   2   0    0.05    0.53
  10   2   0   -0.69    0.67
  10   2   0    0.15    0.45
  10   2   0    0.06    0.30
 -10  -2   0   -0.32    0.52
 -10  -2   0   -0.28    0.58
 -10  -2   0   -0.56    0.40
 -10  -2   0    0.16    0.46
 -10  -2   0    0.02    0.39
  10   3   0    2.34    0.63
  10   3   0    2.31    0.80
  10   3   0    1.27    0.50
  10   3   0    1.81    0.37
  10   3   0    2.24    0.51
 -10  -3   0    1.95    0.56
 -10  -3   0    1.75    0.53
 -10  -3   0    1.73    0.48
 -10  -3   0    1.48    0.66
 -10  -3   0    1.35    0.52
 -10  -3   0    1.84    0.50
  10   4   0    9.09    0.86
  10   4   0   10.32    1.16
  10   4   0   10.33    1.28
  10   4   0    9.63    1.17
 -10  -4   0    9.57    1.45
 -10  -4   0    7.36    0.99
 -10  -4   0    6.96    1.00
 -10  -4   0    6.95    1.12
 -10  -4   0    7.04    1.05
 -10  -4   0    8.41    1.01
  10   5   0   -0.06    0.52
  10   5   0    0.41    0.40
  10   5   0    0.85    0.67
  10   5   0    0.93    0.83
  10   5   0    0.71    0.63
 -10  -5   0    0.42    0.55
 -10  -5   0    0.34    0.64
 -10  -5   0   -0.53    0.64
 -10  -5   0    0.42    0.55
 -10  -5   0   -0.08    0.45
  10   6   0   12.89    1.31
  10   6   0   11.56    1.59
  10   6   0   14.71    1.72
  10   6   0   12.74    1.39
  10   6   0   11.17    1.21
  10   6   0   14.24    1.64
 -10  -6   0   13.86    1.70
 -10  -6   0   12.44    1.37
 -10  -6   0   12.59    1.61
 -10  -6   0   10.79    1.40
 -10  -6   0   13.85    1.28
  10   7   0    2.03    0.57
  10   7   0    1.49    0.58
  10   7   0    0.16    1.14
  10   7   0    1.55    0.77
  10   7   0    1.42    0.92
  10   7   0    1.48    0.82
  10   7   0    2.04    0.53
 -10  -7   0    1.35    0.62
 -10  -7   0    2.34    0.71
 -10  -7   0    1.85    0.81
 -10  -7   0    1.21    0.82
  10   8   0    3.09    1.01
  10   8   0    3.17    0.96
  10   8   0    2.86    1.01
  10   8   0    2.14    0.65
 -10  -8   0    1.92    0.70
 -10  -8   0    3.43    1.29
 -10  -8   0    2.94    0.95
  10   9   0    1.19    1.01
  10   9   0    2.96    1.20
  10   9   0    2.25    0.93
 -10  -9   0    2.56    0.72
 -10  -9   0    2.26    1.02
  10  10   0    1.86    1.13
 -10 -10   0    2.11    1.09
  10  11   0   -0.36    1.45
 -10 -11   0   -0.69    1.18
  11 -14   0    1.27    0.46
  11 -14   0    0.14    0.88
 -11  14   0    1.07    0.81
 -11  14   0    1.25    0.43
 -11  14   0    1.36    1.03
  11 -13   0   -0.05    0.79
  11 -13   0    0.18    0.42
 -11  13   0    0.24    0.88
 -11  13   0    0.03    0.74
 -11  13   0    1.16    0.68
 -11  13   0    0.74    0.39
  11 -12   0    0.50    0.72
  11 -12   0    0.18    0.39
 -11  12   0   -0.23    0.43
 -11  12   0    0.54    0.37
 -11  12   0    0.89    0.72
 -11  12   0   -0.69    0.67
 -11  12   0    1.21    0.81
  11 -11   0    2.81    0.75
  11 -11   0    2.29    1.09
  11 -11   0    3.13    0.44
  11 -11   0    4.12    0.86
 -11  11   0    3.27    0.43
 -11  11   0    2.99    0.81
 -11  11   0    2.82    0.74
 -11  11   0    2.86    0.42
 -11  11   0    4.28    0.85
  11 -10   0    1.69    0.52
  11 -10   0    1.40    0.67
  11 -10   0    1.01    0.34
  11 -10   0    0.18    0.84
 -11  10   0    1.12    0.66
 -11  10   0    1.09    0.34
 -11  10   0    1.31    0.31
 -11  10   0    1.52    0.68
 -11  10   0    1.21    0.73
  11  -9   0   12.01    1.64
  11  -9   0   13.38    1.08
 -11   9   0   13.74    1.05
 -11   9   0   13.80    1.07
 -11   9   0   14.06    1.36
 -11   9   0   14.32    1.39
  11  -8   0    0.06    0.30
  11  -8   0   -0.22    0.72
  11  -8   0   -0.38    0.58
 -11   8   0    0.00    0.23
 -11   8   0    0.52    0.33
 -11   8   0    0.11    0.26
 -11   8   0   -0.19    0.58
 -11   8   0    0.60    0.62
  11  -7   0   20.24    1.51
  11  -7   0   22.11    1.73
  11  -7   0   22.54    1.89
  11  -7   0   21.70    1.84
 -11   7   0   20.23    1.49
 -11   7   0   20.77    1.50
 -11   7   0   20.42    1.69
 -11   7   0   17.52    1.47
 -11   7   0   21.15    1.72
  11  -6   0    0.04    0.50
  11  -6   0    0.79    0.71
  11  -6   0    1.18    0.66
  11  -6   0    0.71    0.33
  11  -6   0    0.56    0.32
 -11   6   0    1.46    0.32
 -11   6   0    0.92    0.60
 -11   6   0    0.41    0.26
 -11   6   0    0.48    0.57
 -11   6   0    0.77    0.31
  11  -5   0    7.19    1.09
  11  -5   0    7.32    0.76
  11  -5   0    6.43    0.93
  11  -5   0    8.45    0.83
 -11   5   0    6.76    0.70
 -11   5   0    8.23    0.78
 -11   5   0    7.86    1.00
 -11   5   0    6.07    0.84
 -11   5   0    7.51    0.75
  11  -4   0   11.00    1.25
  11  -4   0   11.66    1.00
  11  -4   0    8.61    1.30
  11  -4   0   11.61    1.07
  11  -4   0   10.37    1.05
 -11   4   0   11.77    1.18
 -11   4   0   12.50    1.01
 -11   4   0   11.52    0.96
 -11   4   0   11.63    0.96
 -11   4   0   11.69    1.20
  11  -3   0    9.04    0.85
  11  -3   0    9.05    1.13
  11  -3   0    7.51    1.18
  11  -3   0    9.09    0.89
  11  -3   0    7.64    0.97
 -11   3   0    8.48    0.85
 -11   3   0    8.48    1.06
 -11   3   0    9.85    0.85
 -11   3   0    9.17    1.06
 -11   3   0    9.31    0.87
  11  -2   0    0.85    0.60
  11  -2   0    1.70    0.35
  11  -2   0    0.49    0.65
  11  -2   0    0.61    0.37
  11  -2   0    0.46    0.44
 -11   2   0    0.75    0.42
 -11   2   0    0.54    0.35
 -11   2   0   -0.14    0.54
 -11   2   0    0.73    0.34
 -11   2   0    0.17    0.51
  11  -1   0   13.55    1.40
  11  -1   0    9.62    1.40
  11  -1   0   12.98    1.14
  11  -1   0   14.80    1.32
 -11   1   0   15.95    1.16
 -11   1   0   10.84    1.19
 -11   1   0   12.94    1.13
 -11   1   0   12.86    1.26
  11   0   0    0.98    0.43
  11   0   0    1.48    0.72
  11   0   0    2.30    0.58
  11   0   0    0.81    0.48
 -11   0   0    1.30    0.45
 -11   0   0    1.32    0.56
 -11   0   0    0.92    0.41
 -11   0   0    0.31    0.55
 -11   0   0    1.80    0.57
  11   1   0    2.78    0.60
  11   1   0    5.96    0.92
  11   1   0    5.52    0.88
 -11  -1   0    4.04    0.72
 -11  -1   0    4.22    0.58
 -11  -1   0    3.06    0.53
 -11  -1   0    4.29    0.74
 -11  -1   0    5.85    0.82
  11   2   0    1.83    0.69
  11   2   0    2.07    0.61
  11   2   0    0.87    0.52
  11   2   0    0.38    0.78
 -11  -2   0    0.69    0.46
 -11  -2   0    1.28    0.56
 -11  -2   0    1.06    0.54
 -11  -2   0    1.71    0.74
 -11  -2   0    1.65    0.55
  11   3   0    2.29    0.69
  11   3   0    2.34    0.85
  11   3   0    0.60    0.57
 -11  -3   0    0.86    0.78
 -11  -3   0    0.73    0.61
 -11  -3   0    1.46    0.83
 -11  -3   0    0.96    0.45
  11   4   0   -0.49    0.77
  11   4   0    0.53    0.67
  11   4   0   -0.86    0.68
  11   4   0   -1.92    0.68
 -11  -4   0   -0.08    0.46
 -11  -4   0   -0.40    0.82
 -11  -4   0   -0.05    0.57
 -11  -4   0   -0.81    0.62
 -11  -4   0    0.43    0.76
 -11  -4   0   -1.23    0.69
  11   5   0    3.70    1.01
  11   5   0    3.67    0.69
  11   5   0    3.89    0.78
 -11  -5   0    3.88    0.80
 -11  -5   0    2.30    0.62
 -11  -5   0    3.54    0.71
 -11  -5   0    3.04    0.70
 -11  -5   0    5.10    1.01
  11   6   0    0.42    0.64
  11   6   0    1.21    0.95
  11   6   0    1.77    0.78
 -11  -6   0    1.25    0.69
 -11  -6   0    1.34    0.68
 -11  -6   0    2.62    1.06
 -11  -6   0    2.58    0.82
  11   7   0    0.46    0.63
  11   7   0   -0.19    0.97
  11   7   0    1.92    0.58
  11   7   0    1.75    0.89
 -11  -7   0    0.28    1.44
 -11  -7   0    1.43    0.84
 -11  -7   0    0.49    0.79
 -11  -7   0    0.24    0.64
  11   8   0    4.22    1.18
  11   8   0    3.18    1.06
 -11  -8   0    2.58    0.80
 -11  -8   0    2.70    1.04
  11   9   0    1.83    1.12
 -11  -9   0   -0.72    1.03
 -11  -9   0    0.51    0.75
  11  10   0    4.55    1.44
  12 -14   0    4.99    0.60
  12 -14   0    3.07    1.04
 -12  14   0    4.78    0.99
 -12  14   0    2.22    1.06
 -12  14   0    4.45    1.12
 -12  14   0    3.74    0.57
  12 -13   0   -0.01    0.41
  12 -13   0   -0.60    0.86
 -12  13   0    0.94    0.71
 -12  13   0    0.16    0.96
 -12  13   0   -0.25    0.83
 -12  13   0    0.01    0.41
  12 -12   0    2.74    0.87
  12 -12   0    3.18    0.45
 -12  12   0    1.89    0.89
 -12  12   0    2.59    0.85
 -12  12   0    2.95    0.45
 -12  12   0    2.66    0.81
  12 -11   0    0.80    0.76
  12 -11   0    0.92    0.40
 -12  11   0    2.02    0.78
 -12  11   0    1.83    0.38
 -12  11   0    1.04    0.79
  12 -10   0   -0.65    0.94
  12 -10   0    0.36    0.69
  12 -10   0    0.93    0.35
 -12  10   0    1.31    0.33
 -12  10   0    0.04    0.69
 -12  10   0    1.30    0.75
  12  -9   0    0.20    0.69
  12  -9   0    0.39    0.34
  12  -9   0    1.08    0.83
  12  -9   0   -0.20    0.89
 -12   9   0    0.68    0.30
 -12   9   0    0.11    0.67
 -12   9   0    0.90    0.69
  12  -8   0    0.56    0.81
  12  -8   0    0.40    0.64
  12  -8   0    0.80    0.36
  12  -8   0    0.40    0.76
 -12   8   0    0.76    0.31
 -12   8   0    0.98    0.66
 -12   8   0    1.56    0.33
 -12   8   0    0.84    0.67
  12  -7   0    1.88    0.39
  12  -7   0    0.42    0.60
  12  -7   0    1.79    0.79
 -12   7   0    1.56    0.61
 -12   7   0    1.99    0.36
 -12   7   0    1.78    0.36
 -12   7   0    1.52    0.66
  12  -6   0    4.40    0.84
  12  -6   0    4.66    0.77
  12  -6   0    4.58    0.54
  12  -6   0    3.69    0.66
 -12   6   0    5.32    0.81
 -12   6   0    4.88    0.66
 -12   6   0    6.76    0.88
  12  -5   0   11.38    1.00
  12  -5   0    9.36    0.91
  12  -5   0    6.97    1.06
  12  -5   0    9.74    1.24
 -12   5   0    8.87    0.89
 -12   5   0    9.37    0.82
 -12   5   0   10.16    1.18
 -12   5   0    9.25    0.94
 -12   5   0   10.02    1.15
  12  -4   0   -0.93    0.68
  12  -4   0    0.62    0.36
  12  -4   0   -0.01    0.69
  12  -4   0   -0.01    0.41
  12  -4   0   -0.59    0.43
 -12   4   0   -0.50    0.58
 -12   4   0    0.25    0.37
 -12   4   0   -0.29    0.35
 -12   4   0    0.34    0.36
 -12   4   0   -0.12    0.60
  12  -3   0    2.90    0.52
  12  -3   0    3.18    0.76
  12  -3   0    1.32    0.72
  12  -3   0    5.09    0.67
 -12   3   0    2.57    0.43
 -12   3   0    2.96    0.66
 -12   3   0    3.15    0.51
 -12   3   0    2.39    0.44
 -12   3   0    2.46    0.64
  12  -2   0    0.72    0.75
  12  -2   0    0.17    0.46
  12  -2   0   -0.18    0.62
  12  -2   0    0.20    0.40
 -12   2   0    0.01    0.43
 -12   2   0    0.62    0.37
 -12   2   0   -0.20    0.61
 -12   2   0    0.13    0.36
 -12   2   0   -0.41    0.60
  12  -1   0    9.53    1.17
  12  -1   0    9.56    0.95
  12  -1   0    7.83    1.28
 -12   1   0    7.79    0.89
 -12   1   0    6.10    1.09
 -12   1   0    8.50    1.10
 -12   1   0    7.88    0.94
  12   0   0    0.87    0.76
  12   0   0    1.35    0.48
  12   0   0    1.02    0.59
  12   0   0   -0.42    0.52
 -12   0   0    0.29    0.57
 -12   0   0    0.79    0.48
 -12   0   0   -0.30    0.52
 -12   0   0   -0.79    0.54
 -12   0   0    0.21    0.45
  12   1   0    2.67    0.68
  12   1   0    3.02    0.54
  12   1   0    2.74    0.81
 -12  -1   0    1.27    0.45
 -12  -1   0    0.83    0.68
 -12  -1   0    0.60    0.60
 -12  -1   0    1.32    0.51
  12   2   0   -0.32    0.83
  12   2   0    1.78    0.67
  12   2   0    0.04    0.52
 -12  -2   0   -0.57    0.65
 -12  -2   0   -0.46    0.55
 -12  -2   0   -1.16    1.05
 -12  -2   0   -0.06    0.49
  12   3   0    5.64    0.73
  12   3   0    4.82    1.03
 -12  -3   0    4.25    0.72
 -12  -3   0    4.90    0.84
 -12  -3   0    4.52    0.81
 -12  -3   0    4.99    0.77
  12   4   0    0.47    0.87
  12   4   0    1.24    0.75
  12   4   0    0.01    0.57
 -12  -4   0   -0.42    0.63
 -12  -4   0   -0.33    0.64
 -12  -4   0   -0.12    0.58
 -12  -4   0   -0.27    0.65
  12   5   0    2.07    0.80
  12   5   0    1.66    0.66
  12   5   0    0.27    0.97
 -12  -5   0    0.49    0.72
 -12  -5   0    0.55    0.69
 -12  -5   0    1.43    0.71
  12   6   0    0.80    0.87
  12   6   0   -0.18    0.68
  12   6   0    0.85    0.63
  12   6   0   -1.42    0.97
 -12  -6   0    0.45    0.73
 -12  -6   0    0.27    0.78
 -12  -6   0   -1.05    0.74
  12   7   0    4.90    1.19
  12   7   0    5.39    1.21
 -12  -7   0    3.69    1.04
 -12  -7   0    3.98    0.85
  12   8   0    1.82    1.19
 -12  -8   0   -0.20    0.84
 -12  -8   0   -1.14    0.98
  13 -13   0    1.46    0.47
  13 -13   0    2.04    0.92
 -13  13   0    1.96    0.89
 -13  13   0    1.55    0.92
 -13  13   0    1.84    0.45
  13 -12   0    2.17    1.01
  13 -12   0    3.13    0.51
 -13  12   0    3.99    0.48
 -13  12   0    3.87    0.90
 -13  12   0    4.20    0.96
  13 -11   0   -0.44    0.83
  13 -11   0   -0.15    0.40
 -13  11   0   -0.54    0.78
 -13  11   0   -0.16    0.80
 -13  11   0   -0.45    0.33
  13 -10   0    2.64    1.68
  13 -10   0    3.33    0.91
  13 -10   0    5.93    1.11
  13 -10   0    5.75    0.72
 -13  10   0    3.52    0.87
 -13  10   0    3.84    0.88
 -13  10   0    4.51    0.63
  13  -9   0   -1.37    0.96
  13  -9   0   -0.76    0.74
  13  -9   0    0.04    0.84
  13  -9   0   -0.41    0.38
 -13   9   0    0.26    0.74
 -13   9   0    0.17    0.76
 -13   9   0   -0.01    0.34
  13  -8   0    3.10    0.50
  13  -8   0    3.63    0.89
 -13   8   0    3.64    0.48
 -13   8   0    3.57    0.83
 -13   8   0    3.80    0.76
  13  -7   0   -0.56    0.85
  13  -7   0    0.58    0.41
  13  -7   0    1.12    0.81
  13  -7   0   -0.70    0.62
 -13   7   0    1.16    0.38
 -13   7   0    0.91    0.72
 -13   7   0    0.27    0.72
  13  -6   0    5.54    0.83
  13  -6   0    8.08    1.22
  13  -6   0    7.65    1.09
 -13   6   0    6.09    0.96
 -13   6   0    7.06    1.00
 -13   6   0    6.55    0.79
  13  -5   0    2.02    0.44
  13  -5   0    1.06    0.58
  13  -5   0    1.52    0.82
  13  -5   0    0.44    0.83
 -13   5   0    1.16    0.63
 -13   5   0    2.58    0.38
 -13   5   0    1.79    0.42
 -13   5   0    2.21    0.65
  13  -4   0    1.09    0.79
  13  -4   0    2.24    0.84
 -13   4   0    2.44    0.69
 -13   4   0    2.52    0.45
 -13   4   0    2.34    0.68
 -13   4   0    3.04    0.47
  13  -3   0    4.66    0.90
  13  -3   0    6.96    0.84
  13  -3   0    6.44    1.02
 -13   3   0    7.16    1.07
 -13   3   0    6.25    0.98
 -13   3   0    5.33    0.79
  13  -2   0    8.54    0.93
  13  -2   0    8.01    1.32
  13  -2   0    8.62    1.25
 -13   2   0    5.68    0.94
 -13   2   0   10.65    0.91
 -13   2   0    5.61    1.01
 -13   2   0    9.24    0.95
  13  -1   0    6.68    1.12
  13  -1   0    7.38    0.90
  13  -1   0    5.37    1.00
 -13   1   0    6.97    0.86
 -13   1   0    5.04    0.89
 -13   1   0    5.96    0.87
 -13   1   0    3.70    0.81
  13   0   0    3.62    0.92
  13   0   0    3.74    0.61
  13   0   0    5.75    1.08
 -13   0   0    1.75    0.66
 -13   0   0    2.18    0.69
 -13   0   0    4.00    0.61
  13   1   0    4.65    1.03
  13   1   0    5.16    0.69
 -13  -1   0    4.54    0.76
 -13  -1   0    3.65    0.84
 -13  -1   0    2.72    0.74
 -13  -1   0    4.40    0.66
  13   2   0    1.05    0.91
  13   2   0    1.67    0.62
 -13  -2   0    0.10    0.66
 -13  -2   0    1.19    0.73
 -13  -2   0    1.39    0.63
 -13  -2   0    0.87    0.56
  13   3   0    8.15    1.16
  13   3   0    8.28    1.28
 -13  -3   0    6.86    1.14
 -13  -3   0   10.00    1.20
 -13  -3   0    7.93    1.22
 -13  -3   0    6.50    0.87
  13   4   0    1.38    0.98
  13   4   0   -0.77    0.61
  13   4   0    1.68    0.90
 -13  -4   0    0.11    0.78
 -13  -4   0   -0.45    0.71
 -13  -4   0   -0.10    0.63
 -13  -4   0   -0.30    0.65
  13   5   0    0.39    0.69
  13   5   0    2.22    1.34
  13   5   0   -0.17    1.09
 -13  -5   0    1.17    0.76
 -13  -5   0    0.64    0.79
 -13  -5   0    0.30    0.80
  13   6   0    0.45    0.69
  13   6   0    1.57    0.70
  13   6   0   -0.84    1.09
 -13  -6   0    0.69    0.79
 -13  -6   0    0.85    0.86
 -13  -6   0    0.61    0.85
  13   7   0    2.32    1.23
 -13  -7   0    3.77    1.05
 -13  -7   0    2.37    0.91
  14 -12   0    0.29    0.47
  14 -12   0   -0.02    1.15
  14 -12   0   -0.75    1.01
 -14  12   0    1.01    0.92
 -14  12   0    0.21    0.93
 -14  12   0    0.37    0.41
  14 -11   0   -1.10    0.95
  14 -11   0   -0.05    0.47
  14 -11   0   -0.05    1.08
 -14  11   0   -0.11    0.93
 -14  11   0    0.35    0.40
 -14  11   0    0.63    0.90
  14 -10   0    0.17    0.47
  14 -10   0    0.45    1.00
 -14  10   0   -0.06    0.82
 -14  10   0   -1.24    0.76
 -14  10   0   -0.09    0.40
  14  -9   0    0.35    0.91
  14  -9   0    0.09    0.46
  14  -9   0   -2.01    1.16
 -14   9   0    0.26    0.41
 -14   9   0    1.28    0.84
 -14   9   0    0.51    0.82
  14  -8   0    1.35    0.88
  14  -8   0    0.80    0.47
  14  -8   0   -1.14    1.02
 -14   8   0    1.33    0.83
 -14   8   0    1.33    0.80
 -14   8   0    1.34    0.42
  14  -7   0    1.04    0.48
  14  -7   0    1.22    0.84
 -14   7   0    0.67    0.77
 -14   7   0    1.07    0.42
 -14   7   0    1.21    0.68
  14  -6   0    0.78    0.43
  14  -6   0    0.44    0.83
 -14   6   0    0.68    0.66
 -14   6   0    1.08    0.78
 -14   6   0    0.34    0.41
  14  -5   0    1.34    0.84
  14  -5   0    0.82    0.45
 -14   5   0    1.74    0.69
 -14   5   0    1.30    0.78
 -14   5   0    1.37    0.45
  14  -4   0    1.11    0.94
  14  -4   0    0.41    0.87
  14  -4   0    0.49    0.46
 -14   4   0    1.32    0.42
 -14   4   0    1.29    0.69
 -14   4   0    1.85    0.79
  14  -3   0    0.54    0.77
  14  -3   0   -0.15    0.84
  14  -3   0    1.11    0.44
 -14   3   0    0.12    0.71
 -14   3   0   -0.51    0.64
 -14   3   0    1.02    0.46
  14  -2   0    0.99    0.50
  14  -2   0    0.73    0.90
  14  -2   0    1.73    0.74
 -14   2   0    1.13    0.68
 -14   2   0    0.17    0.68
 -14   2   0    0.61    0.50
 -14   2   0    1.87    0.51
  14  -1   0    1.94    0.74
  14  -1   0   -0.71    0.95
  14  -1   0   -0.05    0.52
 -14   1   0   -0.17    0.52
 -14   1   0   -0.76    0.63
 -14   1   0   -1.07    0.63
 -14   1   0    0.95    0.54
  14   0   0    8.19    1.12
  14   0   0    9.61    1.53
 -14   0   0    8.66    1.09
 -14   0   0    5.57    0.93
  14   1   0    1.30    1.02
  14   1   0    2.13    0.87
  14   1   0   -0.24    0.59
 -14  -1   0    0.16    0.62
 -14  -1   0    0.79    0.58
 -14  -1   0    0.80    0.79
 -14  -1   0   -0.63    0.64
  14   2   0    0.95    0.64
  14   2   0    1.39    1.11
 -14  -2   0   -0.03    0.78
 -14  -2   0   -0.11    0.72
 -14  -2   0    1.33    0.63
  14   3   0    1.22    0.71
  14   3   0    0.85    1.11
 -14  -3   0    0.63    0.65
 -14  -3   0   -0.43    0.69
 -14  -3   0    0.23    0.69
 -14  -3   0    0.64    0.75
  14   4   0    0.57    1.07
  14   4   0    0.26    0.76
 -14  -4   0    0.66    0.83
 -14  -4   0    0.73    0.76
 -14  -4   0    0.07    0.80
  14   5   0    0.06    0.77
  14   5   0   -2.53    1.13
 -14  -5   0   -0.66    0.84
 -14  -5   0    0.27    0.89
 -14  -5   0    0.16    0.83
  14   6   0    2.16    0.89
  14   6   0    2.07    1.73
 -14  -6   0    2.35    1.02
 -14  -6   0    1.76    0.99
 -15  11   0    2.58    1.00
  15 -10   0    0.14    1.10
  15 -10   0   -0.37    0.53
 -15  10   0   -0.55    0.49
 -15  10   0   -0.54    0.86
 -15  10   0   -1.26    0.92
  15  -9   0    0.29    0.91
  15  -9   0    0.05    0.51
 -15   9   0   -0.40    0.47
 -15   9   0   -0.47    0.93
 -15   9   0   -0.47    0.79
  15  -8   0    0.18    0.49
  15  -8   0    0.44    1.01
 -15   8   0    0.29    0.90
 -15   8   0    1.13    0.90
 -15   8   0    0.26    0.47
  15  -7   0   -0.89    0.97
  15  -7   0   -0.55    0.46
 -15   7   0   -0.67    0.84
 -15   7   0    0.04    0.71
 -15   7   0   -0.30    0.45
  15  -6   0   -0.62    0.97
  15  -6   0   -0.74    0.47
 -15   6   0   -0.40    0.44
 -15   6   0   -0.21    0.70
 -15   6   0   -1.02    0.79
  15  -5   0    0.04    1.00
  15  -5   0   -1.57    1.01
  15  -5   0    0.62    0.50
 -15   5   0    1.37    0.86
 -15   5   0    0.59    0.45
 -15   5   0   -0.05    0.82
  15  -4   0    7.10    0.98
  15  -4   0    6.56    1.21
  15  -4   0    3.49    1.12
 -15   4   0    5.17    0.68
 -15   4   0    8.46    1.34
 -15   4   0    5.70    0.95
  15  -3   0    1.36    1.11
  15  -3   0    0.17    0.54
  15  -3   0    0.27    0.99
 -15   3   0    1.22    0.78
 -15   3   0    0.78    0.81
 -15   3   0    0.55    0.52
  15  -2   0    5.53    1.11
  15  -2   0    2.11    0.65
 -15   2   0    3.12    0.65
 -15   2   0    3.83    0.86
 -15   2   0    4.48    0.90
  15  -1   0    1.22    1.05
  15  -1   0    1.20    0.63
 -15   1   0    0.61    0.61
 -15   1   0    2.14    0.61
 -15   1   0    1.02    0.77
 -15   1   0    2.01    0.80
  15   0   0    6.04    1.23
  15   0   0    6.73    0.86
 -15   0   0    5.65    0.81
 -15   0   0    5.71    0.99
 -15   0   0    5.56    1.05
  15   1   0    3.36    1.19
  15   1   0    4.12    0.81
 -15  -1   0    4.06    0.75
 -15  -1   0    4.64    0.74
 -15  -1   0    2.94    0.90
 -15  -1   0    4.98    1.03
  15   2   0    1.83    0.75
  15   2   0    1.52    1.20
 -15  -2   0    1.50    0.92
 -15  -2   0    1.83    0.90
 -15  -2   0    2.11    0.71
 -15  -2   0    3.16    0.76
  15   3   0    2.36    0.78
  15   3   0    0.95    1.15
 -15  -3   0    1.54    0.75
 -15  -3   0    2.90    0.79
 -15  -3   0    1.33    0.88
 -15  -3   0    2.35    0.99
  15   4   0    5.35    0.89
  15   4   0    3.71    1.45
 -15  -4   0    3.41    0.97
 -15  -4   0    2.61    0.92
 -15  -4   0    2.57    0.98
 -16   9   0   10.97    1.64
  16  -8   0   -0.30    0.53
  16  -8   0   -0.89    1.04
 -16   8   0    0.25    1.00
 -16   8   0    0.76    0.55
 -16   8   0   -0.96    0.98
  16  -7   0   -0.67    1.03
  16  -7   0    0.19    0.54
 -16   7   0    0.64    0.96
 -16   7   0    0.15    0.50
 -16   7   0    1.59    0.98
  16  -6   0    1.11    1.09
  16  -6   0    1.37    0.55
 -16   6   0    1.65    0.92
 -16   6   0    1.48    0.53
 -16   6   0    1.66    0.97
  16  -5   0    0.44    0.56
  16  -5   0    0.43    1.11
 -16   5   0    0.43    0.56
 -16   5   0    0.27    0.92
 -16   5   0    0.12    0.81
  16  -4   0   -0.02    0.57
  16  -4   0   -0.57    1.07
 -16   4   0   -0.48    0.85
 -16   4   0   -0.20    0.55
 -16   4   0    0.49    0.92
  16  -3   0   -0.47    0.59
  16  -3   0    0.51    1.10
 -16   3   0    0.53    0.60
 -16   3   0    0.43    0.96
 -16   3   0   -0.22    0.80
  16  -2   0   -1.42    1.14
  16  -2   0    0.59    0.64
 -16   2   0   -0.42    0.86
 -16   2   0    0.17    0.94
 -16   2   0    0.03    0.66
  16  -1   0    2.66    1.24
  16  -1   0    2.65    0.72
 -16   1   0    2.26    0.72
 -16   1   0    2.57    0.92
 -16   1   0    1.35    0.89
  16   0   0    0.99    1.18
  16   0   0    0.86    0.73
 -16   0   0    2.34    0.72
 -16   0   0    1.52    0.95
 -16   0   0    1.43    0.90
  16   1   0    1.58    0.80
  16   1   0    1.27    1.36
 -16  -1   0    2.32    0.76
 -16  -1   0    0.63    0.89
 -16  -1   0    2.43    1.02
 -16  -2   1    1.14    0.78
  16   2  -1    0.31    0.79
 -16  -1   1    0.78    0.91
 -16  -1   1    1.50    0.74
 -16  -1   1    1.49    0.90
  16   1  -1    0.10    0.75
  16   1  -1   -0.93    1.22
 -16   0   1    3.16    0.95
 -16   0   1    3.80    0.77
 -16   0   1    3.66    0.95
  16   0  -1    3.25    0.84
  16   0  -1    2.27    1.30
 -16   1   1   -0.89    0.82
 -16   1   1    2.48    1.03
 -16   1   1   -0.03    0.67
  16  -1  -1   -0.94    1.15
  16  -1  -1    0.03    0.66
 -16   2   1    0.63    0.85
 -16   2   1    0.20    0.63
 -16   2   1    1.95    0.89
  16  -2  -1   -0.58    0.66
  16  -2  -1   -0.18    1.14
 -16   3   1   -0.29    0.78
 -16   3   1    0.12    0.58
 -16   3   1    0.24    0.87
  16  -3  -1   -1.35    1.11
  16  -3  -1   -0.54    0.58
 -16   4   1    0.77    0.85
 -16   4   1   -0.02    0.55
 -16   4   1    0.47    0.82
  16  -4  -1    0.18    0.58
  16  -4  -1   -0.11    1.08
 -16   5   1   10.50    1.46
 -16   5   1    6.32    1.10
 -16   5   1    6.88    1.02
  16  -5  -1    7.90    1.12
  16  -5  -1    6.67    1.29
 -16   6   1    2.20    0.85
 -16   6   1    2.36    0.56
 -16   6   1    2.32    1.03
  16  -6  -1    2.04    0.60
  16  -6  -1    1.63    1.14
 -16   7   1    0.72    0.94
 -16   7   1    0.70    0.54
 -16   7   1    2.09    0.86
  16  -7  -1    0.98    0.54
  16  -7  -1    0.53    1.08
 -16   8   1    2.39    1.02
 -16   8   1    0.81    1.04
 -16   8   1    1.94    0.58
  16  -8  -1    1.17    1.07
  16  -8  -1    1.64    0.56
 -16   9   1   10.66    1.61
 -15  -4   1   -0.03    0.85
 -15  -4   1    0.92    0.81
 -15  -4   1   -0.25    0.82
  15   4  -1    0.24    0.71
  15   4  -1    1.18    1.21
 -15  -3   1    3.48    0.78
 -15  -3   1    2.27    0.97
 -15  -3   1    1.95    0.90
 -15  -3   1    1.98    0.79
  15   3  -1    1.90    1.30
  15   3  -1    2.26    0.80
 -15  -2   1    1.86    0.88
 -15  -2   1    0.67    0.70
 -15  -2   1    0.67    0.83
 -15  -2   1    1.51    0.66
  15   2  -1    1.78    1.26
  15   2  -1    1.56    0.75
 -15  -1   1    1.35    0.83
 -15  -1   1    2.50    0.66
 -15  -1   1    0.20    0.77
  15   1  -1    1.65    1.11
  15   1  -1    1.29    0.71
 -15   0   1    0.21    0.79
 -15   0   1    1.12    0.64
 -15   0   1    1.68    0.55
 -15   0   1   -0.51    0.79
  15   0  -1    0.59    1.08
  15   0  -1   -0.26    0.61
 -15   1   1   -0.27    0.75
 -15   1   1   -0.27    0.85
 -15   1   1    0.39    0.58
  15  -1  -1   -0.28    1.06
  15  -1  -1   -0.20    0.61
 -15   2   1    0.18    0.77
 -15   2   1    0.23    0.54
 -15   2   1    0.53    0.72
  15  -2  -1    0.00    0.54
  15  -2  -1   -1.00    0.95
 -15   3   1    4.76    0.89
 -15   3   1    2.86    0.80
 -15   3   1    1.95    0.56
  15  -3  -1    1.91    0.97
  15  -3  -1    2.23    1.03
  15  -3  -1    2.28    0.57
 -15   4   1    1.62    0.51
 -15   4   1    1.89    0.88
 -15   4   1    2.38    0.90
  15  -4  -1    1.09    0.55
  15  -4  -1    3.19    1.06
  15  -4  -1    1.73    1.02
 -15   5   1    2.46    0.52
 -15   5   1    1.85    0.88
 -15   5   1    1.93    0.77
  15  -5  -1    1.56    0.54
  15  -5  -1    0.82    1.11
  15  -5  -1    1.49    1.00
 -15   6   1   -0.75    0.45
 -15   6   1   -0.05    0.73
 -15   6   1    0.83    0.83
  15  -6  -1    0.27    0.48
 -15   7   1    0.35    0.88
 -15   7   1    0.80    0.47
 -15   7   1    1.26    0.84
  15  -7  -1    0.48    0.95
  15  -7  -1    0.88    0.51
 -15   8   1    0.82    0.76
 -15   8   1    1.23    0.92
 -15   8   1    0.99    0.48
  15  -8  -1    1.73    1.00
  15  -8  -1    0.18    0.53
 -15   9   1   -0.12    0.91
 -15   9   1   -0.33    0.48
 -15   9   1    0.25    0.89
  15  -9  -1   -0.47    0.51
  15  -9  -1    0.11    1.01
 -15  10   1    1.55    0.54
 -15  10   1    1.71    0.94
 -15  10   1    1.10    0.97
  15 -10  -1    3.14    1.16
  15 -10  -1    2.31    0.59
 -15  11   1   -0.89    0.83
 -14  -6   1    0.23    0.91
 -14  -6   1    0.13    0.89
  14   6  -1    0.56    1.33
 -14  -5   1    1.44    0.93
 -14  -5   1    2.56    0.94
 -14  -5   1    1.85    0.85
  14   5  -1    2.11    0.77
  14   5  -1    1.08    1.22
 -14  -4   1    0.24    0.71
 -14  -4   1    0.86    0.86
 -14  -4   1   -0.53    0.74
 -14  -4   1   -0.71    0.78
  14   4  -1    0.06    0.71
  14   4  -1    0.87    1.09
 -14  -3   1    3.34    0.80
 -14  -3   1    2.59    0.71
 -14  -3   1    1.16    0.78
 -14  -3   1    1.25    0.77
  14   3  -1    2.93    0.74
  14   3  -1    2.37    1.19
 -14  -2   1    0.03    0.80
 -14  -2   1    0.42    0.72
 -14  -2   1    1.90    0.67
 -14  -2   1    1.52    0.63
  14   2  -1    2.78    0.92
  14   2  -1    1.92    1.04
  14   2  -1    1.33    0.66
 -14  -1   1    2.46    0.76
 -14  -1   1    2.19    0.86
 -14  -1   1    2.96    0.65
 -14  -1   1    3.85    0.65
  14   1  -1    2.53    1.00
  14   1  -1    2.96    0.67
 -14   0   1    1.61    0.55
 -14   0   1    0.73    0.57
 -14   0   1    0.96    0.72
 -14   0   1    0.31    0.70
  14   0  -1    1.00    0.60
  14   0  -1    2.87    0.84
  14   0  -1    2.66    1.04
 -14   1   1    1.73    0.84
 -14   1   1    0.75    0.72
 -14   1   1    1.61    0.55
 -14   1   1    3.34    0.55
  14  -1  -1    0.86    0.57
  14  -1  -1    2.25    0.96
  14  -1  -1    3.42    0.84
 -14   2   1   -0.46    0.62
 -14   2   1   -0.72    0.68
 -14   2   1    1.27    0.52
 -14   2   1   -0.33    0.46
  14  -2  -1    0.36    0.51
  14  -2  -1   -0.52    0.88
  14  -2  -1    0.37    0.81
 -14   3   1    0.93    0.75
 -14   3   1    1.39    0.68
 -14   3   1    1.54    0.47
  14  -3  -1    1.23    0.88
  14  -3  -1    1.39    0.92
  14  -3  -1    1.47    0.50
 -14   4   1   -0.09    0.42
 -14   4   1   -0.86    0.63
 -14   4   1    0.28    0.72
  14  -4  -1    0.17    0.46
  14  -4  -1   -1.13    0.89
  14  -4  -1   -0.08    0.88
 -14   5   1   10.07    1.24
 -14   5   1    6.90    0.92
 -14   5   1    8.89    1.31
  14  -5  -1    6.30    0.93
  14  -5  -1    9.99    1.39
 -14   6   1    1.93    0.78
 -14   6   1    0.98    0.43
 -14   6   1    1.65    0.79
  14  -6  -1   -1.50    0.99
  14  -6  -1    2.30    0.49
  14  -6  -1    1.10    0.84
 -14   7   1    0.21    0.40
 -14   7   1   -0.99    0.71
 -14   7   1    0.00    0.76
  14  -7  -1   -0.96    0.86
  14  -7  -1   -0.14    0.46
 -14   8   1    3.22    0.77
 -14   8   1    2.33    0.47
 -14   8   1    2.96    0.88
  14  -8  -1   -0.63    1.07
  14  -8  -1    1.20    0.87
  14  -8  -1    2.12    1.00
  14  -8  -1    1.89    0.51
 -14   9   1    1.38    0.46
 -14   9   1    3.28    0.92
 -14   9   1    1.74    0.75
  14  -9  -1    1.76    0.51
  14  -9  -1    2.61    0.96
 -14  10   1    2.34    0.89
 -14  10   1    2.56    0.90
 -14  10   1    2.18    0.46
  14 -10  -1    2.60    1.06
  14 -10  -1    0.95    0.93
  14 -10  -1    2.17    0.51
 -14  11   1    0.53    0.40
 -14  11   1   -0.02    0.84
 -14  11   1   -0.26    0.83
  14 -11  -1    0.43    0.46
  14 -11  -1    1.28    1.09
 -14  12   1   -0.84    0.92
 -14  12   1    1.16    0.88
 -14  12   1   -0.06    0.40
  14 -12  -1    1.05    1.20
  14 -12  -1    0.11    0.49
  14 -12  -1   -1.36    1.04
 -13  -7   1    2.76    0.94
 -13  -7   1    1.95    1.02
  13   7  -1    0.92    1.22
 -13  -6   1    0.81    0.84
 -13  -6   1    1.28    0.87
 -13  -6   1    2.88    0.90
  13   6  -1    4.68    1.21
  13   6  -1    1.94    0.81
  13   6  -1    3.33    1.19
 -13  -5   1    0.78    0.73
 -13  -5   1    1.42    0.78
 -13  -5   1    1.31    0.76
  13   5  -1    0.10    1.08
  13   5  -1    2.21    1.00
  13   5  -1    1.06    0.74
 -13  -4   1    2.73    0.74
 -13  -4   1    1.71    0.73
 -13  -4   1    1.55    0.72
 -13  -4   1    1.28    0.63
  13   4  -1    3.42    1.03
  13   4  -1    2.39    0.70
 -13  -3   1    0.53    0.74
 -13  -3   1   -0.18    0.66
 -13  -3   1    0.32    0.59
 -13  -3   1    0.85    0.62
  13   3  -1    1.32    0.96
  13   3  -1    1.40    0.62
  13   3  -1    3.01    0.93
 -13  -2   1    3.93    0.67
 -13  -2   1    4.10    0.86
 -13  -2   1    3.28    0.75
  13   2  -1    5.54    1.08
  13   2  -1    5.66    0.73
 -13  -1   1    1.84    0.56
 -13  -1   1    1.27    0.56
 -13  -1   1    0.52    0.65
 -13  -1   1    0.98    0.75
  13   1  -1    1.62    0.87
  13   1  -1    2.40    0.75
  13   1  -1    0.93    0.55
 -13   0   1    6.63    0.93
 -13   0   1    6.33    0.86
 -13   0   1    4.69    0.89
 -13   0   1    4.67    0.84
  13   0  -1    6.22    1.04
  13   0  -1    7.64    0.99
 -13   1   1    1.78    0.67
 -13   1   1    2.30    0.50
 -13   1   1    1.44    0.70
  13  -1  -1    3.90    0.56
  13  -1  -1    2.50    0.73
  13  -1  -1    2.95    0.87
 -13   2   1    2.11    0.65
 -13   2   1    1.47    0.71
  13  -2  -1    4.06    0.88
  13  -2  -1    2.69    0.77
 -13   3   1    3.72    0.75
 -13   3   1    3.65    0.52
 -13   3   1    3.26    0.80
  13  -3  -1    4.31    0.94
  13  -3  -1    4.34    0.56
  13  -3  -1    3.12    0.85
 -13   4   1    2.27    0.69
 -13   4   1    2.36    0.46
 -13   4   1    2.74    0.72
  13  -4  -1    2.07    0.81
  13  -4  -1    2.45    0.56
  13  -4  -1    2.55    0.48
 -13   5   1    0.28    0.37
 -13   5   1    1.63    0.61
 -13   5   1    0.16    0.64
  13  -5  -1   -0.71    0.56
  13  -5  -1    0.99    0.43
  13  -5  -1   -1.60    0.81
  13  -5  -1   -0.15    0.73
 -13   6   1   -0.10    0.58
 -13   6   1   -0.16    0.36
 -13   6   1    0.17    0.67
  13  -6  -1   -0.41    0.38
  13  -6  -1    0.01    0.79
 -13   7   1    7.24    0.76
 -13   7   1    6.21    1.06
 -13   7   1    8.27    1.11
  13  -7  -1    3.78    1.06
  13  -7  -1    6.62    0.82
  13  -7  -1    5.38    0.85
  13  -7  -1    6.24    0.99
 -13   8   1   -0.13    0.35
 -13   8   1    0.26    0.72
 -13   8   1   -0.26    0.62
  13  -8  -1    0.31    0.86
  13  -8  -1    0.92    0.40
  13  -8  -1   -2.47    1.23
 -13   9   1    1.73    0.38
 -13   9   1    2.23    0.79
 -13   9   1    1.33    0.76
  13  -9  -1    2.08    0.90
  13  -9  -1   -1.08    1.04
  13  -9  -1    1.03    0.42
  13  -9  -1    0.60    0.80
 -13  10   1    1.00    0.83
 -13  10   1    2.05    0.78
 -13  10   1    1.17    0.37
  13 -10  -1    1.06    0.43
  13 -10  -1    2.11    1.02
  13 -10  -1    0.22    0.83
 -13  11   1    6.17    0.73
 -13  11   1    5.94    0.94
 -13  11   1    5.43    1.01
  13 -11  -1    6.23    0.80
  13 -11  -1    3.87    0.99
 -13  12   1    0.63    0.84
 -13  12   1    0.36    0.39
 -13  12   1    0.13    0.85
  13 -12  -1   -0.55    0.42
  13 -12  -1   -1.88    0.88
 -13  13   1   -0.01    0.46
 -13  13   1   -0.51    0.83
 -13  13   1   -1.14    0.78
  13 -13  -1   -0.81    0.47
  13 -13  -1   -1.33    0.99
 -12  -9   1    3.85    1.23
  12   9  -1    4.79    1.47
 -12  -8   1    0.83    0.79
 -12  -8   1    0.19    1.00
  12   8  -1    1.14    1.18
 -12  -7   1    1.50    0.89
 -12  -7   1    1.10    0.77
  12   7  -1    2.05    1.13
  12   7  -1    2.55    1.13
 -12  -6   1   -0.09    0.76
 -12  -6   1   -0.45    0.69
 -12  -6   1    0.27    0.77
  12   6  -1    1.05    0.88
  12   6  -1    0.15    1.02
  12   6  -1    0.18    0.65
 -12  -5   1    0.33    0.66
 -12  -5   1    0.07    0.70
 -12  -5   1   -0.79    0.66
 -12  -5   1    1.07    0.71
  12   5  -1    1.24    0.85
  12   5  -1   -1.48    0.92
  12   5  -1   -0.62    0.58
 -12  -4   1    2.35    0.67
 -12  -4   1    4.23    0.77
 -12  -4   1    3.40    0.72
 -12  -4   1    3.97    0.80
  12   4  -1    4.90    1.05
  12   4  -1    3.72    0.70
  12   4  -1    6.94    1.29
 -12  -3   1    0.32    0.58
 -12  -3   1    0.16    0.99
 -12  -3   1    0.12    0.57
 -12  -3   1    0.10    0.68
  12   3  -1    1.06    0.56
  12   3  -1    0.55    0.86
  12   3  -1    1.53    0.74
 -12  -2   1    4.53    0.79
 -12  -2   1    6.36    0.87
 -12  -2   1    5.49    0.78
 -12  -2   1    4.29    0.67
  12   2  -1    6.58    1.04
  12   2  -1    6.23    0.74
 -12  -1   1   -0.10    0.57
 -12  -1   1    0.43    0.51
 -12  -1   1   -0.39    0.55
 -12  -1   1    0.29    0.39
 -12  -1   1   -0.07    0.46
  12   1  -1    0.39    0.81
  12   1  -1   -0.67    0.48
  12   1  -1    0.77    0.63
 -12   0   1    8.53    1.04
 -12   0   1   11.12    1.20
 -12   0   1    7.57    1.13
  12   0  -1    9.73    1.23
  12   0  -1   12.40    1.36
  12   0  -1    8.29    1.22
  12   0  -1   12.33    1.08
 -12   1   1    0.75    0.43
 -12   1   1    0.73    0.57
 -12   1   1    0.20    0.59
 -12   1   1    1.19    0.42
  12  -1  -1    0.00    0.50
  12  -1  -1    0.70    0.67
  12  -1  -1    0.32    0.73
  12  -1  -1    1.82    0.40
  12  -1  -1    1.14    0.44
 -12   2   1   22.34    1.72
 -12   2   1   24.30    1.68
 -12   2   1   21.04    1.84
 -12   2   1   20.04    1.68
 -12   2   1   22.23    1.80
  12  -2  -1   22.49    1.97
  12  -2  -1   22.34    1.94
  12  -2  -1   22.96    1.84
  12  -2  -1   22.19    1.71
 -12   3   1    0.67    0.35
 -12   3   1    0.14    0.36
 -12   3   1   -0.24    0.60
 -12   3   1    0.30    0.37
 -12   3   1    0.04    0.57
  12  -3  -1   -0.30    0.70
  12  -3  -1    0.02    0.72
  12  -3  -1    0.22    0.39
  12  -3  -1    0.55    0.44
  12  -3  -1   -0.17    0.47
 -12   4   1    9.59    1.17
 -12   4   1    8.70    0.89
 -12   4   1    9.54    0.79
 -12   4   1    8.86    1.14
 -12   4   1    8.99    0.92
  12  -4  -1    7.01    1.07
  12  -4  -1    8.58    1.24
  12  -4  -1    6.35    1.05
  12  -4  -1   11.87    0.93
  12  -4  -1   11.77    1.07
 -12   5   1    9.02    1.12
 -12   5   1    9.36    1.10
 -12   5   1    7.88    0.83
 -12   5   1    7.73    0.69
 -12   5   1    7.99    0.87
  12  -5  -1    9.30    0.86
  12  -5  -1    5.86    0.81
  12  -5  -1    7.67    0.97
  12  -5  -1    8.28    1.20
 -12   6   1    3.38    0.67
 -12   6   1    2.00    0.62
 -12   6   1    2.56    0.41
 -12   6   1    2.54    0.33
  12  -6  -1    1.93    0.46
  12  -6  -1    2.50    0.45
  12  -6  -1    0.35    0.80
  12  -6  -1    1.91    0.61
  12  -6  -1    3.38    0.82
 -12   7   1   11.33    1.30
 -12   7   1   12.68    1.25
 -12   7   1   11.90    0.94
  12  -7  -1    9.48    1.29
  12  -7  -1   12.21    1.41
  12  -7  -1   10.35    0.99
  12  -7  -1    8.22    1.55
 -12   8   1    1.68    0.35
 -12   8   1    1.01    0.62
 -12   8   1    2.02    0.65
  12  -8  -1    1.54    0.85
  12  -8  -1    1.03    0.88
  12  -8  -1    0.82    0.67
  12  -8  -1    1.84    0.38
 -12   9   1    2.86    0.39
 -12   9   1    2.19    0.74
 -12   9   1    2.67    0.77
  12  -9  -1    3.14    0.77
  12  -9  -1    3.45    0.44
  12  -9  -1    1.71    0.99
 -12  10   1   -0.30    0.32
 -12  10   1   -0.15    0.67
 -12  10   1   -0.55    0.68
  12 -10  -1   -1.61    0.98
  12 -10  -1   -0.43    0.35
  12 -10  -1   -0.62    0.71
 -12  11   1    9.21    1.36
 -12  11   1    9.89    0.95
 -12  11   1   11.51    1.26
  12 -11  -1   10.65    0.96
  12 -11  -1    9.43    1.44
 -12  12   1    0.76    0.81
 -12  12   1    1.15    0.78
 -12  12   1    0.22    0.42
 -12  12   1   -0.17    0.85
  12 -12  -1    0.38    0.43
  12 -12  -1    0.16    0.78
 -12  13   1    0.53    0.85
 -12  13   1    1.18    0.75
 -12  13   1    1.64    0.93
 -12  13   1    1.22    0.45
  12 -13  -1    1.13    0.47
  12 -13  -1    0.23    0.92
 -12  14   1    1.17    0.85
 -12  14   1    0.35    1.02
 -12  14   1    1.49    0.51
  12 -14  -1    0.68    0.96
  12 -14  -1    1.02    0.53
 -11 -10   1    0.21    1.13
  11  10  -1    0.55    1.32
 -11  -9   1    5.43    0.99
 -11  -9   1    6.57    1.21
  11   9  -1    7.33    1.35
 -11  -8   1    2.26    0.76
 -11  -8   1    1.03    0.90
  11   8  -1    0.60    1.13
  11   8  -1    2.12    1.13
 -11  -7   1    1.48    0.93
 -11  -7   1    2.26    0.71
 -11  -7   1    1.71    0.86
  11   7  -1    1.46    0.90
  11   7  -1    3.31    0.59
  11   7  -1    1.44    1.03
  11   7  -1    2.47    0.64
 -11  -6   1    2.69    0.72
 -11  -6   1    2.79    0.73
 -11  -6   1    2.86    0.84
  11   6  -1    4.28    0.87
  11   6  -1    2.93    0.88
  11   6  -1    3.09    1.02
  11   6  -1    3.47    0.66
 -11  -5   1   -0.31    0.51
 -11  -5   1   -0.37    0.62
 -11  -5   1   -0.58    0.59
 -11  -5   1   -1.23    0.56
 -11  -5   1    0.11    0.56
  11   5  -1    1.20    0.74
  11   5  -1    0.07    0.52
  11   5  -1    0.36    0.48
  11   5  -1    0.04    0.88
 -11  -4   1   -0.19    0.59
 -11  -4   1   -0.01    0.50
 -11  -4   1   -0.02    0.54
 -11  -4   1   -0.46    0.55
 -11  -4   1    0.09    0.52
  11   4  -1    0.14    0.66
  11   4  -1    0.68    0.81
  11   4  -1   -0.27    0.52
  11   4  -1    1.48    0.70
  11   4  -1    0.19    0.42
 -11  -3   1    1.92    0.59
 -11  -3   1    0.90    0.68
 -11  -3   1    0.48    0.44
 -11  -3   1    1.09    0.72
 -11  -3   1    1.84    0.68
  11   3  -1    1.48    0.72
  11   3  -1    1.03    0.83
  11   3  -1    0.95    0.62
  11   3  -1    1.61    0.68
  11   3  -1    1.47    0.41
 -11  -2   1    1.53    0.48
 -11  -2   1    1.60    0.66
 -11  -2   1    2.07    0.54
  11   2  -1    1.46    0.57
  11   2  -1    1.69    0.65
  11   2  -1    2.42    1.02
  11   2  -1    1.81    0.77
  11   2  -1    1.62    0.39
 -11  -1   1    3.64    0.59
 -11  -1   1    3.33    0.71
 -11  -1   1    3.11    0.54
 -11  -1   1    3.25    0.58
  11   1  -1    5.88    0.96
  11   1  -1    4.24    0.81
  11   1  -1    2.44    0.60
  11   1  -1    3.71    0.72
  11   1  -1    4.83    0.62
 -11   0   1   19.78    1.66
 -11   0   1   19.09    1.67
 -11   0   1   24.09    1.59
 -11   0   1   18.56    1.58
  11   0  -1   16.72    1.68
  11   0  -1   19.13    1.70
  11   0  -1   23.56    1.61
  11   0  -1   20.54    1.79
  11   0  -1   20.57    1.53
 -11   1   1    3.32    0.46
 -11   1   1    3.68    0.64
 -11   1   1    3.73    0.51
 -11   1   1    3.09    0.63
  11  -1  -1    2.83    0.73
  11  -1  -1    2.80    0.68
  11  -1  -1    4.95    0.66
  11  -1  -1    2.60    0.54
  11  -1  -1    3.16    0.76
  11  -1  -1    3.01    0.49
 -11   2   1    5.31    0.72
 -11   2   1    5.11    0.64
 -11   2   1    3.90    0.74
 -11   2   1    5.30    0.69
 -11   2   1    5.14    0.70
  11  -2  -1    5.51    0.70
  11  -2  -1    4.33    0.78
  11  -2  -1    3.30    0.57
  11  -2  -1    3.56    0.79
  11  -2  -1    3.81    0.77
 -11   3   1   11.09    0.91
 -11   3   1   10.90    1.13
 -11   3   1   10.69    1.07
 -11   3   1   10.54    0.94
 -11   3   1   10.72    0.97
  11  -3  -1    9.44    1.03
  11  -3  -1   10.49    1.24
  11  -3  -1   10.65    1.90
  11  -3  -1    8.29    1.32
  11  -3  -1   11.21    1.09
 -11   4   1    2.56    0.60
 -11   4   1    2.62    0.39
 -11   4   1    2.87    0.37
 -11   4   1    2.25    0.59
 -11   4   1    2.56    0.39
  11  -4  -1    2.10    0.45
  11  -4  -1    2.69    0.73
  11  -4  -1    1.42    0.50
  11  -4  -1    2.30    0.71
 -11   5   1    3.52    0.44
 -11   5   1    2.39    0.39
 -11   5   1    3.24    0.41
 -11   5   1    3.57    0.70
 -11   5   1    2.36    0.58
  11  -5  -1    2.51    0.46
  11  -5  -1    3.15    0.56
  11  -5  -1    3.30    0.44
  11  -5  -1    2.26    0.74
  11  -5  -1    3.61    0.77
 -11   6   1   10.17    1.01
 -11   6   1    8.61    0.84
 -11   6   1    9.64    1.15
 -11   6   1    9.13    0.96
 -11   6   1   10.84    0.79
  11  -6  -1   10.01    1.34
  11  -6  -1   10.36    1.25
  11  -6  -1    9.03    0.95
  11  -6  -1    9.06    0.87
  11  -6  -1    9.22    1.13
 -11   7   1    1.48    0.63
 -11   7   1    0.93    0.54
 -11   7   1    0.59    0.26
 -11   7   1    0.67    0.29
 -11   7   1    1.08    0.26
  11  -7  -1    0.71    0.36
  11  -7  -1    0.81    0.57
  11  -7  -1    0.77    0.34
  11  -7  -1    1.60    0.78
  11  -7  -1    0.61    0.74
 -11   8   1   12.02    1.15
 -11   8   1    9.20    0.83
 -11   8   1   10.46    1.20
 -11   8   1    9.58    0.84
  11  -8  -1    9.50    0.86
  11  -8  -1   11.07    1.21
  11  -8  -1    8.30    1.46
 -11   9   1    2.53    0.68
 -11   9   1    3.48    0.72
 -11   9   1    2.27    0.38
 -11   9   1    2.30    0.35
  11  -9  -1    2.29    0.65
  11  -9  -1    2.24    0.40
  11  -9  -1    1.77    0.86
 -11  10   1    2.99    0.74
 -11  10   1    4.37    0.75
 -11  10   1    3.18    0.85
 -11  10   1    4.50    0.64
 -11  10   1    3.83    0.43
  11 -10  -1    3.97    0.77
  11 -10  -1    3.98    1.02
  11 -10  -1    4.12    0.48
 -11  11   1    2.18    0.72
 -11  11   1    3.04    0.83
 -11  11   1    2.42    0.42
 -11  11   1    2.29    0.70
  11 -11  -1    2.79    0.74
  11 -11  -1    2.60    0.45
 -11  12   1   -0.49    0.67
 -11  12   1   -0.28    0.63
 -11  12   1   -0.12    0.39
 -11  12   1   -0.16    0.82
  11 -12  -1   -0.40    0.75
  11 -12  -1   -0.69    0.41
 -11  13   1    1.79    0.83
 -11  13   1    2.12    0.70
 -11  13   1    2.59    0.94
 -11  13   1    1.96    0.47
  11 -13  -1    2.66    0.51
  11 -13  -1    2.82    0.88
 -11  14   1    0.09    0.46
 -11  14   1   -0.06    0.93
 -11  14   1    0.07    0.82
  11 -14  -1   -0.05    0.48
  11 -14  -1    1.39    0.92
 -10 -11   1    0.59    1.11
  10  11  -1   -0.02    1.16
 -10 -10   1    0.44    1.04
  10  10  -1    0.35    1.08
  10  10  -1    1.38    0.89
 -10  -9   1    2.67    0.98
 -10  -9   1    0.39    0.71
  10   9  -1    0.99    0.70
  10   9  -1    1.13    1.00
 -10  -8   1    1.18    0.84
 -10  -8   1    1.19    0.67
  10   8  -1    2.29    0.92
  10   8  -1    2.05    1.01
  10   8  -1    1.58    0.69
  10   8  -1    0.79    0.99
 -10  -7   1    9.74    1.29
 -10  -7   1   10.92    1.35
 -10  -7   1    8.47    1.17
  10   7  -1    9.09    1.38
  10   7  -1    8.10    1.24
  10   7  -1   11.25    1.04
  10   7  -1    8.14    1.16
  10   7  -1    9.86    1.24
  10   7  -1    9.52    1.14
 -10  -6   1    0.88    0.58
 -10  -6   1    0.31    0.71
 -10  -6   1    1.11    0.61
  10   6  -1    1.09    0.49
  10   6  -1    0.49    0.88
  10   6  -1    0.81    0.64
  10   6  -1    0.91    0.71
  10   6  -1    0.80    0.54
 -10  -5   1    0.39    0.51
 -10  -5   1    1.47    0.55
 -10  -5   1    1.39    0.61
 -10  -5   1    1.87    0.61
 -10  -5   1    1.30    0.64
  10   5  -1    1.86    0.58
  10   5  -1    2.16    0.69
  10   5  -1    1.24    0.51
  10   5  -1    1.26    0.46
  10   5  -1    1.72    0.86
 -10  -4   1   -0.37    0.46
 -10  -4   1   -0.55    0.46
 -10  -4   1   -0.73    0.63
 -10  -4   1   -0.35    0.43
 -10  -4   1   -1.03    0.56
  10   4  -1    0.28    0.65
  10   4  -1    0.36    0.80
  10   4  -1    0.29    0.54
  10   4  -1   -0.05    0.40
  10   4  -1   -0.22    0.46
  10   4  -1    0.02    0.58
 -10  -3   1    4.07    0.65
 -10  -3   1    2.93    0.60
 -10  -3   1    4.39    0.58
 -10  -3   1    3.28    0.65
 -10  -3   1    4.09    0.59
  10   3  -1    2.79    0.62
  10   3  -1    4.64    0.88
  10   3  -1    3.86    0.58
  10   3  -1    4.73    0.64
  10   3  -1    4.20    0.72
 -10  -2   1   -0.49    0.37
 -10  -2   1   -0.22    0.44
 -10  -2   1   -0.47    0.55
 -10  -2   1   -0.48    0.42
 -10  -2   1    0.04    0.45
  10   2  -1    0.31    0.67
  10   2  -1   -0.34    0.41
  10   2  -1    0.28    0.33
  10   2  -1   -0.64    0.43
  10   2  -1    0.30    0.56
 -10  -1   1   -0.40    0.46
 -10  -1   1   -0.25    0.38
 -10  -1   1   -0.08    0.39
 -10  -1   1   -0.31    0.38
  10   1  -1   -0.07    0.65
  10   1  -1    0.15    0.31
  10   1  -1   -0.04    0.38
  10   1  -1   -0.35    0.42
  10   1  -1    0.07    0.54
 -10   0   1   41.32    2.96
 -10   0   1   41.60    3.02
 -10   0   1   42.76    2.97
 -10   0   1   35.25    3.00
  10   0  -1   41.00    3.02
  10   0  -1   42.83    3.08
  10   0  -1   45.21    2.94
  10   0  -1   45.17    2.97
 -10   1   1   29.91    2.18
 -10   1   1   29.30    2.17
 -10   1   1   28.23    2.08
 -10   1   1   25.59    2.08
  10  -1  -1   29.99    2.26
  10  -1  -1   26.46    2.09
  10  -1  -1   30.38    2.27
  10  -1  -1   31.24    2.09
  10  -1  -1   28.88    2.16
 -10   2   1    0.95    0.33
 -10   2   1    0.70    0.55
 -10   2   1    0.69    0.34
 -10   2   1    0.33    0.35
 -10   2   1    1.29    0.47
  10  -2  -1    1.54    0.36
  10  -2  -1   -0.08    0.36
  10  -2  -1    1.49    0.53
  10  -2  -1   -0.04    0.60
  10  -2  -1    0.55    0.37
  10  -2  -1    1.25    0.61
 -10   3   1   29.60    2.06
 -10   3   1   27.71    2.04
 -10   3   1   29.00    2.09
 -10   3   1   29.17    2.17
 -10   3   1   30.91    2.19
  10  -3  -1   26.51    2.10
  10  -3  -1   28.27    2.33
  10  -3  -1   27.53    2.21
  10  -3  -1   30.35    2.12
  10  -3  -1   26.78    2.25
  10  -3  -1   30.11    2.08
 -10   4   1    3.77    0.49
 -10   4   1    3.86    0.62
 -10   4   1    4.26    0.67
  10  -4  -1    4.24    0.85
  10  -4  -1    3.34    0.46
  10  -4  -1    3.65    0.55
  10  -4  -1    5.48    1.10
  10  -4  -1    3.95    0.74
 -10   5   1   42.19    2.86
 -10   5   1   39.38    2.97
 -10   5   1   36.70    2.77
 -10   5   1   39.24    2.73
 -10   5   1   40.18    2.77
  10  -5  -1   41.63    2.79
  10  -5  -1   43.45    2.99
  10  -5  -1   37.15    2.78
  10  -5  -1   37.82    3.03
  10  -5  -1   41.63    2.84
  10  -5  -1   30.89    3.30
 -10   6   1    2.41    0.60
 -10   6   1    2.14    0.30
 -10   6   1    2.13    0.32
 -10   6   1    2.50    0.31
 -10   6   1    2.03    0.53
 -10   6   1    1.36    0.35
  10  -6  -1    2.33    0.52
  10  -6  -1    2.31    0.71
  10  -6  -1    1.81    0.69
  10  -6  -1    1.52    0.36
  10  -6  -1    1.55    0.67
  10  -6  -1    1.72    0.34
 -10   7   1   -0.39    0.27
 -10   7   1    0.05    0.25
 -10   7   1   -0.12    0.22
 -10   7   1   -0.34    0.45
 -10   7   1    0.03    0.52
  10  -7  -1    0.17    0.29
  10  -7  -1   -0.28    0.28
  10  -7  -1    1.01    0.44
  10  -7  -1   -0.33    0.62
  10  -7  -1   -0.28    0.51
 -10   8   1    0.93    0.65
 -10   8   1    1.08    0.26
 -10   8   1    1.28    0.66
 -10   8   1    1.63    0.58
 -10   8   1    1.14    0.31
  10  -8  -1    0.87    0.73
  10  -8  -1    0.80    0.53
  10  -8  -1    0.85    0.32
 -10   9   1    0.31    0.55
 -10   9   1   -0.02    0.93
 -10   9   1    0.28    0.63
 -10   9   1    0.21    0.26
 -10   9   1    0.28    0.31
  10  -9  -1   -0.25    0.70
  10  -9  -1    0.30    0.34
  10  -9  -1    0.86    0.41
  10  -9  -1    0.07    0.70
 -10  10   1    0.86    0.30
 -10  10   1   -0.02    0.73
 -10  10   1    0.39    0.63
 -10  10   1    0.84    0.34
  10 -10  -1    0.76    0.60
  10 -10  -1    1.00    0.81
  10 -10  -1    1.29    0.48
  10 -10  -1    1.41    0.38
 -10  11   1    0.23    0.33
 -10  11   1   -0.32    0.29
 -10  11   1    0.06    0.59
 -10  11   1   -0.35    0.69
 -10  11   1    0.78    0.86
  10 -11  -1    0.32    0.50
  10 -11  -1    0.03    0.90
  10 -11  -1   -0.28    0.36
  10 -11  -1    0.32    0.64
 -10  12   1    1.11    0.78
 -10  12   1    0.43    0.35
 -10  12   1    0.16    0.64
 -10  12   1   -0.94    0.77
  10 -12  -1    0.07    0.35
  10 -12  -1    0.54    0.60
  10 -12  -1    0.79    0.72
 -10  13   1    0.60    1.10
 -10  13   1   -0.20    0.36
 -10  13   1    0.78    0.69
 -10  13   1   -1.04    0.88
  10 -13  -1    0.43    0.77
  10 -13  -1   -0.45    0.39
 -10  14   1    1.33    1.01
 -10  14   1    0.56    0.77
 -10  14   1    0.76    0.41
  10 -14  -1    2.06    0.85
  10 -14  -1    0.83    0.45
 -10  15   1   -1.49    0.72
 -10  15   1    1.12    1.07
 -10  15   1    0.61    0.45
  10 -15  -1    0.34    0.49
  10 -15  -1   -0.22    0.88
  -9 -12   1   -0.82    1.08
   9  12  -1   -0.26    0.97
   9  12  -1    1.41    1.22
  -9 -11   1    0.16    0.92
   9  11  -1    2.29    0.91
   9  11  -1    2.18    0.82
   9  11  -1    0.87    1.14
  -9 -10   1    1.72    0.93
  -9 -10   1    0.01    0.68
   9  10  -1    0.73    0.80
   9  10  -1    1.46    0.71
   9  10  -1    0.36    0.98
  -9  -9   1   -0.01    0.62
  -9  -9   1    1.57    0.85
   9   9  -1    0.45    0.89
   9   9  -1    0.35    0.61
   9   9  -1    1.38    0.93
  -9  -8   1    3.46    0.69
  -9  -8   1    4.96    0.90
  -9  -8   1    4.17    0.81
   9   8  -1    4.20    0.94
   9   8  -1    3.64    0.88
   9   8  -1    4.07    1.04
   9   8  -1    3.63    0.73
   9   8  -1    4.14    0.70
  -9  -7   1    1.41    0.71
  -9  -7   1    0.76    0.61
  -9  -7   1    1.22    0.68
   9   7  -1    1.36    0.44
   9   7  -1    0.64    0.50
   9   7  -1    0.33    0.67
   9   7  -1    1.03    0.71
   9   7  -1    1.30    0.51
   9   7  -1    1.07    0.57
   9   7  -1    0.23    0.86
  -9  -6   1    0.67    0.55
  -9  -6   1    0.94    0.54
  -9  -6   1    1.28    0.67
  -9  -6   1    1.10    0.62
  -9  -6   1    1.02    0.64
   9   6  -1    1.42    0.56
   9   6  -1    0.19    0.60
   9   6  -1    1.11    0.49
   9   6  -1    0.76    0.84
   9   6  -1    1.04    0.47
   9   6  -1    1.02    0.64
  -9  -5   1   14.39    1.54
  -9  -5   1   12.62    1.22
  -9  -5   1   12.73    1.23
  -9  -5   1   11.92    1.30
  -9  -5   1   13.33    1.15
   9   5  -1   13.09    1.19
   9   5  -1   12.86    1.21
   9   5  -1   13.26    1.17
   9   5  -1   12.99    1.40
   9   5  -1   12.98    1.50
  -9  -4   1    4.87    0.66
  -9  -4   1    5.63    0.84
  -9  -4   1    4.56    0.61
  -9  -4   1    6.32    1.17
  -9  -4   1    5.77    0.75
  -9  -4   1    5.59    0.86
   9   4  -1    4.84    0.60
   9   4  -1    3.74    0.66
   9   4  -1    6.81    1.07
   9   4  -1    6.46    0.92
   9   4  -1    4.34    0.62
   9   4  -1    5.54    0.74
  -9  -3   1   -0.33    0.50
  -9  -3   1   -0.79    0.51
  -9  -3   1   -0.06    0.41
  -9  -3   1    0.04    0.38
  -9  -3   1   -0.63    0.41
  -9  -3   1    0.20    0.47
   9   3  -1    0.19    0.34
   9   3  -1   -0.09    0.39
   9   3  -1   -0.41    0.54
   9   3  -1   -0.30    0.42
  -9  -2   1    6.85    0.80
  -9  -2   1    6.92    0.82
  -9  -2   1    6.59    0.89
  -9  -2   1    5.30    0.82
  -9  -2   1    7.73    1.19
  -9  -2   1    7.43    0.88
   9   2  -1    7.12    0.91
   9   2  -1    6.61    1.07
   9   2  -1    6.01    0.96
   9   2  -1    7.46    0.72
   9   2  -1    7.07    0.80
  -9  -1   1    2.55    0.43
  -9  -1   1    2.91    0.46
  -9  -1   1    2.19    0.53
  -9  -1   1    2.80    0.48
  -9  -1   1    3.09    0.43
   9   1  -1    2.73    0.59
   9   1  -1    2.99    0.61
   9   1  -1    2.11    0.45
   9   1  -1    2.58    0.43
   9   1  -1    3.20    0.41
  -9   0   1    3.80    0.48
  -9   0   1    3.92    0.44
  -9   0   1    3.84    0.60
  -9   0   1    4.19    0.67
  -9   0   1    2.25    0.52
   9   0  -1    2.70    0.47
   9   0  -1    3.84    0.45
   9   0  -1    3.45    0.61
   9   0  -1    4.15    0.67
   9   0  -1    3.98    0.47
  -9   1   1   37.15    2.64
  -9   1   1   37.09    2.68
  -9   1   1   36.43    2.70
  -9   1   1   38.26    2.63
   9  -1  -1   37.51    2.76
   9  -1  -1   37.32    2.75
   9  -1  -1   39.13    2.64
   9  -1  -1   36.70    2.64
   9  -1  -1   37.33    2.68
  -9   2   1    9.07    0.77
  -9   2   1    8.98    0.93
  -9   2   1    8.46    0.82
  -9   2   1    8.36    0.84
  -9   2   1    9.03    0.76
   9  -2  -1    7.90    0.84
   9  -2  -1    9.23    1.16
   9  -2  -1    7.77    0.99
   9  -2  -1    8.58    0.86
   9  -2  -1    7.40    1.07
   9  -2  -1    8.98    0.79
  -9   3   1    8.81    0.80
  -9   3   1    8.77    0.92
  -9   3   1    8.11    0.86
  -9   3   1    8.40    0.73
  -9   3   1    8.15    0.74
   9  -3  -1    9.82    1.17
   9  -3  -1    7.80    0.92
   9  -3  -1    7.53    0.87
   9  -3  -1    9.13    0.76
   9  -3  -1    8.64    0.82
   9  -3  -1    7.67    1.06
  -9   4   1   36.45    2.65
  -9   4   1   38.63    2.66
  -9   4   1   37.25    2.53
  -9   4   1   33.37    2.54
  -9   4   1   35.03    2.57
   9  -4  -1   36.34    2.70
   9  -4  -1   37.01    2.58
   9  -4  -1   34.09    2.77
   9  -4  -1   35.21    2.55
   9  -4  -1   38.37    2.62
   9  -4  -1   40.21    2.74
  -9   5   1    0.53    0.44
  -9   5   1   -0.28    0.47
  -9   5   1   -0.03    0.25
  -9   5   1   -0.49    0.22
  -9   5   1   -0.19    0.27
   9  -5  -1   -0.04    0.27
   9  -5  -1    0.16    0.26
   9  -5  -1   -0.10    0.54
   9  -5  -1   -0.43    0.45
   9  -5  -1    0.60    0.41
  -9   6   1   -0.22    0.25
  -9   6   1    0.07    0.46
  -9   6   1    0.26    0.41
  -9   6   1   -0.09    0.20
  -9   6   1   -0.24    0.26
  -9   6   1   -0.10    0.26
   9  -6  -1    0.02    0.45
   9  -6  -1   -0.34    0.27
   9  -6  -1   -0.39    0.55
   9  -6  -1    0.01    0.26
   9  -6  -1   -0.23    0.52
  -9   7   1    5.37    0.52
  -9   7   1    3.91    0.64
  -9   7   1    2.98    0.47
  -9   7   1    5.94    0.78
   9  -7  -1    5.45    1.05
   9  -7  -1    3.77    0.42
   9  -7  -1    5.20    0.86
   9  -7  -1    4.97    0.56
   9  -7  -1    3.72    0.72
  -9   8   1   -0.12    0.49
  -9   8   1   -0.26    0.22
  -9   8   1   -0.19    0.27
  -9   8   1   -0.19    0.57
   9  -8  -1   -0.41    0.29
   9  -8  -1    0.09    0.62
   9  -8  -1   -0.08    0.63
   9  -8  -1    0.54    0.49
  -9   9   1    0.25    0.61
  -9   9   1   -0.15    0.52
  -9   9   1    0.22    0.26
  -9   9   1    0.37    0.24
  -9   9   1   -0.47    0.54
  -9   9   1   -0.16    0.49
   9  -9  -1    0.36    0.68
   9  -9  -1   -0.27    0.59
   9  -9  -1    0.03    0.39
   9  -9  -1    0.28    0.30
  -9  10   1   -0.10    0.27
  -9  10   1   -0.68    0.49
  -9  10   1   -0.56    0.52
  -9  10   1   -0.20    0.64
  -9  10   1   -0.54    0.61
  -9  10   1   -0.08    0.25
   9 -10  -1   -0.53    0.75
   9 -10  -1   -0.20    0.30
   9 -10  -1    0.31    0.44
   9 -10  -1   -0.46    0.57
  -9  11   1    3.11    0.84
  -9  11   1    2.68    0.67
  -9  11   1    2.63    0.37
  -9  11   1    3.31    0.60
  -9  11   1    2.20    0.35
  -9  11   1    1.59    0.80
   9 -11  -1    3.00    0.92
   9 -11  -1    3.14    0.57
   9 -11  -1    3.18    0.42
   9 -11  -1    2.68    0.69
  -9  12   1    1.37    0.55
  -9  12   1    1.05    0.79
  -9  12   1    0.96    0.62
  -9  12   1    0.98    0.34
  -9  12   1    1.12    0.32
   9 -12  -1    1.14    0.68
   9 -12  -1    0.98    0.58
   9 -12  -1    0.69    0.37
  -9  13   1    0.81    0.63
  -9  13   1    0.76    0.35
  -9  13   1   -0.91    0.52
  -9  13   1    0.20    0.82
   9 -13  -1    0.05    0.72
   9 -13  -1    0.27    0.86
   9 -13  -1    0.32    0.37
  -9  14   1    4.59    1.03
  -9  14   1    3.52    0.49
  -9  14   1    4.58    0.81
   9 -14  -1    3.51    0.53
   9 -14  -1    4.46    0.95
   9 -14  -1    2.58    0.82
  -9  15   1   -0.09    0.43
  -9  15   1   -0.74    0.69
  -9  15   1   -0.15    0.99
   9 -15  -1   -2.73    1.26
   9 -15  -1   -0.17    0.47
   9 -15  -1   -0.51    0.83
  -8 -12   1    1.77    1.08
   8  12  -1    2.12    0.81
   8  12  -1   -0.15    0.86
   8  12  -1    0.35    1.13
  -8 -11   1    0.47    0.89
   8  11  -1    2.47    0.80
   8  11  -1    1.42    0.98
   8  11  -1    2.00    0.73
  -8 -10   1    0.10    0.81
  -8 -10   1   -0.27    0.56
   8  10  -1    0.32    0.61
   8  10  -1    1.09    1.04
   8  10  -1    0.02    0.63
   8  10  -1    1.16    0.93
  -8  -9   1    0.13    0.57
  -8  -9   1    0.11    0.73
   8   9  -1   -0.81    0.57
   8   9  -1   -1.02    0.83
   8   9  -1    0.00    0.75
   8   9  -1   -0.04    0.78
  -8  -8   1    3.63    0.67
  -8  -8   1    2.61    0.60
  -8  -8   1    2.83    0.75
  -8  -8   1    3.15    0.90
   8   8  -1    2.52    0.59
   8   8  -1    3.28    0.54
   8   8  -1    3.17    0.52
   8   8  -1    3.36    0.65
   8   8  -1    2.72    0.94
   8   8  -1    3.67    0.80
   8   8  -1    2.96    0.76
   8   8  -1    3.04    0.59
  -8  -7   1   -0.27    0.64
  -8  -7   1   -0.18    0.50
  -8  -7   1   -0.63    0.53
  -8  -7   1   -0.01    0.53
   8   7  -1   -0.16    0.45
   8   7  -1    0.39    0.37
   8   7  -1    0.40    0.67
   8   7  -1   -0.01    0.57
   8   7  -1    0.04    0.45
   8   7  -1   -0.82    0.79
   8   7  -1    0.17    0.45
   8   7  -1    0.36    0.45
  -8  -6   1    0.03    0.50
  -8  -6   1    0.80    0.48
  -8  -6   1   -0.07    0.46
  -8  -6   1    0.46    0.52
  -8  -6   1    0.86    0.60
   8   6  -1   -0.66    0.76
   8   6  -1    0.65    0.43
   8   6  -1    0.69    0.48
   8   6  -1    0.57    0.52
   8   6  -1    0.40    0.61
   8   6  -1    0.29    0.43
   8   6  -1    0.87    0.45
  -8  -5   1    1.71    0.41
  -8  -5   1    1.44    0.51
  -8  -5   1    0.75    0.45
  -8  -5   1    1.27    0.49
  -8  -5   1    0.56    0.46
  -8  -5   1    1.55    0.58
   8   5  -1    0.70    0.43
   8   5  -1    0.99    0.47
   8   5  -1    1.18    0.44
   8   5  -1    1.13    0.45
   8   5  -1    0.75    0.53
   8   5  -1    1.40    0.76
   8   5  -1    1.49    0.61
   8   5  -1    1.07    0.41
  -8  -4   1   19.18    1.60
  -8  -4   1   19.25    1.50
  -8  -4   1   19.33    1.50
  -8  -4   1   17.16    1.54
  -8  -4   1   20.11    1.70
  -8  -4   1   21.38    1.55
   8   4  -1   19.32    1.68
   8   4  -1   19.27    1.50
   8   4  -1   19.30    1.71
   8   4  -1   18.71    1.61
   8   4  -1   20.27    1.48
   8   4  -1   19.13    1.58
   8   4  -1   18.76    1.49
   8   4  -1   18.79    1.56
  -8  -3   1    0.87    0.38
  -8  -3   1    1.30    0.38
  -8  -3   1    1.11    0.40
  -8  -3   1    0.91    0.48
  -8  -3   1    0.78    0.48
  -8  -3   1    1.20    0.43
   8   3  -1    0.95    0.37
   8   3  -1    0.88    0.34
   8   3  -1    1.14    0.39
   8   3  -1    1.97    0.65
   8   3  -1    0.52    0.52
   8   3  -1    1.22    0.61
   8   3  -1    1.01    0.40
  -8  -2   1    7.02    0.82
  -8  -2   1    7.32    0.75
  -8  -2   1    7.49    0.73
  -8  -2   1    4.94    0.78
  -8  -2   1    7.33    0.83
  -8  -2   1    7.87    1.05
   8   2  -1    7.63    0.97
   8   2  -1    7.50    0.69
   8   2  -1    7.70    0.77
   8   2  -1    6.98    0.90
   8   2  -1    7.43    0.79
   8   2  -1    6.72    0.83
  -8  -1   1    2.11    0.36
  -8  -1   1    2.53    0.41
  -8  -1   1    1.88    0.38
  -8  -1   1    1.90    0.34
  -8  -1   1    1.98    0.43
  -8  -1   1    1.64    0.46
   8   1  -1    1.56    0.34
   8   1  -1    1.89    0.37
   8   1  -1    2.57    0.35
   8   1  -1    2.74    0.56
   8   1  -1    1.45    0.63
   8   1  -1    2.11    0.35
  -8   0   1    0.98    0.39
  -8   0   1    2.03    0.31
  -8   0   1    1.77    0.40
  -8   0   1    1.23    0.34
  -8   0   1    1.40    0.32
   8   0  -1    1.89    0.33
   8   0  -1    1.51    0.52
   8   0  -1    1.23    0.30
   8   0  -1    1.65    0.32
   8   0  -1    2.44    0.51
   8   0  -1    1.06    0.31
  -8   1   1    6.65    0.80
  -8   1   1    9.19    0.83
  -8   1   1    8.27    0.74
  -8   1   1    9.46    0.75
   8  -1  -1    8.48    0.80
   8  -1  -1    8.45    0.78
   8  -1  -1    9.50    0.75
   8  -1  -1    9.01    0.79
   8  -1  -1    8.14    0.91
   8  -1  -1    9.08    0.97
  -8   2   1    0.70    0.26
  -8   2   1    0.48    0.37
  -8   2   1    0.49    0.26
  -8   2   1    0.90    0.36
  -8   2   1    0.50    0.24
   8  -2  -1    0.96    0.44
   8  -2  -1    0.77    0.25
   8  -2  -1    0.58    0.27
   8  -2  -1    0.13    0.25
   8  -2  -1    0.73    0.31
   8  -2  -1    0.91    0.75
   8  -2  -1    0.56    0.39
  -8   3   1    7.03    0.60
  -8   3   1    7.56    0.75
  -8   3   1    6.56    0.60
  -8   3   1    7.23    0.77
  -8   3   1    6.99    0.67
   8  -3  -1    6.50    0.84
   8  -3  -1    6.31    0.62
   8  -3  -1    7.71    0.88
   8  -3  -1    6.76    0.98
   8  -3  -1    6.54    0.74
   8  -3  -1    7.07    0.67
  -8   4   1    1.71    0.26
  -8   4   1    2.31    0.34
  -8   4   1    1.69    0.28
  -8   4   1    2.35    0.47
  -8   4   1    1.57    0.42
   8  -4  -1    1.66    0.30
   8  -4  -1    2.01    0.47
   8  -4  -1    2.42    0.53
   8  -4  -1    2.17    0.55
   8  -4  -1    2.25    0.28
   8  -4  -1    2.28    0.39
  -8   5   1    0.38    0.35
  -8   5   1    0.06    0.22
  -8   5   1    0.02    0.36
  -8   5   1    0.32    0.23
  -8   5   1    0.03    0.21
   8  -5  -1   -0.18    0.41
   8  -5  -1    0.50    0.48
   8  -5  -1    0.09    0.24
   8  -5  -1    0.09    0.23
   8  -5  -1    0.29    0.36
  -8   6   1    0.08    0.24
  -8   6   1    0.08    0.47
  -8   6   1   -0.03    0.36
  -8   6   1   -0.20    0.23
  -8   6   1   -0.17    0.17
  -8   6   1    0.01    0.36
  -8   6   1    0.21    0.22
   8  -6  -1    0.01    0.23
   8  -6  -1    0.07    0.50
   8  -6  -1   -0.07    0.39
   8  -6  -1    0.29    0.24
   8  -6  -1    0.15    0.46
  -8   7   1   21.27    1.71
  -8   7   1   19.41    1.63
  -8   7   1   22.17    1.62
  -8   7   1   22.33    1.50
  -8   7   1   21.13    1.70
  -8   7   1   19.31    1.48
  -8   7   1   18.64    1.51
   8  -7  -1   20.90    1.90
   8  -7  -1   21.43    1.66
   8  -7  -1   22.22    1.50
   8  -7  -1   21.44    1.51
   8  -7  -1   20.71    1.79
  -8   8   1   -0.12    0.21
  -8   8   1    0.26    0.62
  -8   8   1   -0.31    0.42
  -8   8   1   -0.39    0.44
  -8   8   1   -0.40    0.44
  -8   8   1   -0.01    0.22
   8  -8  -1    0.30    0.25
   8  -8  -1   -1.02    0.59
   8  -8  -1   -0.31    0.36
   8  -8  -1    0.26    0.57
   8  -8  -1   -0.66    0.47
  -8   9   1   14.34    1.59
  -8   9   1   19.28    1.41
  -8   9   1   14.77    1.27
  -8   9   1   17.74    1.55
  -8   9   1   17.03    1.22
  -8   9   1   14.90    1.41
   8  -9  -1   16.86    1.50
   8  -9  -1   16.27    1.32
   8  -9  -1   17.97    1.25
   8  -9  -1   19.48    1.91
   8  -9  -1   16.73    1.66
  -8  10   1    0.67    0.64
  -8  10   1   -0.90    0.57
  -8  10   1   -0.47    0.46
  -8  10   1   -0.01    0.23
  -8  10   1   -0.70    0.52
  -8  10   1    0.03    0.26
   8 -10  -1   -0.18    0.70
   8 -10  -1    0.18    0.44
   8 -10  -1    0.13    0.28
   8 -10  -1    0.03    0.54
   8 -10  -1    0.88    0.82
  -8  11   1    2.60    0.77
  -8  11   1    3.00    0.69
  -8  11   1    3.00    0.57
  -8  11   1    2.80    0.79
  -8  11   1    3.53    0.50
  -8  11   1    3.40    0.37
   8 -11  -1    2.52    0.58
   8 -11  -1    2.92    0.39
   8 -11  -1    2.26    0.68
   8 -11  -1    1.90    0.84
  -8  12   1    1.30    0.60
  -8  12   1    1.28    0.34
  -8  12   1    1.60    0.33
  -8  12   1    1.15    0.47
  -8  12   1    0.09    0.76
   8 -12  -1    0.40    0.57
   8 -12  -1    0.62    0.66
   8 -12  -1    1.14    0.35
   8 -12  -1    1.02    0.93
   8 -13  -1    3.19    0.78
   8 -13  -1    3.35    0.81
  -8  14   1    3.11    0.71
  -8  14   1    2.95    0.45
  -8  14   1    1.46    0.95
   8 -14  -1    1.20    0.78
   8 -14  -1    1.76    0.46
   8 -14  -1    1.35    0.80
  -8  15   1    0.96    0.67
  -8  15   1    1.58    0.47
  -8  15   1    2.55    1.01
   8 -15  -1    1.63    0.91
   8 -15  -1    1.22    0.50
   8 -15  -1    0.56    0.86
  -8  16   1    1.80    1.21
  -8  16   1    0.47    0.52
   8 -16  -1    0.21    1.00
   8 -16  -1    1.22    0.55
   8 -16  -1    0.33    0.98
  -7 -13   1   -0.96    1.06
   7  13  -1    1.50    0.85
   7  13  -1    1.06    1.12
   7  13  -1    1.09    0.83
  -7 -12   1    0.79    0.97
   7  12  -1    2.09    1.03
   7  12  -1    1.64    0.76
   7  12  -1    0.98    0.78
  -7 -11   1    2.72    0.94
   7  11  -1    1.85    0.73
   7  11  -1    2.46    0.72
   7  11  -1    3.31    1.03
  -7 -10   1    1.59    0.56
  -7 -10   1    1.55    0.78
   7  10  -1    1.50    0.64
   7  10  -1    1.44    0.63
   7  10  -1    1.69    0.90
   7  10  -1    3.44    0.94
  -7  -9   1    0.84    0.76
  -7  -9   1    0.47    0.76
  -7  -9   1    0.45    0.51
  -7  -9   1    1.12    0.54
   7   9  -1    1.11    0.78
   7   9  -1    0.72    0.50
   7   9  -1    0.43    1.01
   7   9  -1    0.00    0.55
   7   9  -1    0.13    0.81
   7   9  -1    0.30    0.80
  -7  -8   1    7.58    0.89
  -7  -8   1    7.58    1.15
  -7  -8   1    6.20    0.92
  -7  -8   1    8.96    1.05
  -7  -8   1    9.39    1.19
   7   8  -1    9.13    0.99
   7   8  -1    7.80    1.29
   7   8  -1    6.87    0.73
   7   8  -1    7.18    1.01
   7   8  -1    7.32    0.95
   7   8  -1    7.27    1.17
   7   8  -1    7.66    0.88
   7   8  -1    9.10    1.36
  -7  -7   1    3.31    0.55
  -7  -7   1    2.94    0.55
  -7  -7   1    2.56    0.55
  -7  -7   1    3.97    0.74
  -7  -7   1    1.20    0.61
   7   7  -1    2.80    0.53
   7   7  -1    2.85    0.70
   7   7  -1    3.29    0.50
   7   7  -1    3.52    0.56
   7   7  -1    4.49    0.56
   7   7  -1    2.98    0.81
   7   7  -1    2.97    0.53
   7   7  -1    2.73    0.61
  -7  -6   1    2.98    0.54
  -7  -6   1    1.95    0.54
  -7  -6   1    3.03    0.61
  -7  -6   1    3.13    0.56
  -7  -6   1    3.40    0.53
  -7  -6   1    3.49    0.54
   7   6  -1    2.98    0.64
   7   6  -1    3.80    0.51
   7   6  -1    3.39    0.58
   7   6  -1    3.58    0.53
   7   6  -1    4.19    0.49
   7   6  -1    3.52    0.53
  -7  -5   1   16.92    1.36
  -7  -5   1   15.51    1.46
  -7  -5   1   15.21    1.42
  -7  -5   1   17.51    1.44
  -7  -5   1   17.13    1.50
  -7  -5   1   16.90    1.30
  -7  -5   1   14.03    1.34
   7   5  -1   17.82    1.34
   7   5  -1   17.78    1.57
   7   5  -1   16.78    1.47
   7   5  -1   18.17    1.34
   7   5  -1   16.51    1.44
   7   5  -1   16.14    1.49
   7   5  -1   17.45    1.39
   7   5  -1   16.89    1.34
  -7  -4   1   66.55    4.10
  -7  -4   1   57.40    4.04
  -7  -4   1   59.81    4.10
  -7  -4   1   54.74    4.10
  -7  -4   1   57.21    4.07
  -7  -4   1   56.73    4.04
  -7  -4   1   58.05    4.13
   7   4  -1   59.78    4.04
   7   4  -1   58.82    4.14
   7   4  -1   56.33    4.08
   7   4  -1   55.80    4.04
   7   4  -1   58.29    4.04
   7   4  -1   58.13    4.13
   7   4  -1   58.85    4.09
  -7  -3   1    0.35    0.32
  -7  -3   1    0.31    0.35
  -7  -3   1    0.66    0.34
  -7  -3   1   -0.07    0.38
  -7  -3   1    0.55    0.41
  -7  -3   1    0.64    0.31
  -7  -3   1    0.40    0.38
   7   3  -1    1.02    0.32
   7   3  -1    1.26    0.49
   7   3  -1    0.72    0.35
   7   3  -1    0.81    0.30
   7   3  -1    0.74    0.45
   7   3  -1    0.72    0.34
   7   3  -1    0.55    0.30
   7   3  -1    0.37    0.31
  -7  -2   1   21.04    1.55
  -7  -2   1   20.89    1.58
  -7  -2   1   20.55    1.53
  -7  -2   1   20.47    1.52
  -7  -2   1   21.14    1.66
  -7  -2   1   20.07    1.59
  -7  -2   1   21.96    1.58
   7   2  -1   21.67    1.63
   7   2  -1   20.73    1.53
   7   2  -1   19.57    1.59
   7   2  -1   20.74    1.58
   7   2  -1   22.01    1.51
   7   2  -1   19.85    1.55
  -7  -1   1    5.44    0.65
  -7  -1   1    5.32    0.57
  -7  -1   1    4.71    0.72
  -7  -1   1    5.55    0.59
  -7  -1   1    4.82    0.82
  -7  -1   1    5.59    0.59
  -7  -1   1    4.93    0.62
   7   1  -1    4.49    0.64
   7   1  -1    4.91    0.55
   7   1  -1    5.81    0.74
   7   1  -1    4.91    0.58
   7   1  -1    5.14    0.75
   7   1  -1    6.15    0.58
  -7   0   1    9.24    0.76
  -7   0   1    8.96    0.80
  -7   0   1    8.45    0.75
   7   0  -1    8.52    0.76
   7   0  -1    9.46    0.93
   7   0  -1    8.53    0.77
   7   0  -1    9.25    0.89
   7   0  -1   10.19    0.79
   7   0  -1    8.48    0.80
  -7   1   1    0.36    0.22
  -7   1   1    0.12    0.33
  -7   1   1    0.68    0.24
  -7   1   1    0.46    0.31
   7  -1  -1    1.01    0.42
   7  -1  -1    0.66    0.28
   7  -1  -1    0.38    0.23
   7  -1  -1    0.31    0.22
   7  -1  -1    0.23    0.23
   7  -1  -1   -0.15    0.38
  -7   2   1   24.28    1.78
  -7   2   1   25.67    1.76
  -7   2   1   22.55    1.73
  -7   2   1   25.91    1.80
  -7   2   1   23.95    1.73
   7  -2  -1   25.48    1.74
   7  -2  -1   23.42    1.90
   7  -2  -1   24.92    1.76
   7  -2  -1   24.66    1.86
   7  -2  -1   24.31    1.75
   7  -2  -1   24.07    1.83
   7  -2  -1   26.41    1.78
  -7   3   1    2.43    0.29
  -7   3   1    2.25    0.40
  -7   3   1    2.56    0.46
  -7   3   1    2.69    0.41
  -7   3   1    2.27    0.25
   7  -3  -1    2.50    0.28
   7  -3  -1    1.98    0.30
   7  -3  -1    1.96    0.44
   7  -3  -1    2.20    0.50
   7  -3  -1    2.61    0.36
   7  -3  -1    2.94    0.49
   7  -3  -1    2.31    0.29
  -7   4   1   19.85    1.42
  -7   4   1   19.63    1.40
  -7   4   1   18.55    1.49
  -7   4   1   20.46    1.50
   7  -4  -1   19.90    1.49
   7  -4  -1   20.92    1.42
   7  -4  -1   20.46    1.43
   7  -4  -1   19.60    1.40
   7  -4  -1   20.24    1.58
   7  -4  -1   19.68    1.61
   7  -4  -1   18.44    1.46
  -7   5   1    4.23    0.40
  -7   5   1    4.18    0.48
  -7   5   1    3.47    0.58
  -7   5   1    3.36    0.58
  -7   5   1    3.72    0.42
  -7   5   1    3.97    0.65
  -7   5   1    3.37    0.40
  -7   5   1    4.40    0.62
   7  -5  -1    3.28    0.47
   7  -5  -1    2.94    0.52
   7  -5  -1    4.20    0.43
   7  -5  -1    4.17    0.46
   7  -5  -1    4.68    0.61
   7  -5  -1    3.82    0.75
  -7   6   1   27.68    2.12
  -7   6   1   29.44    2.11
  -7   6   1   26.74    2.08
  -7   6   1   27.34    2.00
  -7   6   1   29.14    2.07
  -7   6   1   26.26    1.97
  -7   6   1   27.79    1.99
  -7   6   1   31.03    1.98
   7  -6  -1   27.70    2.24
   7  -6  -1   28.24    2.18
   7  -6  -1   29.57    2.00
   7  -6  -1   28.06    2.09
   7  -6  -1   32.01    1.99
  -7   7   1   12.42    1.00
  -7   7   1   10.92    1.02
  -7   7   1   11.61    0.85
  -7   7   1   11.65    0.85
  -7   7   1    9.91    0.89
  -7   7   1   13.15    1.13
  -7   7   1   10.98    1.15
   7  -7  -1   11.33    1.06
   7  -7  -1   10.53    1.31
   7  -7  -1   12.26    0.89
   7  -7  -1   12.41    0.87
   7  -7  -1   12.05    1.19
  -7   8   1   11.18    0.83
  -7   8   1   11.71    1.17
  -7   8   1   10.88    1.19
  -7   8   1   10.60    1.01
  -7   8   1    9.96    0.83
  -7   8   1   10.51    0.96
   7  -8  -1   10.68    1.13
   7  -8  -1   10.68    1.23
   7  -8  -1   11.96    0.93
   7  -8  -1   11.68    1.40
   7  -8  -1   11.13    0.83
  -7   9   1    9.75    0.71
  -7   9   1    9.18    0.88
  -7   9   1    8.43    0.92
  -7   9   1    8.13    1.23
  -7   9   1    9.23    0.71
  -7   9   1    6.30    1.19
   7  -9  -1    8.26    0.87
   7  -9  -1    6.53    1.05
   7  -9  -1    8.94    1.24
   7  -9  -1    9.13    0.71
  -7  10   1   -0.02    0.43
  -7  10   1    0.42    0.47
  -7  10   1   -0.58    0.54
  -7  10   1    0.44    0.25
  -7  10   1    0.15    0.67
  -7  10   1    0.58    0.25
   7 -10  -1   -1.15    0.52
   7 -10  -1    0.28    0.63
   7 -10  -1    0.90    0.45
   7 -10  -1    1.35    0.73
   7 -10  -1    0.45    0.27
  -7  11   1    3.23    0.50
  -7  11   1    1.80    0.54
  -7  11   1    2.72    0.36
  -7  11   1    3.55    0.83
  -7  11   1    1.52    0.74
  -7  11   1    3.20    0.36
   7 -11  -1    1.81    0.75
   7 -11  -1    5.14    0.97
   7 -11  -1    2.94    0.38
   7 -11  -1    2.73    0.58
   7 -12  -1    2.64    0.61
   7 -12  -1    1.74    0.38
   7 -12  -1    1.77    0.84
  -7  13   1   14.77    1.51
  -7  13   1   13.93    1.12
  -7  13   1   16.03    1.68
   7 -13  -1   13.19    1.38
   7 -13  -1   13.53    1.15
  -7  14   1    1.29    0.77
   7 -14  -1    1.28    0.75
   7 -14  -1    0.97    0.76
   7 -14  -1    2.11    0.46
  -7  15   1    6.56    0.78
  -7  15   1    6.36    1.17
   7 -15  -1    4.41    0.94
   7 -15  -1    3.21    0.97
   7 -15  -1    6.09    0.83
  -7  16   1    2.06    0.59
  -7  16   1    3.01    1.17
   7 -16  -1    1.82    0.58
   7 -16  -1    3.93    1.04
   7 -16  -1    1.65    1.00
  -6 -14   1   -1.25    1.09
   6  14  -1    0.56    0.82
   6  14  -1   -0.17    1.09
   6  14  -1    0.03    0.89
  -6 -13   1    1.43    0.97
   6  13  -1    0.01    0.80
   6  13  -1    1.70    0.79
   6  13  -1    2.55    1.01
  -6 -12   1    0.98    0.89
   6  12  -1    0.29    0.88
   6  12  -1   -0.46    0.67
   6  12  -1    1.08    0.68
  -6 -11   1    3.55    0.92
   6  11  -1    4.01    1.09
   6  11  -1    3.68    0.70
   6  11  -1    3.58    0.75
   6  11  -1    4.79    0.97
  -6 -10   1    0.26    0.64
  -6 -10   1    0.30    0.46
  -6 -10   1   -0.90    0.71
   6  10  -1   -0.45    0.77
   6  10  -1   -1.26    0.77
   6  10  -1   -0.37    0.55
   6  10  -1   -0.88    0.55
  -6  -9   1    9.98    1.15
  -6  -9   1    9.75    0.97
  -6  -9   1    9.51    1.14
  -6  -9   1    7.80    1.30
   6   9  -1    9.61    1.10
   6   9  -1    8.54    1.27
   6   9  -1    9.95    1.56
   6   9  -1    9.17    1.23
   6   9  -1   10.58    1.35
   6   9  -1   10.14    1.05
  -6  -8   1   -0.65    0.54
  -6  -8   1   -0.35    0.42
  -6  -8   1    0.22    0.64
  -6  -8   1    0.04    0.41
   6   8  -1   -0.43    0.60
   6   8  -1   -0.08    0.43
   6   8  -1   -1.16    0.69
   6   8  -1    0.01    0.58
   6   8  -1   -0.44    0.42
   6   8  -1   -0.41    0.41
  -6  -7   1   19.50    1.66
  -6  -7   1   17.06    2.06
  -6  -7   1   17.55    1.54
  -6  -7   1   16.84    1.43
  -6  -7   1   18.64    1.49
  -6  -7   1   16.85    1.59
   6   7  -1   17.67    1.48
   6   7  -1   18.03    1.50
   6   7  -1   20.15    1.44
   6   7  -1   16.56    1.60
   6   7  -1   19.31    1.69
   6   7  -1   19.39    1.46
   6   7  -1   19.52    1.36
  -6  -6   1   -0.10    0.39
  -6  -6   1   -0.32    0.38
  -6  -6   1    0.08    0.41
  -6  -6   1    1.21    0.51
  -6  -6   1   -0.14    0.41
  -6  -6   1    0.52    0.38
   6   6  -1   -0.25    0.39
   6   6  -1   -0.70    0.50
   6   6  -1   -0.17    0.66
   6   6  -1    0.63    0.36
   6   6  -1    0.13    0.37
   6   6  -1    0.36    0.40
   6   6  -1   -0.19    0.44
  -6  -5   1   43.50    2.92
  -6  -5   1   40.10    2.92
  -6  -5   1   39.41    2.82
  -6  -5   1   38.02    2.86
  -6  -5   1   38.90    2.91
  -6  -5   1   40.51    2.85
  -6  -5   1   46.32    2.91
   6   5  -1   37.59    2.93
   6   5  -1   40.27    2.85
   6   5  -1   41.05    2.85
   6   5  -1   42.12    2.89
   6   5  -1   41.02    2.96
   6   5  -1   37.08    2.89
   6   5  -1   40.94    2.94
   6   5  -1   41.55    2.87
  -6  -4   1    3.24    0.48
  -6  -4   1    2.00    0.39
  -6  -4   1    1.73    0.40
  -6  -4   1    2.37    0.34
  -6  -4   1    1.40    0.38
  -6  -4   1    2.49    0.36
  -6  -4   1    2.56    0.40
   6   4  -1    2.81    0.37
   6   4  -1    2.61    0.37
   6   4  -1    2.41    0.53
   6   4  -1    1.86    0.36
   6   4  -1    2.13    0.39
   6   4  -1    2.74    0.56
   6   4  -1    2.72    0.39
   6   4  -1    1.85    0.38
  -6  -3   1   41.02    3.02
  -6  -3   1   47.61    3.01
  -6  -3   1   41.60    2.98
  -6  -3   1   45.23    3.01
  -6  -3   1   41.76    2.97
  -6  -3   1   43.30    3.04
  -6  -3   1   43.15    3.02
   6   3  -1   39.40    3.01
   6   3  -1   43.97    2.97
   6   3  -1   41.79    2.97
   6   3  -1   43.12    3.05
   6   3  -1   40.99    3.01
   6   3  -1   43.23    3.01
   6   3  -1   42.74    3.05
   6   3  -1   42.89    2.98
  -6  -2   1   23.68    1.81
  -6  -2   1   22.14    1.72
  -6  -2   1   23.84    1.73
  -6  -2   1   24.49    1.71
  -6  -2   1   23.71    1.75
  -6  -2   1   24.33    1.71
  -6  -2   1   24.03    1.75
   6   2  -1   23.58    1.70
   6   2  -1   22.72    1.71
   6   2  -1   23.27    1.76
   6   2  -1   25.88    1.70
   6   2  -1   24.35    1.79
   6   2  -1   24.09    1.75
   6   2  -1   23.81    1.73
  -6  -1   1   21.70    1.53
  -6  -1   1   21.83    1.65
  -6  -1   1   17.67    1.54
  -6  -1   1   20.80    1.57
  -6  -1   1   20.80    1.57
  -6  -1   1   21.56    1.56
  -6  -1   1   21.16    1.55
   6   1  -1   22.48    1.62
   6   1  -1   22.13    1.64
   6   1  -1   21.86    1.54
   6   1  -1   23.22    1.54
   6   1  -1   21.16    1.56
   6   1  -1   22.04    1.57
  -6   0   1   12.73    1.00
  -6   0   1   14.28    0.98
  -6   0   1   12.94    1.01
  -6   0   1   13.94    0.99
  -6   0   1   11.32    1.01
  -6   0   1   12.43    1.14
   6   0  -1   12.85    0.99
   6   0  -1   13.23    0.97
   6   0  -1   12.70    1.01
   6   0  -1   12.50    1.08
   6   0  -1   12.55    1.02
   6   0  -1   13.69    1.12
  -6   1   1    8.84    0.72
  -6   1   1    7.24    0.66
  -6   1   1    8.33    0.70
  -6   1   1    7.66    0.72
  -6   1   1    8.53    0.67
   6  -1  -1    6.85    0.71
   6  -1  -1    8.07    0.75
   6  -1  -1    7.96    0.67
   6  -1  -1   10.02    0.72
   6  -1  -1    7.57    0.69
  -6   2   1   79.52    6.07
  -6   2   1   92.84    6.12
  -6   2   1   91.35    6.09
  -6   2   1   86.86    6.11
  -6   2   1   88.56    6.09
   6  -2  -1   89.96    6.18
   6  -2  -1   92.41    6.09
   6  -2  -1   88.38    6.13
   6  -2  -1   91.28    6.09
   6  -2  -1   94.51    6.14
   6  -2  -1   86.23    6.08
   6  -2  -1   87.20    6.07
  -6   3   1    1.08    0.22
  -6   3   1    1.16    0.22
  -6   3   1    1.17    0.32
  -6   3   1    1.15    0.32
  -6   3   1    1.28    0.21
   6  -3  -1    0.84    0.21
   6  -3  -1    1.86    0.30
   6  -3  -1    1.15    0.23
   6  -3  -1    1.11    0.36
   6  -3  -1    2.19    0.43
   6  -3  -1    1.00    0.22
  -6   4   1   -0.09    0.29
  -6   4   1   -0.24    0.31
  -6   4   1   -0.07    0.15
  -6   4   1   -0.15    0.26
  -6   4   1   -0.16    0.17
  -6   4   1   -0.13    0.23
   6  -4  -1   -0.44    0.27
   6  -4  -1   -0.52    0.30
   6  -4  -1   -0.35    0.23
   6  -4  -1   -0.33    0.18
   6  -4  -1   -0.35    0.17
   6  -4  -1   -0.36    0.36
   6  -4  -1   -0.29    0.18
  -6   5   1    3.63    0.54
  -6   5   1    3.48    0.36
  -6   5   1    4.06    0.41
  -6   5   1    3.46    0.54
  -6   5   1    4.05    0.36
  -6   5   1    4.59    0.62
  -6   5   1    3.43    0.51
  -6   5   1    3.51    0.44
   6  -5  -1    4.03    0.67
   6  -5  -1    4.42    0.37
   6  -5  -1    4.00    0.42
   6  -5  -1    3.63    0.43
   6  -5  -1    3.71    0.45
   6  -5  -1    2.73    0.48
  -6   6   1   17.26    1.26
  -6   6   1   18.38    1.42
  -6   6   1   20.81    1.44
  -6   6   1   19.03    1.35
  -6   6   1   17.75    1.37
  -6   6   1   16.14    1.29
  -6   6   1   17.27    1.26
   6  -6  -1   18.02    1.28
   6  -6  -1   17.96    1.47
   6  -6  -1   17.08    1.38
   6  -6  -1   17.76    1.26
   6  -6  -1   17.83    1.51
   6  -6  -1   19.36    1.29
  -6   7   1    6.18    0.57
  -6   7   1    7.37    0.57
  -6   7   1    7.58    0.63
  -6   7   1    8.22    0.91
  -6   7   1    8.67    0.73
  -6   7   1    7.32    0.86
  -6   7   1    7.23    0.74
   6  -7  -1    6.53    1.06
   6  -7  -1    8.18    0.68
   6  -7  -1    8.37    0.94
   6  -7  -1    7.42    0.63
   6  -7  -1    6.78    0.81
   6  -7  -1    6.86    0.58
  -6   8   1   23.16    1.75
  -6   8   1   23.77    1.90
  -6   8   1   25.52    1.88
  -6   8   1   19.88    1.63
  -6   8   1   25.59    1.73
  -6   8   1   22.87    1.64
   6  -8  -1   21.26    1.64
   6  -8  -1   24.87    1.92
   6  -8  -1   25.06    2.00
   6  -8  -1   24.76    1.72
  -6   9   1   -0.40    0.37
  -6   9   1    0.10    0.57
  -6   9   1   -0.24    0.21
  -6   9   1   -0.19    0.38
  -6   9   1   -0.57    0.21
  -6   9   1   -0.66    0.44
   6  -9  -1   -0.70    0.56
   6  -9  -1   -0.53    0.56
   6  -9  -1   -0.49    0.24
   6  -9  -1   -0.61    0.40
  -6  10   1    0.69    0.41
  -6  10   1    0.65    0.25
  -6  10   1    0.37    0.36
  -6  10   1   -0.21    0.51
  -6  10   1    0.63    0.31
  -6  10   1    0.54    0.64
   6 -10  -1    0.84    0.44
   6 -10  -1    1.34    0.65
   6 -10  -1   -0.04    0.28
   6 -10  -1   -0.05    0.63
  -6  11   1    0.18    0.28
  -6  11   1    0.08    0.29
  -6  11   1    0.04    0.66
  -6  11   1   -0.17    0.37
  -6  11   1    0.04    0.44
  -6  11   1   -0.12    0.71
   6 -11  -1    0.11    0.30
   6 -11  -1   -0.98    0.65
   6 -11  -1    0.66    0.51
   6 -11  -1    1.47    0.70
  -6  12   1   17.08    1.56
  -6  12   1   14.87    1.12
  -6  12   1   14.85    1.30
   6 -12  -1   12.02    1.64
   6 -12  -1   13.84    1.33
   6 -12  -1   13.07    1.13
  -6  13   1    3.31    0.90
  -6  13   1    2.68    0.43
  -6  13   1    3.17    0.57
   6 -13  -1    2.06    0.46
   6 -13  -1    3.68    1.67
   6 -13  -1    2.31    0.70
  -6  14   1    9.17    0.93
  -6  14   1    8.82    1.12
  -6  14   1   11.22    1.52
   6 -14  -1    8.28    0.93
   6 -14  -1    9.93    1.27
  -6  15   1    6.54    0.86
  -6  15   1    7.19    1.20
   6 -15  -1    7.02    1.02
   6 -15  -1    5.97    0.87
  -6  16   1    3.09    1.12
   6 -16  -1    4.67    1.05
  -5 -14   1    1.27    1.01
   5  14  -1   -1.36    0.95
   5  14  -1    0.27    0.80
   5  14  -1    0.65    0.79
  -5 -13   1   -0.42    0.87
   5  13  -1    0.59    0.75
   5  13  -1    0.67    0.95
   5  13  -1   -0.06    0.64
  -5 -12   1    2.35    0.87
   5  12  -1    1.57    0.69
   5  12  -1    1.58    0.64
   5  12  -1    3.41    0.91
  -5 -11   1    1.25    0.78
   5  11  -1    2.16    0.85
   5  11  -1    1.31    0.59
   5  11  -1    3.02    0.86
   5  11  -1    1.60    0.62
  -5 -10   1    3.39    0.52
  -5 -10   1    3.01    0.67
  -5 -10   1    2.61    0.74
   5  10  -1    3.02    0.80
   5  10  -1    2.99    0.80
   5  10  -1    3.15    0.58
   5  10  -1    2.70    0.63
  -5  -9   1   11.26    1.24
  -5  -9   1   11.25    1.12
  -5  -9   1    8.37    1.26
  -5  -9   1   11.27    0.98
   5   9  -1   10.37    1.50
   5   9  -1   10.31    1.13
   5   9  -1   12.42    1.09
   5   9  -1   11.84    1.16
   5   9  -1   10.32    1.32
   5   9  -1   11.53    1.31
  -5  -8   1   -0.34    0.35
  -5  -8   1    0.34    0.46
  -5  -8   1   -0.43    0.57
  -5  -8   1   -0.28    0.39
   5   8  -1   -0.43    0.42
   5   8  -1   -0.10    0.52
   5   8  -1    0.28    0.42
   5   8  -1    0.44    0.39
   5   8  -1    0.08    0.57
  -5  -7   1   31.05    2.23
  -5  -7   1   29.80    2.27
  -5  -7   1   34.23    2.30
  -5  -7   1   26.64    2.17
  -5  -7   1   30.80    2.30
   5   7  -1   30.32    2.24
   5   7  -1   30.63    2.23
   5   7  -1   31.90    2.35
   5   7  -1   30.50    2.20
   5   7  -1   28.44    2.31
   5   7  -1   30.16    2.38
  -5  -6   1    3.02    0.45
  -5  -6   1    2.31    0.43
  -5  -6   1    2.46    0.40
  -5  -6   1    3.64    0.61
  -5  -6   1    3.75    0.57
  -5  -6   1    2.55    0.42
   5   6  -1    2.12    0.62
   5   6  -1    1.70    0.54
   5   6  -1    3.19    0.37
   5   6  -1    2.43    0.49
   5   6  -1    2.28    0.44
   5   6  -1    3.52    0.46
   5   6  -1    3.17    0.40
   5   6  -1    2.25    0.41
  -5  -5   1    4.76    0.66
  -5  -5   1    3.64    0.49
  -5  -5   1    4.47    0.69
  -5  -5   1    3.97    0.54
  -5  -5   1    4.72    0.48
  -5  -5   1    4.30    0.65
  -5  -5   1    4.78    0.49
   5   5  -1    4.99    0.65
   5   5  -1    5.11    0.65
   5   5  -1    4.63    0.56
   5   5  -1    4.22    0.57
   5   5  -1    4.16    0.66
   5   5  -1    3.64    0.61
   5   5  -1    4.04    0.73
   5   5  -1    4.04    0.78
  -5  -4   1    8.10    0.82
  -5  -4   1    9.52    0.87
  -5  -4   1    8.99    0.86
  -5  -4   1    8.78    0.74
  -5  -4   1    9.00    0.80
  -5  -4   1    9.46    0.79
  -5  -4   1    9.78    0.85
   5   4  -1    8.82    0.94
   5   4  -1    8.88    0.76
   5   4  -1    9.55    0.83
   5   4  -1    9.31    0.79
   5   4  -1    9.43    0.79
   5   4  -1    7.92    1.14
   5   4  -1    9.88    0.85
   5   4  -1    8.60    0.89
  -5  -3   1   -0.01    0.25
  -5  -3   1   -0.21    0.28
  -5  -3   1   -0.21    0.23
  -5  -3   1    0.64    0.29
  -5  -3   1   -0.07    0.25
  -5  -3   1   -0.34    0.26
  -5  -3   1    0.28    0.22
   5   3  -1   -0.25    0.24
   5   3  -1    0.01    0.23
   5   3  -1   -0.25    0.25
   5   3  -1    0.09    0.24
   5   3  -1    0.33    0.40
   5   3  -1   -0.15    0.32
   5   3  -1   -0.32    0.26
   5   3  -1   -0.32    0.36
  -5  -2   1   24.78    1.78
  -5  -2   1   23.20    1.75
  -5  -2   1   23.36    1.77
  -5  -2   1   24.81    1.74
  -5  -2   1   28.80    1.75
  -5  -2   1   27.66    1.82
  -5  -2   1   22.06    1.77
  -5  -2   1   24.61    1.78
   5   2  -1   23.79    1.76
   5   2  -1   24.46    1.82
   5   2  -1   23.62    1.76
   5   2  -1   23.91    1.77
   5   2  -1   25.17    1.74
   5   2  -1   23.79    1.73
   5   2  -1   25.53    1.82
  -5  -1   1   38.21    2.56
  -5  -1   1   38.77    2.50
  -5  -1   1   35.57    2.50
  -5  -1   1   34.56    2.48
   5   1  -1   35.24    2.47
   5   1  -1   34.81    2.49
   5   1  -1   33.48    2.49
   5   1  -1   34.44    2.52
   5   1  -1   36.08    2.54
  -5   0   1    0.08    0.28
  -5   0   1    0.22    0.25
  -5   0   1    0.92    0.25
  -5   0   1    0.13    0.30
  -5   0   1   -0.09    0.19
  -5   0   1    0.37    0.24
  -5   0   1    0.18    0.19
   5   0  -1    0.67    0.29
   5   0  -1    0.12    0.20
   5   0  -1    0.08    0.19
   5   0  -1    0.00    0.19
  -5   1   1  110.96    7.97
  -5   1   1  133.63    8.01
  -5   1   1  102.78    8.00
   5  -1  -1  116.31    7.99
   5  -1  -1  115.80    8.01
   5  -1  -1  122.37    7.99
   5  -1  -1  117.77    7.97
   5  -1  -1  118.25    8.02
  -5   2   1   78.11    4.80
  -5   2   1   77.77    4.78
  -5   2   1   75.06    4.78
  -5   2   1   68.72    4.80
   5  -2  -1   69.20    4.79
   5  -2  -1   61.04    4.76
   5  -2  -1   65.35    4.77
   5  -2  -1   67.50    4.78
   5  -2  -1   69.75    4.83
   5  -2  -1   66.32    4.85
  -5   3   1   52.96    3.14
  -5   3   1   52.77    3.18
  -5   3   1   44.39    3.12
  -5   3   1   45.43    3.16
  -5   3   1   45.03    3.13
  -5   3   1   41.25    3.17
   5  -3  -1   39.01    3.15
   5  -3  -1   45.29    3.14
   5  -3  -1   46.61    3.21
   5  -3  -1   46.13    3.13
   5  -3  -1   44.85    3.12
   5  -3  -1   46.87    3.16
   5  -3  -1   42.60    3.22
  -5   4   1   10.02    0.86
  -5   4   1    9.71    0.80
  -5   4   1   10.54    0.74
  -5   4   1   11.01    0.82
  -5   4   1    9.68    0.71
  -5   4   1    9.00    0.76
   5  -4  -1   10.56    0.75
   5  -4  -1    9.45    0.86
   5  -4  -1    8.39    0.97
   5  -4  -1    8.99    0.84
   5  -4  -1    9.37    0.75
   5  -4  -1   10.22    0.72
   5  -4  -1   10.19    0.93
  -5   5   1    0.33    0.12
  -5   5   1    0.07    0.26
  -5   5   1    0.32    0.32
  -5   5   1    0.35    0.16
  -5   5   1    0.08    0.26
  -5   5   1    0.47    0.27
  -5   5   1    0.36    0.13
  -5   5   1    0.37    0.16
   5  -5  -1   -0.28    0.29
   5  -5  -1    0.54    0.17
   5  -5  -1    0.34    0.13
   5  -5  -1   -0.12    0.32
   5  -5  -1    0.29    0.15
  -5   6   1    9.07    0.75
  -5   6   1   11.16    0.88
  -5   6   1   11.02    0.84
  -5   6   1   10.55    0.76
  -5   6   1   11.70    0.80
  -5   6   1    8.82    0.91
   5  -6  -1   10.70    0.78
   5  -6  -1   11.40    0.83
   5  -6  -1   10.25    1.07
   5  -6  -1    9.82    0.76
   5  -6  -1   10.64    1.03
   5  -6  -1   11.54    0.81
  -5   7   1   29.65    2.08
  -5   7   1   28.17    1.98
  -5   7   1   27.92    1.90
  -5   7   1   23.92    1.89
  -5   7   1   29.21    1.95
  -5   7   1   29.59    2.05
   5  -7  -1   24.46    1.91
   5  -7  -1   24.54    1.90
   5  -7  -1   29.37    1.96
   5  -7  -1   29.66    2.10
   5  -7  -1   28.27    1.93
   5  -7  -1   26.69    2.14
  -5   8   1   10.87    0.87
  -5   8   1   11.58    1.21
  -5   8   1   12.58    0.94
  -5   8   1   11.79    0.99
  -5   8   1   12.69    1.14
  -5   8   1   11.56    0.92
  -5   8   1   11.99    0.88
   5  -8  -1   12.39    0.93
   5  -8  -1   12.63    0.99
   5  -8  -1   13.14    1.20
   5  -8  -1   12.67    1.26
   5  -8  -1   10.77    0.89
  -5   9   1    2.71    0.33
  -5   9   1    2.50    0.54
  -5   9   1    3.78    0.69
  -5   9   1    3.43    0.50
  -5   9   1    3.07    0.33
  -5   9   1    3.10    0.45
  -5   9   1    3.63    0.42
   5  -9  -1    3.43    0.35
   5  -9  -1    3.33    0.54
   5  -9  -1    3.64    0.51
   5  -9  -1    3.13    0.66
   5  -9  -1    3.22    0.64
  -5  10   1    3.39    0.37
  -5  10   1    3.43    0.52
  -5  10   1    3.29    0.48
  -5  10   1    2.67    0.61
   5 -10  -1    2.06    0.67
   5 -10  -1    3.38    0.55
   5 -10  -1    3.12    0.66
  -5  11   1   -0.16    0.63
  -5  11   1   -0.63    0.29
  -5  11   1   -0.21    0.39
  -5  11   1   -0.99    0.64
   5 -11  -1   -0.23    0.46
   5 -11  -1    0.53    0.63
   5 -11  -1   -0.57    0.32
  -5  12   1    1.57    0.80
  -5  12   1    4.86    0.58
  -5  12   1    2.90    0.40
  -5  12   1    3.17    0.51
   5 -12  -1    1.33    0.80
   5 -12  -1    3.16    0.73
   5 -12  -1    2.57    0.47
   5 -12  -1    1.89    0.44
   5 -12  -1    2.57    0.99
  -5  13   1    0.71    0.40
  -5  13   1    0.90    0.45
  -5  13   1    1.03    0.84
   5 -13  -1   -0.19    0.84
   5 -13  -1    0.91    0.76
   5 -13  -1    0.87    0.41
  -5  14   1    3.64    0.93
  -5  14   1    2.86    0.49
   5 -14  -1    3.53    0.81
   5 -14  -1    0.98    0.95
   5 -14  -1    2.52    0.51
  -5  15   1    0.70    0.47
  -5  15   1    1.89    0.99
   5 -15  -1    0.29    0.81
   5 -15  -1    0.63    0.52
  -5  16   1   11.54    1.21
  -5  16   1   14.19    1.73
   5 -16  -1   11.22    1.19
   5 -16  -1    8.21    1.35
  -4 -15   1    0.55    1.07
   4  15  -1   -0.68    0.94
   4  15  -1    0.11    0.80
   4  15  -1    0.51    1.02
  -4 -14   1   -0.95    0.90
   4  14  -1   -0.41    0.67
   4  14  -1    0.79    0.88
   4  14  -1    0.48    0.77
  -4 -13   1    0.12    0.76
   4  13  -1   -1.04    0.81
   4  13  -1   -0.38    0.63
   4  13  -1    0.27    0.73
  -4 -12   1   -0.98    0.71
   4  12  -1   -0.63    0.73
   4  12  -1   -0.27    0.54
   4  12  -1    0.53    0.63
  -4 -11   1    0.63    0.64
   4  11  -1    0.22    0.51
   4  11  -1    0.28    0.74
   4  11  -1    0.85    0.78
   4  11  -1    0.41    0.59
  -4 -10   1   -0.38    0.63
  -4 -10   1    0.62    0.37
  -4 -10   1    0.10    0.52
   4  10  -1   -0.78    0.66
   4  10  -1    0.17    0.41
   4  10  -1   -0.33    0.49
   4  10  -1   -0.28    0.69
   4  10  -1   -0.25    0.46
  -4  -9   1   -0.34    0.57
  -4  -9   1    0.03    0.34
  -4  -9   1   -0.52    0.41
   4   9  -1   -0.28    0.64
   4   9  -1   -0.42    0.53
   4   9  -1   -0.15    0.38
   4   9  -1   -0.35    0.39
   4   9  -1   -0.39    0.44
   4   9  -1   -0.15    0.60
  -4  -8   1   -0.38    0.31
  -4  -8   1   -0.11    0.47
  -4  -8   1   -0.30    0.41
   4   8  -1   -1.32    0.57
   4   8  -1    0.26    0.34
   4   8  -1   -0.64    0.38
   4   8  -1   -0.33    0.56
   4   8  -1    0.05    0.47
   4   8  -1   -0.28    0.38
  -4  -7   1    5.11    0.79
  -4  -7   1    5.51    0.68
  -4  -7   1    4.82    0.77
  -4  -7   1    4.30    0.58
   4   7  -1    3.96    0.66
   4   7  -1    5.97    0.70
   4   7  -1    4.19    0.62
   4   7  -1    5.21    0.72
   4   7  -1    5.75    0.65
   4   7  -1    4.93    0.71
  -4  -6   1   15.23    1.16
  -4  -6   1   16.37    1.24
  -4  -6   1   15.03    1.23
  -4  -6   1   13.26    1.21
  -4  -6   1   13.37    1.36
   4   6  -1   16.13    1.22
   4   6  -1   17.25    1.23
   4   6  -1   15.70    1.37
   4   6  -1   16.17    1.18
   4   6  -1   15.19    1.30
   4   6  -1   14.50    1.31
  -4  -5   1    1.83    0.40
  -4  -5   1    1.53    0.30
  -4  -5   1    1.84    0.32
  -4  -5   1    1.53    0.32
  -4  -5   1    1.30    0.31
   4   5  -1    1.39    0.44
   4   5  -1    1.80    0.31
   4   5  -1    1.15    0.44
   4   5  -1    1.39    0.30
   4   5  -1    1.08    0.37
   4   5  -1    1.35    0.31
   4   5  -1    1.39    0.34
   4   5  -1    0.84    0.31
  -4  -4   1   42.01    3.16
  -4  -4   1   47.49    3.18
  -4  -4   1   46.50    3.19
  -4  -4   1   46.96    3.19
   4   4  -1   45.50    3.15
   4   4  -1   44.48    3.22
   4   4  -1   44.98    3.19
   4   4  -1   45.02    3.22
   4   4  -1   44.51    3.19
   4   4  -1   45.80    3.18
   4   4  -1   47.65    3.17
   4   4  -1   47.02    3.22
  -4  -3   1    3.01    0.38
  -4  -3   1    3.86    0.49
  -4  -3   1    3.06    0.50
  -4  -3   1    2.75    0.38
  -4  -3   1    3.74    0.51
  -4  -3   1    2.99    0.44
  -4  -3   1    3.43    0.49
  -4  -3   1    3.62    0.66
   4   3  -1    3.25    0.47
   4   3  -1    3.25    0.55
   4   3  -1    3.05    0.43
   4   3  -1    2.77    0.34
   4   3  -1    3.28    0.46
   4   3  -1    3.02    0.47
   4   3  -1    3.04    0.36
   4   3  -1    2.47    0.43
  -4  -2   1   14.41    1.03
  -4  -2   1   12.16    1.03
  -4  -2   1   12.98    0.99
  -4  -2   1   14.38    1.04
  -4  -2   1   14.93    1.04
   4   2  -1   14.46    1.02
   4   2  -1   12.74    1.06
   4   2  -1   13.01    1.04
   4   2  -1   14.28    1.09
   4   2  -1   14.09    1.01
   4   2  -1   13.55    1.03
   4   2  -1   14.30    1.10
   4   2  -1   13.29    1.04
  -4  -1   1   18.67    1.37
  -4  -1   1   21.91    1.39
  -4  -1   1   17.01    1.37
  -4  -1   1   20.58    1.40
   4   1  -1   22.71    1.37
   4   1  -1   18.74    1.41
   4   1  -1   18.16    1.36
   4   1  -1   19.21    1.43
   4   1  -1   18.73    1.38
   4   1  -1   18.86    1.43
   4   1  -1   18.76    1.38
  -4   0   1    1.07    0.22
  -4   0   1    0.86    0.22
  -4   0   1    0.77    0.17
  -4   0   1    1.09    0.17
  -4   0   1    0.88    0.18
   4   0  -1    1.11    0.19
   4   0  -1    0.99    0.27
   4   0  -1    0.76    0.30
   4   0  -1    0.75    0.17
   4   0  -1    0.79    0.17
   4   0  -1    1.42    0.30
  -4   1   1   18.38    1.33
  -4   1   1   16.92    1.30
   4  -1  -1   19.60    1.38
   4  -1  -1   19.47    1.32
   4  -1  -1   18.20    1.30
   4  -1  -1   20.45    1.33
   4  -1  -1   18.08    1.36
  -4   2   1   13.45    0.96
  -4   2   1   12.85    1.00
  -4   2   1   13.75    1.03
   4  -2  -1   12.91    0.99
   4  -2  -1   12.94    0.96
   4  -2  -1   13.80    1.09
   4  -2  -1   14.73    0.98
   4  -2  -1   14.56    0.99
   4  -2  -1   14.34    1.06
  -4   3   1   14.82    1.05
  -4   3   1   14.83    1.13
  -4   3   1   15.18    1.11
  -4   3   1   17.01    1.07
  -4   3   1   14.34    1.08
   4  -3  -1   15.40    1.08
   4  -3  -1   15.82    1.05
   4  -3  -1   14.93    1.18
   4  -3  -1   14.54    1.16
   4  -3  -1   15.09    1.12
   4  -3  -1   14.28    1.12
   4  -3  -1   14.88    1.07
  -4   4   1   31.57    2.12
  -4   4   1   27.29    2.07
  -4   4   1   31.97    2.10
  -4   4   1   29.62    2.10
  -4   4   1   30.64    2.16
   4  -4  -1   35.43    2.17
   4  -4  -1   30.09    2.19
   4  -4  -1   30.80    2.10
   4  -4  -1   29.12    2.20
   4  -4  -1   27.46    2.08
   4  -4  -1   31.64    2.10
   4  -4  -1   29.48    2.14
  -4   5   1   10.61    0.81
  -4   5   1   11.66    0.82
  -4   5   1    9.36    0.77
  -4   5   1   12.17    0.84
  -4   5   1   11.81    0.78
  -4   5   1    9.89    0.90
   4  -5  -1    9.64    0.78
   4  -5  -1   11.67    0.98
   4  -5  -1   12.46    0.83
   4  -5  -1   11.31    0.82
   4  -5  -1   10.95    0.80
   4  -5  -1   10.10    1.02
  -4   6   1    0.99    0.20
  -4   6   1    0.79    0.27
  -4   6   1    1.01    0.40
  -4   6   1    0.89    0.27
  -4   6   1    1.37    0.16
  -4   6   1    1.12    0.25
  -4   6   1    1.01    0.15
  -4   6   1    1.18    0.33
   4  -6  -1    1.17    0.39
   4  -6  -1    0.90    0.27
   4  -6  -1    0.34    0.35
   4  -6  -1    0.89    0.17
   4  -6  -1    0.62    0.20
  -4   7   1   55.15    3.77
  -4   7   1   55.33    3.82
  -4   7   1   53.93    3.78
  -4   7   1   58.60    3.85
  -4   7   1   54.98    3.74
  -4   7   1   51.21    3.73
  -4   7   1   54.80    3.88
  -4   7   1   55.10    3.76
   4  -7  -1   56.07    3.78
   4  -7  -1   53.64    3.75
   4  -7  -1   52.13    3.88
   4  -7  -1   56.36    3.76
  -4   8   1    1.34    0.22
  -4   8   1    1.68    0.24
  -4   8   1    1.48    0.28
  -4   8   1    1.41    0.51
  -4   8   1    1.53    0.24
  -4   8   1    1.03    0.41
  -4   8   1    1.11    0.41
  -4   8   1    1.19    0.32
   4  -8  -1    1.76    0.36
   4  -8  -1    1.27    0.46
   4  -8  -1    1.26    0.26
  -4   9   1    6.22    0.63
  -4   9   1    5.17    1.02
  -4   9   1    6.86    0.73
  -4   9   1    5.98    0.99
  -4   9   1    7.83    0.65
  -4   9   1    6.25    0.89
  -4   9   1    7.26    0.65
  -4   9   1    6.83    0.61
   4  -9  -1    7.39    0.71
   4  -9  -1    6.54    1.05
   4  -9  -1    8.09    0.81
  -4  10   1   -1.18    0.65
  -4  10   1   -0.28    0.47
  -4  10   1   -0.23    0.33
  -4  10   1   -0.22    0.37
  -4  10   1   -1.08    0.68
  -4  10   1    0.23    0.27
   4 -10  -1    0.03    0.31
   4 -10  -1   -0.28    0.54
   4 -10  -1   -0.13    0.29
   4 -10  -1    0.68    0.34
   4 -10  -1   -0.04    0.45
  -4  11   1    0.53    0.77
  -4  11   1   -0.06    0.32
  -4  11   1   -0.29    0.32
  -4  11   1   -0.56    0.33
  -4  11   1    0.18    0.52
  -4  11   1    0.39    0.35
  -4  11   1   -0.56    0.67
   4 -11  -1   -0.06    0.50
   4 -11  -1    0.53    0.58
   4 -11  -1   -0.22    0.32
   4 -11  -1    0.07    0.36
  -4  12   1    2.11    0.38
  -4  12   1    2.07    0.66
  -4  12   1    2.98    0.44
  -4  12   1    2.29    0.81
   4 -12  -1    1.97    0.70
   4 -12  -1    1.47    0.41
   4 -12  -1    1.52    0.45
   4 -12  -1    3.04    0.65
  -4  13   1    1.21    0.42
  -4  13   1    1.29    0.81
  -4  13   1    0.98    0.40
   4 -13  -1    0.52    0.73
   4 -13  -1    1.34    0.43
   4 -13  -1    0.28    0.70
   4 -13  -1    0.48    0.71
  -4  14   1    0.67    0.43
  -4  14   1    0.63    0.86
   4 -14  -1    1.00    0.49
   4 -14  -1    0.28    0.73
  -4  15   1   -0.13    0.49
  -4  15   1    0.66    0.91
   4 -15  -1    0.26    0.50
   4 -15  -1   -0.12    0.82
  -4  16   1    1.85    0.62
  -4  16   1    3.23    1.04
   4 -16  -1    1.22    0.60
   4 -16  -1    1.40    0.98
  -3 -15   1    1.02    1.01
   3  15  -1    0.08    0.73
   3  15  -1    0.75    0.93
   3  15  -1    0.40    1.00
  -3 -14   1   -0.18    0.81
   3  14  -1   -0.27    0.85
   3  14  -1   -0.32    0.63
   3  14  -1   -0.43    0.77
  -3 -13   1    0.80    0.80
   3  13  -1    0.05    0.54
   3  13  -1    1.51    0.75
   3  13  -1    0.95    0.71
  -3 -12   1    1.43    0.77
   3  12  -1    1.03    0.73
   3  12  -1    1.93    0.65
   3  12  -1    1.73    0.55
   3  12  -1    1.22    0.82
  -3 -11   1    2.24    0.67
  -3 -11   1    1.36    0.63
   3  11  -1    0.10    0.46
   3  11  -1    1.80    0.52
   3  11  -1    1.80    0.61
   3  11  -1    1.44    0.68
   3  11  -1    1.01    0.73
  -3 -10   1    0.36    0.33
  -3 -10   1   -0.55    0.58
  -3 -10   1    0.08    0.47
   3  10  -1   -0.47    0.66
   3  10  -1    0.11    0.62
   3  10  -1   -1.27    0.62
   3  10  -1   -0.10    0.44
   3  10  -1   -0.75    0.43
   3  10  -1   -0.56    0.50
  -3  -9   1    0.03    0.29
  -3  -9   1   -0.67    0.84
  -3  -9   1    0.11    0.43
  -3  -9   1   -0.36    0.39
   3   9  -1    0.07    0.58
   3   9  -1   -0.32    0.50
   3   9  -1   -0.15    0.35
   3   9  -1   -0.66    0.39
   3   9  -1    0.47    0.47
   3   9  -1   -0.58    0.58
  -3  -8   1    7.48    0.87
  -3  -8   1    8.73    0.72
  -3  -8   1    8.10    0.81
  -3  -8   1    6.98    0.91
   3   8  -1    7.28    1.02
   3   8  -1    6.58    0.97
   3   8  -1    7.98    1.14
   3   8  -1    8.43    0.85
   3   8  -1    8.47    0.91
   3   8  -1    7.70    0.79
  -3  -7   1   -0.55    0.36
  -3  -7   1   -0.19    0.25
  -3  -7   1   -0.04    0.31
  -3  -7   1   -0.16    0.24
  -3  -7   1   -0.50    0.31
   3   7  -1    0.06    0.26
   3   7  -1   -0.18    0.33
   3   7  -1   -0.32    0.45
   3   7  -1    0.10    0.28
   3   7  -1   -0.35    0.43
   3   7  -1   -0.44    0.29
   3   7  -1   -0.47    0.38
  -3  -6   1    4.29    0.60
  -3  -6   1    3.59    0.56
  -3  -6   1    4.22    0.54
  -3  -6   1    4.67    0.55
  -3  -6   1    4.04    0.52
   3   6  -1    3.75    0.66
   3   6  -1    4.89    0.80
   3   6  -1    3.90    0.70
   3   6  -1    4.53    0.58
   3   6  -1    4.00    0.58
   3   6  -1    3.72    0.58
   3   6  -1    4.68    0.69
   3   6  -1    4.16    0.52
  -3  -5   1   18.29    1.29
  -3  -5   1   20.74    1.35
  -3  -5   1   17.42    1.33
  -3  -5   1   18.48    1.32
  -3  -5   1   15.49    1.28
   3   5  -1   15.82    1.31
   3   5  -1   16.62    1.31
   3   5  -1   15.78    1.37
   3   5  -1   17.85    1.32
   3   5  -1   18.37    1.32
   3   5  -1   18.61    1.42
   3   5  -1   17.66    1.56
   3   5  -1   17.22    1.28
  -3  -4   1   63.38    4.47
  -3  -4   1   68.86    4.48
  -3  -4   1   69.50    4.47
  -3  -4   1   64.85    4.48
   3   4  -1   61.62    4.45
   3   4  -1   65.84    4.50
   3   4  -1   66.46    4.47
   3   4  -1   64.01    4.47
   3   4  -1   64.94    4.51
   3   4  -1   64.06    4.48
   3   4  -1   65.40    4.52
   3   4  -1   61.80    4.47
  -3  -3   1    3.52    0.45
  -3  -3   1    4.09    0.45
  -3  -3   1    3.42    0.41
  -3  -3   1    3.02    0.44
  -3  -3   1    4.00    0.54
   3   3  -1    3.70    0.53
   3   3  -1    3.44    0.40
   3   3  -1    3.46    0.54
   3   3  -1    3.55    0.42
   3   3  -1    3.35    0.43
   3   3  -1    3.79    0.45
   3   3  -1    3.04    0.60
   3   3  -1    3.55    0.45
  -3  -2   1   12.36    1.04
  -3  -2   1   13.50    1.01
   3   2  -1   13.98    1.02
   3   2  -1   14.34    1.04
   3   2  -1   15.74    1.07
   3   2  -1   13.41    1.05
   3   2  -1   13.95    1.04
   3   2  -1   14.29    1.02
  -3  -1   1    4.17    0.38
  -3  -1   1    4.09    0.39
  -3  -1   1    3.43    0.45
  -3  -1   1    2.29    0.39
  -3  -1   1    2.83    0.36
   3   1  -1    3.60    0.45
   3   1  -1    2.66    0.38
   3   1  -1    3.09    0.38
   3   1  -1    3.86    0.45
   3   1  -1    3.00    0.37
   3   1  -1    3.78    0.37
  -3   0   1   36.99    2.93
  -3   0   1   43.61    2.93
   3   0  -1   48.53    2.93
   3   0  -1   43.18    2.96
   3   0  -1   39.51    2.97
   3   0  -1   44.08    2.97
   3   0  -1   42.41    2.93
  -3   1   1  122.85    7.23
  -3   1   1  117.44    7.24
  -3   1   1   98.41    7.22
   3  -1  -1  110.05    7.27
   3  -1  -1  110.44    7.27
   3  -1  -1   91.13    7.23
   3  -1  -1   99.68    7.23
   3  -1  -1   89.38    7.25
   3  -1  -1  117.50    7.24
  -3   2   1    0.11    0.21
  -3   2   1    0.07    0.15
  -3   2   1    0.07    0.11
  -3   2   1    0.11    0.19
  -3   2   1    0.07    0.10
  -3   2   1    0.13    0.12
   3  -2  -1    0.11    0.12
   3  -2  -1    0.08    0.12
   3  -2  -1    0.42    0.24
   3  -2  -1    0.07    0.16
   3  -2  -1   -0.02    0.13
   3  -2  -1   -0.25    0.20
  -3   3   1    0.76    0.24
  -3   3   1    0.87    0.20
  -3   3   1    0.67    0.12
  -3   3   1    0.87    0.20
  -3   3   1    0.62    0.10
  -3   3   1    0.61    0.14
   3  -3  -1    0.62    0.10
   3  -3  -1    0.58    0.25
   3  -3  -1    0.54    0.25
   3  -3  -1    0.70    0.14
   3  -3  -1    0.50    0.13
   3  -3  -1    0.56    0.18
  -3   4   1    8.29    1.00
  -3   4   1    9.80    0.73
  -3   4   1   10.43    0.82
  -3   4   1   10.92    0.69
  -3   4   1   10.28    0.73
   3  -4  -1    9.46    0.87
   3  -4  -1    9.32    0.70
   3  -4  -1    9.86    0.84
   3  -4  -1   10.04    0.73
   3  -4  -1    9.66    0.72
  -3   5   1    4.91    0.55
  -3   5   1    5.47    0.37
  -3   5   1    4.96    0.52
  -3   5   1    5.95    0.65
  -3   5   1    4.94    0.43
  -3   5   1    5.36    0.46
  -3   5   1    3.99    0.44
   3  -5  -1    3.67    0.48
   3  -5  -1    3.40    0.45
   3  -5  -1    4.16    0.46
   3  -5  -1    3.63    0.41
  -3   6   1   14.18    1.23
  -3   6   1   15.18    1.26
  -3   6   1   15.40    1.07
  -3   6   1   17.41    1.13
  -3   6   1   14.45    1.11
  -3   6   1   14.40    1.18
   3  -6  -1   14.49    1.12
   3  -6  -1   15.54    1.10
   3  -6  -1   15.67    1.14
  -3   7   1    6.23    0.51
  -3   7   1    6.39    0.57
  -3   7   1    5.99    0.70
  -3   7   1    6.94    0.81
  -3   7   1    5.51    0.57
  -3   7   1    6.13    0.81
  -3   7   1    5.92    0.77
   3  -7  -1    6.35    0.56
   3  -7  -1    5.40    0.86
   3  -7  -1    7.23    0.65
   3  -7  -1    6.11    0.60
  -3   8   1    0.46    0.26
  -3   8   1   -0.21    0.46
  -3   8   1    0.52    0.21
  -3   8   1    0.61    0.37
  -3   8   1    0.06    0.37
  -3   8   1    0.13    0.45
  -3   8   1    0.47    0.20
   3  -8  -1    0.67    0.36
   3  -8  -1    0.61    0.25
   3  -8  -1    0.20    0.38
  -3   9   1    1.76    0.47
  -3   9   1    1.33    0.48
  -3   9   1    1.80    0.33
  -3   9   1    1.96    0.58
  -3   9   1    1.66    0.30
  -3   9   1    1.97    0.59
  -3   9   1    2.64    0.30
   3  -9  -1    1.62    0.49
   3  -9  -1    1.96    0.43
   3  -9  -1    1.62    0.34
  -3  10   1    0.90    0.37
  -3  10   1    0.93    0.33
  -3  10   1    0.84    0.29
  -3  10   1    0.86    0.62
  -3  10   1    0.38    0.50
  -3  10   1    1.05    0.63
  -3  10   1    0.80    0.60
   3 -10  -1    0.55    0.35
   3 -10  -1    0.61    0.51
   3 -10  -1    1.26    0.49
  -3  11   1    0.38    0.55
  -3  11   1    0.39    0.34
  -3  11   1   -0.03    0.64
  -3  11   1    0.48    0.32
  -3  11   1    0.40    0.32
  -3  11   1    0.46    0.62
   3 -11  -1    0.51    0.53
   3 -11  -1    0.30    0.57
   3 -11  -1   -0.06    0.38
  -3  12   1    1.08    0.62
  -3  12   1    0.79    0.36
  -3  12   1    0.26    0.71
  -3  12   1    0.80    0.35
  -3  12   1    0.95    0.36
  -3  12   1   -0.37    0.70
   3 -12  -1    0.97    0.44
   3 -12  -1    0.14    0.59
   3 -12  -1   -0.99    0.59
  -3  13   1    2.26    0.71
  -3  13   1    2.18    0.78
   3 -13  -1    1.98    0.47
   3 -13  -1    2.37    0.55
   3 -13  -1    2.35    0.70
  -3  14   1    0.03    0.45
  -3  14   1    0.52    0.81
  -3  14   1    0.07    0.73
   3 -14  -1    0.05    0.75
   3 -14  -1    0.14    0.47
  -3  15   1    1.13    0.53
  -3  15   1    1.93    0.91
   3 -15  -1    1.13    0.60
   3 -15  -1    1.73    0.88
  -3  16   1    0.46    0.61
  -3  16   1    1.28    1.00
   3 -16  -1   -0.01    0.61
   3 -16  -1   -0.35    0.94
  -2 -15   1   -0.76    0.87
   2  15  -1    0.24    0.89
   2  15  -1   -0.61    0.68
   2  15  -1    0.64    1.01
  -2 -14   1    0.02    0.85
   2  14  -1    0.31    0.75
   2  14  -1    0.43    0.60
   2  14  -1    0.60    0.78
  -2 -13   1    2.66    0.85
   2  13  -1    2.86    0.61
   2  13  -1    3.18    0.81
   2  13  -1    2.82    0.73
  -2 -12   1   -0.68    0.63
   2  12  -1   -0.77    0.47
   2  12  -1    0.07    0.68
   2  12  -1   -0.59    0.58
   2  12  -1   -1.01    0.70
  -2 -11   1    3.84    0.73
   2  11  -1    4.03    0.69
   2  11  -1    3.96    0.57
   2  11  -1    4.83    0.81
   2  11  -1    3.96    0.81
   2  11  -1    2.42    0.85
  -2 -10   1   -0.01    0.46
  -2 -10   1    0.83    0.37
  -2 -10   1   -0.25    0.51
   2  10  -1   -0.77    0.79
   2  10  -1   -0.18    0.59
   2  10  -1    0.04    0.44
   2  10  -1    0.34    1.02
   2  10  -1    0.41    0.63
  -2  -9   1    1.31    0.37
  -2  -9   1    1.04    0.40
  -2  -9   1    1.67    0.32
  -2  -9   1    1.08    0.58
   2   9  -1    1.66    0.60
   2   9  -1    1.71    0.41
   2   9  -1    1.40    0.49
   2   9  -1    0.16    0.53
   2   9  -1    1.86    0.60
  -2  -8   1    1.01    0.34
  -2  -8   1    0.57    0.42
  -2  -8   1    0.76    0.28
   2   8  -1    0.69    0.25
   2   8  -1    0.80    0.46
   2   8  -1    0.65    0.47
   2   8  -1    0.73    0.51
   2   8  -1    1.34    0.35
   2   8  -1    1.58    0.42
  -2  -7   1    2.39    0.48
  -2  -7   1    2.43    0.36
  -2  -7   1    2.86    0.50
  -2  -7   1    2.08    0.37
  -2  -7   1    2.63    0.35
   2   7  -1    1.51    0.45
   2   7  -1    2.86    0.49
   2   7  -1    2.84    0.33
   2   7  -1    1.90    0.34
   2   7  -1    2.72    0.42
   2   7  -1    2.92    0.53
  -2  -6   1    0.43    0.23
  -2  -6   1    0.02    0.26
  -2  -6   1   -0.01    0.24
  -2  -6   1   -0.09    0.35
   2   6  -1    0.37    0.26
   2   6  -1    0.35    0.24
   2   6  -1   -0.27    0.33
   2   6  -1   -0.12    0.30
   2   6  -1    0.12    0.39
   2   6  -1   -0.06    0.36
  -2  -5   1   17.39    1.25
  -2  -5   1   17.74    1.26
  -2  -5   1   15.92    1.23
   2   5  -1   16.76    1.22
   2   5  -1   17.26    1.33
   2   5  -1   16.81    1.27
   2   5  -1   15.85    1.24
   2   5  -1   15.48    1.36
   2   5  -1   15.45    1.27
   2   5  -1   18.02    1.29
   2   5  -1   17.77    1.24
  -2  -4   1  196.33   11.57
  -2  -4   1  184.06   11.58
  -2  -4   1  165.41   11.58
  -2  -4   1  156.02   11.58
   2   4  -1  179.78   11.59
   2   4  -1  174.68   11.59
   2   4  -1  166.31   11.58
   2   4  -1  161.41   11.56
   2   4  -1  163.68   11.58
   2   4  -1  174.29   11.62
   2   4  -1  168.06   11.61
   2   4  -1  151.90   11.56
  -2  -3   1   16.88    1.46
  -2  -3   1   20.67    1.42
  -2  -3   1   23.41    1.43
   2   3  -1   17.70    1.40
   2   3  -1   22.49    1.43
   2   3  -1   20.96    1.42
   2   3  -1   19.07    1.42
   2   3  -1   18.35    1.41
   2   3  -1   21.02    1.47
   2   3  -1   18.22    1.43
   2   3  -1   21.33    1.46
  -2  -2   1   27.17    1.73
   2   2  -1   25.74    1.73
   2   2  -1   24.75    1.72
   2   2  -1   22.29    1.72
   2   2  -1   23.28    1.75
   2   2  -1   25.21    1.76
  -2  -1   1   32.52    2.55
  -2  -1   1   43.18    2.55
  -2  -1   1   36.37    2.56
   2   1  -1   38.21    2.55
   2   1  -1   38.76    2.56
   2   1  -1   34.18    2.54
   2   1  -1   39.68    2.55
   2   1  -1   33.24    2.58
  -2   0   1   71.99    4.88
  -2   0   1   79.57    4.89
   2   0  -1   65.01    4.88
   2   0  -1   70.46    4.89
  -2   1   1   16.63    1.05
  -2   1   1   12.45    1.06
  -2   1   1   16.75    1.11
   2  -1  -1   16.11    1.05
   2  -1  -1   16.17    1.10
   2  -1  -1   14.42    1.05
   2  -1  -1   12.74    1.07
  -2   2   1   30.72    2.09
  -2   2   1   28.30    2.08
  -2   2   1   35.73    2.15
   2  -2  -1   28.01    2.13
   2  -2  -1   29.69    2.09
   2  -2  -1   29.46    2.09
  -2   3   1    6.05    0.55
  -2   3   1    4.45    0.43
  -2   3   1    6.02    0.44
  -2   3   1    6.32    0.50
  -2   3   1    3.77    0.52
   2  -3  -1    5.98    0.55
   2  -3  -1    4.40    0.44
  -2   4   1    9.20    0.73
  -2   4   1    6.57    0.63
  -2   4   1    8.24    0.60
  -2   4   1    8.05    0.70
  -2   4   1    7.68    0.72
   2  -4  -1    8.42    0.64
   2  -4  -1    7.88    0.61
   2  -4  -1    7.35    0.59
  -2   5   1    0.35    0.25
  -2   5   1    0.69    0.13
  -2   5   1    0.36    0.20
  -2   5   1    0.15    0.27
  -2   5   1    0.28    0.34
  -2   5   1    0.17    0.18
  -2   5   1    0.49    0.16
  -2   5   1    0.13    0.33
   2  -5  -1    0.04    0.27
   2  -5  -1    0.84    0.24
   2  -5  -1    0.49    0.16
   2  -5  -1    0.31    0.18
  -2   6   1   58.89    3.96
  -2   6   1   57.57    4.02
  -2   6   1   59.28    4.07
  -2   6   1   56.01    3.97
  -2   6   1   60.45    4.04
  -2   6   1   53.09    4.11
  -2   6   1   53.13    3.97
  -2   6   1   58.76    3.98
   2  -6  -1   61.73    4.00
   2  -6  -1   60.06    4.06
   2  -6  -1   58.95    3.97
  -2   7   1    6.65    0.58
  -2   7   1    6.77    0.59
  -2   7   1    5.93    0.71
  -2   7   1    5.38    0.81
  -2   7   1    5.94    0.55
  -2   7   1    7.17    0.83
  -2   7   1    6.09    0.77
   2  -7  -1    7.41    0.84
   2  -7  -1    7.30    0.65
   2  -7  -1    6.26    0.59
  -2   8   1    7.20    0.62
  -2   8   1    6.81    0.86
  -2   8   1    6.60    0.80
  -2   8   1    7.30    0.94
  -2   8   1    7.44    0.62
  -2   8   1    7.39    0.66
  -2   8   1    5.82    0.93
   2  -8  -1    7.56    0.90
   2  -8  -1    8.73    0.75
  -2   9   1   13.49    1.04
  -2   9   1   13.04    1.36
  -2   9   1   14.07    1.08
  -2   9   1   12.50    1.21
  -2   9   1   13.85    1.28
  -2   9   1   13.19    1.04
  -2   9   1   12.35    1.30
   2  -9  -1   14.48    1.12
   2  -9  -1   14.19    1.16
   2  -9  -1   14.42    1.30
  -2  10   1    5.07    0.83
  -2  10   1    4.70    0.77
  -2  10   1    5.75    0.59
  -2  10   1    5.18    0.68
  -2  10   1    6.45    1.09
  -2  10   1    4.90    0.58
  -2  10   1    5.84    0.82
   2 -10  -1    5.10    1.06
   2 -10  -1    6.99    0.89
   2 -10  -1    5.18    0.77
  -2  11   1    0.32    0.35
  -2  11   1   -0.39    0.64
  -2  11   1    0.27    0.33
  -2  11   1   -0.08    0.27
  -2  11   1   -0.17    0.61
  -2  11   1    0.10    0.53
   2 -11  -1   -0.48    0.41
   2 -11  -1    0.76    0.72
  -2  12   1    0.69    0.71
  -2  12   1    0.74    0.28
  -2  12   1    0.81    0.59
  -2  12   1    0.75    0.36
  -2  12   1    1.55    0.72
   2 -12  -1    0.71    0.49
   2 -12  -1   -0.33    0.58
   2 -12  -1    1.34    0.62
  -2  13   1    8.81    1.29
  -2  13   1    9.52    1.32
  -2  13   1    9.63    0.97
   2 -13  -1   10.73    1.22
  -2  14   1   -0.88    0.70
  -2  14   1   -0.68    0.45
  -2  14   1    0.21    0.78
   2 -14  -1   -0.21    0.76
   2 -14  -1    0.33    0.48
  -2  15   1    2.14    0.85
  -2  15   1    2.34    0.60
  -2  15   1    3.80    0.97
   2 -15  -1    1.78    0.59
   2 -15  -1    2.63    0.96
  -2  16   1   -0.77    0.89
  -2  16   1   -0.25    0.63
   2 -16  -1   -0.50    0.94
   2 -16  -1   -0.84    0.66
  -1 -16   1    0.13    1.01
   1  16  -1    1.25    1.02
   1  16  -1    0.31    0.70
   1  16  -1    2.13    1.05
  -1 -15   1   -0.03    0.89
   1  15  -1   -0.20    0.97
   1  15  -1    0.81    0.83
   1  15  -1    0.77    0.63
  -1 -14   1    2.76    0.85
   1  14  -1    1.34    0.84
   1  14  -1    1.86    0.77
   1  14  -1    1.16    0.57
  -1 -13   1    1.73    0.74
   1  13  -1    1.26    0.72
   1  13  -1    1.95    0.73
   1  13  -1    2.29    0.54
  -1 -12   1    0.34    0.75
  -1 -12   1    1.77    0.69
  -1 -12   1    0.32    0.48
   1  12  -1    0.86    0.75
   1  12  -1    0.36    0.62
   1  12  -1    1.68    0.49
   1  12  -1    1.29    0.41
   1  12  -1    1.62    0.69
  -1 -11   1    0.47    0.61
  -1 -11   1   -0.31    0.42
   1  11  -1    0.12    0.54
   1  11  -1    0.29    0.57
   1  11  -1    0.62    0.36
   1  11  -1    0.63    0.63
   1  11  -1    0.28    0.42
  -1 -10   1    0.35    0.62
   1  10  -1   -0.54    0.55
   1  10  -1    0.76    0.60
   1  10  -1    0.23    0.78
   1  10  -1    0.22    0.33
   1  10  -1    0.13    0.57
  -1  -9   1    0.16    0.50
  -1  -9   1    0.71    0.40
  -1  -9   1    0.61    0.50
   1   9  -1    0.80    0.46
   1   9  -1    1.35    0.45
   1   9  -1    0.10    0.50
   1   9  -1    0.86    0.57
   1   9  -1    1.53    0.36
   1   9  -1    1.19    0.32
   1   9  -1    0.20    0.50
  -1  -8   1    0.36    0.42
  -1  -8   1    0.16    0.43
  -1  -8   1    0.76    0.27
   1   8  -1    0.97    0.45
   1   8  -1    0.47    0.50
   1   8  -1    0.67    0.30
   1   8  -1    0.50    0.37
   1   8  -1    0.34    0.37
  -1  -7   1   -0.48    0.25
  -1  -7   1    0.15    0.22
  -1  -7   1   -0.06    0.22
   1   7  -1    0.23    0.38
   1   7  -1    0.13    0.42
   1   7  -1    0.10    0.23
   1   7  -1   -0.07    0.32
  -1  -6   1    0.63    0.25
  -1  -6   1    0.71    0.22
  -1  -6   1    0.84    0.22
   1   6  -1    0.33    0.33
   1   6  -1    1.03    0.23
   1   6  -1    0.45    0.31
   1   6  -1    0.48    0.22
   1   6  -1    0.63    0.22
   1   6  -1    0.49    0.40
  -1  -5   1   77.68    5.14
  -1  -5   1   75.33    5.14
  -1  -5   1   75.10    5.13
   1   5  -1   70.21    5.14
   1   5  -1   72.49    5.12
   1   5  -1   75.01    5.19
   1   5  -1   79.27    5.16
   1   5  -1   77.22    5.16
   1   5  -1   73.39    5.21
  -1  -4   1  283.32   18.86
  -1  -4   1  247.25   18.85
  -1  -4   1  269.88   18.86
   1   4  -1  294.08   18.85
   1   4  -1  267.85   18.87
   1   4  -1  287.56   18.90
   1   4  -1  262.94   18.85
   1   4  -1  289.49   18.89
   1   4  -1  297.49   18.87
  -1  -3   1  484.51   32.14
   1   3  -1  421.17   32.12
   1   3  -1  509.10   32.16
   1   3  -1  499.07   32.16
   1   3  -1  454.92   32.14
  -1  -1   1   43.14    2.90
  -1  -1   1   43.95    2.92
   1   1  -1   40.22    2.90
   1   1  -1   42.64    2.90
   1  -1  -1  121.60    7.48
   1  -1  -1   98.28    7.46
  -1   2   1  132.89    9.10
   1  -2  -1  140.23    9.08
   1  -2  -1  126.24    9.07
   1  -2  -1  135.36    9.10
  -1   3   1   45.56    3.04
   1  -3  -1   45.22    2.99
   1  -3  -1   40.39    3.04
  -1   4   1   17.28    1.27
  -1   4   1   19.90    1.30
  -1   4   1   19.50    1.36
  -1   4   1   15.03    1.33
  -1   4   1   16.67    1.27
  -1   4   1   20.66    1.25
  -1   4   1   18.53    1.33
   1  -4  -1   15.90    1.28
   1  -4  -1   20.77    1.27
   1  -4  -1   15.53    1.33
  -1   5   1    3.13    0.44
  -1   5   1    2.84    0.37
  -1   5   1    3.04    0.45
  -1   5   1    3.34    0.39
  -1   5   1    3.97    0.33
  -1   5   1    2.87    0.61
  -1   5   1    3.18    0.40
   1  -5  -1    3.15    0.42
   1  -5  -1    3.64    0.39
  -1   6   1   67.37    4.74
  -1   6   1   68.16    4.64
  -1   6   1   69.20    4.70
  -1   6   1   58.95    4.65
  -1   6   1   69.99    4.66
  -1   6   1   65.63    4.69
   1  -6  -1   74.25    4.73
   1  -6  -1   70.73    4.68
   1  -6  -1   67.55    4.66
  -1   7   1   -0.01    0.22
  -1   7   1   -0.19    0.21
  -1   7   1   -0.24    0.32
  -1   7   1   -0.38    0.19
  -1   7   1   -0.64    0.34
   1  -7  -1   -0.46    0.32
   1  -7  -1   -0.18    0.31
   1  -7  -1   -0.22    0.20
  -1   8   1   12.01    1.16
  -1   8   1   11.89    1.10
  -1   8   1   13.05    0.94
  -1   8   1   13.19    1.00
  -1   8   1   12.04    1.14
  -1   8   1   12.68    1.22
  -1   8   1   12.34    0.96
   1  -8  -1   12.92    1.03
   1  -8  -1   12.54    1.06
   1  -8  -1   13.06    1.19
  -1   9   1   -1.00    0.53
  -1   9   1    0.63    0.24
  -1   9   1    0.37    0.44
  -1   9   1   -0.23    0.42
  -1   9   1    0.00    0.50
  -1   9   1    0.02    0.29
  -1   9   1    0.38    0.29
   1  -9  -1    0.74    0.41
   1  -9  -1   -0.19    0.34
   1  -9  -1   -0.04    0.44
  -1  10   1    0.80    0.60
  -1  10   1    0.19    0.59
  -1  10   1    0.97    0.33
  -1  10   1    0.72    0.53
  -1  10   1    1.36    0.63
   1 -10  -1    1.21    0.52
   1 -10  -1    0.67    0.49
   1 -10  -1    0.66    0.40
  -1  11   1    9.41    0.81
  -1  11   1    8.40    0.85
  -1  11   1    6.24    1.05
  -1  11   1    7.43    1.18
  -1  11   1    8.93    1.14
   1 -11  -1    5.35    1.14
   1 -11  -1    6.69    0.98
   1 -11  -1    8.69    1.01
  -1  12   1   19.23    1.49
  -1  12   1   16.07    1.66
  -1  12   1   19.37    1.72
  -1  12   1   15.89    1.80
  -1  12   1   22.52    1.47
   1 -12  -1   20.67    1.64
   1 -12  -1   18.49    1.60
   1 -12  -1   15.42    1.70
  -1  13   1    3.94    0.83
  -1  13   1    6.45    0.82
  -1  13   1    5.02    0.91
   1 -13  -1    6.13    0.89
  -1  14   1    5.30    0.92
  -1  14   1    4.35    0.62
  -1  14   1    3.99    0.90
   1 -14  -1    4.09    0.92
  -1  15   1    2.37    0.95
  -1  15   1    1.37    0.85
  -1  15   1    0.51    0.59
   1 -15  -1    1.77    0.60
   1 -15  -1    1.59    0.91
  -1  16   1   -0.42    0.65
  -1  16   1    2.01    1.03
   1 -16  -1    0.11    0.69
   1 -16  -1    0.32    0.93
   0 -16   1    4.17    1.12
   0  16  -1    2.08    0.98
   0  16  -1    5.48    1.09
   0  16  -1    2.76    0.72
   0 -15   1    0.75    0.89
   0  15  -1    0.41    0.85
   0  15  -1   -0.84    0.81
   0  15  -1   -0.61    0.58
   0 -14   1    1.73    0.83
   0  14  -1    1.62    0.82
   0  14  -1    1.06    0.79
   0  14  -1    1.02    0.54
   0 -13   1    1.59    0.73
   0  13  -1    0.78    0.48
   0  13  -1    1.57    0.71
   0  13  -1    1.88    0.75
   0 -12   1    0.82    0.46
   0 -12   1    0.01    0.51
   0 -12   1    1.50    0.65
   0  12  -1    1.29    0.62
   0  12  -1    1.65    0.74
   0  12  -1    1.59    0.75
   0  12  -1    2.42    0.48
   0  12  -1    1.10    0.40
   0 -11   1   -0.67    0.38
   0 -11   1   -0.91    0.44
   0 -11   1   -0.29    0.58
   0  11  -1   -0.49    0.52
   0  11  -1    0.22    0.33
   0  11  -1   -0.06    0.60
   0  11  -1    0.04    0.39
   0  11  -1    0.09    0.58
   0 -10   1    4.08    0.67
   0 -10   1    2.64    0.46
   0  10  -1    4.68    0.64
   0  10  -1    4.10    0.65
   0  10  -1    3.68    0.64
   0  10  -1    3.34    0.68
   0  10  -1    2.00    0.62
   0  -9   1   16.03    1.36
   0  -9   1   17.58    1.41
   0   9  -1   17.38    1.45
   0   9  -1   17.18    1.61
   0   9  -1   17.07    1.44
   0   9  -1   18.27    1.34
   0   9  -1   18.27    1.30
   0   9  -1   16.25    1.51
   0  -8   1   -0.69    0.28
   0  -8   1   -0.06    0.31
   0  -8   1    0.69    0.40
   0   8  -1   -0.77    0.35
   0   8  -1    0.03    0.24
   0   8  -1   -0.34    0.38
   0   8  -1    0.46    0.26
   0   8  -1   -0.37    0.38
   0   8  -1   -0.01    0.23
   0   8  -1   -0.31    0.44
   0  -7   1    9.55    0.87
   0  -7   1   11.39    0.84
   0  -7   1   11.50    0.91
   0   7  -1    9.42    0.92
   0   7  -1   11.63    0.84
   0   7  -1   10.54    0.80
   0   7  -1   11.08    0.93
   0   7  -1    8.30    1.08
   0   7  -1    8.58    1.04
   0  -6   1    0.73    0.20
   0  -6   1    0.95    0.26
   0  -6   1    0.39    0.23
   0  -6   1    0.41    0.34
   0   6  -1    0.74    0.23
   0   6  -1    0.44    0.20
   0   6  -1    0.10    0.30
   0   6  -1   -0.61    0.50
   0   6  -1    0.56    0.20
   0   6  -1   -0.10    0.33
   0   6  -1    0.59    0.20
   0   6  -1    0.36    0.34
   0  -5   1   22.24    1.65
   0  -5   1   22.43    1.62
   0  -5   1   25.37    1.65
   0  -5   1   23.49    1.62
   0   5  -1   21.78    1.61
   0   5  -1   22.59    1.62
   0   5  -1   22.19    1.60
   0   5  -1   22.12    1.70
   0   5  -1   22.10    1.74
   0   5  -1   22.77    1.66
   0   5  -1   24.55    1.64
   0   5  -1   23.73    1.66
   0  -4   1   60.56    3.76
   0  -4   1   54.22    3.71
   0  -4   1   53.92    3.70
   0  -4   1   54.37    3.70
   0   4  -1   52.08    3.70
   0   4  -1   51.37    3.69
   0   4  -1   50.54    3.71
   0   4  -1   53.61    3.74
   0   4  -1   60.21    3.72
   0   4  -1   54.73    3.76
   0   4  -1   53.74    3.70
   0   4  -1   49.59    3.68
   0   2  -1  289.63   21.39
   0   2  -1  340.56   21.39
   0   2   1   -0.04    0.12
   0   2   1   -0.01    0.06
   0   2   1   -0.07    0.18
   0  -2  -1   -0.07    0.18
   0  -2  -1    0.22    0.20
   0  -2  -1   -0.02    0.13
   0  -2  -1   -0.01    0.14
   0   3   1   35.22    2.24
   0   3   1   36.48    2.17
   0   3   1   28.61    2.20
   0   3   1   27.70    2.16
   0   3   1   29.65    2.21
   0  -3  -1   31.33    2.23
   0   4   1   31.68    2.21
   0   4   1   33.61    2.18
   0   4   1   33.74    2.15
   0   4   1   27.00    2.15
   0   4   1   30.27    2.13
   0   4   1   29.47    2.17
   0  -4  -1   29.59    2.18
   0   5   1   22.59    1.71
   0   5   1   22.95    1.76
   0   5   1   24.82    1.75
   0   5   1   23.97    1.78
   0   5   1   20.56    1.81
   0   5   1   25.15    1.79
   0   5   1   26.06    1.70
   0  -5  -1   26.32    1.72
   0  -5  -1   26.29    1.74
   0  -5  -1   25.03    1.79
   0   6   1    4.84    0.47
   0   6   1    4.24    0.51
   0   6   1    4.58    0.58
   0   6   1    2.88    0.75
   0   6   1    4.09    0.62
   0  -6  -1    5.32    0.74
   0  -6  -1    5.33    0.51
   0  -6  -1    5.59    0.58
   0   7   1   -0.06    0.22
   0   7   1    0.05    0.39
   0   7   1   -0.29    0.35
   0   7   1   -0.38    0.30
   0   7   1    0.41    0.23
   0   7   1   -0.58    0.33
   0  -7  -1   -0.04    0.22
   0  -7  -1   -0.35    0.47
   0  -7  -1    0.70    0.34
   0  -7  -1    0.79    0.35
   0   8   1    7.24    0.90
   0   8   1    6.63    0.66
   0   8   1    7.58    0.71
   0   8   1    7.45    0.79
   0   8   1    7.52    0.83
   0   8   1    6.54    0.97
   0  -8  -1    8.11    0.80
   0  -8  -1    5.99    0.76
   0  -8  -1    7.18    0.88
   0   9   1    4.22    0.44
   0   9   1    3.30    0.60
   0   9   1    3.92    0.66
   0   9   1    3.40    0.44
   0   9   1    3.51    0.56
   0   9   1    3.58    0.64
   0  -9  -1    4.90    0.73
   0  -9  -1    3.02    0.48
   0  -9  -1    3.40    0.53
   0  10   1    0.31    0.35
   0  10   1   -0.54    0.51
   0  10   1    0.10    0.56
   0  10   1    0.30    0.64
   0 -10  -1   -0.43    0.45
   0 -10  -1    0.28    0.52
   0 -10  -1   -0.51    0.43
   0  11   1    3.21    0.68
   0  11   1    3.24    0.76
   0  11   1    3.09    0.49
   0  11   1    4.47    0.70
   0  11   1    3.75    0.75
   0 -11  -1    4.75    0.71
   0 -11  -1    2.27    0.57
   0  12   1   10.40    0.98
   0  12   1    8.39    1.35
   0  12   1   10.12    1.26
   0  12   1    6.83    1.18
   0  12   1    9.53    0.99
   0 -12  -1   10.94    1.22
   0  13   1    0.64    0.48
   0  13   1    1.10    0.79
   0  13   1    0.35    0.66
   0 -13  -1    0.68    0.75
   0  14   1    7.31    1.04
   0  14   1    7.00    1.04
   0  14   1    7.55    0.99
   0 -14  -1    5.97    1.05
   0 -14  -1    7.27    0.98
   0  15   1   -0.26    0.58
   0  15   1    0.11    0.85
   0  15   1    0.31    0.88
   0 -15  -1    0.82    0.88
   0 -15  -1    0.54    0.61
   0  16   1    1.82    0.80
   0  16   1    4.22    1.10
   0 -16  -1    4.53    1.12
   0 -16  -1    4.39    0.81
   1 -16   1    0.33    1.00
  -1  16  -1    2.80    1.09
  -1  16  -1   -0.20    0.92
  -1  16  -1    0.51    0.61
   1 -15   1   -0.03    0.84
  -1  15  -1   -0.02    0.89
  -1  15  -1    0.33    0.54
  -1  15  -1   -0.22    0.80
   1 -14   1    6.92    1.01
  -1  14  -1    6.09    1.02
  -1  14  -1    8.69    0.96
  -1  14  -1    7.85    1.31
   1 -13   1   -0.36    0.65
  -1  13  -1   -0.18    0.63
  -1  13  -1   -0.16    0.71
  -1  13  -1   -0.45    0.43
   1 -12   1    5.05    0.68
   1 -12   1    6.89    0.89
  -1  12  -1    7.52    0.77
  -1  12  -1    5.98    1.19
  -1  12  -1    5.78    0.85
  -1  12  -1    7.78    0.97
  -1  12  -1    7.81    0.84
   1 -11   1   -0.76    0.44
   1 -11   1    0.13    0.56
   1 -11   1    0.06    0.41
  -1  11  -1    0.82    0.67
  -1  11  -1    0.11    0.62
  -1  11  -1    0.40    0.35
  -1  11  -1   -0.32    0.53
  -1  11  -1    0.40    0.32
   1 -10   1    0.45    0.37
   1 -10   1    1.76    0.53
   1 -10   1    1.00    0.44
  -1  10  -1    1.04    0.32
  -1  10  -1    0.73    0.59
  -1  10  -1    1.32    0.36
  -1  10  -1    1.12    0.51
  -1  10  -1    1.74    0.67
  -1  10  -1    0.87    0.53
   1  -9   1    2.31    0.44
   1  -9   1    3.94    0.56
  -1   9  -1    2.07    0.51
  -1   9  -1    2.72    0.59
  -1   9  -1    2.99    0.35
  -1   9  -1    3.24    0.52
  -1   9  -1    2.48    0.34
  -1   9  -1    2.49    0.59
   1  -8   1   18.82    1.38
   1  -8   1   19.26    1.42
   1  -8   1   20.37    1.45
  -1   8  -1   17.36    1.44
  -1   8  -1   18.27    1.46
  -1   8  -1   18.64    1.57
  -1   8  -1   17.16    1.32
  -1   8  -1   16.18    1.49
  -1   8  -1   18.90    1.34
   1  -7   1    1.52    0.38
   1  -7   1    1.36    0.22
   1  -7   1    2.27    0.38
  -1   7  -1    1.60    0.22
  -1   7  -1    1.71    0.23
  -1   7  -1    1.59    0.43
  -1   7  -1    1.05    0.35
  -1   7  -1    1.48    0.40
  -1   7  -1    1.49    0.30
  -1   7  -1    0.62    0.43
   1  -6   1   45.92    2.97
   1  -6   1   42.36    2.93
   1  -6   1   45.68    2.96
   1  -6   1   42.44    2.92
  -1   6  -1   41.59    2.97
  -1   6  -1   38.27    2.92
  -1   6  -1   40.72    2.90
  -1   6  -1   42.01    2.92
  -1   6  -1   43.51    2.96
  -1   6  -1   41.48    3.04
  -1   6  -1   42.84    2.98
   1  -5   1    5.65    0.59
   1  -5   1    5.00    0.54
   1  -5   1    6.11    0.47
   1  -5   1    5.24    0.49
  -1   5  -1    5.39    0.46
  -1   5  -1    5.81    0.46
  -1   5  -1    4.17    0.59
  -1   5  -1    5.01    0.70
  -1   5  -1    5.30    0.57
  -1   5  -1    5.80    0.55
  -1   5  -1    4.44    0.65
  -1   5  -1    5.65    0.43
   1  -4   1   18.29    1.40
   1  -4   1   20.32    1.36
   1  -4   1   21.15    1.36
  -1   4  -1   18.79    1.34
  -1   4  -1   21.36    1.44
  -1   4  -1   18.96    1.36
  -1   4  -1   21.10    1.40
  -1   4  -1   18.20    1.39
  -1   4  -1   18.14    1.35
   1  -3   1   27.46    1.95
   1  -3   1   27.44    1.87
   1  -3   1   29.49    1.87
  -1   3  -1   30.97    1.96
  -1   3  -1   27.44    1.93
  -1   3  -1   28.23    1.95
  -1   3  -1   23.27    1.87
  -1   3  -1   24.51    1.87
   1  -2   1  418.30   27.62
  -1   2  -1  395.80   27.63
   1  -1   1   37.35    2.60
   1  -1   1   39.20    2.61
   1   0   1   23.77    1.63
   1   1   1   13.33    0.95
   1   1   1   13.63    0.95
  -1  -1  -1   13.43    0.98
  -1  -1  -1   14.22    0.96
  -1  -1  -1   13.50    1.00
   1   2   1    1.92    0.22
   1   2   1    1.17    0.27
   1   2   1    1.53    0.30
   1   2   1    2.40    0.33
  -1  -2  -1    2.56    0.36
  -1  -2  -1    1.27    0.29
   1   3   1    1.03    0.26
   1   3   1    0.97    0.17
   1   3   1    0.79    0.21
   1   3   1    0.55    0.16
   1   3   1    0.71    0.19
   1   3   1    0.49    0.24
   1   3   1    0.96    0.21
  -1  -3  -1    1.05    0.21
  -1  -3  -1    1.00    0.18
  -1  -3  -1    1.01    0.19
  -1  -3  -1    0.95    0.23
   1   4   1   -0.04    0.17
   1   4   1    0.02    0.16
   1   4   1   -0.09    0.20
   1   4   1    0.04    0.25
   1   4   1   -0.13    0.29
   1   4   1    0.10    0.22
   1   4   1    0.07    0.27
  -1  -4  -1   -0.04    0.18
  -1  -4  -1    0.07    0.17
  -1  -4  -1    0.41    0.22
  -1  -4  -1   -0.18    0.21
   1   5   1   39.08    2.82
   1   5   1   41.91    2.87
   1   5   1   36.10    2.89
   1   5   1   39.49    2.84
   1   5   1   44.19    2.83
   1   5   1   39.49    2.79
   1   5   1   40.88    2.82
   1   5   1   42.93    2.86
  -1  -5  -1   41.31    2.82
  -1  -5  -1   34.68    2.82
  -1  -5  -1   42.46    2.85
  -1  -5  -1   44.07    2.82
   1   6   1    5.90    0.61
   1   6   1    6.61    0.83
   1   6   1    6.48    0.67
   1   6   1    6.42    0.74
   1   6   1    7.16    0.60
   1   6   1    7.26    0.70
  -1  -6  -1    8.09    0.79
  -1  -6  -1    7.41    0.70
  -1  -6  -1    7.20    0.66
  -1  -6  -1    6.46    0.66
   1   7   1   10.14    0.86
   1   7   1    9.94    0.95
   1   7   1   11.76    1.03
   1   7   1   10.78    0.96
  -1  -7  -1   11.51    0.91
  -1  -7  -1   10.82    0.98
  -1  -7  -1   11.51    0.96
   1   8   1    7.96    0.84
   1   8   1    8.37    0.72
   1   8   1    7.74    0.91
   1   8   1    5.62    1.06
   1   8   1    8.40    0.95
  -1  -8  -1    9.45    0.87
  -1  -8  -1    7.79    0.89
   1   9   1    2.39    0.39
   1   9   1    1.46    0.57
   1   9   1    1.33    0.54
   1   9   1    1.93    0.49
   1   9   1    2.67    0.60
  -1  -9  -1    1.52    0.45
  -1  -9  -1    2.89    0.57
   1  10   1    2.61    0.71
   1  10   1    5.31    0.99
   1  10   1    3.58    0.68
   1  10   1    4.77    0.96
   1  10   1    5.39    0.77
  -1 -10  -1    5.88    0.81
  -1 -10  -1    3.66    0.57
   1  11   1    3.97    0.52
   1  11   1    4.34    0.79
   1  11   1    3.70    0.77
   1  11   1    2.82    0.49
   1  11   1    3.65    0.67
  -1 -11  -1    3.79    0.70
  -1 -11  -1    1.54    0.60
  -1 -11  -1    2.37    0.57
   1  12   1    3.04    0.71
   1  12   1    3.59    0.77
   1  12   1    3.72    0.84
   1  12   1    3.90    0.58
  -1 -12  -1    4.71    0.82
   1  13   1    0.87    0.52
   1  13   1    0.85    0.67
   1  13   1   -0.52    0.75
  -1 -13  -1    0.79    0.70
   1  14   1    1.08    0.58
   1  14   1    1.17    0.93
   1  14   1    1.60    0.78
  -1 -14  -1    0.52    0.59
  -1 -14  -1    1.08    0.82
   1  15   1    0.24    0.64
   1  15   1    1.00    0.93
   1  15   1   -0.26    0.82
  -1 -15  -1    0.16    0.63
  -1 -15  -1   -0.85    0.89
   1  16   1    5.19    0.97
   1  16   1    5.66    1.12
   1  16   1    6.07    1.20
  -1 -16  -1    4.89    0.87
  -1 -16  -1    6.47    1.24
   2 -16   1   -0.44    0.91
  -2  16  -1   -0.77    0.56
  -2  16  -1    0.35    0.93
  -2  16  -1    0.96    0.94
   2 -15   1    0.29    0.81
  -2  15  -1   -0.32    0.51
  -2  15  -1   -0.14    0.80
  -2  15  -1    0.39    0.91
   2 -14   1    2.00    0.78
  -2  14  -1    0.81    0.68
  -2  14  -1    1.71    0.83
  -2  14  -1    1.00    0.46
   2 -13   1   -0.05    0.67
   2 -13   1   -0.27    0.49
  -2  13  -1    0.50    0.75
  -2  13  -1   -0.73    0.39
  -2  13  -1   -0.37    0.89
  -2  13  -1   -0.24    0.64
   2 -12   1    1.86    0.46
   2 -12   1    3.04    0.69
  -2  12  -1    3.19    0.82
  -2  12  -1    1.51    0.72
  -2  12  -1    2.01    0.41
  -2  12  -1    2.37    0.62
   2 -11   1    8.16    0.90
   2 -11   1    7.72    1.11
  -2  11  -1    7.97    1.16
  -2  11  -1    7.42    0.78
  -2  11  -1    8.29    0.79
  -2  11  -1    9.80    0.84
  -2  11  -1   12.75    1.58
  -2  11  -1    8.25    1.05
   2 -10   1    1.39    0.37
   2 -10   1    1.71    0.47
   2 -10   1    1.87    0.54
  -2  10  -1    1.84    0.31
  -2  10  -1    2.03    0.34
  -2  10  -1    1.48    0.60
  -2  10  -1    1.86    0.55
  -2  10  -1    1.88    0.52
  -2  10  -1    1.75    0.62
   2  -9   1    7.92    0.76
   2  -9   1    6.35    0.74
   2  -9   1    9.71    0.93
   2  -9   1    9.09    0.86
  -2   9  -1    8.36    0.68
  -2   9  -1    8.37    0.73
  -2   9  -1    8.93    0.69
  -2   9  -1    7.73    1.11
  -2   9  -1    6.82    0.99
  -2   9  -1    6.90    0.88
  -2   9  -1    6.55    0.97
   2  -8   1   15.99    1.14
   2  -8   1   17.10    1.29
   2  -8   1   14.52    1.21
   2  -8   1   13.86    1.15
   2  -8   1   15.23    1.15
  -2   8  -1   15.74    1.13
  -2   8  -1   14.70    1.10
  -2   8  -1   14.28    1.32
  -2   8  -1   15.85    1.26
  -2   8  -1   14.87    1.40
  -2   8  -1   15.89    1.29
  -2   8  -1   15.93    1.12
   2  -7   1   -0.02    0.16
   2  -7   1   -0.10    0.20
   2  -7   1   -0.03    0.31
   2  -7   1    0.13    0.28
   2  -7   1   -0.05    0.27
  -2   7  -1    0.14    0.21
  -2   7  -1    0.11    0.15
  -2   7  -1    0.05    0.16
  -2   7  -1    0.33    0.31
  -2   7  -1   -0.48    0.39
  -2   7  -1    0.17    0.33
   2  -6   1   46.41    3.22
   2  -6   1   49.00    3.26
   2  -6   1   47.49    3.22
  -2   6  -1   42.06    3.22
  -2   6  -1   46.09    3.20
  -2   6  -1   41.06    3.42
  -2   6  -1   48.11    3.22
  -2   6  -1   47.87    3.28
  -2   6  -1   49.82    3.35
  -2   6  -1   51.33    3.30
  -2   6  -1   47.74    3.23
   2  -5   1    0.08    0.11
   2  -5   1   -0.25    0.21
   2  -5   1    0.28    0.14
  -2   5  -1   -0.41    0.23
  -2   5  -1   -0.31    0.27
  -2   5  -1    0.02    0.11
  -2   5  -1   -0.05    0.12
   2  -4   1    2.40    0.42
   2  -4   1    2.03    0.45
  -2   4  -1    3.27    0.37
  -2   4  -1    2.66    0.33
  -2   4  -1    2.83    0.38
  -2   4  -1    3.00    0.51
  -2   4  -1    2.20    0.34
   2  -3   1    8.95    0.75
   2  -3   1    8.68    0.76
   2  -2   1   28.29    1.84
   2  -2   1   23.69    1.84
  -2   2  -1   25.96    1.85
   2  -1   1   24.05    1.56
   2  -1   1   22.87    1.50
   2  -1   1   18.70    1.51
   2   0   1  158.40   10.49
   2   0   1  131.09   10.45
   2   0   1  156.63   10.45
   2   0   1  153.59   10.45
  -2   0  -1  169.86   10.45
   2   1   1   32.10    2.04
   2   1   1   26.89    1.99
   2   1   1   25.17    1.99
   2   1   1   24.58    2.02
   2   1   1   27.83    2.00
  -2  -1  -1   27.88    2.04
  -2  -1  -1   32.86    2.00
  -2  -1  -1   32.84    2.04
   2   2   1   -0.07    0.25
   2   2   1    0.36    0.19
   2   2   1    0.92    0.22
   2   2   1    0.37    0.16
   2   2   1    0.51    0.16
   2   2   1   -0.13    0.21
  -2  -2  -1    0.36    0.17
  -2  -2  -1    0.53    0.25
  -2  -2  -1    0.40    0.22
  -2  -2  -1    0.44    0.17
   2   3   1    0.15    0.20
   2   3   1    0.05    0.16
   2   3   1    0.07    0.16
   2   3   1    0.06    0.25
   2   3   1    0.10    0.23
   2   3   1    0.14    0.21
   2   3   1    0.10    0.17
  -2  -3  -1    0.31    0.20
  -2  -3  -1   -0.31    0.26
  -2  -3  -1    0.08    0.16
  -2  -3  -1   -0.11    0.19
  -2  -3  -1   -0.17    0.17
   2   4   1   60.09    4.35
   2   4   1   62.04    4.30
   2   4   1   58.57    4.32
   2   4   1   69.01    4.31
   2   4   1   66.04    4.33
   2   4   1   59.89    4.28
   2   4   1   65.89    4.31
   2   4   1   65.85    4.33
  -2  -4  -1   63.23    4.32
  -2  -4  -1   65.11    4.31
  -2  -4  -1   53.47    4.30
   2   5   1   35.15    2.71
   2   5   1   36.67    2.62
   2   5   1   34.46    2.64
   2   5   1   35.71    2.72
   2   5   1   39.39    2.70
   2   5   1   39.38    2.65
   2   5   1   39.26    2.68
   2   5   1   40.20    2.66
  -2  -5  -1   43.37    2.68
  -2  -5  -1   38.81    2.65
  -2  -5  -1   32.02    2.74
  -2  -5  -1   40.41    2.65
   2   6   1   -0.49    0.32
   2   6   1   -0.10    0.24
   2   6   1   -0.51    0.37
   2   6   1   -0.09    0.24
   2   6   1   -0.43    0.25
   2   6   1   -0.32    0.35
   2   6   1    0.18    0.28
  -2  -6  -1    0.56    0.26
  -2  -6  -1    0.28    0.27
  -2  -6  -1   -0.03    0.22
  -2  -6  -1   -0.09    0.36
   2   7   1    3.66    0.59
   2   7   1    3.75    0.57
   2   7   1    4.76    0.59
   2   7   1    3.05    0.53
   2   7   1    4.92    0.62
   2   7   1    3.94    0.52
  -2  -7  -1    3.50    0.69
  -2  -7  -1    4.12    0.61
  -2  -7  -1    4.37    0.62
  -2  -7  -1    4.61    0.57
   2   8   1    7.12    0.87
   2   8   1    6.76    0.95
   2   8   1    7.91    0.74
   2   8   1    8.11    0.85
   2   8   1    6.92    0.95
   2   8   1    6.77    1.07
  -2  -8  -1    8.08    0.91
  -2  -8  -1   10.09    0.93
   2   9   1   10.86    1.22
   2   9   1   11.07    1.20
   2   9   1   12.70    1.14
   2   9   1    9.21    1.39
   2   9   1   11.63    1.01
  -2  -9  -1   12.42    1.19
  -2  -9  -1   13.06    1.19
   2  10   1   12.23    1.19
   2  10   1   12.26    1.35
   2  10   1   12.35    1.78
   2  10   1   15.06    1.35
  -2 -10  -1   14.98    1.36
  -2 -10  -1   14.79    1.36
   2  11   1    5.02    0.64
   2  11   1    5.36    0.76
   2  11   1    5.17    0.86
   2  11   1    6.11    0.87
  -2 -11  -1    4.86    1.07
  -2 -11  -1    6.40    0.86
   2  12   1    1.00    0.69
   2  12   1    2.29    0.66
   2  12   1    1.40    0.81
   2  12   1    1.09    0.52
  -2 -12  -1    1.47    0.68
  -2 -12  -1    0.14    0.57
   2  13   1    2.09    0.80
   2  13   1    2.99    0.76
   2  13   1    3.19    0.63
  -2 -13  -1    3.55    0.88
   2  14   1    0.34    0.77
   2  14   1   -0.27    0.60
   2  14   1    0.13    0.84
  -2 -14  -1   -0.51    0.62
  -2 -14  -1    0.25    0.82
   2  15   1    1.21    0.92
   2  15   1    1.48    0.99
   2  15   1    1.80    0.72
  -2 -15  -1    1.29    0.70
  -2 -15  -1    2.17    1.03
   3 -16   1   -0.02    0.89
  -3  16  -1   -0.04    0.52
  -3  16  -1    0.18    0.97
  -3  16  -1   -0.86    0.84
   3 -15   1   -1.87    0.78
  -3  15  -1    0.68    0.75
  -3  15  -1   -0.40    0.88
  -3  15  -1   -0.47    0.48
   3 -14   1   -0.12    0.75
  -3  14  -1    1.17    0.83
  -3  14  -1    0.45    0.42
  -3  14  -1    0.80    0.69
   3 -13   1    7.50    1.08
   3 -13   1    5.63    0.87
  -3  13  -1    5.31    1.16
  -3  13  -1    4.82    0.83
  -3  13  -1    4.91    0.73
  -3  13  -1    7.62    1.00
   3 -12   1    1.39    0.64
   3 -12   1    0.31    0.39
   3 -12   1    0.26    0.55
   3 -12   1    0.80    0.60
  -3  12  -1    0.51    0.32
  -3  12  -1    1.04    0.36
  -3  12  -1    0.54    0.65
  -3  12  -1    0.26    0.29
  -3  12  -1    0.25    0.69
  -3  12  -1    1.07    0.58
   3 -11   1   -0.08    0.47
   3 -11   1    0.99    0.59
   3 -11   1   -0.30    0.31
   3 -11   1    0.18    0.34
  -3  11  -1    0.09    0.89
  -3  11  -1    0.55    0.30
  -3  11  -1    0.00    0.28
  -3  11  -1    0.87    0.30
  -3  11  -1    0.31    0.60
   3 -10   1    1.04    0.48
   3 -10   1    1.27    0.26
   3 -10   1    0.67    0.34
   3 -10   1    0.40    0.31
   3 -10   1    1.37    0.51
  -3  10  -1    0.93    0.60
  -3  10  -1    0.63    0.26
  -3  10  -1    1.04    0.32
  -3  10  -1    0.97    0.28
  -3  10  -1    1.06    0.27
  -3  10  -1    0.55    0.56
  -3  10  -1    1.13    0.51
  -3  10  -1    0.77    0.51
   3  -9   1   14.84    1.19
   3  -9   1   18.02    1.40
   3  -9   1   14.65    1.18
   3  -9   1   15.15    1.13
   3  -9   1   16.81    1.29
  -3   9  -1   16.67    1.15
  -3   9  -1   14.33    1.46
  -3   9  -1   12.66    1.36
  -3   9  -1   15.05    1.12
  -3   9  -1   16.39    1.17
  -3   9  -1   15.62    1.33
  -3   9  -1   14.68    1.39
  -3   9  -1   15.67    1.14
   3  -8   1    2.65    0.44
   3  -8   1    3.39    0.40
   3  -8   1    3.55    0.32
   3  -8   1    3.32    0.48
   3  -8   1    4.71    0.78
  -3   8  -1    3.44    0.40
  -3   8  -1    2.84    0.35
  -3   8  -1    3.80    0.57
  -3   8  -1    2.60    0.49
  -3   8  -1    3.23    0.48
  -3   8  -1    3.32    0.46
  -3   8  -1    3.85    0.59
   3  -7   1    5.69    0.53
   3  -7   1    6.78    0.50
   3  -7   1    6.90    0.76
   3  -7   1    6.57    0.62
  -3   7  -1    5.45    0.56
  -3   7  -1    6.56    0.73
  -3   7  -1    5.70    0.50
  -3   7  -1    5.91    0.46
  -3   7  -1    6.26    0.47
  -3   7  -1    6.26    0.81
  -3   7  -1    5.76    0.85
  -3   7  -1    6.12    0.56
  -3   7  -1    5.50    0.68
   3  -6   1   29.53    2.25
  -3   6  -1   30.46    2.21
  -3   6  -1   31.94    2.29
  -3   6  -1   32.45    2.24
  -3   6  -1   31.88    2.17
  -3   6  -1   30.69    2.18
   3  -5   1    0.60    0.27
  -3   5  -1    1.17    0.25
  -3   5  -1    0.71    0.32
  -3   5  -1    1.07    0.27
  -3   5  -1    1.20    0.23
  -3   5  -1    1.44    0.24
  -3   5  -1    1.11    0.31
  -3   5  -1    0.60    0.35
   3  -4   1   -0.20    0.21
  -3   4  -1    0.01    0.19
  -3   4  -1    0.05    0.17
  -3   4  -1   -0.23    0.17
  -3   4  -1   -0.21    0.25
  -3   4  -1    0.21    0.36
  -3   4  -1    0.03    0.23
  -3   4  -1    0.09    0.17
   3  -3   1    5.16    0.60
   3  -3   1    5.11    0.55
  -3   3  -1    6.44    0.49
  -3   3  -1    6.40    0.56
  -3   3  -1    4.86    0.47
   3  -2   1  164.52   10.05
   3  -2   1  136.78   10.05
   3  -2   1  131.72   10.03
   3  -2   1  147.77   10.03
   3  -2   1  149.93   10.08
   3  -2   1  128.93   10.04
  -3   2  -1  169.01   10.03
  -3   2  -1  136.03   10.05
  -3   2  -1  165.05   10.03
   3  -1   1   13.94    1.08
   3  -1   1   14.90    1.02
   3  -1   1   13.44    0.97
   3  -1   1   12.25    1.00
   3  -1   1   13.13    0.98
  -3   1  -1   13.31    0.98
  -3   1  -1   12.98    1.00
  -3   1  -1   16.54    1.07
  -3   1  -1   14.12    0.97
   3   0   1   48.70    3.63
   3   0   1   60.40    3.59
   3   0   1   54.84    3.63
   3   0   1   54.93    3.60
   3   0   1   57.44    3.61
   3   0   1   47.44    3.60
   3   0   1   52.64    3.60
  -3   0  -1   49.06    3.61
  -3   0  -1   49.85    3.65
  -3   0  -1   50.77    3.61
   3   1   1   11.97    0.87
   3   1   1   10.16    0.79
   3   1   1   10.10    0.81
   3   1   1   10.40    0.79
   3   1   1   10.10    0.83
   3   1   1   10.57    0.79
   3   1   1    9.93    0.77
  -3  -1  -1   10.71    0.78
  -3  -1  -1    9.64    0.78
  -3  -1  -1   10.92    0.84
   3   2   1    3.28    0.39
   3   2   1    2.82    0.40
   3   2   1    3.12    0.39
   3   2   1    2.69    0.44
   3   2   1    3.71    0.52
   3   2   1    3.61    0.47
  -3  -2  -1    4.17    0.40
  -3  -2  -1    3.71    0.40
  -3  -2  -1    2.42    0.40
  -3  -2  -1    2.95    0.52
  -3  -2  -1    3.01    0.34
   3   3   1   12.58    1.04
   3   3   1   13.51    0.96
   3   3   1   12.53    0.95
   3   3   1   11.84    1.03
   3   3   1   12.36    0.97
   3   3   1   12.35    1.03
   3   3   1   12.61    0.99
   3   3   1   13.12    0.98
  -3  -3  -1   13.68    0.98
  -3  -3  -1   13.18    0.94
   3   4   1    2.70    0.33
   3   4   1    2.12    0.31
   3   4   1    2.12    0.37
   3   4   1    2.35    0.32
   3   4   1    2.49    0.41
   3   4   1    3.07    0.46
   3   4   1    2.95    0.32
  -3  -4  -1    2.63    0.30
  -3  -4  -1    1.99    0.32
  -3  -4  -1    4.27    0.82
  -3  -4  -1    2.98    0.47
  -3  -4  -1    2.36    0.37
   3   5   1    1.12    0.28
   3   5   1    1.94    0.44
   3   5   1    2.01    0.29
   3   5   1    1.40    0.30
   3   5   1    1.95    0.43
   3   5   1    1.30    0.36
   3   5   1    2.18    0.32
  -3  -5  -1    1.95    0.28
  -3  -5  -1    1.33    0.29
  -3  -5  -1    2.85    0.57
  -3  -5  -1    1.79    0.35
  -3  -5  -1    1.78    0.31
   3   6   1   -0.27    0.27
   3   6   1    0.20    0.26
   3   6   1    0.03    0.29
   3   6   1    0.00    0.42
   3   6   1   -0.11    0.33
   3   6   1   -0.19    0.40
   3   6   1   -0.15    0.27
  -3  -6  -1   -0.08    0.30
  -3  -6  -1    0.11    0.23
  -3  -6  -1   -0.22    0.36
  -3  -6  -1    0.14    0.26
  -3  -6  -1   -0.05    0.26
   3   7   1    4.63    0.59
   3   7   1    4.49    0.66
   3   7   1    3.99    0.60
   3   7   1    5.33    0.68
   3   7   1    4.44    0.77
   3   7   1    5.56    0.67
  -3  -7  -1    4.85    0.49
  -3  -7  -1    3.98    0.57
  -3  -7  -1    4.95    0.69
  -3  -7  -1    5.10    0.75
  -3  -7  -1    5.45    0.73
   3   8   1   27.02    2.00
   3   8   1   25.75    2.08
   3   8   1   26.85    2.17
   3   8   1   28.00    2.01
   3   8   1   26.22    1.95
   3   8   1   26.90    2.08
  -3  -8  -1   28.51    1.96
  -3  -8  -1   28.26    2.04
  -3  -8  -1   27.13    2.02
  -3  -8  -1   22.76    2.00
   3   9   1    0.75    0.39
   3   9   1    0.81    0.45
   3   9   1    0.85    0.42
   3   9   1   -0.63    0.55
   3   9   1    0.69    0.56
   3   9   1   -0.92    0.89
  -3  -9  -1    0.04    0.58
  -3  -9  -1    0.47    0.43
   3  10   1   -0.31    0.43
   3  10   1   -0.09    0.58
   3  10   1   -0.76    0.62
   3  10   1   -0.09    0.39
   3  10   1   -0.31    0.55
  -3 -10  -1   -0.63    0.61
  -3 -10  -1   -0.46    0.47
   3  11   1    1.48    0.48
   3  11   1   -0.05    0.67
   3  11   1    1.09    0.50
   3  11   1    1.10    0.59
   3  11   1    1.37    0.72
  -3 -11  -1    1.11    0.72
   3  12   1    2.78    0.72
   3  12   1    2.23    0.59
   3  12   1    2.26    0.86
   3  12   1    1.39    0.76
  -3 -12  -1    1.92    0.80
   3  13   1    6.11    0.99
   3  13   1    5.73    0.91
   3  13   1    6.09    0.79
  -3 -13  -1    6.60    1.01
   3  14   1    0.63    0.91
   3  14   1    0.42    0.81
   3  14   1    0.40    0.64
  -3 -14  -1   -0.44    0.63
  -3 -14  -1    1.08    0.93
   3  15   1    0.42    0.80
   3  15   1    3.18    1.08
   3  15   1    1.12    0.93
  -3 -15  -1    1.37    1.05
  -3 -15  -1    2.03    0.77
   4 -16   1   -0.63    0.53
   4 -16   1   -0.85    0.91
  -4  16  -1    0.17    0.86
  -4  16  -1   -0.18    0.50
  -4  16  -1    0.13    0.93
   4 -15   1   -0.17    0.81
  -4  15  -1    0.11    0.47
  -4  15  -1   -0.59    0.79
  -4  15  -1    0.22    0.87
   4 -14   1   -0.14    0.72
  -4  14  -1   -0.45    0.66
  -4  14  -1    0.02    0.81
  -4  14  -1   -0.36    0.40
   4 -13   1   15.09    1.45
   4 -13   1   13.48    1.63
  -4  13  -1   13.31    1.14
  -4  13  -1   14.93    2.00
  -4  13  -1   13.69    1.49
  -4  13  -1   14.31    1.13
   4 -12   1   -0.83    0.38
   4 -12   1   -0.34    0.58
   4 -12   1   -0.74    0.57
   4 -12   1    0.07    0.32
  -4  12  -1   -0.24    0.32
  -4  12  -1    0.37    0.27
  -4  12  -1   -0.03    0.71
  -4  12  -1   -0.53    0.70
  -4  12  -1    0.15    0.57
  -4  12  -1   -0.03    0.36
   4 -11   1    4.15    0.49
   4 -11   1    2.88    0.41
   4 -11   1    4.12    0.65
   4 -11   1    3.59    0.67
   4 -11   1    3.89    0.50
  -4  11  -1    3.70    0.75
  -4  11  -1    2.79    0.73
  -4  11  -1    4.01    0.40
  -4  11  -1    2.96    0.47
  -4  11  -1    3.48    0.66
  -4  11  -1    4.02    0.85
  -4  11  -1    3.49    0.39
   4 -10   1    8.98    0.76
   4 -10   1    9.22    0.96
   4 -10   1    9.14    0.82
   4 -10   1   10.04    0.85
   4 -10   1   10.48    1.27
  -4  10  -1    8.76    1.03
  -4  10  -1    8.93    1.22
  -4  10  -1    8.94    0.76
  -4  10  -1    9.04    0.74
  -4  10  -1    8.36    1.14
  -4  10  -1    8.83    1.11
  -4  10  -1    9.56    0.88
   4  -9   1    2.00    0.28
   4  -9   1    3.00    0.55
   4  -9   1    2.22    0.48
  -4   9  -1    2.69    0.38
  -4   9  -1    1.65    0.52
  -4   9  -1    2.51    0.33
  -4   9  -1    1.73    0.59
  -4   9  -1    2.57    0.60
  -4   9  -1    2.71    0.36
  -4   9  -1    1.68    0.48
   4  -8   1    1.40    0.43
   4  -8   1    1.50    0.39
  -4   8  -1    1.56    0.32
  -4   8  -1    1.22    0.43
  -4   8  -1    0.67    0.39
  -4   8  -1    1.08    0.49
  -4   8  -1    1.39    0.18
  -4   8  -1    1.22    0.17
  -4   8  -1    1.63    0.32
  -4   8  -1    1.33    0.48
   4  -7   1    9.51    0.97
  -4   7  -1   10.30    0.79
  -4   7  -1   10.07    0.98
  -4   7  -1   10.86    0.91
  -4   7  -1    9.57    0.87
  -4   7  -1    8.68    1.01
  -4   7  -1    8.31    0.80
   4  -6   1    1.75    0.37
  -4   6  -1    2.30    0.31
  -4   6  -1    1.98    0.34
  -4   6  -1    2.32    0.33
  -4   6  -1    2.14    0.39
  -4   6  -1    1.58    0.71
  -4   6  -1    2.22    0.31
  -4   6  -1    2.31    0.38
   4  -5   1   22.34    1.69
  -4   5  -1   23.55    1.59
  -4   5  -1   20.37    1.64
  -4   5  -1   23.03    1.60
  -4   5  -1   22.31    1.61
  -4   5  -1   22.78    1.59
   4  -4   1    5.03    0.73
   4  -4   1    5.74    0.66
   4  -4   1    6.02    0.69
  -4   4  -1    6.82    0.59
  -4   4  -1    6.80    0.62
  -4   4  -1    6.94    0.54
  -4   4  -1    6.23    0.56
  -4   4  -1    7.17    0.56
   4  -3   1   11.26    0.81
   4  -3   1   10.25    0.89
   4  -3   1   11.12    0.81
   4  -3   1   10.76    0.90
  -4   3  -1   11.24    0.86
  -4   3  -1   11.42    0.81
  -4   3  -1   12.85    0.88
  -4   3  -1   10.91    0.87
  -4   3  -1   13.17    0.81
  -4   3  -1   11.10    0.86
  -4   3  -1   11.56    0.88
   4  -2   1    3.69    0.35
   4  -2   1    3.55    0.31
   4  -2   1    4.24    0.42
   4  -2   1    4.18    0.45
   4  -2   1    3.54    0.41
   4  -2   1    4.21    0.36
  -4   2  -1    3.60    0.31
  -4   2  -1    4.74    0.43
  -4   2  -1    4.71    0.36
  -4   2  -1    4.69    0.36
  -4   2  -1    3.55    0.39
   4  -1   1    4.39    0.37
   4  -1   1    4.21    0.46
   4  -1   1    4.01    0.46
   4  -1   1    4.15    0.39
  -4   1  -1    5.36    0.37
  -4   1  -1    4.69    0.40
  -4   1  -1    4.70    0.56
  -4   1  -1    3.57    0.40
  -4   1  -1    4.92    0.42
  -4   1  -1    3.56    0.44
   4   0   1    2.73    0.42
   4   0   1    2.44    0.33
   4   0   1    2.95    0.39
   4   0   1    2.92    0.30
   4   0   1    2.35    0.36
  -4   0  -1    3.21    0.50
  -4   0  -1    3.46    0.31
  -4   0  -1    2.47    0.32
  -4   0  -1    3.15    0.37
  -4   0  -1    2.17    0.33
  -4   0  -1    3.29    0.36
   4   1   1    0.71    0.19
   4   1   1    1.11    0.20
   4   1   1    1.60    0.32
   4   1   1    1.07    0.19
   4   1   1    1.25    0.25
   4   1   1    1.06    0.18
  -4  -1  -1    1.49    0.23
  -4  -1  -1    1.22    0.22
  -4  -1  -1    0.84    0.26
  -4  -1  -1    0.90    0.20
  -4  -1  -1    0.94    0.19
  -4  -1  -1    1.28    0.19
  -4  -1  -1    1.58    0.26
  -4  -1  -1    0.96    0.23
   4   2   1   57.67    4.41
   4   2   1   60.76    4.41
   4   2   1   60.69    4.42
   4   2   1   62.87    4.41
   4   2   1   62.72    4.39
   4   2   1   60.11    4.41
  -4  -2  -1   57.43    4.40
  -4  -2  -1   64.80    4.44
  -4  -2  -1   70.55    4.40
  -4  -2  -1   72.65    4.42
  -4  -2  -1   66.79    4.42
  -4  -2  -1   69.26    4.45
  -4  -2  -1   68.64    4.42
   4   3   1   22.67    1.61
   4   3   1   21.49    1.61
   4   3   1   20.68    1.63
   4   3   1   23.65    1.59
   4   3   1   20.89    1.58
   4   3   1   22.22    1.67
   4   3   1   22.11    1.58
   4   3   1   21.33    1.65
  -4  -3  -1   22.18    1.62
  -4  -3  -1   20.63    1.63
  -4  -3  -1   22.48    1.58
  -4  -3  -1   22.67    1.59
  -4  -3  -1   24.30    1.66
  -4  -3  -1   24.62    1.62
   4   4   1    2.82    0.36
   4   4   1    2.96    0.43
   4   4   1    3.48    0.37
   4   4   1    3.40    0.51
   4   4   1    3.20    0.36
   4   4   1    3.73    0.52
   4   4   1    3.02    0.45
   4   4   1    3.09    0.45
   4   4   1    2.20    0.39
  -4  -4  -1    3.60    0.37
  -4  -4  -1    2.88    0.42
  -4  -4  -1    2.91    0.60
  -4  -4  -1    3.88    0.53
  -4  -4  -1    3.76    0.46
  -4  -4  -1    2.85    0.37
   4   5   1    0.81    0.35
   4   5   1    0.64    0.27
   4   5   1    0.72    0.28
   4   5   1    0.78    0.46
   4   5   1    0.50    0.27
   4   5   1    0.85    0.25
   4   5   1    0.64    0.29
   4   5   1    0.70    0.31
   4   5   1    0.60    0.44
  -4  -5  -1    1.11    0.48
  -4  -5  -1    0.72    0.26
  -4  -5  -1    0.35    0.27
  -4  -5  -1    0.58    0.31
  -4  -5  -1    1.04    0.39
  -4  -5  -1    0.64    0.30
   4   6   1   15.65    1.39
   4   6   1   14.68    1.30
   4   6   1   15.58    1.34
   4   6   1   16.61    1.43
   4   6   1   16.41    1.24
   4   6   1   16.64    1.18
   4   6   1   15.11    1.20
   4   6   1   16.07    1.23
  -4  -6  -1   15.50    1.27
  -4  -6  -1   16.22    1.26
  -4  -6  -1   14.56    1.29
  -4  -6  -1   16.83    1.17
  -4  -6  -1   12.42    1.24
   4   7   1    2.69    0.45
   4   7   1    1.95    0.54
   4   7   1    2.24    0.61
   4   7   1    1.20    0.51
   4   7   1    2.05    0.40
   4   7   1    2.63    0.40
  -4  -7  -1    3.44    0.59
  -4  -7  -1    1.87    0.44
  -4  -7  -1    1.90    0.40
  -4  -7  -1    2.60    0.35
  -4  -7  -1    1.89    0.41
   4   8   1    1.05    0.42
   4   8   1    0.61    0.63
   4   8   1    0.93    0.40
   4   8   1    1.34    0.52
   4   8   1    1.22    0.43
   4   8   1    0.93    0.55
  -4  -8  -1    1.26    0.45
  -4  -8  -1    0.17    0.43
  -4  -8  -1    0.46    0.63
  -4  -8  -1    1.40    0.31
   4   9   1    2.98    0.55
   4   9   1    3.07    0.68
   4   9   1    3.23    0.50
   4   9   1    2.43    0.70
   4   9   1    2.38    0.65
   4   9   1    3.96    0.53
  -4  -9  -1    2.47    0.68
  -4  -9  -1    2.90    0.47
  -4  -9  -1    3.17    0.60
  -4  -9  -1    2.56    0.51
   4  10   1    0.15    0.61
   4  10   1    0.29    0.49
   4  10   1   -0.30    0.48
   4  10   1    0.46    0.47
   4  10   1   -0.98    0.66
  -4 -10  -1   -0.23    0.64
   4  11   1    0.23    0.57
   4  11   1   -0.15    0.53
   4  11   1   -0.22    0.72
   4  11   1    0.15    0.69
  -4 -11  -1   -0.06    0.53
  -4 -11  -1    0.00    0.69
   4  12   1    1.70    0.82
   4  12   1    1.35    0.59
   4  12   1    0.10    0.66
  -4 -12  -1    0.70    0.78
   4  13   1   -0.40    0.62
   4  13   1    0.54    0.74
   4  13   1   -1.15    0.81
  -4 -13  -1    0.06    0.87
   4  14   1   -0.21    0.87
   4  14   1    1.05    0.81
   4  14   1    1.37    0.75
  -4 -14  -1   -0.18    0.70
  -4 -14  -1   -0.72    0.98
   4  15   1   -0.63    0.91
  -4 -15  -1   -1.10    0.72
   5 -16   1   -0.11    0.55
   5 -16   1   -0.34    0.90
  -5  16  -1    0.87    0.98
  -5  16  -1    0.23    0.52
   5 -15   1    0.68    0.49
   5 -15   1    1.34    0.81
  -5  15  -1    1.47    0.45
  -5  15  -1    2.69    0.94
  -5  15  -1    1.27    0.83
   5 -14   1   -0.19    0.70
   5 -14   1   -0.22    0.79
  -5  14  -1   -0.34    0.38
  -5  14  -1   -0.42    0.68
  -5  14  -1    0.66    0.81
   5 -12   1    5.20    0.79
   5 -12   1    5.53    0.63
   5 -12   1    6.33    0.92
  -5  12  -1    6.05    0.62
  -5  12  -1    7.84    1.12
  -5  12  -1    5.61    0.78
  -5  12  -1    5.44    0.82
  -5  12  -1    5.57    0.64
   5 -11   1    2.36    0.60
   5 -11   1    2.74    0.46
   5 -11   1    2.17    0.33
  -5  11  -1    1.98    0.47
  -5  11  -1    3.13    0.42
  -5  11  -1    3.53    0.73
  -5  11  -1    2.35    0.70
  -5  11  -1    2.86    0.60
   5 -10   1   28.57    2.05
  -5  10  -1   24.51    1.97
  -5  10  -1   27.02    2.10
  -5  10  -1   25.41    1.89
  -5  10  -1   29.95    1.91
  -5  10  -1   28.26    2.00
  -5  10  -1   27.27    2.23
  -5  10  -1   27.35    2.15
   5  -9   1    0.06    0.49
   5  -9   1   -0.18    0.43
  -5   9  -1    0.32    0.34
  -5   9  -1   -0.35    0.42
  -5   9  -1    0.34    0.53
  -5   9  -1    0.03    0.33
  -5   9  -1   -0.09    0.16
  -5   9  -1   -0.11    0.44
  -5   9  -1   -0.28    0.15
   5  -8   1    7.87    1.00
  -5   8  -1    7.35    0.87
  -5   8  -1    6.52    0.99
  -5   8  -1    6.66    0.82
  -5   8  -1    7.67    0.74
  -5   8  -1    7.40    0.68
   5  -7   1   -0.53    0.36
  -5   7  -1    0.43    0.30
  -5   7  -1    0.12    0.28
  -5   7  -1   -0.28    0.32
  -5   7  -1   -0.03    0.35
  -5   7  -1   -0.43    0.28
  -5   7  -1   -0.01    0.37
   5  -6   1   52.90    3.79
   5  -6   1   54.37    3.76
  -5   6  -1   53.34    3.72
  -5   6  -1   58.20    3.77
  -5   6  -1   53.17    3.69
  -5   6  -1   52.19    3.71
  -5   6  -1   49.60    3.70
  -5   6  -1   54.58    3.73
   5  -5   1   52.03    3.60
   5  -5   1   50.36    3.63
  -5   5  -1   52.02    3.53
  -5   5  -1   52.94    3.57
  -5   5  -1   49.74    3.55
  -5   5  -1   50.41    3.55
  -5   5  -1   52.59    3.59
  -5   5  -1   50.25    3.55
   5  -4   1    0.04    0.30
   5  -4   1   -0.30    0.25
  -5   4  -1   -0.04    0.28
  -5   4  -1   -0.15    0.25
  -5   4  -1   -0.21    0.11
  -5   4  -1   -0.11    0.23
  -5   4  -1   -0.20    0.20
   5  -3   1  165.17   12.41
   5  -3   1  164.07   12.41
   5  -3   1  194.78   12.41
   5  -3   1  178.21   12.38
   5  -3   1  173.65   12.39
   5  -3   1  181.17   12.40
   5  -3   1  196.18   12.44
  -5   3  -1  182.84   12.40
  -5   3  -1  187.04   12.41
  -5   3  -1  182.29   12.43
  -5   3  -1  198.27   12.48
  -5   3  -1  183.08   12.43
  -5   3  -1  185.63   12.40
  -5   3  -1  183.60   12.38
   5  -2   1   20.53    1.47
   5  -2   1   20.44    1.53
   5  -2   1   21.07    1.48
   5  -2   1   23.60    1.54
   5  -2   1   20.71    1.46
  -5   2  -1   19.93    1.46
  -5   2  -1   21.71    1.49
  -5   2  -1   18.94    1.49
  -5   2  -1   21.32    1.61
  -5   2  -1   21.05    1.48
  -5   2  -1   22.13    1.52
  -5   2  -1   21.27    1.52
   5  -1   1   12.79    0.97
   5  -1   1   12.89    0.90
   5  -1   1   11.70    0.98
   5  -1   1   12.32    0.92
  -5   1  -1   13.26    0.94
  -5   1  -1   12.72    0.96
  -5   1  -1   10.81    0.93
  -5   1  -1   13.15    0.96
  -5   1  -1   11.91    0.94
  -5   1  -1   12.86    1.07
   5   0   1   65.20    4.61
   5   0   1   64.21    4.65
   5   0   1   64.14    4.63
   5   0   1   65.60    4.63
   5   0   1   65.10    4.62
  -5   0  -1   66.42    4.68
  -5   0  -1   72.98    4.61
  -5   0  -1   71.98    4.64
  -5   0  -1   69.08    4.63
  -5   0  -1   70.20    4.63
   5   1   1   26.11    1.92
   5   1   1   26.99    1.91
   5   1   1   26.19    1.88
   5   1   1   26.37    1.95
   5   1   1   26.11    1.91
   5   1   1   24.23    1.89
  -5  -1  -1   25.96    1.91
  -5  -1  -1   28.41    1.92
  -5  -1  -1   28.87    1.93
  -5  -1  -1   27.54    1.98
  -5  -1  -1   26.89    1.91
  -5  -1  -1   28.92    1.91
  -5  -1  -1   27.41    1.91
   5   2   1    0.77    0.24
   5   2   1    0.77    0.23
   5   2   1    0.92    0.26
   5   2   1    0.93    0.42
   5   2   1    0.73    0.24
   5   2   1    0.45    0.32
  -5  -2  -1    1.12    0.26
  -5  -2  -1    0.89    0.26
  -5  -2  -1    1.06    0.30
  -5  -2  -1    1.03    0.31
  -5  -2  -1    0.97    0.33
  -5  -2  -1    0.95    0.24
  -5  -2  -1    0.71    0.29
  -5  -2  -1    0.93    0.25
   5   3   1   40.20    2.61
   5   3   1   36.05    2.67
   5   3   1   36.65    2.65
   5   3   1   36.72    2.62
   5   3   1   37.09    2.64
   5   3   1   37.80    2.62
   5   3   1   38.43    2.69
   5   3   1   37.30    2.66
  -5  -3  -1   38.13    2.65
  -5  -3  -1   38.21    2.63
  -5  -3  -1   37.42    2.65
  -5  -3  -1   37.89    2.62
  -5  -3  -1   38.69    2.62
  -5  -3  -1   38.01    2.69
  -5  -3  -1   35.93    2.65
   5   4   1    2.22    0.39
   5   4   1    2.65    0.43
   5   4   1    1.74    0.32
   5   4   1    2.84    0.45
   5   4   1    2.05    0.33
   5   4   1    2.68    0.36
   5   4   1    2.41    0.49
   5   4   1    2.83    0.34
  -5  -4  -1    3.08    0.36
  -5  -4  -1    2.19    0.36
  -5  -4  -1    2.04    0.44
  -5  -4  -1    2.02    0.37
  -5  -4  -1    2.28    0.34
  -5  -4  -1    2.41    0.37
   5   5   1   13.91    1.13
   5   5   1   15.63    1.09
   5   5   1   12.87    1.22
   5   5   1   14.72    1.27
   5   5   1   15.50    1.11
   5   5   1   13.85    1.17
   5   5   1   14.73    1.17
   5   5   1   13.20    1.10
   5   5   1   13.73    1.22
  -5  -5  -1   15.73    1.19
  -5  -5  -1   11.97    1.16
  -5  -5  -1   14.27    1.10
  -5  -5  -1   14.62    1.14
  -5  -5  -1   13.99    1.24
  -5  -5  -1   15.38    1.20
   5   6   1    2.12    0.62
   5   6   1    2.26    0.41
   5   6   1    2.65    0.50
   5   6   1    3.83    0.43
   5   6   1    3.20    0.38
   5   6   1    2.59    0.43
   5   6   1    2.17    0.55
   5   6   1    2.92    0.43
  -5  -6  -1    2.69    0.44
  -5  -6  -1    3.51    0.58
  -5  -6  -1    3.13    0.41
  -5  -6  -1    2.10    0.43
  -5  -6  -1    2.86    0.44
  -5  -6  -1    1.71    0.44
   5   7   1    7.81    0.85
   5   7   1    6.26    0.95
   5   7   1    7.09    1.12
   5   7   1    7.74    0.87
   5   7   1    6.67    0.79
   5   7   1    6.26    0.67
   5   7   1    7.19    0.89
   5   7   1    6.20    0.96
  -5  -7  -1    8.35    1.05
  -5  -7  -1    7.21    0.89
  -5  -7  -1    6.06    0.92
  -5  -7  -1    7.48    0.71
  -5  -7  -1    6.79    0.96
  -5  -7  -1    7.48    0.96
   5   8   1    2.98    0.74
   5   8   1    3.97    0.55
   5   8   1    2.89    0.64
   5   8   1    3.51    0.47
   5   8   1    3.21    0.67
   5   8   1    3.04    0.52
   5   8   1    3.46    0.55
  -5  -8  -1    3.38    0.56
  -5  -8  -1    2.96    0.58
  -5  -8  -1    3.05    0.54
  -5  -8  -1    3.79    0.71
   5   9   1    0.92    0.64
   5   9   1    0.54    0.46
   5   9   1    0.99    0.49
   5   9   1    0.26    0.69
   5   9   1    0.80    0.48
   5   9   1    0.61    0.67
  -5  -9  -1   -0.21    0.46
  -5  -9  -1    0.53    0.35
  -5  -9  -1    0.85    0.58
  -5  -9  -1    0.23    0.64
   5  10   1    4.40    0.83
   5  10   1    4.63    0.65
   5  10   1    3.52    0.58
   5  10   1    5.19    0.89
   5  10   1    3.33    0.64
  -5 -10  -1    3.59    0.84
  -5 -10  -1    2.67    0.62
   5  11   1    0.12    0.57
   5  11   1    0.03    0.80
   5  11   1    0.70    0.60
   5  11   1    0.48    0.76
  -5 -11  -1   -0.74    0.73
  -5 -11  -1   -0.44    0.74
   5  12   1    0.83    0.87
   5  12   1   -0.06    0.62
   5  12   1    0.74    0.67
  -5 -12  -1    0.09    0.85
   5  13   1   -0.09    0.78
   5  13   1    0.41    0.97
   5  13   1    0.52    0.69
  -5 -13  -1    0.42    0.66
  -5 -13  -1   -1.34    0.89
   5  14   1   -0.13    0.82
   5  14   1   -0.53    1.00
   5  14   1   -0.98    0.75
  -5 -14  -1    0.17    0.74
   6 -16   1    5.27    1.06
   6 -16   1    4.57    0.68
  -6  16  -1    4.23    0.63
  -6  16  -1    7.53    1.25
   6 -15   1    0.71    0.49
   6 -15   1    0.76    0.80
  -6  15  -1    2.13    1.02
  -6  15  -1    0.45    0.43
   6 -14   1    0.76    0.71
   6 -14   1    0.78    0.41
   6 -14   1    1.57    0.98
  -6  14  -1    0.64    0.35
  -6  14  -1    0.40    0.73
  -6  14  -1   -0.07    0.50
  -6  14  -1    1.34    0.96
   6 -13   1    0.23    0.67
   6 -13   1   -0.39    0.33
   6 -13   1    1.87    0.85
  -6  13  -1    0.69    0.85
  -6  13  -1    0.14    0.32
  -6  13  -1   -0.48    0.29
  -6  13  -1   -0.72    0.47
  -6  13  -1   -0.29    0.67
   6 -12   1   15.31    1.28
   6 -12   1   12.54    1.12
  -6  12  -1   14.79    1.27
  -6  12  -1   14.02    1.49
  -6  12  -1   16.93    1.58
  -6  12  -1   14.90    1.10
   6 -11   1    1.34    0.53
  -6  11  -1    0.93    0.45
  -6  11  -1    0.66    0.23
  -6  11  -1    0.12    0.42
  -6  11  -1    1.29    0.27
  -6  11  -1    1.37    0.67
  -6  11  -1    0.30    0.56
  -6  11  -1   -0.24    0.68
   6 -10   1    8.99    0.99
  -6  10  -1   10.52    0.97
  -6  10  -1    9.27    1.31
   6  -9   1   10.40    1.34
   6  -9   1    9.09    0.90
  -6   9  -1    8.64    0.90
  -6   9  -1    8.99    1.13
  -6   9  -1    8.74    0.85
  -6   9  -1    7.17    1.00
  -6   9  -1    8.00    1.18
   6  -8   1   42.82    3.11
   6  -8   1   45.29    3.16
  -6   8  -1   41.76    3.00
  -6   8  -1   42.50    2.99
  -6   8  -1   42.47    3.12
  -6   8  -1   38.85    3.05
  -6   8  -1   43.89    3.04
   6  -7   1    1.21    0.48
   6  -7   1    0.96    0.43
  -6   7  -1    1.20    0.41
  -6   7  -1    1.61    0.32
  -6   7  -1    1.39    0.36
  -6   7  -1    1.60    0.44
  -6   7  -1    0.92    0.36
  -6   7  -1    0.73    0.37
   6  -6   1    8.56    0.90
   6  -6   1    8.19    1.00
  -6   6  -1    8.96    0.72
  -6   6  -1    8.96    0.79
  -6   6  -1    9.07    0.84
  -6   6  -1    8.09    0.77
   6  -5   1    2.42    0.43
   6  -5   1    1.69    0.41
  -6   5  -1    2.54    0.36
  -6   5  -1    2.50    0.37
  -6   5  -1    2.36    0.40
  -6   5  -1    2.63    0.44
   6  -4   1   31.94    2.20
   6  -4   1   33.72    2.26
   6  -4   1   33.39    2.32
   6  -4   1   28.71    2.27
   6  -4   1   28.54    2.27
   6  -4   1   31.95    2.22
   6  -4   1   32.34    2.21
  -6   4  -1   33.54    2.22
  -6   4  -1   34.11    2.28
  -6   4  -1   34.25    2.20
  -6   4  -1   32.61    2.23
  -6   4  -1   32.01    2.22
  -6   4  -1   32.81    2.29
  -6   4  -1   30.38    2.19
  -6   4  -1   31.45    2.28
   6  -3   1   56.37    4.04
   6  -3   1   55.78    4.04
   6  -3   1   66.40    4.10
   6  -3   1   60.95    4.03
   6  -3   1   66.04    4.05
   6  -3   1   59.22    4.01
   6  -3   1   59.26    4.03
   6  -3   1   60.47    4.09
  -6   3  -1   54.03    4.01
  -6   3  -1   60.46    4.03
  -6   3  -1   57.76    4.03
  -6   3  -1   49.52    4.06
  -6   3  -1   58.65    4.03
  -6   3  -1   58.13    4.06
  -6   3  -1   59.66    4.14
   6  -2   1   80.87    5.72
   6  -2   1   85.05    5.73
   6  -2   1   80.97    5.76
   6  -2   1   83.66    5.71
   6  -2   1   88.64    5.76
  -6   2  -1   80.53    5.75
  -6   2  -1   81.93    5.72
  -6   2  -1   89.99    5.73
  -6   2  -1   81.34    5.81
  -6   2  -1   86.31    5.76
  -6   2  -1   84.16    5.71
  -6   2  -1   82.17    5.73
   6  -1   1  103.95    7.37
   6  -1   1  108.40    7.36
   6  -1   1  107.95    7.39
   6  -1   1  104.37    7.40
  -6   1  -1  108.43    7.38
  -6   1  -1  108.29    7.40
  -6   1  -1  106.53    7.36
  -6   1  -1  106.82    7.45
  -6   1  -1  118.96    7.38
  -6   1  -1  104.19    7.40
  -6   1  -1  111.11    7.40
   6   0   1    0.34    0.38
   6   0   1    1.14    0.26
   6   0   1    1.56    0.23
   6   0   1    1.17    0.23
   6   0   1    1.38    0.34
  -6   0  -1    1.16    0.29
  -6   0  -1    0.64    0.33
  -6   0  -1    1.34    0.35
  -6   0  -1    1.21    0.27
  -6   0  -1    1.33    0.28
  -6   0  -1    1.53    0.23
   6   1   1   28.10    1.90
   6   1   1   28.02    1.94
   6   1   1   27.77    1.93
   6   1   1   28.26    1.99
   6   1   1   27.43    1.94
   6   1   1   25.69    1.91
  -6  -1  -1   28.34    1.94
  -6  -1  -1   27.17    1.90
  -6  -1  -1   26.73    1.94
  -6  -1  -1   26.94    1.93
  -6  -1  -1   26.51    1.94
  -6  -1  -1   23.89    1.93
  -6  -1  -1   26.90    2.02
   6   2   1   41.82    2.95
   6   2   1   40.31    2.95
   6   2   1   41.88    2.95
   6   2   1   42.88    2.95
   6   2   1   41.72    2.92
   6   2   1   42.07    3.00
  -6  -2  -1   42.68    3.02
  -6  -2  -1   41.69    2.94
  -6  -2  -1   41.70    2.96
  -6  -2  -1   44.51    2.96
  -6  -2  -1   41.66    2.98
  -6  -2  -1   41.92    2.92
  -6  -2  -1   43.40    2.96
   6   3   1   21.57    1.54
   6   3   1   21.53    1.60
   6   3   1   21.62    1.59
   6   3   1   21.91    1.66
   6   3   1   22.59    1.53
   6   3   1   21.71    1.58
   6   3   1   22.42    1.58
   6   3   1   20.45    1.61
  -6  -3  -1   20.93    1.55
  -6  -3  -1   20.82    1.60
  -6  -3  -1   21.49    1.55
  -6  -3  -1   22.36    1.60
  -6  -3  -1   20.10    1.56
  -6  -3  -1   21.52    1.67
  -6  -3  -1   17.71    1.58
   6   4   1   37.76    2.66
   6   4   1   39.60    2.62
   6   4   1   37.29    2.67
   6   4   1   38.68    2.73
   6   4   1   35.62    2.66
   6   4   1   36.68    2.62
   6   4   1   36.25    2.70
   6   4   1   36.83    2.62
  -6  -4  -1   36.83    2.72
  -6  -4  -1   37.60    2.63
  -6  -4  -1   39.33    2.67
  -6  -4  -1   36.87    2.68
  -6  -4  -1   36.15    2.63
   6   5   1   17.23    1.50
   6   5   1   16.43    1.32
   6   5   1   17.30    1.31
   6   5   1   18.60    1.38
   6   5   1   16.43    1.40
   6   5   1   15.22    1.40
   6   5   1   17.56    1.32
   6   5   1   15.39    1.48
   6   5   1   18.70    1.30
  -6  -5  -1   15.13    1.29
  -6  -5  -1   16.11    1.43
  -6  -5  -1   17.95    1.41
  -6  -5  -1   19.76    1.42
  -6  -5  -1   16.38    1.45
  -6  -5  -1   17.65    1.34
   6   6   1    2.59    0.46
   6   6   1    2.06    0.37
   6   6   1    1.81    0.50
   6   6   1    1.01    0.55
   6   6   1    1.73    0.69
   6   6   1    1.35    0.41
   6   6   1    1.61    0.44
   6   6   1    2.20    0.41
  -6  -6  -1    2.62    0.45
  -6  -6  -1    1.73    0.44
  -6  -6  -1    1.76    0.60
  -6  -6  -1    1.47    0.46
  -6  -6  -1    2.06    0.42
  -6  -6  -1    1.07    0.45
   6   7   1    4.01    0.52
   6   7   1    4.36    0.54
   6   7   1    2.76    0.52
   6   7   1    3.28    0.66
   6   7   1    3.28    0.64
   6   7   1    4.01    0.58
   6   7   1    4.15    0.54
   6   7   1    4.60    0.81
  -6  -7  -1    3.39    0.54
  -6  -7  -1    3.40    0.48
  -6  -7  -1    3.44    0.56
  -6  -7  -1    3.48    0.80
  -6  -7  -1    2.30    0.55
  -6  -7  -1    3.26    0.62
   6   8   1   -0.62    0.70
   6   8   1   -0.17    0.40
   6   8   1   -0.02    0.46
   6   8   1   -0.48    0.57
   6   8   1   -0.09    0.48
   6   8   1   -0.42    0.42
   6   8   1   -0.39    0.57
  -6  -8  -1   -0.45    0.57
  -6  -8  -1   -0.40    0.38
  -6  -8  -1   -0.13    0.55
  -6  -8  -1   -0.19    0.51
  -6  -8  -1   -0.61    0.46
   6   9   1    3.71    0.60
   6   9   1    2.63    0.89
   6   9   1    2.61    0.54
   6   9   1    3.40    0.59
   6   9   1    2.85    0.73
   6   9   1    2.95    0.85
  -6  -9  -1    3.30    0.78
  -6  -9  -1    2.28    0.60
  -6  -9  -1    3.22    0.74
  -6  -9  -1    2.82    0.50
   6  10   1    4.45    0.87
   6  10   1    3.88    0.94
   6  10   1    4.45    0.71
   6  10   1    3.62    0.67
  -6 -10  -1    3.74    0.87
  -6 -10  -1    3.16    0.68
   6  11   1   -0.05    0.82
   6  11   1   -0.08    0.62
   6  11   1    0.49    0.81
   6  11   1    0.21    0.60
  -6 -11  -1   -0.25    0.79
   6  12   1    5.78    1.09
   6  12   1    4.38    0.84
   6  12   1    3.34    0.81
  -6 -12  -1    4.39    1.04
   6  13   1    1.90    1.10
   6  13   1    0.50    0.81
   6  13   1    0.76    0.85
  -6 -13  -1    0.60    1.01
  -6 -13  -1    1.20    0.75
   6  14   1    0.88    0.98
   7 -16   1    0.50    0.50
   7 -16   1    1.22    0.91
  -7  16  -1    1.89    1.16
  -7  16  -1    1.44    0.49
   7 -15   1    2.34    0.50
   7 -15   1    2.88    0.88
  -7  15  -1    4.72    1.09
  -7  15  -1    2.65    0.45
   7 -14   1   -0.05    0.39
   7 -14   1    0.79    0.70
  -7  14  -1    0.28    0.94
  -7  14  -1    0.25    0.34
  -7  14  -1   -0.58    0.58
   7 -13   1    6.97    0.77
   7 -13   1    6.98    0.73
   7 -13   1    7.49    1.12
   7 -13   1    9.70    0.98
  -7  13  -1    8.81    1.37
  -7  13  -1    7.61    0.69
  -7  13  -1    5.75    0.82
   7 -12   1    1.79    0.79
   7 -12   1    2.02    1.17
  -7  12  -1    1.13    0.47
   7 -11   1    6.52    1.22
   7 -11   1    6.48    0.93
  -7  11  -1    5.38    0.78
  -7  11  -1    4.49    0.93
  -7  11  -1    7.01    1.09
  -7  11  -1    5.48    0.72
  -7  11  -1    5.63    0.52
  -7  11  -1    6.24    0.55
   7 -10   1    7.89    0.87
   7 -10   1    6.32    1.18
  -7  10  -1    5.86    0.88
  -7  10  -1   10.41    1.21
  -7  10  -1    7.15    0.84
  -7  10  -1    7.67    0.92
   7  -9   1    0.78    0.59
   7  -9   1    0.14    0.60
  -7   9  -1    0.53    0.45
  -7   9  -1    1.89    0.59
  -7   9  -1    0.31    0.47
  -7   9  -1   -0.74    0.57
   7  -8   1   47.52    3.46
   7  -8   1   46.69    3.38
  -7   8  -1   44.99    3.27
  -7   8  -1   46.47    3.24
  -7   8  -1   48.20    3.33
  -7   8  -1   44.54    3.28
   7  -7   1    9.57    1.16
   7  -7   1   10.14    1.08
  -7   7  -1   10.80    0.85
  -7   7  -1   10.38    0.94
  -7   7  -1    9.75    0.91
  -7   7  -1    8.85    0.99
   7  -6   1    6.42    0.48
   7  -6   1    5.74    0.92
   7  -6   1    6.29    0.87
  -7   6  -1    6.50    0.60
  -7   6  -1    5.89    0.71
  -7   6  -1    5.65    0.69
  -7   6  -1    6.55    0.76
   7  -5   1   12.87    0.94
   7  -5   1   12.68    1.08
   7  -5   1   12.72    1.22
   7  -5   1    9.88    1.49
   7  -5   1   13.01    0.92
   7  -5   1   13.05    1.05
   7  -5   1   13.37    0.94
  -7   5  -1   13.37    1.07
  -7   5  -1   12.86    0.97
  -7   5  -1   11.91    0.91
  -7   5  -1   12.74    1.03
  -7   5  -1   12.92    1.09
  -7   5  -1   14.38    0.92
   7  -4   1    5.61    0.62
   7  -4   1    6.30    0.75
   7  -4   1    5.72    0.54
   7  -4   1    6.11    0.51
   7  -4   1    6.13    0.62
   7  -4   1    5.79    0.47
   7  -4   1    5.75    0.64
  -7   4  -1    5.67    0.54
  -7   4  -1    6.02    0.53
  -7   4  -1    5.29    0.66
  -7   4  -1    5.27    0.48
  -7   4  -1    5.37    0.46
  -7   4  -1    4.99    0.65
   7  -3   1    0.14    0.25
   7  -3   1   -0.02    0.20
   7  -3   1   -0.02    0.38
   7  -3   1    0.02    0.17
   7  -3   1    0.18    0.34
   7  -3   1    0.12    0.18
  -7   3  -1   -0.11    0.25
  -7   3  -1    0.32    0.35
  -7   3  -1   -0.03    0.18
  -7   3  -1   -0.48    0.30
  -7   3  -1   -0.49    0.29
  -7   3  -1    0.05    0.16
   7  -2   1   11.00    0.97
   7  -2   1   10.77    0.97
   7  -2   1   11.90    0.85
   7  -2   1   11.02    0.85
   7  -2   1   11.30    0.88
  -7   2  -1   11.44    0.83
  -7   2  -1   11.34    0.87
  -7   2  -1    9.84    0.87
  -7   2  -1   10.81    0.94
  -7   2  -1   11.02    0.91
  -7   2  -1   10.98    1.07
   7  -1   1    0.95    0.23
   7  -1   1    1.10    0.45
   7  -1   1    1.80    0.39
   7  -1   1    1.54    0.25
   7  -1   1    1.73    0.43
  -7   1  -1    1.34    0.24
  -7   1  -1    1.55    0.34
  -7   1  -1    1.16    0.29
  -7   1  -1    1.40    0.37
  -7   1  -1    1.58    0.35
  -7   1  -1    1.26    0.31
   7   0   1   17.55    1.37
   7   0   1   17.42    1.27
   7   0   1   16.78    1.29
   7   0   1   16.83    1.31
   7   0   1   17.77    1.34
  -7   0  -1   18.52    1.31
  -7   0  -1   17.53    1.30
  -7   0  -1   17.04    1.44
  -7   0  -1   16.89    1.26
   7   1   1    4.64    0.72
   7   1   1    3.61    0.50
   7   1   1    4.15    0.53
   7   1   1    3.99    0.59
   7   1   1    4.54    0.61
  -7  -1  -1    3.62    0.53
  -7  -1  -1    4.11    0.48
  -7  -1  -1    4.04    0.56
  -7  -1  -1    4.06    0.73
  -7  -1  -1    3.72    0.52
  -7  -1  -1    4.38    0.60
   7   2   1   18.30    1.39
   7   2   1   19.13    1.48
   7   2   1   16.54    1.38
   7   2   1   17.93    1.39
   7   2   1   19.55    1.37
   7   2   1   19.00    1.33
  -7  -2  -1   18.76    1.50
  -7  -2  -1   18.90    1.39
  -7  -2  -1   15.59    1.42
  -7  -2  -1   15.16    1.37
  -7  -2  -1   18.61    1.35
  -7  -2  -1   18.34    1.38
  -7  -2  -1   18.19    1.35
   7   3   1   -0.10    0.48
   7   3   1    0.21    0.40
   7   3   1    0.12    0.24
   7   3   1    0.19    0.31
   7   3   1    0.19    0.29
   7   3   1    0.10    0.30
   7   3   1   -0.51    0.29
  -7  -3  -1    0.23    0.32
  -7  -3  -1   -0.46    0.41
  -7  -3  -1    0.26    0.33
  -7  -3  -1    0.21    0.36
  -7  -3  -1   -0.14    0.29
   7   4   1   42.89    3.20
   7   4   1   45.41    3.13
   7   4   1   46.10    3.18
   7   4   1   48.54    3.11
   7   4   1   44.38    3.24
   7   4   1   37.78    3.18
   7   4   1   43.08    3.12
  -7  -4  -1   48.04    3.20
  -7  -4  -1   44.21    3.13
  -7  -4  -1   45.18    3.25
  -7  -4  -1   48.80    3.19
  -7  -4  -1   44.73    3.13
  -7  -4  -1   41.61    3.14
   7   5   1   22.22    1.83
   7   5   1   23.59    1.76
   7   5   1   24.51    1.74
   7   5   1   23.65    1.90
   7   5   1   25.46    1.95
   7   5   1   24.71    1.76
   7   5   1   24.29    1.82
  -7  -5  -1   23.95    1.93
  -7  -5  -1   25.23    1.85
  -7  -5  -1   20.86    1.84
  -7  -5  -1   23.99    1.78
  -7  -5  -1   19.86    1.74
   7   6   1    0.17    0.37
   7   6   1   -0.21    0.44
   7   6   1   -0.69    0.68
   7   6   1    0.04    0.37
   7   6   1    0.01    0.49
   7   6   1   -0.45    0.40
   7   6   1   -0.23    0.40
   7   6   1    0.04    0.52
  -7  -6  -1    0.07    0.43
  -7  -6  -1    0.24    0.45
  -7  -6  -1    0.53    0.40
  -7  -6  -1   -0.10    0.43
   7   7   1    6.36    0.85
   7   7   1    7.56    0.76
   7   7   1    5.61    0.99
   7   7   1    5.44    0.91
   7   7   1    5.55    1.20
   7   7   1    6.20    0.95
   7   7   1    5.91    0.86
   7   7   1    5.74    0.85
  -7  -7  -1    7.26    1.12
  -7  -7  -1    5.80    0.70
  -7  -7  -1    5.32    0.76
  -7  -7  -1    8.14    1.08
   7   8   1   -0.99    0.41
   7   8   1    0.02    0.53
   7   8   1   -0.63    0.77
   7   8   1   -0.49    0.59
   7   8   1    0.67    0.47
   7   8   1    0.21    0.47
   7   8   1    0.33    0.67
  -7  -8  -1   -0.36    0.50
  -7  -8  -1   -0.54    0.44
  -7  -8  -1   -0.74    0.53
  -7  -8  -1    0.83    0.71
   7   9   1    3.05    0.62
   7   9   1    3.13    0.54
   7   9   1    3.12    0.65
   7   9   1    2.53    0.75
   7   9   1    3.20    0.92
  -7  -9  -1    2.18    0.66
  -7  -9  -1    2.48    0.53
  -7  -9  -1    2.05    0.74
   7  10   1    0.07    0.77
   7  10   1    0.14    0.90
   7  10   1    0.60    0.60
   7  10   1    0.24    0.57
  -7 -10  -1    0.64    0.81
   7  11   1    1.24    0.91
   7  11   1   -0.04    0.71
   7  11   1    0.03    0.63
  -7 -11  -1    0.45    0.89
   7  12   1    0.13    0.81
   7  12   1   -0.10    0.74
   7  12   1   -0.15    1.00
  -7 -12  -1    0.82    0.73
  -7 -12  -1   -0.50    0.95
   7  13   1    2.38    0.90
   7  13   1    0.44    0.86
   7  13   1    3.17    1.17
  -7 -13  -1    2.34    1.06
  -7 -13  -1    0.92    0.74
   8 -16   1    0.75    0.94
   8 -16   1    0.60    0.49
  -8  16  -1    1.41    1.13
  -8  16  -1    0.85    0.44
   8 -15   1   -0.08    0.79
   8 -15   1    0.05    0.41
  -8  15  -1    0.38    0.38
  -8  15  -1   -0.85    0.67
  -8  15  -1    1.41    1.01
   8 -14   1    0.72    0.76
   8 -14   1    0.86    0.38
  -8  14  -1    0.86    0.35
  -8  14  -1    0.75    0.64
  -8  14  -1    0.79    0.87
   8 -13   1    0.60    0.32
   8 -13   1    1.41    0.69
  -8  13  -1    0.77    0.60
   8 -12   1    0.81    0.82
   8 -12   1    1.21    0.82
   8 -12   1    0.84    0.28
  -8  12  -1    0.46    0.56
  -8  12  -1    2.18    0.77
  -8  12  -1    0.73    0.25
  -8  12  -1    0.59    0.51
  -8  12  -1    0.97    0.28
   8 -11   1   -0.75    0.52
   8 -11   1    0.29    0.74
   8 -11   1    1.72    1.20
   8 -11   1    0.36    0.23
  -8  11  -1    0.49    0.22
  -8  11  -1   -0.03    0.49
  -8  11  -1    0.06    0.89
  -8  11  -1    0.88    0.67
   8 -10   1    3.03    0.82
   8 -10   1    1.21    0.55
   8 -10   1    1.96    0.71
   8 -10   1    1.29    0.24
  -8  10  -1    2.18    0.67
  -8  10  -1    1.94    0.25
  -8  10  -1    2.07    0.55
  -8  10  -1    1.44    0.54
   8  -9   1    1.17    0.70
   8  -9   1    0.91    0.19
   8  -9   1    1.57    0.64
  -8   9  -1    0.22    0.51
  -8   9  -1    0.65    0.50
   8  -8   1   16.48    1.16
   8  -8   1   14.95    1.40
   8  -8   1   15.73    1.65
   8  -8   1   17.23    1.53
  -8   8  -1   17.98    1.35
  -8   8  -1   16.88    1.46
  -8   8  -1   16.53    1.27
  -8   8  -1   15.33    1.38
   8  -7   1   10.24    1.34
   8  -7   1   10.28    1.04
   8  -7   1   10.47    1.16
   8  -7   1   11.63    0.79
  -8   7  -1   11.27    0.77
  -8   7  -1    9.35    0.75
  -8   7  -1   10.09    1.07
  -8   7  -1   10.42    0.88
  -8   7  -1   10.04    0.95
  -8   7  -1    9.80    1.01
   8  -6   1    8.74    0.90
   8  -6   1    7.78    0.81
   8  -6   1    7.36    1.06
   8  -6   1    6.97    0.99
   8  -6   1    7.48    0.59
  -8   6  -1    7.93    0.59
  -8   6  -1    7.63    0.89
  -8   6  -1    6.89    0.67
  -8   6  -1    6.08    0.75
  -8   6  -1    6.29    0.83
  -8   6  -1    6.90    0.56
   8  -5   1    6.67    0.54
   8  -5   1    6.82    0.79
   8  -5   1    6.57    0.98
   8  -5   1    6.46    0.88
   8  -5   1    6.58    0.60
   8  -5   1    7.04    0.73
  -8   5  -1    6.26    0.59
  -8   5  -1    6.32    0.53
  -8   5  -1    6.48    0.71
  -8   5  -1    6.34    0.53
  -8   5  -1    6.16    0.71
  -8   5  -1    6.11    0.60
   8  -4   1    5.07    0.58
   8  -4   1    3.79    0.75
   8  -4   1    3.65    0.51
   8  -4   1    4.98    0.63
   8  -4   1    4.12    0.45
  -8   4  -1    3.94    0.58
  -8   4  -1    4.03    0.60
  -8   4  -1    3.97    0.47
  -8   4  -1    4.47    0.43
  -8   4  -1    4.12    0.50
   8  -3   1    0.27    0.39
   8  -3   1    0.00    0.23
   8  -3   1   -0.30    0.39
   8  -3   1   -0.10    0.26
   8  -3   1   -0.17    0.21
  -8   3  -1    0.07    0.20
  -8   3  -1   -0.22    0.33
  -8   3  -1   -0.06    0.28
  -8   3  -1   -0.02    0.21
  -8   3  -1   -0.15    0.31
   8  -2   1   17.96    1.47
   8  -2   1   18.46    1.41
   8  -2   1   20.27    1.37
   8  -2   1   18.67    1.49
   8  -2   1   19.52    1.41
  -8   2  -1   19.30    1.36
  -8   2  -1   19.41    1.39
  -8   2  -1   19.75    1.44
  -8   2  -1   16.10    1.42
  -8   2  -1   18.92    1.58
  -8   2  -1   19.27    1.40
   8  -1   1    0.25    0.25
   8  -1   1    0.17    0.23
   8  -1   1    0.13    0.43
   8  -1   1    0.38    0.39
   8  -1   1    0.24    0.55
  -8   1  -1    0.01    0.36
  -8   1  -1    0.14    0.28
  -8   1  -1   -0.24    0.31
  -8   1  -1   -0.33    0.33
  -8   1  -1    0.66    0.23
  -8   1  -1    0.23    0.35
   8   0   1    1.59    0.32
   8   0   1    2.12    0.42
   8   0   1    1.86    0.49
   8   0   1    1.73    0.30
   8   0   1    0.92    0.29
  -8   0  -1    1.14    0.27
  -8   0  -1    1.66    0.39
  -8   0  -1    1.60    0.30
  -8   0  -1    1.54    0.43
  -8   0  -1    0.98    0.36
  -8   0  -1    1.39    0.42
   8   1   1    0.20    0.30
   8   1   1    0.48    0.30
   8   1   1    0.38    0.38
   8   1   1    0.60    0.46
   8   1   1    0.17    0.28
  -8  -1  -1    0.61    0.35
  -8  -1  -1    0.20    0.30
  -8  -1  -1    0.01    0.38
  -8  -1  -1    0.42    0.31
  -8  -1  -1    0.24    0.36
  -8  -1  -1    0.06    0.39
   8   2   1    9.23    0.97
   8   2   1    9.93    0.94
   8   2   1    9.58    0.98
   8   2   1    9.94    1.12
   8   2   1   11.14    0.92
  -8  -2  -1   10.64    0.94
  -8  -2  -1   11.54    1.16
  -8  -2  -1    8.62    0.94
  -8  -2  -1    9.14    0.91
  -8  -2  -1   10.88    0.97
   8   3   1    0.03    0.33
   8   3   1   -0.14    0.91
   8   3   1    0.02    0.35
   8   3   1    0.51    0.27
   8   3   1    0.23    0.35
   8   3   1    0.04    0.62
   8   3   1   -0.34    0.35
  -8  -3  -1    0.47    0.37
  -8  -3  -1   -0.58    0.39
  -8  -3  -1    0.20    0.35
  -8  -3  -1   -0.18    0.45
  -8  -3  -1    0.04    0.45
  -8  -3  -1   -0.05    0.39
   8   4   1   18.01    1.38
   8   4   1   16.59    1.35
   8   4   1   17.83    1.30
   8   4   1   15.90    1.44
   8   4   1   19.01    1.68
   8   4   1   16.41    1.42
   8   4   1   17.13    1.46
   8   4   1   17.10    1.44
  -8  -4  -1   17.45    1.39
  -8  -4  -1   17.67    1.60
  -8  -4  -1   19.02    1.48
  -8  -4  -1   17.24    1.36
  -8  -4  -1   14.09    1.36
  -8  -4  -1   14.52    1.44
   8   5   1    0.55    0.44
   8   5   1    1.22    0.36
   8   5   1    0.60    0.44
   8   5   1    1.34    0.47
   8   5   1    0.52    0.42
   8   5   1    1.04    0.51
   8   5   1    1.66    0.74
   8   5   1   -0.07    0.46
  -8  -5  -1    0.96    0.48
  -8  -5  -1    1.11    0.53
  -8  -5  -1   -0.20    0.46
  -8  -5  -1    0.82    0.45
  -8  -5  -1    1.22    0.57
   8   6   1   -0.92    0.42
   8   6   1   -1.52    0.71
   8   6   1   -0.33    0.40
   8   6   1   -0.20    0.53
   8   6   1    0.02    0.53
   8   6   1    0.19    0.42
   8   6   1   -0.21    0.39
   8   6   1   -0.21    0.46
  -8  -6  -1   -0.01    0.60
  -8  -6  -1   -0.10    0.53
  -8  -6  -1   -0.80    0.48
  -8  -6  -1   -0.61    0.43
   8   7   1   -0.25    0.78
   8   7   1    0.26    0.63
   8   7   1   -0.03    0.57
   8   7   1   -0.27    0.46
   8   7   1    0.20    0.43
   8   7   1   -0.11    0.47
   8   7   1   -0.17    0.57
   8   7   1    0.23    0.41
  -8  -7  -1   -0.37    0.51
  -8  -7  -1    0.71    0.68
  -8  -7  -1    0.54    0.57
  -8  -7  -1   -0.09    0.45
   8   8   1    1.87    0.52
   8   8   1    1.11    0.72
   8   8   1    0.66    0.71
   8   8   1   -0.26    0.50
   8   8   1    0.72    0.41
   8   8   1    0.57    0.56
   8   8   1    1.09    0.80
   8   8   1    0.76    0.58
  -8  -8  -1    0.94    0.52
  -8  -8  -1    1.09    0.76
  -8  -8  -1    0.96    0.65
  -8  -8  -1    0.31    0.69
   8   9   1    1.93    0.87
   8   9   1    1.30    0.67
   8   9   1    0.63    0.80
   8   9   1    1.93    0.68
  -8  -9  -1    0.96    0.70
  -8  -9  -1    1.25    0.59
  -8  -9  -1    1.93    0.84
   8  10   1    1.53    0.70
   8  10   1    2.09    0.89
   8  10   1    2.18    0.95
   8  10   1    1.54    0.68
  -8 -10  -1    0.26    0.63
  -8 -10  -1    1.64    0.91
   8  11   1    3.22    1.12
   8  11   1    2.61    0.77
   8  11   1    2.13    0.88
  -8 -11  -1    2.18    1.02
  -8 -11  -1    1.86    0.70
   8  12   1    1.12    1.13
   8  12   1    1.39    0.89
   8  12   1    1.33    0.83
  -8 -12  -1    1.00    0.71
  -8 -12  -1    1.11    1.04
   9 -15   1   -0.71    0.85
   9 -15   1    0.40    0.86
   9 -15   1    0.41    0.42
  -9  15  -1    0.36    0.40
  -9  15  -1    0.32    0.70
  -9  15  -1    0.24    0.95
   9 -14   1    0.60    0.80
   9 -14   1   -0.19    0.75
   9 -14   1    0.40    0.36
  -9  14  -1   -0.10    0.92
  -9  14  -1   -0.65    0.33
  -9  14  -1    0.02    0.64
   9 -13   1    1.39    0.73
   9 -13   1    1.14    0.72
   9 -13   1    1.12    0.33
  -9  13  -1    1.38    0.63
  -9  13  -1    0.70    0.85
  -9  13  -1    1.34    0.34
  -9  13  -1    1.05    0.31
  -9  13  -1    1.88    0.67
   9 -12   1   -1.53    0.59
   9 -12   1   -0.67    0.84
   9 -12   1   -0.34    0.63
   9 -12   1    0.26    0.28
  -9  12  -1    0.10    0.25
  -9  12  -1    0.20    0.26
  -9  12  -1   -0.02    0.73
  -9  12  -1   -0.72    0.59
  -9  12  -1   -0.16    0.56
   9 -11   1    1.61    0.63
   9 -11   1    1.52    0.56
   9 -11   1    1.59    0.79
   9 -11   1    1.46    0.27
  -9  11  -1    1.83    0.62
  -9  11  -1    2.13    0.76
  -9  11  -1    1.34    0.26
  -9  11  -1    1.65    0.28
  -9  11  -1    0.86    0.60
   9 -10   1    7.51    1.05
   9 -10   1    7.29    0.61
   9 -10   1    7.30    1.26
  -9  10  -1    6.66    0.59
  -9  10  -1    7.36    1.11
  -9  10  -1    6.57    0.98
  -9  10  -1    6.44    0.58
  -9  10  -1    7.55    0.98
   9  -9   1    7.75    1.63
   9  -9   1    7.35    0.99
   9  -9   1    7.76    1.19
   9  -9   1    7.86    0.62
  -9   9  -1    5.93    0.58
  -9   9  -1    6.63    0.91
  -9   9  -1    8.05    0.64
  -9   9  -1    7.69    1.14
  -9   9  -1    7.28    0.96
   9  -8   1   13.20    1.24
   9  -8   1   12.17    1.41
   9  -8   1   12.06    1.70
  -9   8  -1   14.40    1.21
  -9   8  -1   11.10    0.94
  -9   8  -1   13.74    1.74
  -9   8  -1   10.05    1.72
  -9   8  -1   13.18    1.05
  -9   8  -1   15.24    1.01
   9  -7   1   15.74    1.17
   9  -7   1   16.83    1.55
   9  -7   1   15.94    1.37
   9  -7   1   18.43    1.50
   9  -7   1   16.00    1.71
  -9   7  -1   14.26    1.15
  -9   7  -1   17.00    1.17
  -9   7  -1   15.69    1.39
  -9   7  -1   15.45    1.23
  -9   7  -1   16.75    1.39
   9  -6   1    6.23    0.60
   9  -6   1    6.44    1.02
   9  -6   1    6.40    1.22
   9  -6   1    6.05    0.57
   9  -6   1    6.85    0.80
   9  -6   1    7.93    0.88
  -9   6  -1    6.02    0.54
  -9   6  -1    5.96    0.76
  -9   6  -1    6.23    0.88
  -9   6  -1    6.21    0.65
  -9   6  -1    6.00    0.55
   9  -5   1   33.24    2.49
   9  -5   1   36.58    2.52
   9  -5   1   33.51    2.60
   9  -5   1   34.24    2.32
   9  -5   1   33.26    2.34
   9  -5   1   35.38    2.40
  -9   5  -1   30.35    2.42
  -9   5  -1   32.36    2.31
  -9   5  -1   33.24    2.34
  -9   5  -1   31.60    2.42
  -9   5  -1   34.02    2.34
  -9   5  -1   32.26    2.31
   9  -4   1    2.48    0.34
   9  -4   1    2.83    0.41
   9  -4   1    2.65    0.57
   9  -4   1    2.18    0.35
   9  -4   1    1.97    0.56
  -9   4  -1    2.84    0.33
  -9   4  -1    3.25    0.40
  -9   4  -1    2.49    0.52
  -9   4  -1    1.57    0.50
  -9   4  -1    2.03    0.33
   9  -3   1    9.49    1.06
   9  -3   1   10.08    0.86
   9  -3   1   10.54    1.08
   9  -3   1   10.39    0.90
   9  -3   1   10.31    0.91
  -9   3  -1   11.21    0.89
  -9   3  -1   10.03    0.96
  -9   3  -1   10.76    0.85
  -9   3  -1    9.85    1.01
  -9   3  -1   10.32    0.91
   9  -2   1    0.59    0.52
   9  -2   1    1.05    0.29
   9  -2   1    0.87    0.31
   9  -2   1    0.65    0.47
  -9   2  -1    0.93    0.29
  -9   2  -1    1.04    0.45
  -9   2  -1    0.81    0.38
  -9   2  -1    1.05    0.29
  -9   2  -1    0.46    0.45
  -9   2  -1    0.12    0.45
   9  -1   1   31.37    2.38
   9  -1   1   33.88    2.35
   9  -1   1   31.82    2.53
   9  -1   1   32.18    2.26
  -9   1  -1   29.51    2.31
  -9   1  -1   31.36    2.25
  -9   1  -1   32.80    2.35
  -9   1  -1   32.82    2.34
  -9   1  -1   30.96    2.46
  -9   1  -1   31.51    2.28
   9   0   1   25.28    1.93
   9   0   1   25.66    2.02
   9   0   1   26.58    1.89
   9   0   1   25.73    1.94
  -9   0  -1   26.98    1.95
  -9   0  -1   25.55    1.92
  -9   0  -1   25.70    1.88
  -9   0  -1   25.02    2.12
  -9   0  -1   26.43    1.96
   9   1   1    0.48    0.36
   9   1   1    1.27    0.62
   9   1   1    0.99    0.46
  -9  -1  -1   -0.07    0.41
  -9  -1  -1   -0.36    0.42
  -9  -1  -1    0.40    0.36
  -9  -1  -1    0.64    0.46
  -9  -1  -1   -0.41    0.33
  -9  -1  -1    0.52    0.40
   9   2   1    8.00    1.12
   9   2   1    9.61    1.52
   9   2   1    6.92    0.93
   9   2   1    8.52    0.84
  -9  -2  -1    8.06    1.17
  -9  -2  -1    8.21    0.87
  -9  -2  -1    7.66    0.91
  -9  -2  -1   10.12    0.95
  -9  -2  -1    6.01    0.86
  -9  -2  -1    8.79    0.92
   9   3   1    5.35    0.57
   9   3   1    4.64    0.67
   9   3   1    4.98    0.77
   9   3   1    5.69    0.59
   9   3   1    3.78    0.92
   9   3   1    2.96    0.56
  -9  -3  -1    5.90    0.74
  -9  -3  -1    4.61    0.65
  -9  -3  -1    4.15    0.69
  -9  -3  -1    4.29    0.59
  -9  -3  -1    6.17    0.88
  -9  -3  -1    4.02    0.55
   9   4   1    8.39    1.12
   9   4   1    9.74    1.01
   9   4   1    9.29    1.01
   9   4   1   10.00    0.85
   9   4   1    9.09    1.07
   9   4   1   10.76    1.28
  -9  -4  -1   10.56    1.08
  -9  -4  -1    9.79    1.34
  -9  -4  -1   10.42    1.11
  -9  -4  -1    7.98    0.97
  -9  -4  -1    9.10    0.99
  -9  -4  -1    8.25    1.01
   9   5   1    1.96    0.54
   9   5   1    2.66    0.43
   9   5   1    2.26    0.83
   9   5   1    2.18    0.54
   9   5   1    2.39    0.60
   9   5   1    2.80    0.53
   9   5   1    1.33    0.81
  -9  -5  -1    2.86    0.69
  -9  -5  -1    2.27    0.55
  -9  -5  -1    2.43    0.63
  -9  -5  -1    1.87    0.57
  -9  -5  -1    2.50    0.58
   9   6   1    1.46    0.57
   9   6   1    0.84    0.81
   9   6   1    1.25    0.44
   9   6   1    1.44    0.49
   9   6   1    2.21    0.65
   9   6   1    1.47    0.58
   9   6   1    1.49    0.52
  -9  -6  -1    1.22    0.56
  -9  -6  -1    1.31    0.54
  -9  -6  -1    1.04    0.62
  -9  -6  -1    0.34    0.56
  -9  -6  -1    0.89    0.69
   9   7   1    0.05    0.61
   9   7   1   -0.91    0.43
   9   7   1    0.36    0.67
   9   7   1   -0.44    0.45
   9   7   1   -0.66    0.58
   9   7   1   -0.66    0.50
   9   7   1   -0.21    0.81
  -9  -7  -1   -0.83    0.62
  -9  -7  -1    0.37    0.58
  -9  -7  -1   -0.49    0.62
  -9  -7  -1   -1.03    0.70
   9   8   1    1.13    0.76
   9   8   1    0.86    0.56
   9   8   1   -0.13    0.49
   9   8   1   -0.45    0.54
   9   8   1    0.26    0.85
   9   8   1    0.43    0.73
   9   8   1    0.68    0.77
  -9  -8  -1    0.67    0.64
  -9  -8  -1    0.06    0.80
  -9  -8  -1   -0.26    0.74
   9   9   1   -0.12    0.91
   9   9   1   -0.35    0.79
   9   9   1    0.07    0.84
   9   9   1    0.76    1.03
  -9  -9  -1    0.04    0.61
  -9  -9  -1    0.27    0.90
   9  10   1    0.04    0.86
   9  10   1   -1.13    1.04
   9  10   1   -0.11    0.69
  -9 -10  -1    0.26    0.68
  -9 -10  -1   -1.27    0.94
   9  11   1    0.67    1.20
   9  11   1    0.43    1.11
   9  11   1    0.26    0.80
  -9 -11  -1    0.65    0.71
  -9 -11  -1    0.82    1.11
  10 -15   1    1.68    0.94
  10 -15   1   -1.00    1.42
  10 -15   1    1.03    0.43
 -10  15  -1    0.78    0.38
 -10  15  -1    0.78    0.76
 -10  15  -1    1.01    1.09
  10 -14   1   -0.05    0.37
  10 -14   1    0.29    0.79
  10 -14   1   -0.66    0.82
 -10  14  -1    0.42    0.33
 -10  14  -1   -0.52    0.99
 -10  14  -1   -0.15    0.96
 -10  14  -1   -0.60    0.70
  10 -13   1    0.19    0.34
  10 -13   1    0.05    0.73
  10 -13   1   -0.23    0.70
 -10  13  -1   -0.36    0.87
 -10  13  -1   -0.19    0.31
 -10  13  -1    0.34    0.29
 -10  13  -1   -0.64    0.69
 -10  13  -1   -1.23    0.63
  10 -12   1    1.83    0.70
  10 -12   1    3.40    0.78
  10 -12   1    2.25    0.36
 -10  12  -1    2.19    0.33
 -10  12  -1    2.45    0.69
 -10  12  -1    2.45    0.82
 -10  12  -1    1.81    0.70
 -10  12  -1    2.10    0.34
  10 -11   1    1.07    0.31
  10 -11   1    1.13    0.59
  10 -11   1    0.46    0.86
  10 -11   1    1.21    0.64
 -10  11  -1    1.26    0.30
 -10  11  -1    1.29    0.29
 -10  11  -1    1.25    0.62
 -10  11  -1   -0.28    0.60
 -10  11  -1    0.46    0.73
  10 -10   1    3.29    0.39
  10 -10   1    3.65    0.69
  10 -10   1    2.96    0.87
 -10  10  -1    2.65    0.34
 -10  10  -1    2.90    0.73
 -10  10  -1    2.52    0.66
 -10  10  -1    3.40    0.36
 -10  10  -1    3.41    0.68
  10  -9   1   10.17    0.79
  10  -9   1    8.92    1.16
  10  -9   1    8.35    1.37
 -10   9  -1    8.83    1.19
 -10   9  -1   10.45    1.08
 -10   9  -1    9.50    0.87
 -10   9  -1   10.85    0.79
 -10   9  -1    9.73    1.13
 -10   9  -1    8.11    0.74
  10  -8   1    0.18    0.65
  10  -8   1    0.67    0.27
  10  -8   1    0.55    0.50
 -10   8  -1    1.24    0.56
 -10   8  -1    0.43    0.21
 -10   8  -1    0.20    0.37
 -10   8  -1    1.00    0.69
 -10   8  -1    0.74    0.25
  10  -7   1    6.87    1.14
  10  -7   1    7.31    0.91
  10  -7   1    7.30    0.64
 -10   7  -1    6.14    0.60
 -10   7  -1    6.83    0.61
 -10   7  -1    7.81    0.90
 -10   7  -1    7.42    0.71
  10  -6   1   35.97    2.89
  10  -6   1   37.29    2.55
  10  -6   1   41.17    2.66
  10  -6   1   36.11    2.55
  10  -6   1   40.83    2.78
 -10   6  -1   30.73    2.96
 -10   6  -1   36.46    2.56
 -10   6  -1   34.79    2.54
 -10   6  -1   34.23    2.53
 -10   6  -1   36.57    2.68
  10  -5   1    3.20    0.67
  10  -5   1    4.10    0.62
  10  -5   1    4.40    0.78
  10  -5   1    4.81    0.73
  10  -5   1    5.56    0.99
  10  -5   1    3.64    0.42
 -10   5  -1    4.24    0.74
 -10   5  -1    4.00    0.42
 -10   5  -1    2.74    0.39
 -10   5  -1    3.65    0.70
  10  -4   1    0.19    0.57
  10  -4   1   -0.13    0.30
  10  -4   1   -0.09    0.36
  10  -4   1   -0.04    0.55
 -10   4  -1   -0.01    0.55
 -10   4  -1    0.26    0.28
 -10   4  -1    0.78    0.37
  10  -3   1   -0.61    0.31
  10  -3   1    0.02    0.53
  10  -3   1    0.15    0.35
  10  -3   1    0.23    0.57
  10  -3   1   -0.74    0.31
 -10   3  -1   -0.17    0.36
 -10   3  -1   -0.69    0.48
 -10   3  -1   -0.12    0.38
 -10   3  -1   -0.17    0.30
 -10   3  -1   -0.62    0.43
  10  -2   1    2.98    0.46
  10  -2   1    3.60    0.69
  10  -2   1    3.99    0.45
 -10   2  -1    3.12    0.64
 -10   2  -1    3.59    0.63
 -10   2  -1    3.77    0.43
 -10   2  -1    3.74    0.53
 -10   2  -1    3.49    0.44
  10  -1   1   18.40    1.48
  10  -1   1   20.71    1.65
  10  -1   1   24.63    1.92
 -10   1  -1   19.85    1.57
 -10   1  -1   16.68    1.48
 -10   1  -1   17.94    1.60
 -10   1  -1   19.22    1.59
 -10   1  -1   18.66    1.77
 -10   1  -1   19.89    1.46
  10   0   1   15.95    1.40
  10   0   1   15.68    1.34
 -10   0  -1   16.13    1.41
 -10   0  -1   19.28    1.37
 -10   0  -1   15.38    1.33
 -10   0  -1   17.07    1.68
  10   1   1    0.88    0.63
  10   1   1    0.32    0.37
  10   1   1   -0.20    0.38
  10   1   1    0.61    0.50
 -10  -1  -1   -0.65    0.52
 -10  -1  -1   -0.83    0.46
 -10  -1  -1   -0.32    0.37
 -10  -1  -1   -0.01    0.38
 -10  -1  -1    0.08    0.47
  10   2   1    1.80    0.56
  10   2   1    3.57    0.78
  10   2   1    0.56    0.45
 -10  -2  -1    1.39    0.62
 -10  -2  -1    0.56    0.81
 -10  -2  -1    1.36    0.44
 -10  -2  -1    1.99    0.44
 -10  -2  -1    1.01    0.51
 -10  -2  -1    2.19    0.54
  10   3   1   15.92    1.58
  10   3   1   16.90    1.36
  10   3   1   16.73    1.43
  10   3   1   15.09    1.46
 -10  -3  -1   17.44    1.68
 -10  -3  -1   12.79    1.35
 -10  -3  -1   15.17    1.38
 -10  -3  -1   16.14    1.40
 -10  -3  -1   14.53    1.38
 -10  -3  -1   14.48    1.30
  10   4   1    1.30    0.78
  10   4   1    0.82    0.46
  10   4   1    1.22    0.57
  10   4   1    0.92    0.33
  10   4   1    0.67    0.58
  10   4   1    0.58    0.46
 -10  -4  -1    0.35    0.40
 -10  -4  -1    0.27    0.46
 -10  -4  -1    0.08    0.52
 -10  -4  -1    0.61    0.50
 -10  -4  -1    0.96    0.61
 -10  -4  -1    0.78    0.66
 -10  -4  -1   -0.07    0.47
  10   5   1    8.88    1.48
  10   5   1   13.01    1.39
  10   5   1   12.15    1.27
  10   5   1   11.76    1.18
  10   5   1   11.47    1.04
 -10  -5  -1   10.74    1.10
 -10  -5  -1   13.36    1.66
 -10  -5  -1   12.30    1.31
 -10  -5  -1   11.08    1.24
 -10  -5  -1   11.35    1.17
 -10  -5  -1   11.22    1.21
  10   6   1    3.89    0.62
  10   6   1    3.70    0.75
  10   6   1    3.59    0.64
  10   6   1    2.80    0.73
  10   6   1    3.99    0.96
  10   6   1    2.95    0.53
 -10  -6  -1    3.58    0.83
 -10  -6  -1    2.31    0.73
 -10  -6  -1    3.11    0.67
 -10  -6  -1    2.60    0.61
 -10  -6  -1    3.61    0.84
 -10  -6  -1    2.26    0.67
  10   7   1    0.81    0.75
  10   7   1   -0.92    0.84
  10   7   1    0.58    0.50
  10   7   1   -0.30    0.71
  10   7   1   -0.07    0.55
  10   7   1    0.77    0.59
 -10  -7  -1    0.61    0.78
 -10  -7  -1   -0.06    0.67
 -10  -7  -1   -0.10    0.59
 -10  -7  -1    0.41    0.77
 -10  -7  -1    0.01    0.91
  10   8   1    3.39    1.05
  10   8   1    4.65    1.05
  10   8   1    3.83    0.97
 -10  -8  -1    6.00    1.00
 -10  -8  -1    4.23    1.01
 -10  -8  -1    4.59    0.79
  10   9   1    2.30    1.08
  10   9   1    4.39    1.07
 -10  -9  -1    1.99    0.76
 -10  -9  -1    3.05    1.07
  10  10   1    0.14    1.10
 -10 -10  -1    1.61    1.10
  11 -14   1    0.06    0.85
  11 -14   1    0.65    0.41
 -11  14  -1   -0.12    0.37
 -11  14  -1    0.43    0.97
 -11  14  -1    0.54    0.74
 -11  14  -1   -0.30    0.65
  11 -13   1    2.86    0.46
  11 -13   1    2.19    0.85
 -11  13  -1    3.35    0.77
 -11  13  -1    3.02    0.95
 -11  13  -1    2.52    0.42
 -11  13  -1    3.23    0.81
  11 -12   1    0.59    0.73
  11 -12   1    0.98    0.37
  11 -12   1    2.29    0.70
 -11  12  -1    2.81    0.91
 -11  12  -1    1.29    0.34
 -11  12  -1    1.45    0.36
 -11  12  -1    1.19    0.71
 -11  12  -1    0.95    0.71
  11 -11   1    6.53    0.93
  11 -11   1    4.80    1.11
  11 -11   1    4.45    0.80
  11 -11   1    4.27    0.60
 -11  11  -1    4.80    0.81
 -11  11  -1    5.40    0.85
 -11  11  -1    4.46    0.61
 -11  11  -1    3.82    0.58
 -11  11  -1    5.32    0.97
  11 -10   1    8.89    0.79
  11 -10   1    8.96    1.51
  11 -10   1    9.32    1.23
 -11  10  -1    9.74    1.16
 -11  10  -1    8.20    0.77
 -11  10  -1    9.89    0.80
 -11  10  -1    9.34    1.20
  11  -9   1   -0.41    0.28
  11  -9   1   -0.32    0.76
 -11   9  -1   -0.27    0.21
 -11   9  -1   -0.59    0.38
 -11   9  -1   -0.06    0.25
 -11   9  -1    0.62    0.63
 -11   9  -1   -0.71    0.61
  11  -8   1   10.04    1.11
  11  -8   1    9.13    0.77
  11  -8   1    7.24    1.34
  11  -8   1    8.24    1.27
 -11   8  -1    8.40    0.73
 -11   8  -1    9.28    1.01
 -11   8  -1    8.70    0.79
 -11   8  -1    7.75    0.71
 -11   8  -1    9.09    1.14
  11  -7   1   10.21    0.84
  11  -7   1    9.05    1.35
  11  -7   1   10.21    1.10
  11  -7   1   11.02    1.35
 -11   7  -1    9.03    0.81
 -11   7  -1   11.53    1.15
 -11   7  -1    9.93    0.86
 -11   7  -1    7.72    0.77
 -11   7  -1   10.86    1.19
  11  -6   1   27.25    1.95
  11  -6   1   23.25    1.83
  11  -6   1   26.68    2.11
  11  -6   1   26.07    2.11
  11  -6   1   26.24    1.84
 -11   6  -1   23.17    1.95
 -11   6  -1   22.22    1.79
 -11   6  -1   26.26    1.82
 -11   6  -1   26.19    1.83
 -11   6  -1   26.04    1.99
  11  -5   1    0.52    0.62
  11  -5   1   -0.74    0.41
  11  -5   1    0.73    0.33
  11  -5   1   -0.59    0.59
  11  -5   1    0.17    0.31
 -11   5  -1    0.37    0.30
 -11   5  -1    0.75    0.36
 -11   5  -1    0.44    0.31
 -11   5  -1    0.61    0.58
 -11   5  -1    0.87    0.53
  11  -4   1    0.35    0.37
  11  -4   1    0.91    0.35
  11  -4   1    0.22    0.60
  11  -4   1    0.99    0.66
  11  -4   1    1.08    0.34
 -11   4  -1    1.31    0.35
 -11   4  -1    1.31    0.55
 -11   4  -1    1.19    0.40
 -11   4  -1    1.02    0.58
 -11   4  -1    0.78    0.32
  11  -3   1   -0.06    0.36
  11  -3   1   -0.58    0.56
  11  -3   1    0.97    0.65
  11  -3   1   -0.25    0.33
 -11   3  -1    0.16    0.32
 -11   3  -1   -0.43    0.47
 -11   3  -1   -0.65    0.52
 -11   3  -1   -0.42    0.43
 -11   3  -1    0.26    0.32
  11  -2   1    0.76    0.67
  11  -2   1   -0.11    0.55
  11  -2   1    0.43    0.39
  11  -2   1    0.34    0.34
 -11   2  -1   -0.64    0.46
 -11   2  -1    0.03    0.33
 -11   2  -1    0.45    0.32
 -11   2  -1   -0.89    0.51
  11  -1   1    0.88    0.65
  11  -1   1    0.73    0.53
  11  -1   1    0.55    0.61
  11  -1   1    0.44    0.39
 -11   1  -1    0.31    0.37
 -11   1  -1   -0.63    0.57
 -11   1  -1   -0.44    0.35
 -11   1  -1   -0.93    0.51
 -11   1  -1    0.21    0.43
  11   0   1   10.66    1.08
 -11   0  -1    8.14    1.09
 -11   0  -1    9.61    1.70
 -11   0  -1    9.83    0.99
 -11   0  -1    8.91    1.07
  11   1   1    2.16    0.49
  11   1   1    0.90    0.49
  11   1   1    2.94    0.59
  11   1   1    2.24    0.77
 -11  -1  -1    1.53    0.81
 -11  -1  -1    1.18    0.55
 -11  -1  -1    1.56    0.43
 -11  -1  -1    1.94    0.56
 -11  -1  -1    2.88    0.57
 -11  -1  -1    1.76    0.47
  11   2   1    4.99    0.92
  11   2   1    6.83    0.98
  11   2   1    6.25    0.67
  11   2   1    2.42    0.62
 -11  -2  -1    3.71    0.62
 -11  -2  -1    4.02    0.60
 -11  -2  -1    4.14    0.67
 -11  -2  -1    4.68    0.68
 -11  -2  -1    4.33    0.69
 -11  -2  -1    5.17    1.05
  11   3   1    0.16    0.59
  11   3   1    0.72    0.79
  11   3   1    0.99    0.61
  11   3   1   -0.51    0.52
 -11  -3  -1   -0.14    0.57
 -11  -3  -1   -0.24    0.61
 -11  -3  -1   -0.14    0.47
 -11  -3  -1    0.44    1.12
 -11  -3  -1    0.24    0.58
 -11  -3  -1   -0.44    0.45
  11   4   1    6.69    1.07
  11   4   1    5.99    1.02
  11   4   1    6.01    0.94
 -11  -4  -1    6.22    1.03
 -11  -4  -1    7.15    0.99
 -11  -4  -1    5.25    0.83
  11   5   1    0.68    0.86
  11   5   1    2.13    0.71
  11   5   1    0.93    1.07
 -11  -5  -1    0.92    0.62
 -11  -5  -1    1.16    0.71
  11   6   1    0.58    0.73
  11   6   1   -0.03    0.62
  11   6   1    0.37    0.93
  11   6   1    0.67    0.76
 -11  -6  -1    0.17    0.71
 -11  -6  -1    0.29    0.60
 -11  -6  -1    0.57    0.77
  11   7   1    4.89    0.70
  11   7   1    4.36    1.00
  11   7   1    4.35    1.06
  11   7   1    3.47    0.72
 -11  -7  -1    4.45    1.00
 -11  -7  -1    3.28    0.85
 -11  -7  -1    3.46    0.80
  11   8   1    4.50    1.18
  11   8   1    4.26    1.12
 -11  -8  -1    4.23    1.08
 -11  -8  -1    4.55    0.86
  11   9   1    2.10    1.16
 -11  -9  -1    2.38    0.85
 -11  -9  -1    2.34    1.08
  12 -14   1    0.27    0.42
  12 -14   1   -0.04    0.89
 -12  14  -1   -0.01    0.42
 -12  14  -1    0.28    0.99
 -12  14  -1   -0.51    0.79
 -12  14  -1   -1.24    0.76
  12 -13   1    2.09    0.88
  12 -13   1    1.91    0.42
 -12  13  -1    2.53    0.88
 -12  13  -1    1.92    0.75
 -12  13  -1    2.03    0.43
 -12  13  -1    1.58    1.04
  12 -12   1    1.82    0.85
  12 -12   1    1.21    0.39
 -12  12  -1    1.14    0.82
 -12  12  -1    1.97    0.38
 -12  12  -1    1.56    0.84
  12 -11   1    6.35    0.94
  12 -11   1    6.37    0.72
 -12  11  -1    5.97    0.65
 -12  11  -1    8.16    0.71
 -12  11  -1    8.30    1.25
  12 -10   1    1.90    0.72
  12 -10   1    1.22    0.99
  12 -10   1    2.09    0.38
 -12  10  -1    2.19    0.36
 -12  10  -1    2.72    0.35
 -12  10  -1    2.54    0.76
 -12  10  -1    2.41    0.80
  12  -9   1    0.30    0.87
  12  -9   1    0.52    0.88
  12  -9   1    1.93    0.85
  12  -9   1    1.15    0.35
 -12   9  -1    1.28    0.64
 -12   9  -1    1.61    0.42
 -12   9  -1    1.25    0.28
 -12   9  -1    2.19    0.69
 -12   9  -1    1.37    0.32
  12  -8   1    6.90    0.72
  12  -8   1    6.84    0.99
  12  -8   1    5.33    1.01
  12  -8   1    6.81    1.11
 -12   8  -1    5.05    0.63
 -12   8  -1    6.70    1.13
 -12   8  -1    8.06    1.08
 -12   8  -1    6.59    0.67
 -12   8  -1    6.98    0.71
  12  -7   1   -0.02    0.68
  12  -7   1   -0.86    0.55
  12  -7   1   -0.31    0.35
  12  -7   1   -0.42    0.76
 -12   7  -1   -0.03    0.61
 -12   7  -1    0.25    0.35
 -12   7  -1   -0.33    0.32
 -12   7  -1    0.22    0.65
  12  -6   1    8.64    1.10
  12  -6   1    8.37    0.90
  12  -6   1    9.15    1.30
  12  -6   1    9.91    0.94
 -12   6  -1   10.07    1.07
 -12   6  -1    9.31    0.87
 -12   6  -1    8.31    1.20
 -12   6  -1   10.03    0.85
  12  -5   1    0.84    0.38
  12  -5   1    0.29    0.35
  12  -5   1   -0.96    0.44
  12  -5   1   -0.84    0.70
  12  -5   1    0.01    0.71
 -12   5  -1    0.35    0.58
 -12   5  -1    0.95    0.36
 -12   5  -1    0.52    0.34
 -12   5  -1    0.38    0.36
 -12   5  -1    0.06    0.60
  12  -4   1    3.84    0.78
  12  -4   1    1.86    0.74
  12  -4   1    3.16    0.49
 -12   4  -1    5.53    0.70
 -12   4  -1    3.28    0.47
 -12   4  -1    3.70    0.47
 -12   4  -1    4.25    0.70
 -12   4  -1    4.18    0.74
  12  -3   1   -0.29    0.36
  12  -3   1   -0.64    0.62
  12  -3   1   -1.22    0.70
  12  -3   1   -0.26    0.40
 -12   3  -1    0.37    0.46
 -12   3  -1    0.11    0.53
 -12   3  -1   -0.20    0.35
 -12   3  -1   -0.99    0.58
 -12   3  -1    0.34    0.34
  12  -2   1    4.48    0.82
  12  -2   1    2.57    0.52
  12  -2   1    3.50    0.66
 -12   2  -1    2.72    0.63
 -12   2  -1    4.15    0.59
 -12   2  -1    3.65    0.49
 -12   2  -1    1.85    0.66
 -12   2  -1    2.33    0.45
  12  -1   1    3.10    0.80
  12  -1   1    2.00    0.49
  12  -1   1    2.12    0.62
 -12   1  -1    2.03    0.47
 -12   1  -1    1.29    0.57
 -12   1  -1    1.48    0.64
 -12   1  -1    1.64    0.45
 -12   1  -1    2.30    0.55
  12   0   1    8.16    1.40
  12   0   1    8.15    0.98
  12   0   1    7.98    1.07
 -12   0  -1    9.71    1.02
 -12   0  -1    7.51    1.08
 -12   0  -1    6.13    0.95
  12   1   1    0.94    0.51
  12   1   1    0.93    0.61
  12   1   1    1.51    0.82
 -12  -1  -1    0.05    0.46
 -12  -1  -1   -0.30    0.54
 -12  -1  -1   -0.18    0.55
 -12  -1  -1   -0.86    0.55
 -12  -1  -1    0.66    0.53
  12   2   1    2.78    0.71
  12   2   1    1.88    0.89
  12   2   1    1.31    0.54
 -12  -2  -1    0.33    0.51
 -12  -2  -1    0.96    0.60
 -12  -2  -1    1.81    0.60
 -12  -2  -1    1.70    0.60
  12   3   1    0.72    0.56
  12   3   1    0.80    0.92
 -12  -3  -1    0.42    0.66
 -12  -3  -1    0.99    0.55
 -12  -3  -1    0.85    0.61
 -12  -3  -1    0.52    0.61
  12   4   1    9.87    1.24
  12   4   1    6.36    1.18
  12   4   1    7.14    0.93
 -12  -4  -1    8.03    1.14
 -12  -4  -1    8.43    1.23
 -12  -4  -1    9.95    1.27
  12   5   1    2.39    0.82
  12   5   1   -0.46    0.96
  12   5   1    0.16    0.68
 -12  -5  -1    0.86    0.72
 -12  -5  -1    1.39    0.69
 -12  -5  -1    0.87    0.73
  12   6   1   -0.44    0.62
  12   6   1   -0.38    0.68
  12   6   1    1.36    0.93
  12   6   1    1.06    1.02
 -12  -6  -1    0.33    0.80
 -12  -6  -1    0.15    0.71
 -12  -6  -1    0.60    0.78
  12   7   1    1.18    1.08
  12   7   1    0.69    0.78
 -12  -7  -1    0.86    0.94
 -12  -7  -1    0.90    0.77
  12   8   1   -0.34    1.10
 -12  -8  -1    0.96    0.87
 -12  -8  -1   -0.42    1.02
  13 -13   1    0.61    0.91
  13 -13   1    0.82    0.41
 -13  13  -1    0.83    0.37
 -13  13  -1    0.24    0.85
 -13  13  -1    1.07    0.88
  13 -12   1   -0.57    0.80
  13 -12   1   -0.53    0.38
 -13  12  -1    0.16    0.34
 -13  12  -1   -0.22    0.81
 -13  12  -1   -1.38    0.76
  13 -11   1    2.15    0.44
  13 -11   1    1.66    0.91
  13 -11   1    2.67    1.08
 -13  11  -1    3.28    0.40
 -13  11  -1    2.11    0.86
 -13  11  -1    2.13    0.87
  13 -10   1   -0.82    0.78
  13 -10   1   -1.00    0.88
  13 -10   1    0.02    0.37
 -13  10  -1   -0.46    0.75
 -13  10  -1    0.36    0.76
 -13  10  -1    0.27    0.34
  13  -9   1    5.69    1.10
  13  -9   1    6.12    0.78
  13  -9   1    4.11    1.15
  13  -9   1    6.82    1.34
 -13   9  -1    6.05    0.95
 -13   9  -1    6.57    0.72
 -13   9  -1    6.58    1.00
  13  -8   1   -1.45    0.88
  13  -8   1    0.31    0.39
  13  -8   1    1.15    0.81
 -13   8  -1    0.45    0.36
 -13   8  -1   -0.32    0.71
 -13   8  -1    0.49    0.71
  13  -7   1    5.01    0.80
  13  -7   1    6.53    0.99
  13  -7   1    5.78    0.80
 -13   7  -1    7.41    0.98
 -13   7  -1    6.01    1.00
 -13   7  -1    6.98    0.75
 -13   7  -1    6.58    0.70
  13  -6   1   -0.15    0.75
  13  -6   1    0.50    0.38
  13  -6   1   -1.29    0.68
 -13   6  -1    0.75    0.37
 -13   6  -1    0.97    0.37
 -13   6  -1    0.12    0.62
 -13   6  -1    0.36    0.69
  13  -5   1    4.04    0.94
  13  -5   1    6.55    0.96
  13  -5   1    5.72    0.77
 -13   5  -1    5.18    0.76
 -13   5  -1    6.52    0.94
 -13   5  -1    6.31    0.88
  13  -4   1    2.12    0.84
  13  -4   1    0.46    0.76
  13  -4   1    2.30    0.45
 -13   4  -1    1.90    0.67
 -13   4  -1    2.11    0.42
 -13   4  -1    1.87    0.71
 -13   4  -1    3.22    0.51
  13  -3   1    6.62    0.79
  13  -3   1    5.19    0.96
  13  -3   1    3.53    0.81
 -13   3  -1    5.93    0.78
 -13   3  -1    3.67    0.82
 -13   3  -1    5.29    0.84
  13  -2   1    7.55    0.92
  13  -2   1    5.66    1.05
  13  -2   1    8.33    1.19
 -13   2  -1    8.61    1.12
 -13   2  -1    6.30    0.92
 -13   2  -1    6.61    0.91
  13  -1   1    9.19    1.16
  13  -1   1    6.75    1.02
  13  -1   1    9.89    1.40
 -13   1  -1    7.67    1.01
 -13   1  -1   10.00    1.18
 -13   1  -1    9.77    1.02
 -13   1  -1    6.35    1.13
  13   0   1    1.55    0.53
  13   0   1    1.80    0.89
 -13   0  -1    1.01    0.66
 -13   0  -1    0.90    0.62
 -13   0  -1    1.04    0.51
  13   1   1    1.49    0.56
  13   1   1    1.04    0.90
 -13  -1  -1    1.19    0.56
 -13  -1  -1    2.11    0.64
 -13  -1  -1    1.01    0.70
 -13  -1  -1    0.57    0.65
  13   2   1    1.50    1.01
  13   2   1    1.89    0.60
  13   2   1    3.02    0.76
 -13  -2  -1    0.71    0.67
 -13  -2  -1    1.21    0.57
 -13  -2  -1    0.84    0.70
 -13  -2  -1    1.90    0.68
  13   3   1    0.17    0.99
  13   3   1    1.92    0.93
  13   3   1    1.56    0.60
 -13  -3  -1    2.34    0.75
 -13  -3  -1   -0.13    0.70
 -13  -3  -1    0.51    0.74
 -13  -3  -1    0.87    0.60
  13   4   1    9.74    1.39
  13   4   1   10.56    1.70
 -13  -4  -1   12.32    1.41
 -13  -4  -1    9.94    1.34
 -13  -4  -1   10.54    1.45
  13   5   1   -0.64    0.74
  13   5   1    0.32    1.04
 -13  -5  -1    0.35    0.77
 -13  -5  -1    1.00    0.81
 -13  -5  -1   -0.08    0.73
  13   6   1    3.28    1.17
  13   6   1    3.03    0.79
  13   6   1    4.50    0.78
 -13  -6  -1    3.02    0.89
 -13  -6  -1    3.72    1.05
 -13  -6  -1    2.38    0.87
  13   7   1    1.28    1.15
 -13  -7  -1    0.96    1.01
 -13  -7  -1    0.42    0.91
  14 -12   1   -0.12    0.46
  14 -12   1   -2.25    0.99
  14 -12   1    0.05    1.17
 -14  12  -1    0.17    0.41
 -14  12  -1   -0.87    0.92
 -14  12  -1    0.81    0.90
  14 -11   1   -0.92    0.45
  14 -11   1   -2.07    0.88
  14 -11   1    1.11    1.02
 -14  11  -1   -0.08    0.39
 -14  11  -1    0.00    0.87
 -14  11  -1   -1.11    0.88
  14 -10   1   -0.39    0.94
  14 -10   1   -0.56    0.46
  14 -10   1   -0.34    0.92
 -14  10  -1   -0.56    0.81
 -14  10  -1   -0.24    0.41
 -14  10  -1   -1.28    0.78
  14  -9   1    2.09    0.49
  14  -9   1   -0.29    1.13
  14  -9   1    2.47    1.01
 -14   9  -1    1.77    0.78
 -14   9  -1    1.48    0.86
 -14   9  -1    1.69    0.43
  14  -8   1   -0.69    0.43
  14  -8   1    0.08    0.85
 -14   8  -1   -0.23    0.76
 -14   8  -1   -0.23    0.41
 -14   8  -1   -0.02    0.80
  14  -7   1   -0.24    0.82
  14  -7   1    0.11    0.41
 -14   7  -1   -0.92    0.74
 -14   7  -1   -0.46    0.40
 -14   7  -1    0.08    0.74
  14  -6   1   -0.56    0.77
  14  -6   1   -0.46    0.40
 -14   6  -1   -0.38    0.40
 -14   6  -1   -0.50    0.73
 -14   6  -1   -0.52    0.73
  14  -5   1    0.47    0.83
  14  -5   1    0.88    0.43
 -14   5  -1    0.59    0.76
 -14   5  -1    1.42    0.42
 -14   5  -1    0.60    0.39
 -14   5  -1    0.28    0.67
  14  -4   1    2.67    0.87
  14  -4   1    4.02    0.56
  14  -4   1    4.83    1.03
 -14   4  -1    3.95    0.55
 -14   4  -1    3.41    0.77
 -14   4  -1    3.71    0.83
  14  -3   1    3.25    0.78
 -14   3  -1    1.86    0.73
  14  -2   1    0.23    0.50
  14  -2   1    0.19    0.90
 -14   2  -1    0.50    0.70
 -14   2  -1    0.73    0.50
 -14   2  -1    0.10    0.64
  14  -1   1    8.73    1.11
  14  -1   1   10.51    1.56
 -14   1  -1    9.26    1.26
 -14   1  -1    9.54    1.17
 -14   1  -1    7.13    1.11
  14   0   1    1.38    0.99
  14   0   1    0.47    0.56
 -14   0  -1    0.81    0.61
 -14   0  -1    1.60    0.57
 -14   0  -1    0.80    0.74
 -14   0  -1    0.66    0.70
  14   1   1    5.33    1.15
  14   1   1    4.63    0.72
 -14  -1  -1    3.31    0.69
 -14  -1  -1    3.51    0.89
 -14  -1  -1    3.74    0.84
 -14  -1  -1    4.96    0.77
  14   2   1    0.23    0.62
  14   2   1   -0.19    1.04
 -14  -2  -1    1.95    0.70
 -14  -2  -1    0.98    0.62
 -14  -2  -1   -0.01    0.78
 -14  -2  -1   -0.07    0.75
  14   3   1   -0.45    1.02
  14   3   1   -1.26    0.63
 -14  -3  -1    0.92    0.83
 -14  -3  -1    0.35    0.69
 -14  -3  -1   -0.62    0.70
  14   4   1    0.15    0.73
  14   4   1    0.99    1.17
 -14  -4  -1    1.34    0.85
 -14  -4  -1    0.62    0.80
 -14  -4  -1    0.54    0.78
  14   5   1    2.52    0.80
  14   5   1    4.26    1.35
  14   5   1    5.47    0.86
 -14  -5  -1    5.54    1.04
 -14  -5  -1    2.22    0.91
 -14  -5  -1    3.70    0.99
  14   6   1    1.19    0.87
  14   6   1    4.24    1.01
  15 -10   1   -0.76    0.51
  15 -10   1   -0.32    1.01
 -15  10  -1   -0.88    0.95
 -15  10  -1    0.02    0.94
 -15  10  -1   -0.47    0.47
  15  -9   1    0.01    0.49
  15  -9   1   -0.53    0.94
 -15   9  -1    0.05    0.46
 -15   9  -1   -0.68    0.87
 -15   9  -1   -0.52    0.86
  15  -8   1   -0.04    0.45
  15  -8   1    0.05    0.91
 -15   8  -1    0.83    0.78
 -15   8  -1    0.80    0.81
 -15   8  -1    0.22    0.46
  15  -7   1   -0.15    0.47
  15  -7   1   -0.50    0.91
 -15   7  -1   -0.08    0.43
 -15   7  -1    0.84    0.86
 -15   7  -1    0.06    0.81
  15  -6   1    3.19    1.04
  15  -6   1    3.05    0.57
 -15   6  -1    2.47    0.51
 -15   6  -1    3.31    0.92
 -15   6  -1    3.42    0.92
  15  -5   1    2.73    0.55
  15  -5   1    3.91    1.07
 -15   5  -1    2.60    0.82
 -15   5  -1    2.72    0.91
 -15   5  -1    3.01    0.55
  15  -4   1    1.03    0.96
  15  -4   1    0.10    0.50
 -15   4  -1   -0.04    0.82
 -15   4  -1    0.75    0.80
 -15   4  -1   -0.07    0.49
  15  -3   1    6.72    1.29
 -15   3  -1    9.70    1.36
 -15   3  -1    9.77    1.38
 -15   3  -1    8.40    1.10
 -15   3  -1    9.74    1.39
  15  -2   1   10.22    1.70
 -15   2  -1   11.16    1.46
 -15   2  -1   10.41    1.43
  15  -1   1    0.37    1.05
  15  -1   1    1.09    0.62
 -15   1  -1    0.87    0.64
 -15   1  -1    1.25    0.62
 -15   1  -1    0.54    0.76
 -15   1  -1    0.46    0.77
  15   0   1    4.59    0.82
  15   0   1    6.48    1.23
 -15   0  -1    6.24    1.06
 -15   0  -1    6.30    1.02
 -15   0  -1    8.65    1.19
  15   1   1    3.44    1.21
  15   1   1    2.59    0.75
 -15  -1  -1    3.22    0.97
 -15  -1  -1    2.84    0.73
 -15  -1  -1    3.66    0.74
 -15  -1  -1    2.25    0.89
  15   2   1    0.54    0.74
  15   2   1    0.17    1.18
 -15  -2  -1   -0.26    0.87
 -15  -2  -1    0.61    0.74
 -15  -2  -1    0.88    0.87
 -15  -2  -1    0.83    0.70
  15   3   1    1.59    0.83
  15   3   1    1.31    1.17
 -15  -3  -1    2.09    0.83
 -15  -3  -1    1.21    0.83
 -15  -3  -1    1.54    0.98
  15   4   1   -0.50    0.80
  15   4   1   -1.00    1.61
 -15  -4  -1   -0.45    0.86
 -15  -4  -1   -1.67    0.84
 -15  -4  -1    0.38    0.92
 -16   9  -1    0.44    0.90
  16  -8   1   -1.11    1.08
  16  -8   1   -0.63    0.54
 -16   8  -1    0.16    0.97
 -16   8  -1   -1.08    0.48
 -16   8  -1   -1.11    0.89
  16  -7   1    0.61    0.51
  16  -7   1   -0.58    1.01
 -16   7  -1    1.05    0.92
 -16   7  -1   -0.74    0.95
 -16   7  -1   -0.15    0.49
  16  -6   1    0.37    0.52
  16  -6   1   -0.38    1.04
 -16   6  -1   -0.62    0.90
 -16   6  -1   -0.87    0.83
 -16   6  -1    0.33    0.54
  16  -5   1   -0.07    1.07
  16  -5   1    0.37    0.56
 -16   5  -1    0.07    0.96
 -16   5  -1    0.06    0.53
 -16   5  -1   -0.24    0.90
  16  -4   1   -0.58    1.02
  16  -4   1    0.80    0.59
 -16   4  -1    0.18    0.58
 -16   4  -1   -0.27    0.88
 -16   4  -1    0.34    0.80
  16  -3   1    0.57    0.61
  16  -3   1   -0.52    1.07
 -16   3  -1   -0.97    0.83
 -16   3  -1    0.16    0.82
 -16   3  -1   -0.52    0.62
  16  -2   1    1.34    1.16
  16  -2   1    0.73    0.63
 -16   2  -1    1.05    0.88
 -16   2  -1    1.15    0.99
 -16   2  -1    0.54    0.67
  16  -1   1    2.75    0.74
  16  -1   1    3.31    1.28
 -16   1  -1    3.67    1.01
 -16   1  -1    3.10    0.95
 -16   1  -1    2.75    0.74
  16   0   1    4.72    0.83
  16   0   1    5.51    1.39
 -16   0  -1    3.88    1.00
 -16   0  -1    4.11    0.80
  16   1   1   -0.04    1.26
  16   1   1   -0.16    0.75
 -16  -1  -1   -0.08    0.92
 -16  -1  -1    1.33    0.71
 -16  -1  -1    0.53    1.05
 -16  -1  -1    0.72    0.75
 -16  -2   2   -0.14    0.77
  16   2  -2    1.16    0.80
 -16  -1   2    1.10    0.85
 -16  -1   2    0.43    1.04
 -16  -1   2    1.25    0.72
  16   1  -2   -0.43    1.27
  16   1  -2   -0.06    0.78
 -16   0   2   -0.39    0.69
 -16   0   2    0.25    1.01
 -16   0   2   -0.19    0.89
  16   0  -2   -1.25    1.24
  16   0  -2    0.09    0.70
 -16   1   2    0.46    0.88
 -16   1   2   -0.36    0.85
 -16   1   2   -0.71    0.65
  16  -1  -2   -0.06    0.71
  16  -1  -2    1.30    1.17
 -16   2   2    1.01    0.63
 -16   2   2    1.01    0.86
 -16   2   2    0.01    0.91
  16  -2  -2    1.42    1.15
  16  -2  -2    0.65    0.65
 -16   3   2    0.76    0.58
 -16   3   2    1.16    0.91
 -16   3   2    1.09    0.92
  16  -3  -2   -0.68    1.10
  16  -3  -2   -0.53    0.57
 -16   4   2    2.84    0.60
 -16   4   2    4.05    1.04
 -16   4   2    5.67    1.06
  16  -4  -2    3.85    1.16
  16  -4  -2    3.03    0.65
  16  -4  -2    1.43    1.36
 -16   5   2    2.20    0.57
 -16   5   2    3.94    1.06
 -16   5   2    2.86    0.89
  16  -5  -2    1.65    1.16
  16  -5  -2    0.68    2.01
  16  -5  -2    2.81    0.63
 -16   6   2    0.31    0.95
 -16   6   2    0.66    0.54
 -16   6   2    0.08    0.89
  16  -6  -2    0.10    0.56
  16  -6  -2    0.01    1.14
 -16   7   2    4.71    0.71
 -16   7   2    4.19    1.05
 -16   7   2    7.16    1.23
  16  -7  -2    7.92    1.05
  16  -7  -2    5.71    1.26
 -16   8   2    0.20    1.05
 -16   8   2    0.50    0.55
 -16   8   2   -0.35    0.83
  16  -8  -2   -0.19    0.58
  16  -8  -2    0.26    1.04
 -15  -4   2    1.93    1.03
 -15  -4   2    1.55    0.83
 -15  -4   2    1.29    0.77
 -15  -4   2    1.08    0.94
  15   4  -2    2.42    1.27
  15   4  -2    1.39    0.74
 -15  -3   2    0.30    0.71
 -15  -3   2    1.69    0.69
 -15  -3   2    0.57    0.86
 -15  -3   2   -0.03    0.93
  15   3  -2    0.91    1.28
  15   3  -2    0.12    0.74
 -15  -2   2    0.12    0.92
 -15  -2   2    0.00    0.70
 -15  -2   2    0.57    0.63
 -15  -2   2    0.00    0.80
  15   2  -2    1.06    0.75
  15   2  -2   -0.53    1.13
 -15  -1   2   -0.40    0.78
 -15  -1   2   -0.56    0.63
 -15  -1   2   -0.41    0.79
 -15  -1   2    0.89    0.59
  15   1  -2   -0.30    1.07
  15   1  -2    0.26    0.66
 -15   0   2    0.21    0.91
 -15   0   2    0.68    0.81
 -15   0   2   -0.01    0.62
  15   0  -2    0.07    1.05
  15   0  -2    0.14    0.65
 -15   1   2   -1.35    0.76
 -15   1   2   -0.88    0.73
 -15   1   2   -0.45    0.57
  15  -1  -2   -0.27    0.61
  15  -1  -2   -0.92    1.01
 -15   2   2    0.34    0.81
 -15   2   2    0.04    0.81
 -15   2   2    0.47    0.56
  15  -2  -2    2.74    1.01
  15  -2  -2    0.29    0.56
  15  -2  -2    0.24    1.00
 -15   3   2    0.88    0.76
 -15   3   2    0.49    0.87
 -15   3   2    0.55    0.51
  15  -3  -2    0.93    0.55
  15  -3  -2    0.92    0.95
  15  -3  -2    0.82    1.00
 -15   4   2    0.27    0.82
 -15   4   2    0.23    0.48
 -15   4   2    1.09    0.74
  15  -4  -2   -0.23    0.96
  15  -4  -2   -0.35    1.06
  15  -4  -2    0.59    0.53
 -15   5   2    0.86    0.81
 -15   5   2   -0.18    0.48
 -15   5   2    1.62    0.83
  15  -5  -2    0.36    0.50
  15  -5  -2   -0.89    0.94
  15  -5  -2   -2.12    1.10
 -15   6   2   -0.13    0.48
 -15   6   2   -0.04    0.81
 -15   6   2   -0.27    0.69
  15  -6  -2    0.41    0.96
  15  -6  -2   -0.04    0.49
 -15   7   2    2.05    0.87
 -15   7   2    2.88    0.93
 -15   7   2    2.63    0.55
  15  -7  -2    2.20    0.58
  15  -7  -2    2.81    1.02
 -15   8   2   -0.50    0.45
 -15   8   2   -0.99    0.82
 -15   8   2    0.28    0.82
  15  -8  -2    0.30    0.98
  15  -8  -2    0.07    0.51
 -15   9   2    1.64    0.93
 -15   9   2    1.24    0.93
 -15   9   2    0.60    0.51
  15  -9  -2    0.97    1.08
  15  -9  -2    0.98    0.57
 -15  10   2    0.14    1.00
 -15  10   2    0.16    0.49
 -15  10   2   -1.28    0.86
  15 -10  -2   -0.25    1.05
  15 -10  -2    0.37    0.56
 -14  -6   2    6.71    1.11
 -14  -6   2    9.39    1.47
  14   6  -2    7.98    1.54
 -14  -5   2    0.24    0.93
 -14  -5   2   -0.01    0.81
 -14  -5   2   -0.39    0.83
 -14  -5   2   -0.13    0.80
  14   5  -2    0.76    1.23
  14   5  -2   -1.38    0.66
 -14  -4   2    4.33    0.79
 -14  -4   2    2.69    0.84
 -14  -4   2    2.12    0.74
 -14  -4   2    3.57    0.95
  14   4  -2    3.91    1.13
  14   4  -2    2.85    0.77
 -14  -3   2    2.44    0.80
 -14  -3   2    2.67    0.73
 -14  -3   2    1.83    0.82
 -14  -3   2    4.08    0.76
  14   3  -2    3.74    0.82
  14   3  -2    4.06    1.17
 -14  -2   2    0.47    0.59
 -14  -2   2    0.35    0.59
 -14  -2   2    0.43    0.79
 -14  -2   2    0.32    0.71
  14   2  -2    2.82    0.95
  14   2  -2    0.23    0.64
  14   2  -2    0.19    1.00
 -14  -1   2    0.00    0.57
 -14  -1   2   -1.12    0.67
 -14  -1   2    1.22    0.84
  14   1  -2   -0.04    0.98
  14   1  -2   -0.09    0.58
  14   1  -2    1.95    0.89
 -14   0   2    1.85    0.76
 -14   0   2    1.51    0.72
 -14   0   2    1.79    0.59
  14   0  -2    2.44    1.03
  14   0  -2    2.05    0.63
 -14   1   2    0.84    0.47
 -14   1   2    0.08    0.77
 -14   1   2    0.18    0.51
 -14   1   2   -0.12    0.69
  14  -1  -2    1.42    0.82
  14  -1  -2   -0.37    0.90
  14  -1  -2   -0.18    0.52
 -14   2   2    5.48    0.67
 -14   2   2    8.76    1.21
 -14   2   2    6.17    0.92
  14  -2  -2    5.79    0.72
  14  -2  -2    4.78    1.00
  14  -2  -2    5.27    1.04
 -14   3   2   -0.62    0.72
 -14   3   2    0.25    0.43
 -14   3   2   -1.18    0.70
  14  -3  -2   -0.08    0.48
  14  -3  -2   -1.05    0.88
  14  -3  -2   -0.25    0.84
 -14   4   2    7.52    0.91
 -14   4   2    5.36    0.91
 -14   4   2    6.59    1.10
  14  -4  -2    5.74    1.05
  14  -4  -2    8.71    0.96
 -14   5   2    1.22    0.72
 -14   5   2    2.45    0.79
 -14   5   2    0.68    0.45
  14  -5  -2    0.88    0.47
  14  -5  -2    0.70    0.89
  14  -5  -2   -1.65    0.97
 -14   6   2    1.73    0.77
 -14   6   2    2.05    0.81
 -14   6   2    2.06    0.47
  14  -6  -2    1.18    0.84
  14  -6  -2    1.15    0.49
  14  -6  -2   -0.71    1.02
  14  -6  -2   -0.40    0.72
 -14   7   2    1.39    0.79
 -14   7   2    0.78    0.44
 -14   7   2    0.81    0.66
  14  -7  -2   -1.58    0.86
  14  -7  -2    1.34    0.50
  14  -7  -2    1.28    0.92
 -14   8   2    0.94    0.44
 -14   8   2    1.24    0.76
 -14   8   2   -0.08    0.80
  14  -8  -2   -0.67    0.83
  14  -8  -2    1.34    0.96
  14  -8  -2    0.78    0.49
 -14   9   2    3.40    0.88
 -14   9   2    2.00    0.88
 -14   9   2    2.95    0.50
  14  -9  -2    2.38    0.53
  14  -9  -2    1.68    0.89
  14  -9  -2    3.00    1.01
 -14  10   2    1.22    0.44
 -14  10   2    1.13    0.88
 -14  10   2    1.63    0.86
  14 -10  -2    1.57    1.07
  14 -10  -2    1.18    0.49
 -14  11   2   -0.08    0.41
 -14  11   2   -0.16    0.87
 -14  11   2   -1.45    0.81
  14 -11  -2    0.07    0.49
  14 -11  -2   -0.04    1.08
 -14  12   2   -0.09    0.44
 -14  12   2    0.02    0.96
 -14  12   2    0.17    0.85
  14 -12  -2   -0.66    0.51
  14 -12  -2   -1.65    1.03
 -13  -7   2    0.49    0.98
 -13  -7   2    0.30    0.85
  13   7  -2    1.37    1.20
 -13  -6   2    0.73    0.92
 -13  -6   2    2.96    0.86
 -13  -6   2    2.55    0.83
  13   6  -2    2.90    0.77
  13   6  -2    4.41    1.42
  13   6  -2    3.01    1.23
 -13  -5   2   -0.43    0.75
 -13  -5   2   -0.63    0.75
 -13  -5   2   -0.45    0.73
 -13  -5   2   -0.90    0.72
  13   5  -2    1.05    1.08
  13   5  -2   -1.19    0.64
 -13  -4   2    0.02    0.67
 -13  -4   2   -0.44    0.63
 -13  -4   2    0.29    0.65
 -13  -4   2   -0.38    0.71
  13   4  -2    2.12    0.98
  13   4  -2   -0.13    1.01
  13   4  -2   -0.57    0.65
 -13  -3   2   14.42    1.37
 -13  -3   2   11.42    1.41
 -13  -3   2   14.82    1.54
 -13  -3   2   10.89    1.45
  13   3  -2   14.57    1.47
  13   3  -2   14.67    1.77
  13   3  -2   17.70    1.77
 -13  -2   2    0.60    0.66
 -13  -2   2    0.31    0.64
 -13  -2   2   -0.16    0.54
 -13  -2   2   -0.79    0.63
  13   2  -2    2.02    0.83
  13   2  -2    0.38    0.54
  13   2  -2    0.45    0.92
 -13  -1   2    4.09    0.67
 -13  -1   2    7.24    0.86
 -13  -1   2    4.91    0.81
 -13  -1   2    4.01    0.76
  13   1  -2    5.38    0.97
 -13   0   2    2.31    0.52
 -13   0   2    1.41    0.74
 -13   0   2    1.12    0.50
 -13   0   2    1.32    0.66
  13   0  -2    2.08    0.54
  13   0  -2    2.25    0.76
  13   0  -2    1.16    0.88
 -13   1   2    3.46    0.54
 -13   1   2    2.96    0.71
 -13   1   2    2.48    0.68
  13  -1  -2    3.40    0.57
  13  -1  -2    4.27    0.86
  13  -1  -2    3.17    0.91
 -13   2   2    7.05    1.04
 -13   2   2    7.88    1.05
 -13   2   2    7.06    0.91
  13  -2  -2    8.14    1.42
  13  -2  -2    8.99    1.35
  13  -2  -2    8.50    0.96
 -13   3   2    1.19    0.73
 -13   3   2    1.58    0.45
 -13   3   2    1.29    0.40
 -13   3   2    1.06    0.66
  13  -3  -2    1.66    0.51
  13  -3  -2    1.96    0.46
  13  -3  -2    0.33    0.84
  13  -3  -2    0.32    0.78
 -13   4   2    4.92    0.82
 -13   4   2    3.99    0.54
 -13   4   2    4.26    0.76
  13  -4  -2    4.45    0.58
  13  -4  -2    3.84    0.68
  13  -4  -2    2.80    0.95
  13  -4  -2    3.73    0.87
 -13   5   2   -0.33    0.64
 -13   5   2   -0.07    0.38
 -13   5   2   -0.41    0.59
  13  -5  -2   -0.47    0.41
  13  -5  -2   -1.62    0.83
  13  -5  -2    0.50    0.74
 -13   6   2    3.11    0.46
 -13   6   2    2.38    0.67
 -13   6   2    1.91    0.73
  13  -6  -2    1.06    0.96
  13  -6  -2    1.24    0.71
  13  -6  -2    3.47    0.86
  13  -6  -2    3.79    0.51
 -13   7   2    2.07    0.42
 -13   7   2    0.59    0.62
 -13   7   2    2.01    0.73
  13  -7  -2    0.55    0.69
  13  -7  -2    1.90    0.88
  13  -7  -2   -0.94    0.90
  13  -7  -2    1.89    0.46
 -13   8   2   11.73    1.23
 -13   8   2    9.53    1.31
 -13   8   2    9.06    0.88
  13  -8  -2   10.35    1.43
  13  -8  -2    7.99    1.02
  13  -8  -2    6.92    1.31
  13  -8  -2    8.46    0.95
 -13   9   2    0.32    0.72
 -13   9   2    0.61    0.65
 -13   9   2    0.24    0.35
  13  -9  -2    0.38    0.41
  13  -9  -2    0.36    0.86
  13  -9  -2   -0.90    1.40
 -13  10   2    0.52    0.37
 -13  10   2    1.07    0.78
 -13  10   2    0.96    0.77
  13 -10  -2    0.50    0.43
  13 -10  -2   -0.14    0.85
 -13  11   2   -0.13    0.40
 -13  11   2    0.65    0.78
 -13  11   2   -0.26    0.76
  13 -11  -2   -0.35    0.85
  13 -11  -2   -0.83    0.43
 -13  12   2    3.07    0.51
 -13  12   2    3.72    0.87
 -13  12   2    2.53    0.92
  13 -12  -2    1.66    0.96
  13 -12  -2    2.49    0.53
 -13  13   2   -0.10    0.48
 -13  13   2   -0.16    0.80
 -13  13   2    0.77    0.92
  13 -13  -2   -0.05    1.02
  13 -13  -2    0.90    0.53
 -12  -9   2    7.83    1.32
  12   9  -2    4.45    1.44
 -12  -8   2    2.07    0.84
 -12  -8   2    3.56    1.04
  12   8  -2    2.58    1.23
 -12  -7   2    0.77    0.75
 -12  -7   2    0.95    0.89
  12   7  -2    1.97    1.36
  12   7  -2   -0.36    1.07
 -12  -6   2   -0.07    0.70
 -12  -6   2   -0.08    0.85
 -12  -6   2   -0.10    0.72
  12   6  -2   -0.37    0.70
  12   6  -2    0.77    0.93
  12   6  -2    0.08    1.04
 -12  -5   2    1.12    0.67
 -12  -5   2    1.63    0.68
 -12  -5   2    1.57    0.69
 -12  -5   2    2.26    0.75
  12   5  -2    3.41    0.97
  12   5  -2    0.94    0.95
  12   5  -2    1.39    0.65
 -12  -4   2    0.14    0.63
 -12  -4   2   -0.29    0.58
 -12  -4   2   -0.05    0.70
 -12  -4   2   -1.14    0.55
  12   4  -2    0.30    0.58
  12   4  -2    2.16    0.87
  12   4  -2    0.85    0.96
 -12  -3   2    6.08    0.93
 -12  -3   2    8.79    1.13
 -12  -3   2    6.98    0.91
 -12  -3   2    5.50    0.99
  12   3  -2    8.75    1.38
  12   3  -2    5.74    0.81
 -12  -2   2   -0.91    0.66
 -12  -2   2    0.16    0.49
 -12  -2   2    0.02    0.51
 -12  -2   2   -0.72    0.56
  12   2  -2    1.23    0.49
  12   2  -2    1.66    0.73
  12   2  -2    0.18    0.79
  12   2  -2   -0.16    0.53
 -12  -1   2    4.56    0.62
 -12  -1   2    6.40    0.78
 -12  -1   2    4.27    0.74
 -12  -1   2    4.78    0.83
 -12  -1   2    3.67    0.58
 -12   0   2    1.94    0.45
 -12   0   2    1.31    0.62
 -12   0   2    0.59    0.60
 -12   0   2    1.09    0.46
 -12   0   2    0.57    0.44
  12   0  -2    0.14    0.57
  12   0  -2    1.45    0.66
  12   0  -2    1.51    0.44
  12   0  -2    0.79    0.47
  12   0  -2    1.52    0.77
 -12   1   2   10.20    1.26
 -12   1   2   11.87    1.24
 -12   1   2   12.25    1.12
  12  -1  -2   15.02    1.16
  12  -1  -2   11.61    1.45
 -12   2   2    4.02    0.73
 -12   2   2    6.04    0.79
 -12   2   2    3.93    0.55
 -12   2   2    4.88    0.75
 -12   2   2    5.96    0.65
  12  -2  -2    4.36    0.57
  12  -2  -2    5.16    0.92
  12  -2  -2    3.55    0.66
  12  -2  -2    3.13    0.85
 -12   3   2    2.88    0.48
 -12   3   2    4.49    0.77
 -12   3   2    3.37    0.65
 -12   3   2    4.49    0.51
  12  -3  -2    4.27    0.61
  12  -3  -2    4.18    0.79
  12  -3  -2    3.79    0.87
  12  -3  -2    3.53    0.58
 -12   4   2    4.42    0.71
 -12   4   2    4.27    0.50
 -12   4   2    2.87    0.70
 -12   4   2    5.05    0.46
 -12   4   2    3.81    0.71
  12  -4  -2    3.21    0.57
  12  -4  -2    2.86    0.64
  12  -4  -2    3.87    0.83
  12  -4  -2    2.58    0.86
 -12   5   2    2.34    0.60
 -12   5   2    2.20    0.42
 -12   5   2    2.49    0.42
 -12   5   2    2.90    0.72
  12  -5  -2    3.03    0.79
  12  -5  -2    1.90    0.62
  12  -5  -2    2.25    0.51
  12  -5  -2    0.96    0.84
  12  -5  -2    2.83    0.46
 -12   6   2    8.68    1.03
 -12   6   2    9.18    1.21
 -12   6   2    8.53    0.87
 -12   6   2   10.11    1.05
  12  -6  -2    9.38    1.31
  12  -6  -2    9.73    1.04
  12  -6  -2    6.99    1.41
  12  -6  -2   10.13    0.91
  12  -6  -2    8.69    1.20
 -12   7   2    0.37    0.62
 -12   7   2   -0.95    0.60
 -12   7   2   -0.30    0.31
  12  -7  -2   -0.62    0.43
  12  -7  -2   -0.95    0.58
  12  -7  -2   -0.10    0.36
  12  -7  -2   -1.13    0.76
 -12   8   2    1.65    0.36
 -12   8   2    1.59    0.67
 -12   8   2    1.88    0.68
  12  -8  -2    1.48    0.79
  12  -8  -2    2.00    0.41
  12  -8  -2    1.40    0.89
  12  -8  -2    1.51    0.93
 -12   9   2    0.53    0.65
 -12   9   2    0.18    0.33
 -12   9   2    1.24    0.70
  12  -9  -2   -0.86    0.93
  12  -9  -2   -0.27    0.71
  12  -9  -2   -0.18    0.36
 -12  10   2    3.02    0.77
 -12  10   2    4.20    0.49
 -12  10   2    4.01    0.81
  12 -10  -2    4.07    0.86
  12 -10  -2    3.33    0.51
 -12  11   2    0.22    0.70
 -12  11   2    0.13    0.40
 -12  11   2    0.71    0.82
 -12  11   2    0.12    0.72
  12 -11  -2    0.52    0.43
  12 -11  -2   -0.04    0.83
 -12  12   2   13.95    1.23
 -12  12   2   13.34    1.75
 -12  12   2   14.50    1.49
 -12  12   2   14.40    1.61
  12 -12  -2   12.07    1.77
  12 -12  -2   14.46    1.22
 -12  13   2    1.45    1.02
 -12  13   2    1.29    0.49
 -12  13   2    1.68    0.73
 -12  13   2    0.18    0.78
  12 -13  -2    0.24    0.85
  12 -13  -2    0.48    0.52
 -12  14   2    7.01    1.29
 -12  14   2    7.21    0.99
  12 -14  -2    4.79    1.10
  12 -14  -2    7.23    0.99
 -11 -10   2    3.55    1.58
 -11 -10   2    2.44    1.16
  11  10  -2    2.71    1.24
 -11  -9   2    3.89    1.09
 -11  -9   2    3.11    0.86
  11   9  -2    2.87    1.16
 -11  -8   2   -0.35    0.72
 -11  -8   2    0.46    0.88
  11   8  -2    0.20    1.06
  11   8  -2    0.65    1.12
 -11  -7   2    0.45    0.67
 -11  -7   2   -0.10    0.79
  11   7  -2   -0.28    0.62
  11   7  -2    0.06    0.98
  11   7  -2    2.60    0.93
  11   7  -2    0.52    0.61
 -11  -6   2   -0.24    0.67
 -11  -6   2    0.14    0.73
 -11  -6   2   -0.14    0.66
  11   6  -2   -0.45    0.55
  11   6  -2   -1.18    0.90
  11   6  -2    0.09    0.83
  11   6  -2    0.14    0.54
 -11  -5   2    0.06    0.56
 -11  -5   2    1.22    0.68
 -11  -5   2   -0.13    0.55
 -11  -5   2    0.04    0.65
 -11  -5   2    1.49    0.55
  11   5  -2    0.53    0.50
  11   5  -2   -0.23    0.52
  11   5  -2    0.41    0.89
  11   5  -2    1.50    0.80
 -11  -4   2   -0.33    0.53
 -11  -4   2    0.07    0.52
 -11  -4   2    0.11    0.47
 -11  -4   2   -0.15    0.50
 -11  -4   2   -0.53    0.65
  11   4  -2   -0.51    0.67
  11   4  -2    1.21    0.77
  11   4  -2    1.36    0.87
  11   4  -2    0.47    0.46
  11   4  -2    0.79    0.53
 -11  -3   2    3.08    0.67
 -11  -3   2    3.07    0.61
 -11  -3   2    2.97    0.62
 -11  -3   2    3.12    0.57
 -11  -3   2    2.33    0.68
  11   3  -2    3.18    0.59
  11   3  -2    3.90    0.77
  11   3  -2    3.40    0.52
  11   3  -2    3.96    0.88
  11   3  -2    2.20    0.68
 -11  -2   2   -0.34    0.56
 -11  -2   2    0.26    0.45
 -11  -2   2    0.01    0.41
  11   2  -2    0.48    0.56
  11   2  -2    1.36    0.69
  11   2  -2    1.09    0.69
  11   2  -2    0.24    0.39
  11   2  -2    0.50    0.64
  11   2  -2    0.32    0.76
 -11  -1   2    7.64    1.02
 -11  -1   2    8.94    1.04
 -11  -1   2    8.94    1.05
 -11  -1   2    8.27    0.90
  11   1  -2   10.85    1.22
  11   1  -2   10.89    0.93
  11   1  -2    7.79    1.17
 -11   0   2    1.55    0.45
 -11   0   2    2.36    0.47
 -11   0   2    2.47    0.48
 -11   0   2    2.52    0.59
 -11   0   2    2.65    0.69
  11   0  -2    1.57    0.53
  11   0  -2    2.31    0.70
  11   0  -2    3.08    0.48
  11   0  -2    3.44    0.74
  11   0  -2    2.95    0.76
  11   0  -2    3.23    0.54
 -11   1   2   18.07    1.54
 -11   1   2   15.36    1.36
 -11   1   2   15.54    1.46
 -11   1   2   19.05    1.33
  11  -1  -2   17.36    1.64
  11  -1  -2   19.22    1.40
  11  -1  -2   16.10    1.38
  11  -1  -2   14.05    1.47
  11  -1  -2   17.33    1.83
  11  -1  -2   16.75    1.61
 -11   2   2   23.03    1.87
 -11   2   2   27.50    1.80
 -11   2   2   23.37    1.94
 -11   2   2   25.28    1.96
 -11   2   2   24.42    1.83
  11  -2  -2   26.17    2.26
  11  -2  -2   24.72    1.87
  11  -2  -2   25.16    2.03
  11  -2  -2   20.62    1.95
  11  -2  -2   27.28    1.87
  11  -2  -2   24.76    2.10
 -11   3   2    0.45    0.29
 -11   3   2    0.54    0.34
 -11   3   2    0.34    0.47
 -11   3   2   -0.09    0.59
 -11   3   2    0.91    0.37
  11  -3  -2    0.20    0.43
  11  -3  -2    0.49    0.39
  11  -3  -2    0.33    0.65
  11  -3  -2    0.61    0.70
  11  -3  -2    0.27    0.46
 -11   4   2    1.51    0.37
 -11   4   2    1.28    0.26
 -11   4   2    1.34    0.34
 -11   4   2    1.33    0.61
 -11   4   2    0.80    0.50
  11  -4  -2    1.70    0.69
  11  -4  -2    1.37    0.39
  11  -4  -2    1.06    0.51
  11  -4  -2    1.22    0.73
  11  -4  -2    1.19    0.42
 -11   5   2    6.22    0.99
 -11   5   2    6.45    0.78
 -11   5   2    6.25    0.70
 -11   5   2    6.43    0.87
 -11   5   2    7.04    0.61
  11  -5  -2    6.67    0.73
  11  -5  -2    6.73    1.13
  11  -5  -2    4.28    0.89
  11  -5  -2    5.89    0.99
  11  -5  -2    6.83    0.83
 -11   6   2    3.18    0.49
 -11   6   2    3.69    0.64
 -11   6   2    3.17    0.66
 -11   6   2    3.80    0.42
  11  -6  -2    3.52    0.45
  11  -6  -2    3.85    0.63
  11  -6  -2    2.50    0.82
  11  -6  -2    3.26    0.47
  11  -6  -2    3.50    0.81
 -11   7   2    8.60    1.03
 -11   7   2    8.41    1.01
 -11   7   2    6.88    0.73
  11  -7  -2    7.71    1.14
  11  -7  -2    8.45    0.86
  11  -7  -2    8.11    1.36
  11  -7  -2    7.36    0.78
 -11   8   2   -0.31    0.59
 -11   8   2   -0.12    0.30
 -11   8   2   -0.37    0.27
 -11   8   2   -1.08    0.58
  11  -8  -2   -0.25    0.33
  11  -8  -2   -0.37    0.78
  11  -8  -2   -0.40    0.70
 -11   9   2    0.41    0.70
 -11   9   2    1.07    0.36
 -11   9   2    0.91    0.59
 -11   9   2    1.35    0.65
  11  -9  -2    0.75    0.37
  11  -9  -2    1.02    0.85
  11  -9  -2    0.21    0.65
 -11  10   2    1.79    0.77
 -11  10   2    1.29    0.63
 -11  10   2    2.37    0.43
 -11  10   2    2.01    0.68
  11 -10  -2    1.55    0.94
  11 -10  -2    1.79    0.68
  11 -10  -2    1.97    0.42
 -11  11   2    3.61    0.75
 -11  11   2    2.68    0.84
 -11  11   2    2.64    0.45
 -11  11   2    1.81    0.71
  11 -11  -2    2.70    0.48
  11 -11  -2    1.83    0.76
 -11  12   2    0.57    0.67
 -11  12   2    0.99    0.91
 -11  12   2    0.60    0.45
 -11  12   2    1.37    0.70
  11 -12  -2    1.16    0.79
  11 -12  -2    0.99    0.48
 -11  13   2    0.90    0.46
 -11  13   2    0.71    0.74
 -11  13   2    0.99    0.66
 -11  13   2    0.83    0.92
  11 -13  -2    1.46    0.85
  11 -13  -2    0.12    0.51
 -11  14   2    5.25    1.15
 -11  14   2    4.78    0.63
 -11  14   2    3.98    0.93
  11 -14  -2    4.60    1.05
  11 -14  -2    4.96    0.66
 -10 -11   2   -0.17    1.05
  10  11  -2    0.57    1.02
  10  11  -2    1.23    1.21
 -10 -10   2    3.73    1.04
  10  10  -2    4.78    1.24
  10  10  -2    6.08    0.91
 -10  -9   2    0.70    0.87
 -10  -9   2    1.02    0.70
  10   9  -2    1.00    0.72
  10   9  -2    1.07    1.04
  10   9  -2    0.93    1.31
 -10  -8   2    4.84    0.93
 -10  -8   2    4.48    0.79
  10   8  -2    4.41    1.07
  10   8  -2    3.75    1.01
  10   8  -2    5.26    0.88
  10   8  -2    2.60    0.88
 -10  -7   2    1.51    0.76
 -10  -7   2    1.18    0.63
 -10  -7   2    0.75    0.65
  10   7  -2    1.31    0.80
  10   7  -2    1.55    0.70
  10   7  -2    1.29    0.57
  10   7  -2   -0.30    0.93
  10   7  -2    0.48    0.57
 -10  -6   2    2.37    0.70
 -10  -6   2    2.17    0.58
 -10  -6   2    2.52    0.66
 -10  -6   2    3.26    0.74
  10   6  -2    2.37    0.57
  10   6  -2    3.32    0.94
  10   6  -2    2.90    0.64
  10   6  -2    3.09    0.82
  10   6  -2    1.60    0.55
 -10  -5   2    0.14    0.49
 -10  -5   2    0.17    0.48
 -10  -5   2    0.01    0.61
 -10  -5   2   -0.60    0.48
 -10  -5   2   -0.54    0.58
  10   5  -2    0.09    0.46
  10   5  -2    0.64    0.70
  10   5  -2   -0.25    0.80
  10   5  -2    0.39    0.49
  10   5  -2   -0.52    0.47
 -10  -4   2   14.47    1.26
 -10  -4   2   11.24    1.17
 -10  -4   2   11.69    1.22
 -10  -4   2   12.20    1.20
 -10  -4   2   11.11    1.17
  10   4  -2   10.14    1.38
  10   4  -2   11.84    1.13
  10   4  -2   12.03    1.08
  10   4  -2   12.16    1.46
  10   4  -2   10.89    1.14
  10   4  -2   11.60    1.37
 -10  -3   2    4.45    0.58
 -10  -3   2    3.42    0.63
 -10  -3   2    3.23    0.59
 -10  -3   2    6.26    0.85
 -10  -3   2    3.49    0.60
  10   3  -2    3.83    0.53
  10   3  -2    4.08    0.59
  10   3  -2    4.92    0.85
  10   3  -2    2.61    0.63
  10   3  -2    4.27    0.77
 -10  -2   2   15.03    1.39
 -10  -2   2   15.83    1.38
 -10  -2   2   17.59    1.38
 -10  -2   2   17.27    1.36
 -10  -2   2   17.61    1.43
  10   2  -2   14.50    1.47
  10   2  -2   18.26    1.60
  10   2  -2   15.88    1.53
  10   2  -2   15.30    1.36
  10   2  -2   18.19    1.32
 -10  -1   2   -0.24    0.85
 -10  -1   2    0.79    0.39
 -10  -1   2    0.22    0.38
 -10  -1   2    0.13    0.38
 -10  -1   2   -0.24    0.44
  10   1  -2    0.36    0.38
  10   1  -2   -0.27    0.56
  10   1  -2    0.09    0.42
  10   1  -2    1.21    0.66
 -10   0   2    3.54    0.45
 -10   0   2    2.80    0.52
 -10   0   2    2.50    0.45
 -10   0   2    2.62    0.47
  10   0  -2    2.52    0.65
  10   0  -2    3.05    0.47
  10   0  -2    2.08    0.48
 -10   1   2    9.07    0.77
 -10   1   2    8.23    0.94
 -10   1   2    8.29    0.82
 -10   1   2    8.18    1.00
  10  -1  -2    7.32    1.17
  10  -1  -2    8.90    1.26
  10  -1  -2    7.07    0.81
  10  -1  -2    6.26    0.93
  10  -1  -2    7.17    0.88
 -10   2   2   62.32    4.37
 -10   2   2   64.49    4.45
 -10   2   2   66.42    4.49
 -10   2   2   62.05    4.40
 -10   2   2   65.77    4.36
  10  -2  -2   61.24    4.51
  10  -2  -2   62.00    4.38
  10  -2  -2   63.10    4.40
  10  -2  -2   62.65    4.53
  10  -2  -2   61.84    4.56
  10  -2  -2   63.33    4.46
 -10   3   2   13.54    0.97
 -10   3   2   12.76    1.21
 -10   3   2   11.95    1.05
 -10   3   2   11.82    1.08
 -10   3   2   13.29    1.13
  10  -3  -2   12.05    1.12
  10  -3  -2   13.25    1.47
  10  -3  -2   11.88    1.15
  10  -3  -2   13.73    1.40
  10  -3  -2   12.93    1.07
  10  -3  -2   11.26    1.35
 -10   4   2    8.92    0.88
 -10   4   2   10.01    0.99
 -10   4   2   10.03    0.76
  10  -4  -2    8.69    1.05
  10  -4  -2   10.11    0.94
  10  -4  -2    9.66    1.29
  10  -4  -2    9.87    1.28
 -10   5   2    1.87    0.33
 -10   5   2    2.06    0.57
 -10   5   2    1.19    0.35
 -10   5   2    2.25    0.59
  10  -5  -2    1.81    0.38
  10  -5  -2    1.62    0.60
  10  -5  -2    2.29    0.51
  10  -5  -2    1.29    0.73
  10  -5  -2    1.96    0.69
 -10   6   2   -0.25    0.27
 -10   6   2   -0.07    0.51
 -10   6   2    0.30    0.53
 -10   6   2   -0.08    0.31
  10  -6  -2   -0.16    0.31
  10  -6  -2    0.16    0.79
  10  -6  -2    0.07    0.65
  10  -6  -2   -0.21    0.49
  10  -6  -2    0.14    0.30
 -10   7   2    0.94    0.55
 -10   7   2   -0.05    0.50
 -10   7   2    0.30    0.31
 -10   7   2    0.48    0.26
 -10   7   2    1.01    0.57
  10  -7  -2    0.79    0.71
  10  -7  -2    0.72    0.33
  10  -7  -2    0.39    0.32
  10  -7  -2    0.41    0.53
 -10   8   2   -0.13    0.61
 -10   8   2    0.31    0.52
 -10   8   2    0.04    0.24
 -10   8   2   -0.02    0.57
 -10   8   2   -0.12    0.31
  10  -8  -2    0.53    0.33
  10  -8  -2    0.49    0.58
  10  -8  -2   -0.06    0.70
  10  -8  -2   -0.40    0.34
  10  -8  -2    0.21    0.32
 -10   9   2    0.88    0.64
 -10   9   2    0.36    0.56
 -10   9   2    1.07    0.35
 -10   9   2    0.87    0.29
 -10   9   2    0.62    0.67
  10  -9  -2    1.46    0.39
  10  -9  -2    1.37    0.60
  10  -9  -2    1.27    0.37
  10  -9  -2    0.62    0.77
 -10  10   2   -0.63    0.33
 -10  10   2   -0.61    0.61
 -10  10   2   -0.21    0.28
 -10  10   2   -1.00    0.69
 -10  10   2   -0.93    0.56
 -10  10   2   -0.20    0.61
  10 -10  -2   -0.44    0.60
  10 -10  -2   -0.57    0.37
  10 -10  -2   -0.70    0.46
  10 -10  -2   -1.16    0.80
 -10  11   2    2.65    0.44
 -10  11   2    3.13    1.04
 -10  11   2    2.07    0.77
 -10  11   2    3.12    0.69
 -10  11   2    3.39    0.88
  10 -11  -2    0.82    1.10
  10 -11  -2    2.48    0.74
  10 -11  -2    3.01    0.47
 -10  12   2    0.21    0.83
 -10  12   2   -0.82    0.64
 -10  12   2   -0.21    0.37
 -10  12   2   -0.40    0.79
  10 -12  -2   -0.24    0.39
  10 -12  -2   -0.02    0.70
 -10  13   2    1.35    0.63
 -10  13   2    0.75    0.70
 -10  13   2    0.10    0.42
 -10  13   2    0.56    0.85
  10 -13  -2    0.62    0.43
  10 -13  -2    0.95    0.79
 -10  14   2    0.40    0.44
 -10  14   2    0.96    0.96
 -10  14   2    0.85    0.71
  10 -14  -2    0.06    0.86
  10 -14  -2    0.04    0.49
 -10  15   2    1.18    0.52
 -10  15   2    2.04    1.08
 -10  15   2    2.44    0.81
  10 -15  -2    1.88    0.99
  10 -15  -2    1.21    0.56
   9  12  -2    0.59    1.12
   9  12  -2   -0.39    0.93
  -9 -11   2    2.11    1.00
   9  11  -2    1.59    0.84
   9  11  -2    2.39    1.15
   9  11  -2    2.52    0.83
  -9 -10   2    0.40    0.90
  -9 -10   2    1.35    0.70
   9  10  -2    1.88    1.02
   9  10  -2    1.61    0.71
   9  10  -2    1.63    0.82
  -9  -9   2    2.58    0.91
  -9  -9   2    2.78    0.71
   9   9  -2    2.40    0.98
   9   9  -2    2.81    0.97
   9   9  -2    1.00    1.21
   9   9  -2    2.21    0.68
  -9  -8   2    2.27    0.82
  -9  -8   2    1.04    0.65
   9   8  -2    1.91    0.95
   9   8  -2    1.81    0.83
   9   8  -2    1.25    0.68
  -9  -7   2   -0.61    0.67
  -9  -7   2    0.41    0.56
  -9  -7   2    0.37    0.56
   9   7  -2    0.42    0.47
   9   7  -2    0.04    0.58
   9   7  -2    0.16    0.70
   9   7  -2    0.07    0.48
   9   7  -2   -0.36    0.83
  -9  -6   2    0.33    0.46
  -9  -6   2    1.29    0.66
  -9  -6   2    0.98    0.62
  -9  -6   2    0.66    0.53
   9   6  -2    1.25    0.50
   9   6  -2    0.40    0.69
   9   6  -2    0.67    0.84
   9   6  -2    1.18    0.49
   9   6  -2    1.50    0.54
  -9  -5   2   -0.57    0.44
  -9  -5   2   -0.16    0.41
  -9  -5   2   -0.80    0.45
  -9  -5   2   -0.13    0.52
  -9  -5   2   -0.18    0.58
   9   5  -2   -0.53    0.46
   9   5  -2    0.59    0.47
   9   5  -2    0.04    0.77
   9   5  -2   -0.02    0.65
   9   5  -2   -0.14    0.42
  -9  -4   2    0.07    0.45
  -9  -4   2    0.18    0.40
  -9  -4   2    0.51    0.53
  -9  -4   2    0.95    0.48
  -9  -4   2    0.35    0.42
   9   4  -2   -0.46    0.44
   9   4  -2    0.22    0.61
   9   4  -2    0.36    0.44
   9   4  -2   -0.15    0.50
   9   4  -2    0.26    0.71
   9   4  -2   -0.22    0.40
  -9  -3   2    2.13    0.54
  -9  -3   2    2.82    0.53
  -9  -3   2    2.67    0.51
  -9  -3   2    2.76    0.49
  -9  -3   2    3.42    0.51
   9   3  -2    3.96    0.65
   9   3  -2    3.27    0.67
   9   3  -2    2.12    0.52
   9   3  -2    2.82    0.78
   9   3  -2    2.83    0.49
  -9  -2   2    8.49    0.87
  -9  -2   2    9.51    0.88
  -9  -2   2    6.05    0.88
  -9  -2   2    8.96    0.95
  -9  -2   2    6.87    0.87
   9   2  -2    7.81    1.09
   9   2  -2    9.58    1.14
   9   2  -2    9.14    0.86
   9   2  -2    8.90    1.00
   9   2  -2    8.79    0.84
  -9  -1   2    5.38    0.69
  -9  -1   2    5.88    0.72
  -9  -1   2    5.67    0.77
  -9  -1   2    4.95    0.70
  -9  -1   2    5.02    0.83
   9   1  -2    4.64    0.72
   9   1  -2    5.65    0.72
   9   1  -2    4.95    0.81
   9   1  -2    7.04    0.98
   9   1  -2    4.94    0.70
  -9   0   2   -0.24    0.31
  -9   0   2   -0.06    0.48
  -9   0   2   -0.28    0.31
  -9   0   2    0.16    0.39
  -9   0   2   -0.44    0.30
   9   0  -2    0.13    0.34
   9   0  -2    0.53    0.50
   9   0  -2    0.11    0.45
   9   0  -2   -0.03    0.36
   9   0  -2   -0.03    0.54
   9   0  -2   -0.10    0.34
  -9   1   2    2.71    0.36
  -9   1   2    1.68    0.52
  -9   1   2    1.94    0.36
  -9   1   2    2.14    0.47
   9  -1  -2    2.40    0.60
   9  -1  -2    2.06    0.41
   9  -1  -2    1.74    0.51
   9  -1  -2    2.23    0.39
   9  -1  -2    1.61    0.38
   9  -1  -2    2.24    0.63
  -9   2   2    0.82    0.49
  -9   2   2    0.75    0.44
  -9   2   2    1.00    0.29
  -9   2   2    0.69    0.31
  -9   2   2    0.45    0.30
   9  -2  -2    0.39    0.46
   9  -2  -2    0.65    0.32
   9  -2  -2    0.53    0.35
   9  -2  -2    0.60    0.56
   9  -2  -2    0.68    0.39
   9  -2  -2    0.45    0.51
  -9   3   2    0.09    0.27
  -9   3   2   -0.61    0.48
  -9   3   2    0.23    0.38
  -9   3   2    0.42    0.26
  -9   3   2    0.40    0.27
   9  -3  -2    0.26    0.45
   9  -3  -2    0.46    0.28
   9  -3  -2    0.68    0.56
   9  -3  -2    0.22    0.31
   9  -3  -2    0.32    0.41
   9  -3  -2   -0.65    0.50
  -9   4   2    0.85    0.41
  -9   4   2    0.30    0.28
  -9   4   2    0.87    0.45
  -9   4   2    0.66    0.27
   9  -4  -2    0.79    0.49
   9  -4  -2   -0.08    0.59
   9  -4  -2    1.74    0.59
   9  -4  -2    0.48    0.30
   9  -4  -2    0.45    0.33
   9  -4  -2    1.53    0.43
  -9   5   2   27.93    2.01
  -9   5   2   26.48    1.93
  -9   5   2   26.90    2.01
  -9   5   2   23.17    1.87
   9  -5  -2   27.95    1.93
   9  -5  -2   24.88    1.88
   9  -5  -2   26.50    2.22
   9  -5  -2   27.20    2.01
   9  -5  -2   27.80    2.14
  -9   6   2    9.28    0.93
  -9   6   2   10.83    1.01
  -9   6   2   11.19    1.15
  -9   6   2   10.53    0.89
  -9   6   2   11.83    1.10
   9  -6  -2   10.93    1.08
   9  -6  -2   11.73    0.95
   9  -6  -2   10.54    1.26
   9  -6  -2   10.67    1.42
   9  -6  -2   10.45    0.89
  -9   7   2   -0.33    0.76
  -9   7   2   -0.28    0.24
  -9   7   2    0.17    0.41
  -9   7   2   -0.36    0.29
  -9   7   2   -0.36    0.58
  -9   7   2    0.47    0.43
   9  -7  -2    0.18    0.61
   9  -7  -2    0.06    0.54
   9  -7  -2   -0.48    0.52
   9  -7  -2    0.23    0.46
   9  -7  -2    0.09    0.29
   9  -7  -2   -0.54    0.28
  -9   8   2    0.01    0.56
  -9   8   2    0.13    0.50
  -9   8   2    0.37    0.60
  -9   8   2    0.16    0.47
  -9   8   2    0.19    0.31
  -9   8   2    1.07    0.26
   9  -8  -2    0.35    0.33
   9  -8  -2    0.90    0.72
   9  -8  -2    0.17    0.28
   9  -8  -2    0.30    0.33
   9  -8  -2   -0.44    0.64
   9  -8  -2    0.35    0.51
  -9   9   2    0.42    0.64
  -9   9   2    0.44    0.52
  -9   9   2    1.19    0.26
  -9   9   2    0.25    0.53
  -9   9   2    1.27    0.33
  -9   9   2    1.29    0.52
   9  -9  -2    1.21    0.38
   9  -9  -2    0.85    0.63
   9  -9  -2    1.08    0.35
   9  -9  -2    0.60    0.73
  -9  10   2    1.71    0.59
  -9  10   2    0.95    0.74
  -9  10   2    2.49    0.32
  -9  10   2    1.40    0.58
  -9  10   2    2.26    0.37
  -9  10   2    1.37    0.64
   9 -10  -2    2.41    0.39
   9 -10  -2    0.81    0.80
   9 -10  -2    2.62    0.66
   9 -10  -2    1.79    0.47
  -9  11   2    5.03    0.69
  -9  11   2    4.07    0.58
  -9  11   2    4.16    0.85
  -9  11   2    4.64    0.73
  -9  11   2    3.43    0.86
  -9  11   2    5.09    0.62
   9 -11  -2    4.23    0.62
   9 -11  -2    4.25    0.77
   9 -11  -2    4.55    0.65
   9 -11  -2    4.34    0.99
  -9  12   2   -0.31    0.52
  -9  12   2    0.46    0.34
  -9  12   2    0.11    0.77
  -9  12   2    0.84    0.61
   9 -12  -2    0.18    0.68
   9 -12  -2    0.53    0.39
   9 -12  -2   -0.04    0.55
  -9  13   2    2.63    0.73
  -9  13   2    2.95    0.45
  -9  13   2    3.83    0.95
   9 -13  -2    2.65    0.73
   9 -13  -2    2.67    0.48
   9 -13  -2    3.65    0.87
  -9  14   2    0.59    0.68
  -9  14   2    0.22    0.42
  -9  14   2    0.94    1.00
   9 -14  -2    0.20    0.45
   9 -14  -2    0.43    0.82
  -9  15   2    5.33    0.90
  -9  15   2    6.70    1.23
  -9  15   2    6.52    0.88
   9 -15  -2    4.22    1.09
   9 -15  -2    6.48    0.90
  -8 -12   2   -0.92    0.97
   8  12  -2    0.09    1.00
   8  12  -2    0.36    0.80
   8  12  -2   -0.45    0.82
  -8 -11   2    3.71    1.03
   8  11  -2    4.02    1.08
   8  11  -2    3.23    0.79
   8  11  -2    3.07    0.82
  -8 -10   2   -0.11    0.73
  -8 -10   2   -0.38    0.82
   8  10  -2   -0.98    0.64
   8  10  -2   -0.01    0.61
   8  10  -2    0.06    0.94
  -8  -9   2    8.35    1.05
  -8  -9   2    9.67    1.32
   8   9  -2    5.85    1.10
   8   9  -2   10.24    1.44
   8   9  -2    8.61    1.12
  -8  -8   2    0.28    0.69
  -8  -8   2    0.47    0.53
   8   8  -2    0.44    0.50
   8   8  -2    1.27    0.53
   8   8  -2    1.72    0.77
   8   8  -2    1.08    0.56
   8   8  -2   -0.01    0.79
   8   8  -2    0.59    0.46
  -8  -7   2    7.01    0.91
  -8  -7   2    5.34    0.86
  -8  -7   2    5.75    0.74
   8   7  -2    6.83    0.91
   8   7  -2    8.22    0.91
   8   7  -2    5.86    0.86
   8   7  -2    7.40    1.04
   8   7  -2    6.33    1.12
   8   7  -2    5.76    0.96
  -8  -6   2    2.22    0.45
  -8  -6   2    1.66    0.51
  -8  -6   2    1.82    0.54
  -8  -6   2    2.39    0.55
   8   6  -2    1.90    0.52
   8   6  -2    2.08    0.50
   8   6  -2    2.40    0.48
   8   6  -2    2.32    0.82
   8   6  -2    2.25    0.68
   8   6  -2    2.54    0.52
  -8  -5   2   -0.30    0.46
  -8  -5   2    0.41    0.52
  -8  -5   2    0.16    0.44
  -8  -5   2    0.29    0.36
  -8  -5   2   -0.25    0.40
   8   5  -2   -0.18    0.41
   8   5  -2   -0.31    0.57
   8   5  -2    0.11    0.40
   8   5  -2    0.09    0.77
   8   5  -2   -0.69    0.40
   8   5  -2   -0.09    0.40
  -8  -4   2    1.82    0.48
  -8  -4   2    2.00    0.46
  -8  -4   2    2.70    0.47
  -8  -4   2    3.27    0.54
  -8  -4   2    3.28    0.57
   8   4  -2    2.88    0.73
   8   4  -2    2.44    0.48
   8   4  -2    2.66    0.65
   8   4  -2    2.56    0.48
   8   4  -2    2.68    0.50
   8   4  -2    2.53    0.46
  -8  -3   2   26.46    2.16
  -8  -3   2   29.00    2.19
  -8  -3   2   28.27    2.13
  -8  -3   2   30.91    2.20
  -8  -3   2   28.57    2.15
   8   3  -2   29.65    2.19
   8   3  -2   29.65    2.27
   8   3  -2   31.67    2.15
   8   3  -2   29.70    2.28
   8   3  -2   30.04    2.14
   8   3  -2   28.77    2.21
   8   3  -2   31.39    2.13
  -8  -2   2    7.74    0.83
  -8  -2   2    8.38    0.77
  -8  -2   2    7.35    0.87
  -8  -2   2    8.35    0.77
  -8  -2   2    6.78    0.78
   8   2  -2    6.41    0.88
   8   2  -2    7.85    0.99
   8   2  -2    7.67    0.98
   8   2  -2    7.77    0.82
   8   2  -2    8.30    0.79
   8   2  -2    8.58    0.78
  -8  -1   2    2.74    0.41
  -8  -1   2    3.60    0.43
  -8  -1   2    3.04    0.45
  -8  -1   2    3.54    0.55
  -8  -1   2    3.45    0.41
   8   1  -2    3.39    0.59
   8   1  -2    4.35    0.62
   8   1  -2    2.83    0.43
   8   1  -2    3.40    0.42
   8   1  -2    3.79    0.44
   8   1  -2    3.04    0.43
  -8   0   2    9.79    0.82
  -8   0   2    9.33    0.87
  -8   0   2    9.05    0.87
  -8   0   2   10.32    0.93
  -8   0   2    8.47    0.79
   8   0  -2    9.01    0.85
   8   0  -2    9.71    0.86
   8   0  -2   10.72    0.89
   8   0  -2    9.35    0.83
   8   0  -2   10.01    1.03
   8   0  -2    9.77    0.99
  -8   1   2   24.68    1.73
  -8   1   2   25.33    1.79
  -8   1   2   21.64    1.71
  -8   1   2   23.67    1.76
   8  -1  -2   25.90    1.79
   8  -1  -2   23.83    1.75
   8  -1  -2   24.17    1.84
   8  -1  -2   24.31    1.89
   8  -1  -2   25.07    1.78
   8  -1  -2   24.14    1.73
   8  -1  -2   23.26    1.92
  -8   2   2    4.04    0.58
  -8   2   2    3.92    0.55
  -8   2   2    4.28    0.45
  -8   2   2    3.40    0.49
  -8   2   2    3.62    0.54
   8  -2  -2    2.78    0.52
   8  -2  -2    4.10    0.70
   8  -2  -2    4.18    0.79
   8  -2  -2    3.45    0.59
   8  -2  -2    4.09    0.54
   8  -2  -2    3.89    0.49
   8  -2  -2    3.77    0.46
  -8   3   2    2.39    0.33
  -8   3   2    2.58    0.30
  -8   3   2    2.42    0.45
  -8   3   2    2.83    0.48
   8  -3  -2    3.00    0.42
   8  -3  -2    2.74    0.55
   8  -3  -2    2.21    0.34
   8  -3  -2    1.91    0.47
   8  -3  -2    2.57    0.33
   8  -3  -2    2.94    0.55
  -8   4   2   23.25    1.85
  -8   4   2   24.84    1.78
  -8   4   2   26.17    1.86
  -8   4   2   22.58    1.74
   8  -4  -2   25.84    1.79
   8  -4  -2   26.56    1.85
   8  -4  -2   26.48    1.96
   8  -4  -2   23.52    1.97
   8  -4  -2   24.16    1.75
  -8   5   2    0.48    0.43
  -8   5   2    0.29    0.25
  -8   5   2    0.28    0.40
  -8   5   2    0.33    0.41
  -8   5   2    0.20    0.42
  -8   5   2    0.21    0.24
   8  -5  -2    0.20    0.26
   8  -5  -2    0.28    0.51
   8  -5  -2    0.43    0.25
   8  -5  -2    0.11    0.43
   8  -5  -2    0.20    0.38
  -8   6   2    4.68    0.65
  -8   6   2    4.59    0.70
  -8   6   2    4.35    0.74
  -8   6   2    4.98    0.51
  -8   6   2    4.38    0.56
  -8   6   2    3.64    0.74
   8  -6  -2    5.17    0.59
   8  -6  -2    3.99    0.65
   8  -6  -2    4.32    0.54
   8  -6  -2    4.00    0.72
   8  -6  -2    4.25    0.56
  -8   7   2   -0.24    0.42
  -8   7   2   -0.35    0.26
  -8   7   2   -0.10    0.22
  -8   7   2   -0.69    0.42
  -8   7   2   -0.33    0.50
  -8   7   2   -0.02    0.39
  -8   7   2   -0.41    0.26
   8  -7  -2   -0.23    0.57
   8  -7  -2   -0.63    0.50
   8  -7  -2   -0.09    0.29
   8  -7  -2   -0.69    0.44
   8  -7  -2   -0.45    0.26
   8  -7  -2    0.15    0.28
  -8   8   2   42.71    3.08
  -8   8   2   47.52    3.18
  -8   8   2   42.00    3.20
  -8   8   2   45.45    3.26
  -8   8   2   46.24    3.13
   8  -8  -2   43.82    3.34
   8  -8  -2   43.03    3.23
   8  -8  -2   43.37    3.10
   8  -8  -2   45.88    3.43
   8  -8  -2   46.17    3.11
  -8   9   2    0.11    0.50
  -8   9   2    1.19    0.29
  -8   9   2    0.32    0.53
  -8   9   2    1.48    0.61
  -8   9   2    1.45    0.28
  -8   9   2    1.01    0.51
   8  -9  -2    1.49    0.68
   8  -9  -2    1.20    0.32
   8  -9  -2    1.69    0.73
   8  -9  -2    1.27    0.40
   8  -9  -2   -0.71    0.76
   8  -9  -2    1.35    0.32
  -8  10   2    5.56    0.79
  -8  10   2    5.87    0.78
  -8  10   2    6.36    0.63
  -8  10   2    6.75    0.92
  -8  10   2    5.44    0.59
   8 -10  -2    5.76    0.65
   8 -10  -2    4.79    0.77
   8 -10  -2    5.41    0.75
   8 -10  -2    6.66    1.24
  -8  11   2   17.63    1.51
  -8  11   2   17.87    1.88
  -8  11   2   18.19    1.36
  -8  11   2   18.75    1.47
  -8  11   2   17.31    1.34
  -8  11   2   20.26    1.74
   8 -11  -2   18.67    1.90
   8 -11  -2   17.30    1.46
   8 -11  -2   18.09    1.37
   8 -11  -2   16.29    1.65
  -8  12   2    1.21    0.47
  -8  12   2    1.49    0.58
   8 -12  -2    0.86    0.58
   8 -12  -2    0.14    0.66
   8 -12  -2    0.80    0.37
  -8  13   2    3.57    0.69
  -8  13   2    2.66    0.45
  -8  13   2    3.63    0.94
   8 -13  -2    3.20    0.47
   8 -13  -2    1.87    0.77
   8 -13  -2    1.49    0.75
  -8  14   2    0.67    0.42
  -8  14   2    1.15    0.90
   8 -14  -2    0.21    0.78
   8 -14  -2    0.45    0.46
   8 -14  -2    0.48    0.77
  -8  15   2    2.28    0.52
  -8  15   2    2.99    1.05
  -8  15   2    2.38    0.74
   8 -15  -2    2.39    0.93
   8 -15  -2    2.07    0.53
   8 -15  -2    2.15    0.92
  -8  16   2    1.13    0.59
  -8  16   2    1.84    1.11
   8 -16  -2   -1.99    1.66
   8 -16  -2    1.64    0.61
   8 -16  -2    0.96    0.98
  -7 -13   2    3.70    1.15
   7  13  -2    3.19    0.90
   7  13  -2    4.19    0.92
   7  13  -2    4.12    1.17
  -7 -12   2    1.04    0.95
   7  12  -2    0.82    0.75
   7  12  -2    1.34    0.76
   7  12  -2    2.60    1.08
  -7 -11   2    1.27    0.85
   7  11  -2    0.80    0.88
   7  11  -2    1.38    0.66
   7  11  -2    1.28    0.67
  -7 -10   2    1.09    0.79
  -7 -10   2    0.84    0.59
   7  10  -2    0.35    0.82
   7  10  -2    0.45    0.88
   7  10  -2    0.16    0.58
   7  10  -2    0.86    0.60
  -7  -9   2    4.68    0.83
  -7  -9   2    5.48    0.81
  -7  -9   2    3.69    1.02
   7   9  -2    4.01    0.96
   7   9  -2    5.10    0.99
   7   9  -2    3.46    0.62
   7   9  -2    4.45    0.89
   7   9  -2    4.34    0.67
  -7  -8   2    2.92    0.59
  -7  -8   2    3.68    0.68
  -7  -8   2    2.62    0.72
  -7  -8   2    3.48    0.77
   7   8  -2    2.92    0.55
   7   8  -2    3.18    0.60
   7   8  -2    3.69    0.79
   7   8  -2    3.54    0.43
   7   8  -2    4.05    0.61
   7   8  -2    3.06    0.51
   7   8  -2    4.64    0.90
   7   8  -2    2.19    0.78
  -7  -7   2    9.80    1.02
  -7  -7   2   11.09    1.13
  -7  -7   2   12.18    1.20
  -7  -7   2   10.53    1.20
  -7  -7   2   10.26    1.29
   7   7  -2    9.43    1.00
   7   7  -2   11.46    1.07
   7   7  -2   11.47    1.14
   7   7  -2   10.90    1.40
   7   7  -2   11.37    1.25
   7   7  -2   11.06    1.11
   7   7  -2   10.64    1.35
  -7  -6   2    1.63    0.39
  -7  -6   2    1.56    0.51
  -7  -6   2    1.12    0.50
  -7  -6   2    1.59    0.49
  -7  -6   2    2.48    0.48
  -7  -6   2    1.41    0.57
  -7  -6   2    2.19    0.50
   7   6  -2    2.41    0.43
   7   6  -2    2.63    1.14
   7   6  -2    2.34    0.47
   7   6  -2    2.46    0.49
   7   6  -2    1.85    0.62
   7   6  -2    2.07    0.48
   7   6  -2    2.35    0.57
  -7  -5   2   18.24    1.46
  -7  -5   2   18.43    1.40
  -7  -5   2   16.68    1.52
  -7  -5   2   17.26    1.45
  -7  -5   2   15.83    1.49
  -7  -5   2   17.12    1.32
  -7  -5   2   16.63    1.39
   7   5  -2   16.68    1.54
   7   5  -2   16.64    1.55
   7   5  -2   17.02    1.38
   7   5  -2   18.54    1.36
   7   5  -2   17.76    1.43
   7   5  -2   18.39    1.38
   7   5  -2   18.58    1.60
   7   5  -2   15.70    1.49
  -7  -4   2    9.13    0.93
  -7  -4   2    9.36    1.09
  -7  -4   2   10.22    1.02
  -7  -4   2    8.95    0.96
  -7  -4   2   10.25    0.89
  -7  -4   2    9.07    1.08
  -7  -4   2    8.98    0.89
   7   4  -2    9.78    1.12
   7   4  -2   10.25    1.04
   7   4  -2    9.81    0.91
   7   4  -2   10.70    0.91
   7   4  -2   10.44    0.92
   7   4  -2   11.13    1.13
   7   4  -2   10.06    0.98
  -7  -3   2   58.38    4.02
  -7  -3   2   58.32    4.02
  -7  -3   2   57.52    4.06
  -7  -3   2   51.81    4.03
  -7  -3   2   58.98    4.06
   7   3  -2   58.64    4.06
   7   3  -2   58.50    4.09
   7   3  -2   58.97    4.10
   7   3  -2   57.93    4.05
   7   3  -2   60.21    4.02
   7   3  -2   58.22    4.02
   7   3  -2   58.73    4.01
  -7  -2   2    7.85    0.76
  -7  -2   2    8.85    0.84
  -7  -2   2    7.33    0.76
  -7  -2   2    8.46    0.75
  -7  -2   2    6.64    0.76
  -7  -2   2    8.88    0.83
   7   2  -2    9.19    0.82
   7   2  -2    8.51    0.74
   7   2  -2    9.21    0.77
   7   2  -2    8.46    0.94
   7   2  -2    7.90    0.79
   7   2  -2    8.03    0.92
  -7  -1   2   21.20    1.53
  -7  -1   2   17.85    1.56
  -7  -1   2   21.98    1.56
  -7  -1   2   21.13    1.58
  -7  -1   2   20.49    1.59
   7   1  -2   21.97    1.64
   7   1  -2   20.65    1.57
   7   1  -2   20.65    1.58
   7   1  -2   21.43    1.55
   7   1  -2   23.73    2.02
   7   1  -2   23.32    1.56
  -7   0   2    6.90    0.69
  -7   0   2    7.15    0.63
  -7   0   2    6.87    0.69
  -7   0   2    7.19    0.70
  -7   0   2    6.91    0.66
   7   0  -2    6.47    0.66
   7   0  -2    6.81    0.81
   7   0  -2    7.17    0.87
   7   0  -2    8.27    0.71
   7   0  -2    6.93    0.66
   7   0  -2    7.34    0.70
  -7   1   2    4.85    0.61
  -7   1   2    5.15    0.59
  -7   1   2    5.43    0.53
  -7   1   2    4.82    0.51
   7  -1  -2    4.85    0.55
   7  -1  -2    6.49    0.64
   7  -1  -2    4.17    0.80
   7  -1  -2    5.23    0.60
   7  -1  -2    6.19    0.83
   7  -1  -2    5.20    0.55
   7  -1  -2    5.01    0.70
  -7   2   2    1.47    0.40
  -7   2   2    1.95    0.26
  -7   2   2    1.62    0.29
  -7   2   2    1.87    0.38
   7  -2  -2    1.76    0.44
   7  -2  -2    2.10    0.48
   7  -2  -2    1.89    0.37
   7  -2  -2    1.68    0.27
   7  -2  -2    1.83    0.27
   7  -2  -2    2.50    0.36
   7  -2  -2    1.10    0.40
  -7   3   2   23.39    1.84
  -7   3   2   28.01    1.94
  -7   3   2   27.17    1.91
  -7   3   2   26.63    1.88
   7  -3  -2   27.62    1.88
   7  -3  -2   25.79    2.04
   7  -3  -2   27.06    2.02
   7  -3  -2   27.44    1.89
   7  -3  -2   26.50    1.92
   7  -3  -2   25.48    1.85
  -7   4   2    2.97    0.44
  -7   4   2    2.70    0.32
  -7   4   2    3.16    0.47
  -7   4   2    2.77    0.31
  -7   4   2    2.65    0.33
  -7   4   2    2.94    0.47
   7  -4  -2    2.80    0.45
   7  -4  -2    3.37    0.42
   7  -4  -2    1.77    0.44
   7  -4  -2    2.72    0.52
   7  -4  -2    2.83    0.46
   7  -4  -2    2.81    0.31
  -7   5   2    0.73    0.24
  -7   5   2    1.12    0.22
  -7   5   2    0.80    0.40
  -7   5   2    1.02    0.30
  -7   5   2    0.42    0.37
  -7   5   2    0.72    0.32
   7  -5  -2    0.86    0.24
   7  -5  -2    1.27    0.24
   7  -5  -2    1.11    0.36
   7  -5  -2    0.88    0.26
   7  -5  -2    0.52    0.39
   7  -5  -2    1.07    0.47
  -7   6   2    6.79    0.57
  -7   6   2    6.38    0.74
  -7   6   2    6.18    0.63
  -7   6   2    6.70    0.83
  -7   6   2    5.91    0.57
  -7   6   2    6.66    0.80
  -7   6   2    5.72    0.70
   7  -6  -2    6.24    0.96
   7  -6  -2    6.02    0.61
   7  -6  -2    6.43    0.59
   7  -6  -2    5.55    0.79
   7  -6  -2    6.49    0.59
   7  -6  -2    6.47    0.96
  -7   7   2    0.99    0.41
  -7   7   2    1.96    0.42
  -7   7   2    1.80    0.26
  -7   7   2    1.46    0.43
  -7   7   2    1.26    0.27
  -7   7   2    1.91    0.52
  -7   7   2    2.20    0.26
   7  -7  -2    2.33    0.34
   7  -7  -2    1.62    0.52
   7  -7  -2    1.70    0.29
   7  -7  -2    2.13    0.29
   7  -7  -2    1.38    0.57
   7  -7  -2    1.40    0.46
  -7   8   2    8.40    1.09
  -7   8   2    8.33    0.74
  -7   8   2    8.74    0.73
  -7   8   2    8.46    1.08
  -7   8   2    8.90    0.88
  -7   8   2    8.32    0.92
   7  -8  -2    8.95    0.75
   7  -8  -2    8.59    1.04
   7  -8  -2    9.02    0.80
   7  -8  -2    9.22    1.21
   7  -8  -2    9.90    0.79
   7  -8  -2    9.63    1.39
  -7   9   2   34.94    2.69
  -7   9   2   42.41    2.90
  -7   9   2   35.46    2.82
  -7   9   2   36.95    2.65
  -7   9   2   35.74    2.57
   7  -9  -2   35.44    2.84
   7  -9  -2   34.06    2.76
   7  -9  -2   39.30    2.61
   7  -9  -2   36.15    2.63
   7  -9  -2   41.35    2.97
  -7  10   2    1.98    0.30
  -7  10   2    1.35    0.51
  -7  10   2    1.80    0.46
  -7  10   2    2.50    0.73
  -7  10   2    1.95    0.33
  -7  10   2    1.02    0.58
   7 -10  -2    2.04    0.35
   7 -10  -2    0.98    0.72
   7 -10  -2    1.16    0.60
   7 -10  -2    2.15    0.38
   7 -10  -2    2.53    0.47
   7 -10  -2    3.55    0.81
  -7  11   2    0.39    0.40
  -7  11   2    0.99    0.50
  -7  11   2   -0.37    0.68
   7 -11  -2    0.14    0.49
   7 -11  -2   -0.10    0.72
   7 -11  -2    1.04    0.34
   7 -11  -2   -0.23    0.59
  -7  12   2   13.61    1.05
  -7  12   2   14.22    1.10
  -7  12   2   11.26    1.37
  -7  12   2   12.98    1.52
   7 -12  -2   12.54    1.06
   7 -12  -2   11.04    1.44
   7 -12  -2   11.52    1.64
   7 -12  -2   12.66    1.26
   7 -13  -2    6.17    0.77
  -7  15   2    2.37    0.55
  -7  15   2    3.19    1.10
   7 -15  -2    1.63    0.53
   7 -15  -2    1.06    0.91
   7 -15  -2    2.20    0.92
  -7  16   2    2.66    1.13
  -7  16   2    3.07    0.62
   7 -16  -2    2.46    0.63
   7 -16  -2    1.85    0.99
   7 -16  -2    2.06    1.05
  -6 -14   2   -0.20    1.04
   6  14  -2    0.85    0.83
   6  14  -2    0.79    1.14
   6  14  -2    0.90    0.89
  -6 -13   2   -0.22    0.95
   6  13  -2    0.87    0.99
   6  13  -2   -0.75    0.74
   6  13  -2    0.49    0.76
  -6 -12   2    5.07    0.94
   6  12  -2    5.07    0.87
   6  12  -2    7.34    1.11
   6  12  -2    4.58    0.76
  -6 -11   2    0.09    0.76
   6  11  -2    0.82    0.57
   6  11  -2    0.31    0.61
   6  11  -2    0.21    0.79
  -6 -10   2   17.25    1.50
  -6 -10   2   12.97    1.22
   6  10  -2   14.65    1.31
   6  10  -2   10.56    1.56
   6  10  -2   12.20    1.37
   6  10  -2   14.92    1.55
  -6  -9   2   -0.19    0.58
  -6  -9   2   -0.06    0.44
  -6  -9   2   -0.02    0.57
   6   9  -2    0.19    0.69
   6   9  -2    0.41    0.56
   6   9  -2    0.30    0.72
   6   9  -2    0.58    0.74
   6   9  -2   -0.42    0.89
   6   9  -2   -0.11    0.45
  -6  -8   2   11.67    1.34
  -6  -8   2   11.52    1.08
  -6  -8   2   12.37    1.28
  -6  -8   2   12.30    1.18
   6   8  -2   12.31    1.49
   6   8  -2   12.45    1.14
   6   8  -2   11.50    1.34
   6   8  -2   12.00    1.37
   6   8  -2   12.80    1.20
   6   8  -2   11.74    1.18
  -6  -7   2    0.09    0.50
  -6  -7   2    0.22    0.55
  -6  -7   2    0.27    0.39
  -6  -7   2   -0.26    0.47
   6   7  -2   -0.94    0.36
   6   7  -2   -0.53    0.56
   6   7  -2   -0.38    0.38
   6   7  -2   -0.61    0.73
   6   7  -2   -0.63    0.42
   6   7  -2   -0.16    0.49
   6   7  -2   -0.28    0.42
  -6  -6   2    7.42    0.77
  -6  -6   2    6.58    0.88
  -6  -6   2    7.43    0.84
  -6  -6   2    8.07    0.91
  -6  -6   2    6.08    0.93
  -6  -6   2    6.27    0.89
   6   6  -2    5.84    0.82
   6   6  -2    6.09    1.05
   6   6  -2    7.25    0.86
   6   6  -2    5.68    0.98
   6   6  -2    6.93    0.78
   6   6  -2    6.87    0.79
   6   6  -2    6.46    1.05
  -6  -5   2    2.22    0.39
  -6  -5   2    1.78    0.41
  -6  -5   2    2.07    0.45
  -6  -5   2    2.35    0.48
  -6  -5   2    2.04    0.32
  -6  -5   2    1.35    0.42
  -6  -5   2    1.77    0.39
   6   5  -2    2.64    0.39
   6   5  -2    2.60    0.63
   6   5  -2    0.93    0.41
   6   5  -2    2.03    0.39
   6   5  -2    1.62    0.41
   6   5  -2    1.49    0.44
   6   5  -2    1.30    0.56
   6   5  -2    1.72    0.40
  -6  -4   2   19.80    1.38
  -6  -4   2   21.42    1.41
  -6  -4   2   17.94    1.41
  -6  -4   2   17.30    1.43
  -6  -4   2   17.45    1.31
  -6  -4   2   16.03    1.41
  -6  -4   2   17.26    1.35
   6   4  -2   16.83    1.33
   6   4  -2   17.64    1.34
   6   4  -2   17.00    1.47
   6   4  -2   18.79    1.35
   6   4  -2   16.81    1.38
   6   4  -2   19.20    1.47
   6   4  -2   16.37    1.44
   6   4  -2   16.70    1.41
  -6  -3   2   15.81    1.24
  -6  -3   2   16.92    1.30
  -6  -3   2   16.12    1.22
  -6  -3   2   14.39    1.24
  -6  -3   2   16.94    1.30
  -6  -3   2   15.79    1.34
  -6  -3   2   18.48    1.29
   6   3  -2   16.63    1.23
   6   3  -2   16.64    1.23
   6   3  -2   15.76    1.36
   6   3  -2   17.27    1.35
   6   3  -2   16.86    1.24
   6   3  -2   16.45    1.30
   6   3  -2   16.02    1.27
  -6  -2   2   11.73    0.87
  -6  -2   2    9.77    0.90
  -6  -2   2   10.53    0.90
  -6  -2   2   11.87    0.96
  -6  -2   2   10.32    0.93
  -6  -2   2   10.20    0.89
  -6  -2   2   11.25    0.89
   6   2  -2   11.09    0.93
   6   2  -2   11.40    0.94
   6   2  -2   11.47    0.91
   6   2  -2   12.16    1.01
   6   2  -2   11.81    1.04
   6   2  -2   10.44    0.89
  -6  -1   2   66.71    4.57
  -6  -1   2   64.98    4.56
  -6  -1   2   68.08    4.57
  -6  -1   2   55.79    4.54
  -6  -1   2   73.24    4.55
  -6  -1   2   63.49    4.57
   6   1  -2   63.63    4.58
   6   1  -2   66.51    4.54
   6   1  -2   67.14    4.57
   6   1  -2   66.30    4.56
   6   1  -2   72.00    4.56
   6   1  -2   66.85    4.61
  -6   0   2   -0.02    0.23
  -6   0   2   -0.25    0.25
  -6   0   2   -0.24    0.27
  -6   0   2   -0.10    0.21
  -6   0   2   -0.29    0.21
  -6   0   2    0.21    0.22
   6   0  -2   -0.31    0.22
   6   0  -2   -0.08    0.28
   6   0  -2   -0.22    0.23
   6   0  -2   -0.26    0.37
   6   0  -2    0.53    0.44
  -6   1   2   27.23    2.06
  -6   1   2   29.31    2.02
  -6   1   2   31.24    2.05
  -6   1   2   28.26    2.05
   6  -1  -2   28.87    2.02
   6  -1  -2   29.53    2.05
   6  -1  -2   29.07    2.05
   6  -1  -2   27.72    2.04
   6  -1  -2   28.94    2.15
[truncated: 2,461,279 more chars]
