# Supplementary material for: Iron(ii) coordination complexes with panchromatic absorption and nanosecond charge-transfer excited state lifetimes
Source: Springer Nature journal article supplement (doi:10.1038/s41557-019-0357-z), 2019-11-18
Supplement: 41557_2019_357_MOESM47_ESM.mol [file 41557_2019_357_MOESM47_ESM.mol]

nchem.18102249B-comp3a.mol
  ChemDraw09241912312D

 59 70  0  0  1  0  0  0  0  0999 V2000
   -1.8388   -3.1466    0.0000 C   0  0  0  0  0  0  0  0  0  0  0  0
    1.5214    3.1235    0.0000 C   0  0  0  0  0  0  0  0  0  0  0  0
   -1.2618    0.6035    0.0000 N   0  0  0  0  0  0  0  0  0  0  0  0
   -0.8906    1.9659    0.0000 C   0  0  0  0  0  0  0  0  0  0  0  0
   -1.0423    2.8019    0.0000 C   0  0  0  0  0  0  0  0  0  0  0  0
   -1.7167    3.1111    0.0000 C   0  0  0  0  0  0  0  0  0  0  0  0
   -2.2394    2.5848    0.0000 C   0  0  0  0  0  0  0  0  0  0  0  0
   -2.0878    1.7487    0.0000 C   0  0  0  0  0  0  0  0  0  0  0  0
   -1.4134    1.4396    0.0000 C   0  0  0  0  0  0  0  0  0  0  0  0
   -2.6105    1.2218    0.0000 C   0  0  0  0  0  0  0  0  0  0  0  0
   -2.4589    0.3858    0.0000 C   0  0  0  0  0  0  0  0  0  0  0  0
   -1.7845    0.0766    0.0000 C   0  0  0  0  0  0  0  0  0  0  0  0
    1.1756   -0.7087    0.0000 N   0  0  0  0  0  0  0  0  0  0  0  0
    0.6540   -2.0610    0.0000 C   0  0  0  0  0  0  0  0  0  0  0  0
    0.7054   -2.9024    0.0000 C   0  0  0  0  0  0  0  0  0  0  0  0
    1.3290   -3.2322    0.0000 C   0  0  0  0  0  0  0  0  0  0  0  0
    1.9013   -2.7207    0.0000 C   0  0  0  0  0  0  0  0  0  0  0  0
    1.8500   -1.8799    0.0000 C   0  0  0  0  0  0  0  0  0  0  0  0
    1.2263   -1.5501    0.0000 C   0  0  0  0  0  0  0  0  0  0  0  0
    2.4223   -1.3683    0.0000 C   0  0  0  0  0  0  0  0  0  0  0  0
    2.3710   -0.5276    0.0000 C   0  0  0  0  0  0  0  0  0  0  0  0
    1.7479   -0.1977    0.0000 C   0  0  0  0  0  0  0  0  0  0  0  0
   -0.0681   -1.6622    0.0000 N   0  5  0  0  0  0  0  0  0  0  0  0
   -0.0658   -0.1612    0.0000 Fe  0  2  0  0  0  0  0  0  0  0  0  0
   -1.1756   -2.9348    0.0000 C   0  0  0  0  0  0  0  0  0  0  0  0
   -0.9685   -2.1200    0.0000 C   0  0  0  0  0  0  0  0  0  0  0  0
   -1.4240   -1.5158    0.0000 C   0  0  0  0  0  0  0  0  0  0  0  0
   -2.0872   -1.7277    0.0000 C   0  0  0  0  0  0  0  0  0  0  0  0
   -2.2943   -2.5436    0.0000 C   0  0  0  0  0  0  0  0  0  0  0  0
   -1.2169   -0.6998    0.0000 N   0  0  0  0  0  0  0  0  0  0  0  0
   -1.6712   -0.0963    0.0000 C   0  0  0  0  0  0  0  0  0  0  0  0
   -2.3350   -0.3081    0.0000 C   0  0  0  0  0  0  0  0  0  0  0  0
   -2.5421   -1.1241    0.0000 C   0  0  0  0  0  0  0  0  0  0  0  0
   -2.7999    0.2837    0.0000 C   0  0  0  0  0  0  0  0  0  0  0  0
   -3.4720    0.0607    0.0000 C   0  0  0  0  0  0  0  0  0  0  0  0
   -3.6790   -0.7541    0.0000 C   0  0  0  0  0  0  0  0  0  0  0  0
   -3.2141   -1.3471    0.0000 C   0  0  0  0  0  0  0  0  0  0  0  0
   -0.0782    1.5906    0.0000 N   0  5  0  0  0  0  0  0  0  0  0  0
    0.8706    2.8922    0.0000 C   0  0  0  0  0  0  0  0  0  0  0  0
    0.7561    2.0744    0.0000 C   0  0  0  0  0  0  0  0  0  0  0  0
    1.2913    1.4868    0.0000 C   0  0  0  0  0  0  0  0  0  0  0  0
    1.9420    1.7180    0.0000 C   0  0  0  0  0  0  0  0  0  0  0  0
    2.0565    2.5370    0.0000 C   0  0  0  0  0  0  0  0  0  0  0  0
    1.1762    0.6684    0.0000 N   0  0  0  0  0  0  0  0  0  0  0  0
    1.7113    0.0807    0.0000 C   0  0  0  0  0  0  0  0  0  0  0  0
    2.3621    0.3126    0.0000 C   0  0  0  0  0  0  0  0  0  0  0  0
    2.4772    1.1310    0.0000 C   0  0  0  0  0  0  0  0  0  0  0  0
    2.9055   -0.2626    0.0000 C   0  0  0  0  0  0  0  0  0  0  0  0
    3.5646   -0.0201    0.0000 C   0  0  0  0  0  0  0  0  0  0  0  0
    3.6790    0.7982    0.0000 C   0  0  0  0  0  0  0  0  0  0  0  0
    3.1356    1.3735    0.0000 C   0  0  0  0  0  0  0  0  0  0  0  0
   -2.0565   -3.9632    0.0000 C   0  0  0  0  0  0  0  0  0  0  0  0
   -1.2326   -4.1829    0.0000 C   0  0  0  0  0  0  0  0  0  0  0  0
   -2.2762   -4.7872    0.0000 C   0  0  0  0  0  0  0  0  0  0  0  0
   -2.8804   -3.7435    0.0000 C   0  0  0  0  0  0  0  0  0  0  0  0
    1.6464    3.9442    0.0000 C   0  0  0  0  0  0  0  0  0  0  0  0
    0.8035    4.0727    0.0000 C   0  0  0  0  0  0  0  0  0  0  0  0
    1.7749    4.7872    0.0000 C   0  0  0  0  0  0  0  0  0  0  0  0
    2.4894    3.8157    0.0000 C   0  0  0  0  0  0  0  0  0  0  0  0
 52 53  1  0      
 52 54  1  0      
 52 55  1  0      
  1 52  1  0      
 56 57  1  0      
 56 58  1  0      
 56 59  1  0      
  2 56  1  0      
  4  5  2  0      
  5  6  1  0      
  6  7  2  0      
  7  8  1  0      
  8  9  2  0      
  9  4  1  0      
  8 10  1  0      
 10 11  2  0      
 11 12  1  0      
 12  3  2  0      
  3  9  1  0      
 14 15  2  0      
 15 16  1  0      
 16 17  2  0      
 17 18  1  0      
 18 19  2  0      
 19 14  1  0      
 18 20  1  0      
 20 21  2  0      
 21 22  1  0      
 22 13  2  0      
 13 19  1  0      
 23 14  1  0      
 24 13  1  6      
 26 23  1  0      
 24 30  1  1      
  1 25  2  0      
 25 26  1  0      
 26 27  2  0      
 27 28  1  0      
 28 29  2  0      
 29  1  1  0      
 27 30  1  0      
 30 31  2  0      
 31 32  1  0      
 32 33  2  0      
 33 28  1  0      
 32 34  1  0      
 34 35  2  0      
 35 36  1  0      
 36 37  2  0      
 37 33  1  0      
 38  4  1  0      
 40 38  1  0      
 24  3  1  6      
 24 44  1  1      
  2 39  2  0      
 39 40  1  0      
 40 41  2  0      
 41 42  1  0      
 42 43  2  0      
 43  2  1  0      
 41 44  1  0      
 44 45  2  0      
 45 46  1  0      
 46 47  2  0      
 47 42  1  0      
 46 48  1  0      
 48 49  2  0      
 49 50  1  0      
 50 51  2  0      
 51 47  1  0      
M  CHG  3  23  -1  24   2  38  -1
M  STY  1   1 SUP
M  SLB  1   1   1
M  SAL   1  4  52  53  54  55
M  SBL   1  1   4
M  SMT   1 \St\nBu
M  SBV   1   4    0.2177    0.8166
M  STY  1   2 SUP
M  SLB  1   2   2
M  SAL   2  4  56  57  58  59
M  SBL   2  1   8
M  SMT   2 \St\nBu
M  SBV   2   8   -0.1251   -0.8207
M  END
